# Supplementary material for: Correlates of intended COVID-19 vaccine acceptance across time and countries: results from a series of cross-sectional surveys
Source: PubMed Central journal article supplement — BMJ Open. 2021 Aug 2;11(8):e048025. doi: 10.1136/bmjopen-2020-048025 (PMC8331327; doi:10.1136/bmjopen-2020-048025), 2021-08-02
Supplement: bmjopen-2020-048025.draft_revisions.pdf [file bmjopen-2020-048025.draft_revisions.pdf]

# BMJ Open

BMJ Open is committed to open peer review. As part of this commitment we make the peer review history of every article we publish publicly available.

When an article is published we post the peer reviewers' comments and the authors' responses online. We also post the versions of the paper that were used during peer review. These are the versions that the peer review comments apply to.

The versions of the paper that follow are the versions that were submitted during the peer review process. They are not the versions of record or the final published versions. They should not be cited or distributed as the published version of this manuscript.

BMJ Open is an open access journal and the full, final, typeset and author-corrected version of record of the manuscript is available on our site with no access controls, subscription charges or pay-per-view fees (<http://bmjopen.bmj.com>).

If you have any questions on BMJ Open's open peer review process please email [info.bmjopen@bmj.com](mailto:info.bmjopen@bmj.com)

# BMJ Open

## Predictors of COVID-19 vaccine acceptance across time and countries: Results from a series of cross-sectional surveys

|                               |                                                                                                                                                                                                                                                                                                                                                                                                                                                                                                                                                                                                                                                                                                                                                                                                                                                                                                                                                                            |
|-------------------------------|----------------------------------------------------------------------------------------------------------------------------------------------------------------------------------------------------------------------------------------------------------------------------------------------------------------------------------------------------------------------------------------------------------------------------------------------------------------------------------------------------------------------------------------------------------------------------------------------------------------------------------------------------------------------------------------------------------------------------------------------------------------------------------------------------------------------------------------------------------------------------------------------------------------------------------------------------------------------------|
| Journal:                      | <i>BMJ Open</i>                                                                                                                                                                                                                                                                                                                                                                                                                                                                                                                                                                                                                                                                                                                                                                                                                                                                                                                                                            |
| Manuscript ID                 | bmjopen-2020-048025                                                                                                                                                                                                                                                                                                                                                                                                                                                                                                                                                                                                                                                                                                                                                                                                                                                                                                                                                        |
| Article Type:                 | Original research                                                                                                                                                                                                                                                                                                                                                                                                                                                                                                                                                                                                                                                                                                                                                                                                                                                                                                                                                          |
| Date Submitted by the Author: | 21-Dec-2020                                                                                                                                                                                                                                                                                                                                                                                                                                                                                                                                                                                                                                                                                                                                                                                                                                                                                                                                                                |
| Complete List of Authors:     | Kerr, John; University of Cambridge, Winton Centre for Risk and Evidence Communication; University of Cambridge, Department of Psychology<br>Schneider, Claudia; University of Cambridge, Winton Centre for Risk & Evidence Communication; University of Cambridge, Department of Psychology<br>Recchia, Gabriel; University of Cambridge, Winton Centre for Risk & Evidence Communication<br>Dryhurst, Sarah; University of Cambridge, Winton Centre for Risk & Evidence Communication<br>Sahlin, Ullrika; Lund University, Center of Environmental and Climate Sciences<br>Dufouil, Carole; University of Bordeaux, Bordeaux Population Health Research Center, U1219, Inserm; Centre Hospitalier Universitaire de Bordeaux, Pole de sante publique<br>Arwidson, Pierre; Santé publique France<br>Freeman, Alexandra; Cambridge University, Winton Centre for Risk & Evidence Communication<br>van der Linden, Sander; University of Cambridge, Department of Psychology |
| Keywords:                     | COVID-19, Public health < INFECTIOUS DISEASES, PREVENTIVE MEDICINE                                                                                                                                                                                                                                                                                                                                                                                                                                                                                                                                                                                                                                                                                                                                                                                                                                                                                                         |
|                               |                                                                                                                                                                                                                                                                                                                                                                                                                                                                                                                                                                                                                                                                                                                                                                                                                                                                                                                                                                            |

SCHOLARONE™  
Manuscripts

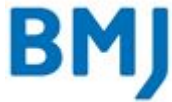

I, the Submitting Author has the right to grant and does grant on behalf of all authors of the Work (as defined in the below author licence), an exclusive licence and/or a non-exclusive licence for contributions from authors who are: i) UK Crown employees; ii) where BMJ has agreed a CC-BY licence shall apply, and/or iii) in accordance with the terms applicable for US Federal Government officers or employees acting as part of their official duties; on a worldwide, perpetual, irrevocable, royalty-free basis to BMJ Publishing Group Ltd ("BMJ") its licensees and where the relevant Journal is co-owned by BMJ to the co-owners of the Journal, to publish the Work in this journal and any other BMJ products and to exploit all rights, as set out in our [licence](#).

The Submitting Author accepts and understands that any supply made under these terms is made by BMJ to the Submitting Author unless you are acting as an employee on behalf of your employer or a postgraduate student of an affiliated institution which is paying any applicable article publishing charge ("APC") for Open Access articles. Where the Submitting Author wishes to make the Work available on an Open Access basis (and intends to pay the relevant APC), the terms of reuse of such Open Access shall be governed by a Creative Commons licence – details of these licences and which [Creative Commons](#) licence will apply to this Work are set out in our licence referred to above.

Other than as permitted in any relevant BMJ Author's Self Archiving Policies, I confirm this Work has not been accepted for publication elsewhere, is not being considered for publication elsewhere and does not duplicate material already published. I confirm all authors consent to publication of this Work and authorise the granting of this licence.

1  
2  
3  
4  
5  
6 **Predictors of COVID-19 vaccine acceptance across time and countries: Results**  
7 **from a series of cross-sectional surveys**  
8  
9

10 John R. Kerr\*<sup>1,2</sup>, Claudia R. Schneider<sup>1,2</sup>, Gabriel Recchia<sup>2</sup>, Sarah Dryhurst<sup>1,2</sup>, Ullrika  
11 Sahlin<sup>3</sup>, Carole Dufouil<sup>4,5</sup>, Pierre Arwidson<sup>6</sup>, Alexandra L. J. Freeman<sup>2</sup>, and Sander van der  
12 Linden<sup>1,2</sup>  
13  
14  
15  
16  
17

18  
19 \*Corresponding author: [jk802@cam.ac.uk](mailto:jk802@cam.ac.uk); +44 7305481785  
20

21 <sup>1</sup> Department of Psychology, School of Biological Sciences, University of Cambridge,  
22  
23 Downing Street, CB2 3EB Cambridge, UK.  
24

25 <sup>2</sup> Winton Centre for Risk and Evidence Communication, University of Cambridge,  
26  
27 Wilberforce Road, CB3 0WA Cambridge, UK.  
28

29  
30 <sup>3</sup>Center of Environmental and Climate Sciences, Lund University, Lund, Sweden  
31

32  
33 <sup>4</sup>Univ. Bordeaux, Inserm, Bordeaux Population Health Research Center, UMR 1219, Inserm,  
34  
35 Bordeaux, France  
36

37 <sup>5</sup>Pole de sante publique Centre Hospitalier Universitaire (CHU) de Bordeaux,  
38  
39 Bordeaux, France.  
40

41  
42 <sup>6</sup>Santé publique France, Saint-Maurice, France  
43  
44  
45

46 Word count: 4,184  
47  
48  
49  
50  
51  
52  
53  
54  
55  
56  
57  
58  
59  
60

**ABSTRACT**

Objective: Describe demographic, social, and psychological correlates of willingness to receive a COVID-19 vaccine.

Setting: Series of online surveys undertaken between March and October, 2020.

Participants: A total of 25 separate national samples (matched to country population by age and sex) in 12 different countries were recruited through online panel providers ( $N = 25,334$ ).

Primary outcome measures: Reported willingness to receive a COVID-19 vaccination.

Results: Multivariate logistic regression analyses reveal sex (female OR = 0.59, 95%CI [0.55, 0.64]), trust in medical and scientific experts (OR = 1.27, [1.22, 1.33]), and worry about the COVID-19 virus (OR = 1.49, [1.43, 1.55]) as the strongest predictors of stated vaccine acceptance considering pooled data, and the most consistent predictors across countries. In a subset of UK samples we show that these effects are robust after controlling for attitudes towards vaccination in general.

Conclusions: Our results indicate that the burden of trust largely rests on the shoulders of the scientific and medical community, with implications for how future COVID-19 vaccination information should be communicated to maximize uptake.

Keywords: Vaccination, vaccine hesitancy, COVID-19, risk, trust.

## ARTICLE SUMMARY

### Strengths and limitation of this study

- To examine predictors of vaccine acceptance we collected data from a large number of participants in several different countries and at different time points.
- We examine range of demographic, risk and trust-related predictors using multivariate models.
- Samples were quota matched (age and gender) to country population, but not probability sampled.
- At the time of surveys no COVID-19 vaccine was publicly available, thus stated acceptance is hypothetical, and may change with provision of more information about current vaccines.

## INTRODUCTION

COVID-19 has resulted in over a million deaths globally, illness for millions more, and unprecedented social and economic disruption[1,2]. Many governments have signaled that mass vaccination against the virus is the most straightforward—and possibly only—route to normality and stability[3,4]. While recent announcements of effective vaccines[5,6] are promising, the wider impact of vaccines on preventing the spread of disease is also dependent on the uptake within a given population. In order to achieve ‘herd immunity’, enough people in a population must be immune to prevent the spread of a disease among non-immune individuals. The proportion varies depending on a number of factors including how infectious the contagion is, its prevalence in a population, and the variation in individual susceptibility or exposure to infection[7]. Estimates for the level of immunity required for COVID-19 herd immunity have ranged from 50% to 80% of the population, acquired through either natural infection and recovery, or through vaccination[8,9].

Vaccine hesitancy—defined as a delay in acceptance or refusal of vaccines despite availability[10]—poses a challenge to achieving herd immunity. If a sufficient number of people in a population reject vaccination—and herd immunity is not achieved—the virus will continue to circulate among susceptible individuals, including those who are unable to be vaccinated for medical reasons. The WHO identified vaccine hesitancy as one of the top 10 threats to global health in 2019[11], and in the pressing context of COVID-19, understanding vaccine hesitancy has only grown in importance[12].

Public health researchers concerned with uptake of vaccination have understandably sought to uncover the drivers of vaccine hesitancy. By identifying antecedents of vaccine hesitancy, policy makers, public health officials, and professional communicators can target interventions to increase uptake of vaccines and ultimately reduce the burden of disease in a population[4]. However, strategies developed for campaigns targeting diseases with well-

1  
2  
3 established vaccines (e.g. MMR, pertussis) may not fully translate to a pandemic context  
4  
5 where there is greater uncertainty, less information available, and where institutional trust  
6  
7 plays a greater role—as was noted in the wake of the 2009 H1N1 influenza pandemic[13].  
8  
9

10  
11 Recent evidence shows that acceptance of a COVID-19 vaccine is far from universal  
12  
13 in many countries. Lazarus et al[14] conducted a series of surveys across 19 countries in June  
14  
15 2020, asking respondents how much they agreed with the following statement: ‘If a COVID-  
16  
17 19 vaccine is proven safe and effective and is available, I will take it’. The proportion of  
18  
19 respondents who agreed ranged from 88.6% (China) to 55.8% (Russia). Examining possible  
20  
21 predictors of vaccine acceptance, the authors report that men, older people, and those who  
22  
23 express greater trust in the government were more likely to express willingness to receive a  
24  
25 vaccine. The role of trust (in science, the government or the medical system) is a recurring  
26  
27 theme in many other recent studies which have examined COVID-19 vaccine hesitancy in  
28  
29 individual countries[15–20]. For example, Palamenghi et al[20] report that across two large  
30  
31 random samples of the Italian population, trust in science was positively correlated ( $r = .37$ )  
32  
33 with willingness to receive a COVID-19 vaccine. Frank and Arim[16] report that Canadians  
34  
35 who are more trusting of local and national government bodies are more likely to express  
36  
37 intentions to receive a vaccine if available, as are those who report high general social trust  
38  
39 (i.e. believing that ‘most people can be trusted’).  
40  
41  
42  
43  
44  
45

46  
47 Such results align with pre-COVID studies which have highlighted the role of trust in  
48  
49 vaccination intentions and attitudes[13,21,22]. However, we note that recent studies  
50  
51 examining COVID-19 vaccine intentions have typically only examined trust in one entity  
52  
53 (e.g. government or hospitals); research to date has not considered the possible overlap  
54  
55 between trust in the government, trust in science and medicine, and general social trust[23–  
56  
57 25]. There is also a question over the extent to which vaccine acceptance is linked to mistrust  
58  
59 in experts and authorities *regarding COVID-19 in particular*, or a more general lack of trust  
60



1  
2  
3 in these actors. In order to target communications specifically designed to satisfy the  
4  
5 information needs of those who distrust official authorities, it is important to identify the  
6  
7 precise agents that they distrust (and, ideally, why).  
8  
9

10  
11 Beyond trust, the perceived threat or risk posed by a given disease has also been  
12  
13 shown to predict vaccination attitudes. Models of health behavior, such as the Health Belief  
14  
15 Model[26] and Protection Motivation Theory[27], place the perceived risk or severity of a  
16  
17 disease as a key driver of vaccination intentions (and other preventative health  
18  
19 behaviors)[13,28]. Recent surveys in the US, Malaysia, and Israel have shown that perceived  
20  
21 risk and worry regarding the COVID-19 virus is associated with vaccine acceptance[29–31].  
22  
23 Other factors, such as the perceived benefits and costs as well as efficacy of protective  
24  
25 behaviors are also outlined in models of health behavior as predictors of engagement in a  
26  
27 given health behavior. However, until recently, little information about the possible costs,  
28  
29 distribution and efficacy of a COVID-19 vaccine was available, meaning that the public has  
30  
31 not generally been able to assess the potential benefits of a vaccine outside of a purely  
32  
33 hypothetical arena (although experimental work has examined the influence of these factors  
34  
35 on willingness to receive a vaccine[32]).  
36  
37  
38  
39  
40

41  
42 There are also increasing concerns about the politicization of science and about  
43  
44 politics becoming entangled with vaccine beliefs and attitudes specifically, particularly in the  
45  
46 context of a pandemic where central government structures are deeply involved in all stages  
47  
48 of the public health response[13,33]. Prior research[34] has shown that the rhetoric adopted  
49  
50 by political elites on social media can fuel anti-vaccination attitudes amongst their followers  
51  
52 and that ideologies can help explain anti-vaccination attitudes[30,35].  
53  
54  
55

56  
57 In the current study we present a more comprehensive international analysis of the  
58  
59 role of key social, political, and psychological predictors of COVID-19 vaccine acceptance  
60

1  
2  
3 across 12 countries, with multiple national surveys in some countries (total  $N = 25,334$ , see  
4 Table 1). All samples were recruited via online panel providers using quotas to ensure  
5  
6 Table 1). All samples were recruited via online panel providers using quotas to ensure  
7  
8 samples were matched to the general population in terms of age and gender (with the  
9  
10 exception of France, see methods). Unlike previous studies, we examine reported trust in a  
11  
12 range of actors, both in general and specifically relating to the COVID-19 pandemic. We also  
13  
14 include several demographic factors (including political orientation), numeracy (known to  
15  
16 play a role in risk perceptions[36], and vaccine attitudes in particular[37]), affective (worry)  
17  
18 and cognitive (perceived likelihood of infection) aspects of perceived COVID-19 risk[38],  
19  
20 broad measures of perceived efficacy, and, in a subset of samples, general attitudes towards  
21  
22 vaccines.  
23  
24  
25  
26

## 27 **METHODS**

### 28 **Participants and procedure**

29  
30  
31 Between March and October 2020, we fielded 25 separate surveys across 12  
32  
33 countries. The majority of samples were recruited through an ISO certified international  
34  
35 survey company Respondi (respondi.com). Participants in Australia were recruited through  
36  
37 Dynata (dynata.com), and additional US and UK samples were recruited via Prolific  
38  
39 (prolific.ac). Quota-based sampling ensured all samples were representative of the country  
40  
41 population in terms of age and gender, and, in Prolific samples, ethnicity [39]. Participants  
42  
43 who had previously completed a survey were prevented from completing further surveys, so  
44  
45 all our samples represent different individuals. Participants who did not finish the survey  
46  
47 were excluded. Demographic details for each sample are shown in Table 1. For completeness  
48  
49 we include several samples in which vaccine acceptance was measured, but the survey did  
50  
51 not always include all the predictor variables used in models presented below. Surveys which  
52  
53 did not include all predictor variables are marked with a '\*' in Table 1.  
54  
55  
56  
57  
58  
59  
60

1  
2  
3 All participants were directed via a study link to the Qualtrics platform, and provided  
4 informed consent before completing the survey. This study was overseen by the University of  
5  
6 Cambridge Psychology Research Ethics Committee (PRE.2020.034).  
7  
8  
9

## 10 **Materials**

11  
12  
13 Participants reported their age and gender, level of education (ranging from *No formal*  
14 *education above age 16 to PhD*), and political orientation (*Very liberal/left wing to Very*  
15 *conservative/right wing*). Numeracy was measured as a combined index of the 2-3 item  
16 adaptive form of the Berlin Numeracy Test [40] and an additional risk literacy item from  
17  
18 Lipkus et al.[41].  
19  
20  
21  
22  
23  
24

25  
26 Participants completed a widely used measure of general social trust (*Generally*  
27 *speaking, would you say most people can be trusted, or that you can't be too careful in*  
28 *dealing with people?*)[42] and a separate measure of prosociality (*To what extent do you think*  
29 *it's important to do things for the benefit of others and society even if they have some costs to*  
30 *you personally?*). Trust in experts and trust in government were each measured as the  
31 combined average of reported trust in three targets (experts: scientists, medical doctors and  
32 nurses, and scientific knowledge [Cronbach's  $\alpha$  .77-.86]; government: politicians, current  
33 government, civil servants [ $\alpha$  .73-.90]; all from *Cannot be trusted at all to Can be trusted a*  
34 *lot*). We also asked participants to report their trust in several actors with specific regard to  
35 the COVID-19 pandemic. Participants reported the extent to which they trust politicians in  
36 their country to 'deal effectively with the pandemic', and how much they separately trusted  
37 the country's national scientific and medical advisors, independent experts not connected  
38 with government, and the WHO to 'know the best measures to take in the face of the  
39 pandemic' (all from *Not at all to Very much*). Personal and government efficacy were  
40 captured by items asking participants the extent to which they felt that, respectively, their  
41 own actions, and the actions of their country 'to limit the spread of coronavirus can make a  
42  
43  
44  
45  
46  
47  
48  
49  
50  
51  
52  
53  
54  
55  
56  
57  
58  
59  
60

1  
2  
3 difference' (*Not at all* to *Very much*). Perceived likelihood of infection was measured as an  
4 index of three related items (example: *I will probably get sick with the coronavirus/COVID-*  
5 *19; as .71-.89*). Participants also reported their level of worry about the virus (from *Not at all*  
6 *worried* to *Very worried*). In a subset of UK samples, we also asked participants about their  
7 general attitude towards vaccination, using two items from Lewandowsky et al.'s [35] scale  
8 (example: *I believe that vaccines are a safe and reliable way to help avert the spread of*  
9 *preventable diseases [rs .83-.87]*).

10  
11  
12  
13  
14  
15  
16  
17  
18  
19  
20  
21  
22  
23  
24  
25  
26  
27  
28  
29  
30  
31  
32  
33  
34  
35  
36  
37  
38  
39  
40  
41  
42  
43  
44  
45  
46  
47  
48  
49  
50  
51  
52  
53  
54  
55  
56  
57  
58  
59  
60  
Participants' vaccine acceptance was measured with the question: '*If a vaccine were*  
*to be available for the coronavirus/COVID-19 now, would you get vaccinated yourself?*'  
(*Yes/No*). Participants were also asked '*If a vaccine were to be available for the*  
*coronavirus/COVID-19 now: Would you recommend vulnerable friends/family to get*  
*vaccinated?*' (*Yes/No*). Full item wording for all measures can be found in Table S1.

Surveys were translated from English to other languages by native speakers fluent in  
English. Multi-item scales (trust in science, trust in government and perceived likelihood of  
infection) were subjected to multi-group confirmatory factor analysis to establish  
measurement invariance[43]. All scales exhibited metric invariance based on a criterion of a  
reduction in CFI no greater than .02 when constraining item factor loadings to be equal across  
different countries (see Table S2). This more relaxed criterion (compared to the widely used  
 $\Delta\text{CFI} < .01$ [43]) was applied in light of the recommendations of Rutkowski and Svetina[44]  
for analyses with a large number of groups. Metric invariance indicates that effects of the  
construct in question (but necessarily not latent means) can be compared across groups.

## RESULTS

Figure 1 shows the percentage of participants in each survey who responded that they would be willing to be vaccinated if a COVID-19 vaccine was available, or would recommend a vaccine to vulnerable others, given the options of 'Yes' or 'No'<sup>1</sup>. Across all samples, the percentage of respondents who stated they were willing to receive a vaccine ranged from 62.6% (Sweden, April) to 88.1% (Mexico, March), while the percentage of those who said they would recommend a vaccine to vulnerable others ranged from 67.5% (US, September) to 91.7% (UK, March). Descriptively, in every single sample the proportion of respondents stating a willingness to receive a vaccine was lower than the proportion who would recommend it to vulnerable others ( $M_{diff} = -5.79\%$ ,  $SD = 3.00$ ). We also note a trend of decreasing stated acceptance over time: in nearly all countries with multiple samples, vaccine acceptance in any given survey was lower than previous surveys of the same population. For example between March and May, 2020, stated vaccine acceptance among respondents in Mexico dropped from 88.1% to 73.9% (a two-sample proportion test indicated that this difference was statistically significant, 95%CI [-18.4%, -9.9%],  $z = 6.51$ ,  $p < .001$ ) In the US, stated vaccine acceptance (among participants recruited through online panel provider Respondi) fell more than 12 percentage points, from 74.7% to 62.6%, between May and September, 2020 (95%CI [-16.7%, -7.5%],  $z = 5.09$ ,  $p < .001$ ).

[FIGURE 1 HERE]

---

<sup>1</sup> Based on respondents who answered the question. In the Italy sample a number of participants were not presented with these items due to a technical error ( $n = 80$ , 11%). In the remaining samples the average proportion of missing responses for vaccine intention and recommendation items was 1% (see supplementary Table S3 for description of missing data).

Table 1.

Sample demographics and percentage of participants willing to receive a COVID-19 vaccine or to recommend it to vulnerable friends/family.

| Country   | Source   | Date   | N    | M <sub>Age</sub> (SD) | Female (%) | Tertiary Educated (%) | Vaccine acceptance (%) | Vaccine recommendation (%) |
|-----------|----------|--------|------|-----------------------|------------|-----------------------|------------------------|----------------------------|
| Australia | Dynata   | 20-Mar | 700  | 46.3 (16.4)           | 51.0       | 43.4                  | 82.9                   | 88.7                       |
| China*    | Respon   | 09-Apr | 700  | 43.2 (14.3)           | 48.9       | 73.1                  | 85.8                   | 87.4                       |
| Germany   | Respon   | 23-Mar | 700  | 46.6 (16.0)           | 49.9       | 32.7                  | 80.8                   | 89.2                       |
| Spain     | Respon   | 22-Mar | 700  | 46.6 (15.0)           | 51.1       | 58.1                  | 83.6                   | 89.8                       |
| Spain     | Respon   | 06-Mar | 700  | 46.0 (15.0)           | 50.4       | 57.0                  | 79.8                   | 82.5                       |
| France*   | BVA      | 03-Apr | 302  | 48.8 (16.5)           | 52.5       | 71.1                  | 69.7                   | 80.7                       |
| Italy     | Respon   | 22-Mar | 700  | 46.9 (26.1)           | 50.4       | 41.3                  | 85.3                   | 88.2                       |
| Italy     | Respon   | 10-Mar | 690  | 48.1 (16.4)           | 50.9       | 53.3                  | 74.5                   | 80.1                       |
| Japan     | Respon   | 09-Apr | 700  | 45.3 (15.5)           | 49.0       | 70.5                  | 85.6                   | 88.4                       |
| S. Korea  | Respon   | 21-Mar | 693  | 38.4 (14.2)           | 50.5       | 66.4                  | 88.1                   | 90.3                       |
| Mexico    | Respon   | 06-Mar | 700  | 38.7 (14.6)           | 51.0       | 75.8                  | 73.9                   | 75.6                       |
| Mexico    | Respon   | 06-May | 700  | 38.7 (14.6)           | 51.0       | 75.8                  | 73.9                   | 75.6                       |
| Sweden    | Respon   | 28-Mar | 700  | 48.4 (77.3)           | 49.1       | 40.3                  | 66.3                   | 77.2                       |
| Sweden    | Respon   | 17-Apr | 700  | 45.3 (16.7)           | 48.9       | 40.2                  | 63.4                   | 73.7                       |
| UK        | Prolific | 19-Mar | 703  | 45.6 (15.7)           | 50.9       | 53.9                  | 80.4                   | 91.7                       |
| UK        | Prolific | 07-May | 1157 | 45.2 (23.1)           | 50.7       | 56.5                  | 80.4                   | 86.7                       |
| UK        | Prolific | 06-Jun | 1313 | 44.8 (17.5)           | 52.5       | 58.5                  | 78.9                   | 85.3                       |
| UK        | Prolific | 18-Jul | 1838 | 38.1 (15.0)           | 51.2       | 56.2                  | 73.0                   | 79.5                       |
| UK        | Respon   | 07-Sep | 1111 | 45.6 (16.0)           | 52.0       | 43.4                  | 78.9                   | 84.2                       |
| UK        | Respon   | 08-May | 500  | 45.9 (15.9)           | 53.2       | 39.7                  | 79.0                   | 83.2                       |
| UK*       | Respon   | 06-Jun | 1313 | 46.0 (24.4)           | 51.7       | 44.9                  | 80.1                   | 84.4                       |
| UK        | Respon   | 18-Jul | 1818 | 45.7 (19.6)           | 51.6       | 42.6                  | 75.7                   | 79.9                       |
| UK        | Respon   | 29-Sep | 1717 | 47.1 (23.4)           | 52.2       | 42.0                  | 72.2                   | 76.1                       |
| UK        | Prolific | 19-Mar | 700  | 45.1 (15.9)           | 50.6       | 66.8                  | 75.7                   | 85.7                       |
| US        | Respon   | 07-Mar | 700  | 45.7 (26.5)           | 51.0       | 59.3                  | 74.7                   | 80.1                       |
| US        | Respon   | 07-May | 700  | 45.7 (26.5)           | 51.0       | 59.3                  | 74.7                   | 80.1                       |

|     |       |     |    |        |      |      |      |      |
|-----|-------|-----|----|--------|------|------|------|------|
|     | Respo | 28- | 90 | 44.8   |      |      |      |      |
| US* | ndi   | Sep | 9  | (15.6) | 50.6 | 50.1 | 62.6 | 67.5 |

\*Indicates survey that included vaccine acceptance items but not all model predictor variables (excluded from analyses below).

We fitted a logistic regression model to data from each sample to identify the correlates of COVID-19 vaccine intentions. Predictors included: demographic variables; an objective measure of numeracy, political ideology; general social trust; prosociality (willingness to ‘do things for the benefit of others and society’ even at personal cost); general trust in medical and scientific experts; general trust in government; specific trust in politicians to manage the pandemic; specific trust in (separately) national science advisors, independent scientists and the WHO to ‘know the best measures to take in the face of the pandemic’; the perceived efficacy of their own and their country’s actions to limit the spread of the virus; perceived likelihood of infection; and, worry about COVID-19 (for details on measures see Methods section and Table S1; descriptive statistics are reported in Tables S4 and S5, and bivariate correlations in Figure S1). Continuous measures (i.e. all except gender) were scaled and mean centered prior to analysis. Only complete observations were included. Multicollinearity analyses indicated no issues arising from correlated predictors (all variance inflation factor values < 4). To facilitate the interpretation of results we present odds ratios in a heat map format in Figure 2. A full model results including confidence intervals can be found in Tables S6 and S7. Results of models predicting vaccine recommendation responses are also presented in supplementary materials (Figure S2, Tables S8 and S9).

[FIGURE 2 HERE]

Considering the most consistent predictors of stated vaccine acceptance across samples, we find that in most samples individuals who report a higher level of general trust in experts ( $OR_{pooled} = 1.27$ , 95%CI [1.22, 1.33]), or who are more worried about the virus ( $OR_{pooled} = 1.49$ , [1.43, 1.55]), are more likely to say that they would accept a vaccine. In



1  
2  
3 Germany, Spain, Mexico, Sweden (March only), and nearly all UK samples, females are  
4 generally less likely to say that they would accept a COVID-19 vaccine if available ( $OR_{pooled}$   
5 = 0.59, [0.55, 0.64])<sup>2</sup>. We also note that measures of efficacy, both at the personal ( $OR_{pooled}$  =  
6 1.01, [0.97, 1.06]) and country level ( $OR_{pooled}$  = 1.01, [0.96, 1.07]), were not significantly  
7 associated with reported vaccine acceptance in most samples.  
8  
9  
10  
11  
12  
13  
14

15 Our results reveal a great deal of heterogeneity in the relevance of predictors across  
16 countries, but also across time in countries where we conducted multiple surveys. For  
17 example, in the United States only a few consistent predictors emerged. Most notably,  
18 political conservatism was associated with a lower likelihood to accept a COVID-19 vaccine  
19 ( $OR_{USA-Mar}$  = 0.73 [0.57, 0.93];  $OR_{USA-May}$  = 0.75, [0.57, 0.99]) whereas trust in experts  
20 ( $OR_{USA-Mar}$  = 1.53 [1.16, 2.03];  $OR_{USA-May}$  = 1.38, [1.03, 1.84]) and personal worry about  
21 the virus ( $OR_{USA-Mar}$  = 1.48 [1.17, 1.87];  $OR_{USA-May}$  = 1.27, [0.99 – 1.64]) were associated  
22 with increased vaccination intentions. In contrast, in the United Kingdom, additional factors  
23 such as the role of age, gender, and prosociality played a significant role. There was also  
24 variation over time. For example, although political ideology was not a significant predictor  
25 in the UK in May or July, conservatism was associated with lower vaccination intentions  
26 from September onwards (ORs 0.84-.88), which may be related to increased polarization. To  
27 illustrate the increasing strength of the association between political ideology and vaccine  
28 acceptance over time in the UK, in Figure 3 we plot the predicted likelihood of reported  
29 vaccine acceptance across the political spectrum (holding all other predictors constant).  
30  
31  
32  
33  
34  
35  
36  
37  
38  
39  
40  
41  
42  
43  
44  
45  
46  
47  
48  
49

50 [FIGURE 3 HERE]  
51  
52  
53  
54  
55  
56  
57

---

58 <sup>2</sup> UK data was over represented in our pooled sample. As a robustness check we also fitted the model to the  
59 pooled sample with UK data removed and report that the effects of gender, trust in experts and worry remain  
60 significant ( $ps < .001$ ; see Table S6).



1  
2  
3 In the UK, we also report a different pattern of effects when comparing between  
4 samples collected via different providers, even where these were collected on the same day  
5 (in May, July, and September), were matched on age and gender, and controlling for a range  
6 of other demographic variables. This underscores the caution that must be applied when  
7 studies generalize results from a single survey sample (particularly an online survey).  
8  
9

10  
11 In terms of variance explained, the variables in our model explained approximately  
12 10-30% of the variance in the likelihood of vaccine acceptance vs refusal, with the exception  
13 of samples recruited in Korea (4%) and Japan (8%).  
14  
15

### 16 17 18 19 20 21 22 23 24 25 **Accounting for general vaccine attitudes**

26  
27 To examine the extent to which the effects in our model can be accounted for by a  
28 negative perception of vaccines in general, we conducted an additional set of analyses. In our  
29 three most recent UK surveys we included a two-item measure of general vaccine attitudes  
30 (adapted from Lewandowsky et al.[35]). A comparison of results from models with or  
31 without general vaccine attitudes as a predictor is shown as a heat map in Figure 4. Although  
32 attitudes toward vaccination increase the explained variance of our model ( $\Delta R^2$  4%-9%) and  
33 reveal strong significant effects such that more positive attitudes are associated with  
34 increased vaccination intentions (ORs 1.69-2.31; full results in Table S10), the relationships  
35 in the original model appear robust and are only minimally attenuated when accounting for  
36 generalized attitudes.  
37  
38  
39  
40  
41  
42  
43  
44  
45  
46  
47  
48  
49

50  
51 [FIGURE 4 HERE]  
52  
53  
54  
55  
56  
57  
58  
59  
60

## DISCUSSION

Understanding the psychological determinants of vaccine acceptance and hesitancy is crucial during a global pandemic. Across all countries surveyed, between March and September 2020, a substantial proportion of participants (up to 37% in some countries) said that they would *not* accept a hypothetical COVID-19 vaccine. People were slightly more likely to say that they would recommend it to vulnerable friends and family members. Considering who is more or less likely to report willingness to be vaccinated against COVID-19, being male, expressing general trust in those with scientific or medical expertise, and worrying about the virus are the most consistent correlates of vaccine acceptance across our samples. It is important to note that hesitancy about a COVID-19 vaccine is not purely attributable to people's attitudes to vaccines in general. Although (in the UK, where we studied it) negative attitudes towards vaccines in general are a significant and important predictor of COVID-19 vaccine refusal, there are clearly additional factors at play in determining public reactions to a COVID-19 vaccine. This broadly aligns with other research indicating that, for many people, there are concerns specifically around the rapid and novel development processes of COVID-19 vaccines and possible safety issues[29,45]. Our multivariate analyses show that the bulk of the burden of trust rests on science and medicine. Accounting for the other factors in our model, we find that trust in government (both generally and regarding COVID-19) and general social trust (i.e. trust in people) are *not* significantly associated with vaccine acceptance in most of our samples.

The fact that we saw only a weak link between stated vaccine acceptance and our measure of prosociality—along with the fact that higher numbers of people said that they'd recommend the vaccine to a vulnerable friend or relative than say they would accept it themselves—suggests that the prosocial nature of vaccines may not be recognized by many people. Recent experimental research has shown that emphasizing the societal benefits of

1  
2  
3 herd immunity (i.e., the need for those who do not see themselves as personally vulnerable to  
4 take the vaccine in order to provide protection for those who are) may assist uptake[46].  
5  
6  
7

8 The higher reluctance from women to say that they would take a vaccine is in line  
9 with other work focusing on acceptance of a potential COVID-19 vaccine[14,15], and  
10 vaccination generally[22] but has not been adequately explained. Even when general vaccine  
11 beliefs are taken into account, however, the gender bias remains. Qualitative work should  
12 focus on investigating this further, in order to understand the root of women's concerns about  
13 the COVID-19 vaccine. We see very little effect of our measures of personal or governmental  
14 efficacy, but this may be related to the fact that a vaccine against COVID-19 was  
15 hypothetical at the time of the surveys and our measures did not directly ask about  
16 vaccination.  
17  
18  
19  
20  
21  
22  
23  
24  
25  
26  
27  
28  
29

30 Another important finding highlighted by our repeated samples is that vaccine  
31 acceptance appears to be politicized in the US and is becoming so in the UK. Our US results  
32 agree with previous US research focusing on COVID-19 vaccine acceptance[32,47], which  
33 noted that political conservatives are less accepting of potential COVID-19 vaccines. Our UK  
34 results align with those of Maher et al, who, through network analysis, show a pattern of  
35 attitudinal alignment over time in a small UK sample, resulting in the emergence of a  
36 politically conservative faction expressing less trust in scientists, doctors, and vaccines[17].  
37 Although international research has suggested that political conservatism is correlated with  
38 anti-vaccination attitudes globally[33], we did not find that ideology was associated with  
39 vaccine acceptance outside of the US and UK. However most other countries were only  
40 surveyed in earlier stages of the pandemic (i.e. prior to May, 2020) and we can therefore not  
41 say whether they might have followed a similar pattern to the UK as time went on.  
42  
43  
44  
45  
46  
47  
48  
49  
50  
51  
52  
53  
54  
55  
56  
57  
58  
59  
60

1  
2  
3 It is possible that misinformation susceptibility[48,49] and conspiracy thinking[50]  
4  
5 underlie the association between ideology and vaccine attitudes to some extent. For example,  
6  
7 Motta et al.[51] find that far right-wing media outlets have disproportionately spread  
8  
9 misinformation during the early stages of the pandemic. Susceptibility to misinformation  
10  
11 around COVID-19 was also found in prior research to be associated with measures of vaccine  
12  
13 hesitancy[49]. There is already a proliferation of conspiracy theories focused on specific  
14  
15 COVID-19 vaccines[52,53]. It will be important to tackle these pro-actively through  
16  
17 ‘prebunking’ methods to inoculate against misinformation[54,55].  
18  
19  
20  
21

22 Finally, we acknowledge that the heterogeneity in our results across time and  
23  
24 countries highlights the role that (unmeasured) contextual, country-specific factors play in  
25  
26 informing individuals’ vaccination attitudes. As noted by the WHO SAGE working group on  
27  
28 vaccine hesitancy, individual factors such as trust and risk perception intersect with  
29  
30 contextual influences such as culture, media environments, and information from local  
31  
32 leaders[10]. Lastly, our samples were not truly representative of the general population in  
33  
34 each country: although they were quota-balanced on gender and age, the population that  
35  
36 respond to an online questionnaire will differ from the general population on several  
37  
38 significant characteristics. However, the rank ordering of countries on vaccine acceptance in  
39  
40 our study is similar to that of Lazarus et al<sup>10</sup>, which were based on a random stratified  
41  
42 sampling approach using several online panel providers. This gives us some confidence in the  
43  
44 generalizability of our results, and the fact that our samples were generally larger and  
45  
46 included more trust-focused questions makes them useful for exploring these important  
47  
48 predictors of vaccine attitudes.  
49  
50  
51  
52  
53  
54

55 In terms of practical considerations, our finding that trust in scientific and medical  
56  
57 institutions is one of the strongest predictors of vaccine acceptance highlights the need to  
58  
59 work proactively with others from outside of this sphere, such as community and religious  
60

1  
2  
3 leaders[56] to open a two-way conversation with those who distrust the scientific and medical  
4  
5 establishment. Due consideration must also be given to the accessibility[57], format[58,59],  
6  
7 and transparency[60,61] of information provided to the public. Future research should  
8  
9 continue to evaluate how to most effectively communicate evidence about vaccination, and  
10  
11 should seek to more deeply understand the concerns and needs of those who express  
12  
13 hesitancy regarding COVID-19 vaccination. As Bhopal[62], commenting on potential  
14  
15 COVID-19 mass vaccination efforts, writes, “Open, honest, factual and sensitively conducted  
16  
17 public dialogue is now urgent.”  
18  
19  
20  
21  
22  
23  
24

## 25 CONCLUSIONS

26  
27 Countries around the world face a major evidence communication challenge when it  
28  
29 comes to the COVID-19 vaccines that are about to become available. In order to reach a large  
30  
31 enough proportion of the population in each country to achieve herd immunity, it is vital to  
32  
33 increase in the number of people who are willing to take a vaccine. To achieve this, non-  
34  
35 pharmaceutical interventions will need to be deployed[63], such as communicating  
36  
37 trustworthy information about the vaccines via credible sources. In the current research, we  
38  
39 have demonstrated across 12 national samples that people’s level of worry about COVID-19  
40  
41 and their trust in experts and medical and scientific institutions are key determinants of  
42  
43 potential vaccine acceptance. Future research should confirm these findings in experimental  
44  
45 settings. We recommend that empirical studies should continue to be carried out alongside  
46  
47 qualitative work with different communities to get a rounded understanding of people’s  
48  
49 concerns and misunderstandings. Only by knowing these can we adequately address them  
50  
51 and provide people with the information they need to make a decision that will affect not just  
52  
53 their own health, but that of their community as well.  
54  
55  
56  
57  
58  
59  
60

1  
2  
3  
4  
5  
6  
7  
8  
9  
10  
11  
12  
13  
14  
15  
16  
17  
18  
19  
20  
21  
22  
23  
24  
25  
26  
27  
28  
29  
30  
31  
32  
33  
34  
35  
36  
37  
38  
39  
40  
41  
42  
43  
44  
45  
46  
47  
48  
49  
50  
51  
52  
53  
54  
55  
56  
57  
58  
59  
60

For peer review only

## FIGURE LEGENDS

**Figure 1. COVID-19 vaccine acceptance across countries and time.** Percentage of respondents who stated they were willing to receive or recommend a COVID-19 vaccine across surveys. UK and US samples using different panel providers are reported separately.

**Figure 2. Predictors of vaccine acceptance.** Heatmap of odds ratios in logistic regression model predicting stated vaccine acceptance. Columns represent individual samples and rows represent predictors in model. Grey values are non-significant,  $p > .05$ . Red shading indicates a lower likelihood of reported vaccine acceptance and blue shading a higher likelihood. For space, samples are defined by their two character ISO country code and a letter denoting participant source (B, BVA; D, Dynata; R, Respondi; P, Prolific). Political orientation data was not collected in French sample, this sample is excluded from pooled data.

**Figure 3. Political ideology and vaccine acceptance in the UK.** Predicted likelihood that an individual will accept being vaccinated at varying levels of political ideology (1 = very liberal/left wing, 7 = very conservative/right wing) in UK samples over time.

**Figure 4. Negative general attitudes towards vaccination do not fully account for relationships in the model.** Results of logistic regression models predicting reported COVID-19 vaccine acceptance in UK samples, excluding (left panel) or including (right panel) general vaccine attitudes as a predictor. Odds ratios shown are based on scaled predictors (other than gender). Grey values are non-significant,  $p > .05$ . For space, samples are defined by a letter denoting participant source (R, Respondi; P, Prolific).

### Author contributions

Survey instrument development: JRK, CRS, GR, SD, SvdL, ALJF. Study conceptualisation, design and theoretical framing: JRK, SvdL, ALJF. Data collection: JRK, CRS, GR, SD, US, CD, PA, ALJF. Statistical analyses and first draft: JRK, SvdL, ALJF. Manuscript editing, review and approval: JRK, CRS, GR, SD, US, CD, PA, ALJF, SvdL.

### Data availability

The data and analysis code for this study are available at:

[https://osf.io/vgez2/?view\\_only=8fe81f5fe3f345a99b06edeaba6bd9e1](https://osf.io/vgez2/?view_only=8fe81f5fe3f345a99b06edeaba6bd9e1)

### Funding

This study was funded by the Winton Centre for Risk and Evidence Communication which is supported by the David and Claudia Harding Foundation. Award/Grant number is not applicable.

### Competing interests

None declared.

### Acknowledgements

We would like to thank María del Carmen Climent Palmer, Ban Mutsuhisa, Jin Park, and Giulia Luoni for additional translations, the University of Tokyo for their collaboration, and all the participants and those who helped to administer the study.

### Patient and Public Involvement

Patients or the public were not involved in the design, or conduct, or reporting, or dissemination plans of our research.



1  
2  
3  
4  
5  
6  
7  
8  
9  
10  
11  
12  
13  
14  
15  
16  
17  
18  
19  
20  
21  
22  
23  
24  
25  
26  
27  
28  
29  
30  
31  
32  
33  
34  
35  
36  
37  
38  
39  
40  
41  
42  
43  
44  
45  
46  
47  
48  
49  
50  
51  
52  
53  
54  
55  
56  
57  
58  
59  
60

## REFERENCES

- 1 Rodríguez Mega E. COVID has killed more than one million people. How many more will die? *Nature* Published Online First: 30 September 2020. doi:10.1038/d41586-020-02762-y
- 2 International Monetary Fund. World Economic Outlook, October 2020: A Long and Difficult Ascent. Washington, DC: 2020. <https://www.imf.org/en/Publications/WEO/Issues/2020/09/30/world-economic-outlook-october-2020> (accessed 29 Nov 2020).
- 3 Lytras T, Tsiodras S. Lockdowns and the COVID-19 pandemic: What is the endgame? *Scand. J. Public Health*. 2020. doi:10.1177/1403494820961293
- 4 Schoch-Spana M, Brunson EK, Long R, *et al*. The public's role in COVID-19 vaccination: human-centered recommendations to enhance pandemic vaccine awareness, access, and acceptance in the United States. *Vaccine* Published Online First: 29 October 2020. doi:10.1016/j.vaccine.2020.10.059
- 5 Callaway E. What Pfizer's landmark COVID vaccine results mean for the pandemic. *Nature* Published Online First: 9 November 2020. doi:10.1038/d41586-020-03166-8
- 6 Callaway E. COVID vaccine excitement builds as Moderna reports third positive result. *Nature* 2020;**587**:337–8. doi:10.1038/d41586-020-03248-7
- 7 Gomes MGM, Corder R, King J, *et al*. Individual variation in susceptibility or exposure to SARS-CoV-2 lowers the herd immunity threshold. *medRxiv* Published Online First: 21 May 2020. doi:10.1101/2020.04.27.20081893
- 8 Sanche S, Lin YT, Xu C, *et al*. High Contagiousness and Rapid Spread of Severe Acute Respiratory Syndrome Coronavirus 2. *Emerg Infect Dis* 2020;**26**:1470–7. doi:10.3201/eid2607.200282
- 9 Fontanet A, Cauchemez S. COVID-19 herd immunity: where are we? *Nat Rev Immunol* 2020;**20**:583–4. doi:10.1038/s41577-020-00451-5
- 10 WHO. Report of the Sage Working Group on Vaccine Hesitancy. 2014. [https://www.who.int/immunization/sage/meetings/2014/october/1\\_Report\\_WORKING\\_GROUP\\_vaccine\\_hesitancy\\_final.pdf](https://www.who.int/immunization/sage/meetings/2014/october/1_Report_WORKING_GROUP_vaccine_hesitancy_final.pdf) (accessed 23 Nov 2020).
- 11 WHO. Ten threats to global health in 2019. 2019. <https://www.who.int/news-room/spotlight/ten-threats-to-global-health-in-2019> (accessed 20 Nov 2020).
- 12 Verger P, Dubé E. Restoring confidence in vaccines in the COVID-19 era. *Expert Rev. Vaccines*. 2020. doi:10.1080/14760584.2020.1825945
- 13 Mesch GS, Schwirian KP. Social and political determinants of vaccine hesitancy: Lessons learned from the H1N1 pandemic of 2009-2010. *Am J Infect Control* 2015;**43**:1161–5. doi:10.1016/j.ajic.2015.06.031
- 14 Lazarus J V., Ratzan SC, Palayew A, *et al*. A global survey of potential acceptance of a COVID-19 vaccine. *Nat Med* Published Online First: 20 October 2020. doi:10.1038/s41591-020-1124-9
- 15 Wang J, Jing R, Lai X, *et al*. Acceptance of COVID-19 Vaccination during the COVID-19 Pandemic in China. *Vaccines* 2020;**8**:482. doi:10.3390/vaccines8030482
- 16 Frank K, Arim R. Canadians' willingness to get a COVID-19 vaccine when one becomes available: What role does trust play? *Stat. Canada*.

2020. <https://www150.statcan.gc.ca/n1/pub/45-28-0001/2020001/article/00043-eng.htm> (accessed 22 Nov 2020).
- 17 Maher PJ, MacCarron P, Quayle M. Mapping public health responses with attitude networks: the emergence of opinion-based groups in the UK's early COVID-19 response phase. *Br J Soc Psychol* 2020;**59**:641–52. doi:10.1111/bjso.12396
- 18 Padhi BK, Almohaithef M. Determinants of COVID-19 vaccine acceptance in Saudi Arabia: a web-based national survey. *medRxiv* 2020;:2020.05.27.20114413. doi:10.1101/2020.05.27.20114413
- 19 Soveri A, Karlsson LC, Antfolk J, *et al.* Unwillingness to engage in behaviors that protect against COVID-19: Conspiracy, trust, reactance, and endorsement of complementary and alternative medicine. doi:10.31234/OSF.IO/MHCTF
- 20 Palamenghi L, Barello S, Boccia S, *et al.* Mistrust in biomedical research and vaccine hesitancy: the forefront challenge in the battle against COVID-19 in Italy. *Eur J Epidemiol* 2020;**35**:785–8. doi:10.1007/s10654-020-00675-8
- 21 Larson HJ, Cooper LZ, Eskola J, *et al.* Addressing the vaccine confidence gap. *Lancet*. 2011;**378**:526–35. doi:10.1016/S0140-6736(11)60678-8
- 22 de Figueiredo A, Simas C, Karafillakis E, *et al.* Mapping global trends in vaccine confidence and investigating barriers to vaccine uptake: a large-scale retrospective temporal modelling study. *Lancet* 2020;**396**:898–908. doi:10.1016/S0140-6736(20)31558-0
- 23 National Academies of Sciences, Medicine, and Engineering. Trust and Confidence at the Interfaces of the Life Sciences and Society. A Workshop Summary. Washington, DC: 2015. <https://www.nap.edu/read/21798>
- 24 Hartman RO, Dieckmann NF, Sprenger AM, *et al.* Modeling attitudes toward science: Development and validation of the credibility of science scale. *Basic Appl Soc Psych* 2017;**39**:358–71. doi:10.1080/01973533.2017.1372284
- 25 Brewer PR, Ley BL. Whose science do you believe? Explaining trust in sources of scientific information about the environment. *Sci Commun* 2013;**35**:115–37. doi:10.1177/1075547012441691
- 26 Becker MH. The Health Belief Model and Sick Role Behavior. *Health Educ Monogr* 1974;**2**:409–19. doi:10.1177/109019817400200407
- 27 Rogers RW. A Protection Motivation Theory of Fear Appeals and Attitude Change. *J Psychol* 1975;**91**:93–114. doi:10.1080/00223980.1975.9915803
- 28 Ling M, Kothe EJ, Mullan BA. Predicting intention to receive a seasonal influenza vaccination using Protection Motivation Theory. *Soc Sci Med* 2019;**233**:87–92. doi:10.1016/j.socscimed.2019.06.002
- 29 Dror AA, Eisenbach N, Taiber S, *et al.* Vaccine hesitancy: the next challenge in the fight against COVID-19. *Eur J Epidemiol* 2020;**35**:775–9. doi:10.1007/s10654-020-00671-y
- 30 Kelly B, Bann C, Squiers L, *et al.* Predicting willingness to vaccinate for COVID-19 in the US. *JCH Impact*. 2020. <https://jhcimpact.com/posts/f/predicting-willingness-to-vaccinate-for-covid-19-in-the-us> (accessed 22 Nov 2020).
- 31 Wong LP, Alias H, Wong P-F, *et al.* The use of the health belief model to assess predictors of intent to receive the COVID-19 vaccine and willingness to pay. *Hum Vaccin Immunother* 2020;**16**:2204–14. doi:10.1080/21645515.2020.1790279
- 32 Kreps S, Prasad S, Brownstein JS, *et al.* Factors Associated With US Adults' Likelihood of Accepting COVID-19 Vaccination. *JAMA Netw open* 2020;**3**:e2025594.

- doi:10.1001/jamanetworkopen.2020.25594
- 33 Hornsey MJ, Harris EA, Fielding KS. The Psychological Roots of Anti-Vaccination Attitudes: A 24-Nation Investigation. *Heal Psychol* 2018;**37**:307–15. doi:10.1037/hea0000586.supp
- 34 Hornsey MJ, Finlayson M, Chatwood G, *et al.* Donald Trump and vaccination: The effect of political identity, conspiracist ideation and presidential tweets on vaccine hesitancy. *J Exp Soc Psychol* 2020;**88**:103947. doi:10.1016/j.jesp.2019.103947
- 35 Lewandowsky S, Gignac GE, Oberauer K. The role of conspiracist ideation and worldviews in predicting rejection of science. *PLoS One* 2013;**8**:e75637. doi:10.1371/journal.pone.0075637
- 36 Reyna VF, Nelson WL, Han PK, *et al.* How Numeracy Influences Risk Comprehension and Medical Decision Making. *Psychol Bull* 2009;**135**:943–73. doi:10.1037/a0017327
- 37 Betsch C, Schmid P, Heinemeier D, *et al.* Beyond confidence: Development of a measure assessing the 5C psychological antecedents of vaccination. *PLoS One* 2018;**13**:e0208601. doi:10.1371/journal.pone.0208601
- 38 Jang WM, Kim UN, Jang DH, *et al.* Influence of trust on two different risk perceptions as an affective and cognitive dimension during Middle East respiratory syndrome coronavirus (MERS-CoV) outbreak in South Korea: Serial cross-sectional surveys. *BMJ Open* 2020;**10**:33026. doi:10.1136/bmjopen-2019-033026
- 39 Prolific. Representative Samples on Prolific. <https://researcher-help.prolific.co/hc/en-gb/articles/360019236753-Representative-Samples-on-Prolific> (accessed 19 Oct 2020).
- 40 Cokely ET, Galesic M, Schulz E, *et al.* Measuring risk literacy: The Berlin Numeracy Test. *Judgm Decis Mak* 2012;**7**:25–47.
- 41 Lipkus IM, Samsa G, Rimer BK. General performance on a numeracy scale among highly educated samples. *Med Decis Mak* 2001;**21**:37–44. doi:10.1177/0272989X0102100105
- 42 Lundmark S, Gilljam M, Dahlberg S. Measuring Generalized Trust. *Public Opin. Q.* 2016;**80**:26–43. doi:10.1093/poq/nfv042
- 43 Fischer R, Karl JA. A Primer to (Cross-Cultural) Multi-Group Invariance Testing Possibilities in R. *Front Psychol* 2019;**10**:1507. doi:10.3389/fpsyg.2019.01507
- 44 Rutkowski L, Svetina D. Assessing the Hypothesis of Measurement Invariance in the Context of Large-Scale International Surveys. *Educ Psychol Meas* 2014;**74**:31–57. doi:10.1177/0013164413498257
- 45 Campbell D. Protecting others and record of vaccines main reasons to get Covid jab, poll shows. *Guardian*. 2020.<https://www.theguardian.com/society/2020/nov/30/covid-protecting-others-and-record-of-vaccines-main-reasons-to-get-jab>
- 46 Betsch C, Böhm R, Korn L, *et al.* On the benefits of explaining herd immunity in vaccine advocacy. *Nat Hum Behav* 2017;**1**:0056. doi:10.1038/s41562-017-0056
- 47 Carpiano RM. Demographic differences in US adult intentions to receive a potential coronavirus vaccine and implications for ongoing study. doi:10.1101/2020.09.07.20190058
- 48 Calvillo DP, Ross BJ, Garcia RJB, *et al.* Political Ideology Predicts Perceptions of the Threat of COVID-19 (and Susceptibility to Fake News About It). *Soc Psychol Personal Sci* 2020;**11**:1119–28. doi:10.1177/1948550620940539
- 49 Roozenbeek J, Schneider CR, Dryhurst S, *et al.* Susceptibility to misinformation about COVID-19 around the world. *R Soc Open Sci* 2020;**7**:201199. doi:10.1098/rsos.201199
- 50 Linden S, Panagopoulos C, Azevedo F, *et al.* The Paranoid Style in American Politics

- 1  
2  
3 Revisited: An Ideological Asymmetry in Conspiratorial Thinking. *Polit Psychol*  
4 2020;:pops.12681. doi:10.1111/pops.12681  
5
- 6 51 Motta M, Stecula D, Farhart C. How right-leaning media coverage of Covid-19 facilitated the  
7 spread of misinformation in the early stages of the pandemic in the U.S. *Can J Polit Sci*  
8 2020;**53**:335–42. doi:10.1017/S0008423920000396  
9
- 10 52 Reuters. Fact check: Dr. Fauci was not the first CEO and other false claims about biotech  
11 company Moderna. Reuters. 2020.[https://uk.reuters.com/article/uk-factcheck-moderna-fauci-](https://uk.reuters.com/article/uk-factcheck-moderna-fauci-gates/fact-check-dr-fauci-was-not-the-first-ceo-and-other-false-claims-about-biotech-company-moderna-idUSKBN25S5GD)  
12 [gates/fact-check-dr-fauci-was-not-the-first-ceo-and-other-false-claims-about-biotech-](https://uk.reuters.com/article/uk-factcheck-moderna-fauci-gates/fact-check-dr-fauci-was-not-the-first-ceo-and-other-false-claims-about-biotech-company-moderna-idUSKBN25S5GD)  
13 [company-moderna-idUSKBN25S5GD](https://uk.reuters.com/article/uk-factcheck-moderna-fauci-gates/fact-check-dr-fauci-was-not-the-first-ceo-and-other-false-claims-about-biotech-company-moderna-idUSKBN25S5GD) (accessed 23 Nov 2020).  
14
- 15 53 May L. Antivaxxers share conspiracy theories after Pfizer announcement. Dly. Mail.  
16 2020.[https://www.dailymail.co.uk/news/article-8934447/Antivaxxers-share-conspiracy-](https://www.dailymail.co.uk/news/article-8934447/Antivaxxers-share-conspiracy-theories-Pfizer-announcement.html)  
17 [theories-Pfizer-announcement.html](https://www.dailymail.co.uk/news/article-8934447/Antivaxxers-share-conspiracy-theories-Pfizer-announcement.html) (accessed 23 Nov 2020).  
18
- 19 54 Roozenbeek J, van der Linden S, Nygren T. Prebunking interventions based on ‘inoculation’  
20 theory can reduce susceptibility to misinformation across cultures. *Harvard Kennedy Sch*  
21 *Misinformation Rev* 2020;**1**. doi:10.37016//mr-2020-008  
22
- 23 55 Jolley D, Douglas KM. Prevention is better than cure: Addressing anti-vaccine conspiracy  
24 theories. *J Appl Soc Psychol* 2017;**47**:459–69. doi:10.1111/jasp.12453  
25
- 26 56 Jarrett C, Wilson R, O’Leary M, *et al*. Strategies for addressing vaccine hesitancy – A  
27 systematic review. *Vaccine* 2015;**33**:4180–90. doi:10.1016/j.vaccine.2015.04.040  
28
- 29 57 O’Neill O. Accountability, trust and informed consent in medical practice and research. *Clin*  
30 *Med J R Coll Physicians London* 2004;**4**:269–76. doi:10.7861/clinmedicine.4-3-269  
31
- 32 58 Schwartz LM, Woloshin S, Welch HG. Using a Drug Facts Box to Communicate Drug  
33 Benefits and Harms. *Ann Intern Med* 2009;**150**:516–27.  
34
- 35 59 Brick C, McDowell M, Freeman ALJ. Risk communication in tables versus text: A registered  
36 report randomized trial on ‘fact boxes’. *R Soc Open Sci* 2020;**7**. doi:10.1098/rsos.190876  
37
- 38 60 Blastland M, Freeman ALJ, van der Linden S, *et al*. Five rules for evidence communication.  
39 *Nature* 2020;**587**:362–4. doi:10.1038/d41586-020-03189-1  
40
- 41 61 van der Bles AM, van der Linden S, Freeman ALJ, *et al*. The effects of communicating  
42 uncertainty on public trust in facts and numbers. 2020.  
43
- 44 62 Bhopal RS. COVID-19 zugzwang: Potential public health moves towards population (herd)  
45 immunity. *Public Heal Pract* 2020;**1**:100031. doi:10.1016/j.puhip.2020.100031  
46
- 47 63 van Bavel JJ, Baicker K, Boggio PS, *et al*. Using social and behavioural science to support  
48 COVID-19 pandemic response. *Nat. Hum. Behav.* 2020;**4**:460–71. doi:10.1038/s41562-020-  
49 0884-z  
50  
51  
52  
53  
54  
55  
56  
57  
58  
59  
60

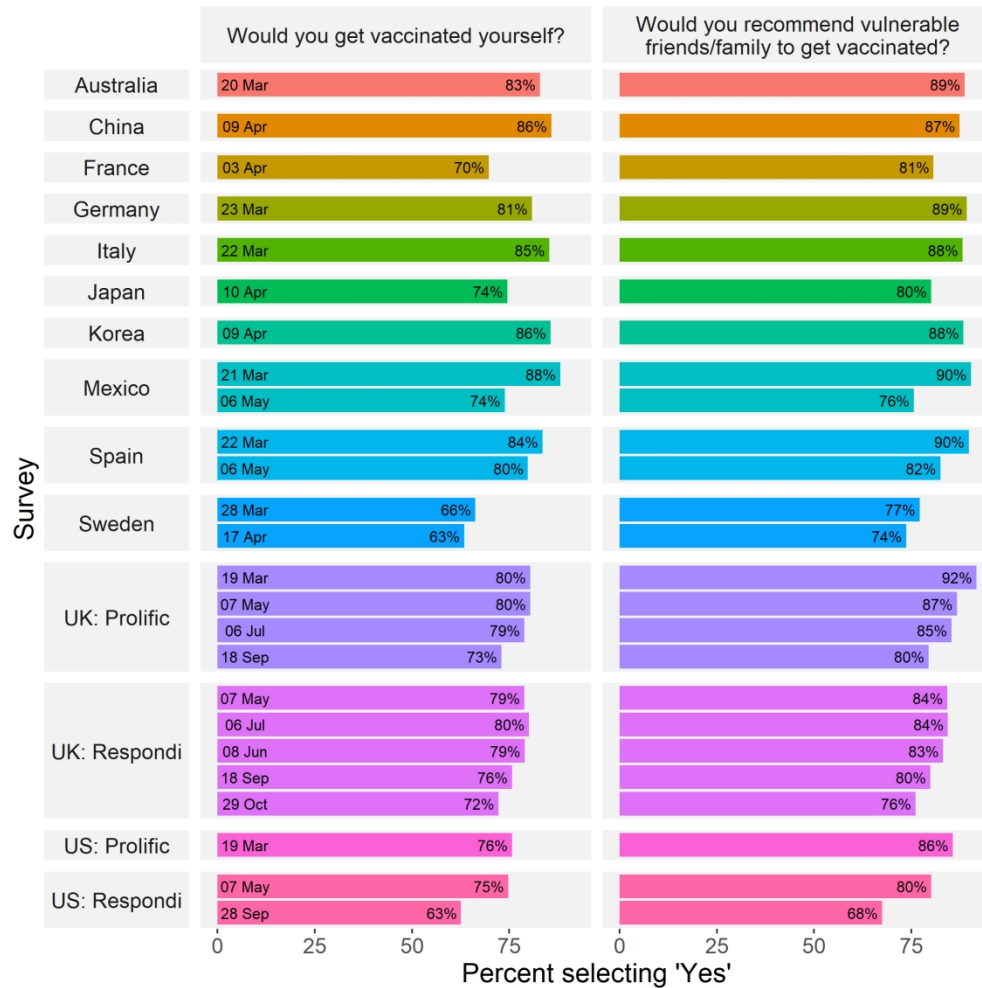

Figure 1. COVID-19 vaccine acceptance across countries and time. Percentage of respondents who stated they were willing to receive or recommend a COVID-19 vaccine across surveys. UK and US samples using different panel providers are reported separately

199x199mm (300 x 300 DPI)



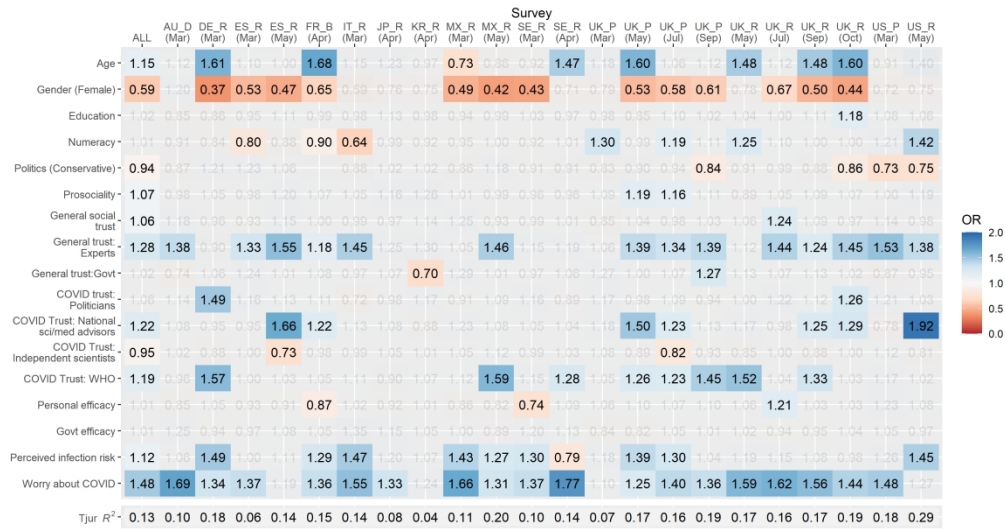

Figure 2. Predictors of vaccine acceptance. Heatmap of odds ratios in logistic regression model predicting stated vaccine acceptance. Columns represent individual samples and rows represent predictors in model. Grey values are non-significant,  $p > .05$ . Red shading indicates a lower likelihood of reported vaccine acceptance and blue shading a higher likelihood. For space, samples are defined by their two character ISO country code and a letter denoting participant source (B, BVA; D, Dynata; R, Respondi; P, Prolific). Political orientation data was not collected in French sample, this sample is excluded from pooled data.

299x159mm (300 x 300 DPI)

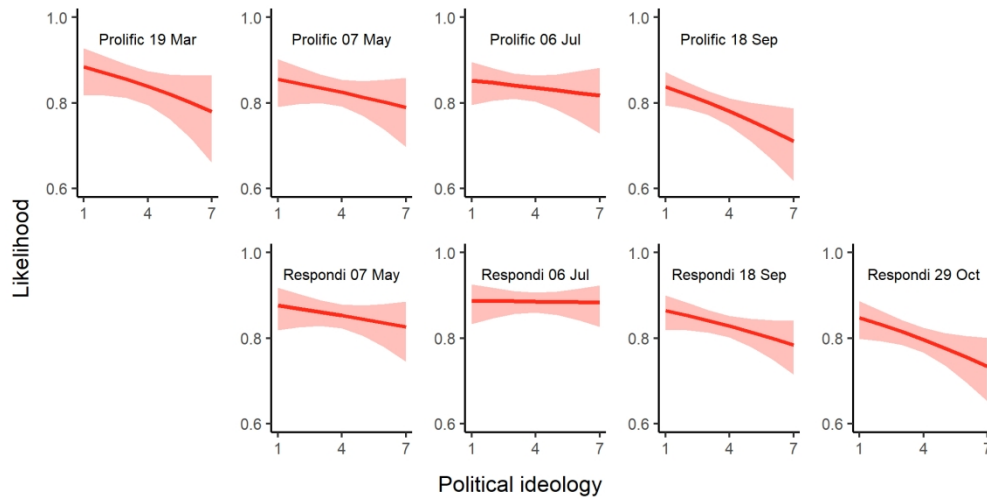

Figure 3. Political ideology and vaccine acceptance in the UK. Predicted likelihood that an individual will accept being vaccinated at varying levels of political ideology (1 = very liberal/left wing, 7 = very conservative/right wing) in UK samples over time.

177x88mm (300 x 300 DPI)

1  
2  
3  
4  
5  
6  
7  
8  
9  
10  
11  
12  
13  
14  
15  
16  
17  
18  
19  
20  
21  
22  
23  
24  
25  
26  
27  
28  
29  
30  
31  
32  
33  
34  
35  
36  
37  
38  
39  
40  
41  
42  
43  
44  
45  
46  
47  
48  
49  
50  
51  
52  
53  
54  
55  
56  
57  
58  
59  
60

|                                        | Base model |            |            | Including general vaccine attitudes |            |            |
|----------------------------------------|------------|------------|------------|-------------------------------------|------------|------------|
|                                        | UK_P (Sep) | UK_R (Sep) | UK_R (Oct) | UK_P (Sep)                          | UK_R (Sep) | UK_R (Oct) |
| Age                                    | 1.12       | 1.48       | 1.60       | 1.16                                | 1.40       | 1.41       |
| Gender (Female)                        | 0.61       | 0.50       | 0.44       | 0.62                                | 0.49       | 0.44       |
| Education                              | 1.02       | 1.11       | 1.18       | 1.00                                | 1.07       | 1.15       |
| Numeracy                               | 1.11       | 1.00       | 1.00       | 1.05                                | 0.93       | 0.87       |
| Politics (Conservative)                | 0.84       | 0.88       | 0.86       | 0.85                                | 0.86       | 0.84       |
| Prosociality                           | 1.11       | 1.09       | 1.07       | 1.10                                | 1.08       | 1.04       |
| General social trust                   | 1.03       | 1.09       | 0.97       | 1.03                                | 1.04       | 0.96       |
| General trust: Experts                 | 1.39       | 1.24       | 1.45       | 1.29                                | 1.11       | 1.29       |
| General trust: Govt                    | 1.27       | 1.13       | 1.02       | 1.24                                | 1.15       | 0.98       |
| COVID trust: Politicians               | 0.94       | 1.12       | 1.26       | 0.95                                | 1.18       | 1.37       |
| COVID Trust: National sci/med advisors | 1.13       | 1.25       | 1.29       | 1.11                                | 1.14       | 1.21       |
| COVID Trust: Independent scientists    | 0.93       | 0.88       | 1.00       | 0.95                                | 0.89       | 0.96       |
| COVID Trust: WHO                       | 1.45       | 1.33       | 1.03       | 1.41                                | 1.33       | 1.02       |
| Personal efficacy                      | 1.10       | 1.03       | 1.03       | 1.06                                | 1.00       | 0.98       |
| Govt efficacy                          | 1.01       | 0.95       | 1.04       | 1.01                                | 0.95       | 1.08       |
| Perceived infection risk               | 1.04       | 1.08       | 0.98       | 1.02                                | 1.12       | 0.96       |
| Worry about COVID                      | 1.36       | 1.56       | 1.44       | 1.36                                | 1.46       | 1.41       |
| General vaccine attitudes              |            |            |            | 1.69                                | 2.10       | 2.31       |
| Tjur R <sup>2</sup>                    | 0.19       | 0.17       | 0.19       | 0.23                                | 0.25       | 0.28       |

Figure 4. Negative general attitudes towards vaccination do not fully account for relationships in the model. Results of logistic regression models predicting reported COVID-19 vaccine acceptance in UK samples, excluding (left panel) or including (right panel) general vaccine attitudes as a predictor. Odds ratios shown are based on scaled predictors (other than gender). Grey values are non-significant,  $p > .05$ . For space, samples are defined by a letter denoting participant source (R, Respondi; P, Prolific).

159x149mm (300 x 300 DPI)



## Predictors of COVID-19 vaccine acceptance across time and countries

### Supplementary material

Table S1

#### Survey items and wording

| Variable                     | Wording                                                                                                                                       | Response                                                                                                                                                                                                                                                                                                                                                                                                                                        |
|------------------------------|-----------------------------------------------------------------------------------------------------------------------------------------------|-------------------------------------------------------------------------------------------------------------------------------------------------------------------------------------------------------------------------------------------------------------------------------------------------------------------------------------------------------------------------------------------------------------------------------------------------|
| Gender                       | What is your gender?                                                                                                                          | 0 =Male, 1= Female                                                                                                                                                                                                                                                                                                                                                                                                                              |
| Age                          | What is your age?                                                                                                                             | Age in years                                                                                                                                                                                                                                                                                                                                                                                                                                    |
| Education                    | Please indicate your highest educational qualification                                                                                        | 1 = No formal education above age 16, 2 = Professional or technical qualifications above age 16, 3 = School education up to age 18, 4 =Degree (Bachelors) or equivalent, 5 = Degree (Masters) or other postgraduate qualification, 6 = Doctorate<br>[In France] 1 = No diploma, 2 =Primary school certificate, 3 = BEPC - Brevet des colleges, 4 = CAP / BEP, 5 = BAC / professional certificate / technical certificate, 6 = BAC +2 and above. |
| Numeracy (summed; range 1-5) | Adaptive Berlin Numeracy test (2-3items, see Cokely et al., 2012 for details).<br>Which represents the highest risk of something happening?   | Scores range 1-4<br>1 = '1 in 10' (correct), 2 = '1 in 1000', 3 = '1 in 100'                                                                                                                                                                                                                                                                                                                                                                    |
| Politics                     | Where do you feel your political views lie on a spectrum of left wing (or liberal) to right wing (or conservative)?                           | 1 = Very liberal/left, 7 = Very conservative/right                                                                                                                                                                                                                                                                                                                                                                                              |
| Prosociality                 | To what extent do you think it's important to do things for the benefit of others and society even if they have some costs to you personally? | 1 = Not at all, 7 = Very much so                                                                                                                                                                                                                                                                                                                                                                                                                |
| General social trust         | Generally speaking, would you say most people can be trusted, or that you can't be too careful in dealing with people?                        | 1 = Can't be too careful, 7 = Most people can be trusted                                                                                                                                                                                                                                                                                                                                                                                        |

|    |                                        |                                                      |                                                    |
|----|----------------------------------------|------------------------------------------------------|----------------------------------------------------|
| 1  |                                        |                                                      |                                                    |
| 2  |                                        |                                                      |                                                    |
| 3  | General trust: Experts (scale)         | How much do you trust each of the following? -       | 1 = Cannot be trusted at all, 5 = Can be trusted a |
| 4  |                                        | Medical doctors and nurses                           | lot                                                |
| 5  |                                        | How much do you trust each of the following? -       | 1 = Cannot be trusted at all, 5 = Can be trusted a |
| 6  |                                        | Scientists                                           | lot                                                |
| 7  |                                        | How much do you trust each of the following? -       | 1 = Cannot be trusted at all, 5 = Can be trusted a |
| 8  |                                        | Scientific knowledge                                 | lot                                                |
| 9  | General trust: Govt (scale)            | How much do you trust each of the following? -       | 1 = Cannot be trusted at all, 5 = Can be trusted a |
| 10 |                                        | Civil servants or public officials in the country    | lot                                                |
| 11 |                                        | you are living in                                    |                                                    |
| 12 |                                        | How much do you trust each of the following? -       | 1 = Cannot be trusted at all, 5 = Can be trusted a |
| 13 |                                        | The current government of the country you are        | lot                                                |
| 14 |                                        | living in                                            |                                                    |
| 15 |                                        | How much do you trust each of the following? -       | 1 = Cannot be trusted at all, 5 = Can be trusted a |
| 16 |                                        | Politicians in the country you are living in         | lot                                                |
| 17 | COVID trust: Politicians               | How much do you trust the country's politicians      | 1 = Not at all, 7 = Very much                      |
| 18 |                                        | to deal effectively with the pandemic?               |                                                    |
| 19 | COVID Trust: National sci/med advisors | How much do you trust the country's national         | 1 = Not at all, 7 = Very much                      |
| 20 |                                        | scientific and medical advisors to know the best     |                                                    |
| 21 |                                        | measures to take in the face of the pandemic?        |                                                    |
| 22 | COVID Trust: Independent scientists    | How much do you trust experts who are not            | 1 = Not at all, 7 = Very much                      |
| 23 |                                        | connected with the government who are                |                                                    |
| 24 |                                        | commenting on measures planned for the               |                                                    |
| 25 |                                        | pandemic?                                            |                                                    |
| 26 | COVID Trust: WHO                       | How much do you trust the World Health               | 1 = Not at all, 7 = Very much                      |
| 27 |                                        | Organisation to know the best measures to take in    |                                                    |
| 28 |                                        | the face of the pandemic?                            |                                                    |
| 29 | Personal efficacy                      | To what extent do you feel that the personal         | 1 = Not at all, 7 = Very much                      |
| 30 |                                        | actions you are taking to try to limit the spread of |                                                    |
| 31 |                                        | coronavirus make a difference?                       |                                                    |
| 32 | Govt efficacy                          | To what extent do you feel the actions that your     | 1 = Not at all, 7 = Very much                      |
| 33 |                                        | country is taking to limit the spread of             |                                                    |
| 34 |                                        | coronavirus make a difference?                       |                                                    |
| 35 | Perceived infection risk (scale)       | How likely do you think it is that you will be       | 1 = Not at all likely, 7 = Very likely             |
| 36 |                                        | directly and personally affected by the following    |                                                    |
| 37 |                                        |                                                      |                                                    |
| 38 |                                        |                                                      |                                                    |
| 39 |                                        |                                                      |                                                    |
| 40 |                                        |                                                      |                                                    |
| 41 |                                        |                                                      |                                                    |
| 42 |                                        |                                                      |                                                    |
| 43 |                                        |                                                      |                                                    |
| 44 |                                        |                                                      |                                                    |
| 45 |                                        |                                                      |                                                    |
| 46 |                                        |                                                      |                                                    |

1  
2  
3  
4  
5  
6  
7  
8  
9  
10  
11  
12  
13  
14  
15  
16  
17  
18  
19  
20  
21  
22  
23  
24  
25  
26  
27  
28  
29  
30  
31  
32  
33  
34  
35  
36  
37  
38  
39  
40  
41  
42  
43  
44  
45  
46

|                               |                                                                                                                                                                                                                   |                                                      |
|-------------------------------|-------------------------------------------------------------------------------------------------------------------------------------------------------------------------------------------------------------------|------------------------------------------------------|
|                               | in the next 6 months? - Catching the coronavirus/COVID-19                                                                                                                                                         |                                                      |
|                               | How likely do you think it is that your friends and family in the country you are currently living in will be directly affected by the following in the next 6 months? - Catching the coronavirus/COVID-19        | 1= Not at all likely, 7 = Very likely                |
|                               | How much do you agree or disagree with the following statements? - I will probably get sick with the coronavirus/COVID-19.                                                                                        | 1 = Strongly disagree, 5 = Strongly agree (rescaled) |
| Worry about COVID             | How worried are you personally about the following issues at present? - Coronavirus/COVID-19                                                                                                                      | 1 = Not at all worried, 7 = Very worried             |
| Vaccine - acceptance          | If a vaccine were to be available for the coronavirus/COVID-19 now: - Would you get vaccinated yourself?                                                                                                          | 0 = No, 1 = Yes                                      |
| Vaccine – recommend to others | If a vaccine were to be available for the coronavirus/COVID-19 now: - Would you recommend vulnerable friends/family to get vaccinated?                                                                            | 0 = No, 1 = Yes                                      |
| General vaccine attitudes     | Please let us know how much you agree or disagree with the following statements about vaccines in general: - I believe that vaccines are a safe and reliable way to help avert the spread of preventable diseases | 1 = Strongly disagree, 5 = Strongly agree            |
|                               | Please let us know how much you agree or disagree with the following statements about vaccines in general: - Vaccinations are one of the most significant contributions to public health                          | 1 = Strongly disagree, 5 = Strongly agree            |

Table S2

## Results of measurement invariance analyses

| Model                             | Constraints      | Df | $\chi^2$ | $\Delta\chi^2$ | $\Delta Df$ | CFI   | RMSEA | SRMR  | $\Delta CFI$ | $\Delta RMSEA$ | $\Delta SRMR$ |
|-----------------------------------|------------------|----|----------|----------------|-------------|-------|-------|-------|--------------|----------------|---------------|
| Trust in experts                  | Configural model | 0  | 0        | -              | -           | 1     | 0     | 0     | -            | -              | -             |
|                                   | Loadings         | 18 | 74.49    | 74.49***       | 18          | 0.998 | 0.039 | 0.017 | 0.002        | 0.039          | 0.017         |
|                                   | Intercepts       | 36 | 488.11   | 413.62***      | 18          | 0.981 | 0.079 | 0.035 | 0.017        | 0.039          | 0.018         |
|                                   | Means            | 45 | 983.43   | 495.32***      | 9           | 0.960 | 0.102 | 0.067 | 0.021        | 0.023          | 0.032         |
| Trust in government               | Configural model | 0  | 0        | -              | -           | 1     | 0     | 0     | -            | -              | -             |
|                                   | Loadings         | 18 | 447.63   | 447.63***      | 18          | 0.981 | 0.109 | 0.049 | 0.019        | 0.109          | 0.049         |
|                                   | Intercepts       | 36 | 1628.51  | 1180.88***     | 18          | 0.931 | 0.148 | 0.070 | 0.051        | 0.039          | 0.020         |
|                                   | Means            | 45 | 2318.57  | 690.06***      | 9           | 0.901 | 0.158 | 0.104 | 0.030        | 0.010          | 0.035         |
| Perceived likelihood of infection | Configural model | 0  | 0        | -              | -           | 1     | 0     | 0     | -            | -              | -             |
|                                   | Loadings         | 18 | 124.79   | 124.79***      | 18          | 0.996 | 0.054 | 0.018 | 0.004        | 0.054          | 0.018         |
|                                   | Intercepts       | 36 | 826.98   | 702.19***      | 18          | 0.968 | 0.104 | 0.047 | 0.028        | 0.050          | 0.028         |
|                                   | Means            | 45 | 1036.54  | 209.56***      | 9           | 0.960 | 0.105 | 0.061 | 0.008        | 0.000          | 0.015         |

\*\*\* $p < .001$ , chi-square difference test

Table S3

Percentage of missing values for predictor and outcome variables across all samples.

| Variable                                     | AU_D<br>(Mar) | CN_R<br>(Apr) | DE_R<br>(Mar) | ES_R<br>(Mar) | ES_R<br>(May) | FR_B<br>(Apr) | IT_R<br>(Mar) | JP_R<br>(Apr) | KR_R<br>(Apr) | MX_R<br>(Mar) | MX_R<br>(May) | SE_R<br>(Apr) | SE_R<br>(Mar) | UK_<br>P<br>(Jul) | UK_P<br>(Mar) | UK_P<br>(May) | UK_P<br>(Sep) | UK_<br>R<br>(Jul) | UK_R<br>(Jun) | UK_R<br>(May) | UK_R<br>(Oct) | UK_R<br>(Sep) | US_P<br>(Mar) | US_R<br>(May) | US_R<br>(Sep) |
|----------------------------------------------|---------------|---------------|---------------|---------------|---------------|---------------|---------------|---------------|---------------|---------------|---------------|---------------|---------------|-------------------|---------------|---------------|---------------|-------------------|---------------|---------------|---------------|---------------|---------------|---------------|---------------|
| Age                                          | 5.4           | 0.6           | 3.6           | 2.0           | 1.6           | 0.0           | 20.6          | 2.3           | 0.4           | 7.9           | 0.9           | 1.3           | 4.4           | 0.0               | 0.0           | 0.2           | 0.0           | 1.4               | 1.2           | 1.2           | 0.9           | 1.4           | 0.0           | 0.9           | 0.0           |
| Gender [Female]                              | 0.0           | 0.0           | 0.0           | 0.0           | 0.0           | 0.0           | 0.0           | 0.0           | 0.0           | 0.0           | 0.0           | 0.0           | 0.0           | 0.5               | 0.4           | 0.3           | 0.6           | 0.0               | 0.0           | 0.0           | 0.0           | 0.0           | 0.4           | 0.0           | 0.1           |
| Education                                    | 5.6           | 0.3           | 3.9           | 1.7           | 0.6           | 0.0           | 20.1          | 1.0           | 0.3           | 7.8           | 0.3           | 0.4           | 3.9           | 0.0               | 0.0           | 0.0           | 0.0           | 0.5               | -             | 0.1           | 0.1           | 0.5           | 0.0           | 0.3           | -             |
| Numeracy                                     | 6.7           | 1.9           | 6.6           | 3.1           | 2.7           | 1.1           | 21.1          | 6.2           | 2.0           | 8.1           | 0.3           | 3.1           | 5.6           | 0.1               | 0.1           | 0.3           | 0.2           | 3.5               | 2.2           | 1.8           | 0.9           | 2.3           | 0.1           | 1.4           | 0.2           |
| Politics<br>[Conservative]                   | 5.6           | -             | 4.1           | 2.1           | 0.6           | -             | 20.3          | 9.2           | 0.1           | 7.9           | 0.9           | 0.9           | 4.1           | 0.1               | 0.0           | 0.1           | 0.1           | 0.6               | 1.2           | 0.3           | 0.3           | 0.8           | 0.0           | 0.4           | 0.2           |
| Prosociality                                 | 1.0           | 0.1           | 0.3           | 0.7           | 0.1           | 0.0           | 1.7           | 0.0           | 0.1           | 0.7           | 0.0           | 0.0           | 0.7           | 0.0               | 0.0           | 0.0           | 0.0           | 0.5               | 0.0           | 0.6           | 0.1           | 0.2           | 0.0           | 0.1           | 0.0           |
| General social trust                         | 0.0           | 0.0           | 0.1           | 0.3           | 0.3           | 0.0           | 0.4           | 0.0           | 0.1           | 0.0           | 0.3           | 0.4           | 0.0           | 0.0               | 0.0           | 0.0           | 0.1           | 0.0               | 0.0           | 0.1           | 0.1           | 0.2           | 0.0           | 0.1           | 0.0           |
| General trust: Experts                       | 0.0           | 0.0           | 0.3           | 0.0           | 0.3           | 0.0           | 0.3           | 0.0           | 0.1           | 0.4           | 0.1           | 0.1           | 0.0           | 0.0               | 0.0           | 0.1           | 0.0           | 0.1               | 0.4           | 0.3           | 0.1           | 0.4           | 0.0           | 0.0           | 0.0           |
| General trust:Govt                           | 0.1           | -             | 0.3           | 0.0           | 0.1           | 0.0           | 0.9           | 0.1           | 0.1           | 0.3           | 0.3           | 0.1           | 0.0           | 0.0               | 0.0           | 0.1           | 0.0           | 0.0               | 0.0           | 0.2           | 0.0           | 0.2           | 0.0           | 0.0           | 0.1           |
| COVID trust:<br>Politicians                  | 3.4           | -             | 1.7           | 1.3           | 0.0           | 0.0           | 10.0          | 0.4           | 0.1           | 4.8           | 0.3           | 0.1           | 2.3           | 0.1               | 0.0           | 0.0           | 0.0           | 0.1               | 0.2           | 0.1           | 0.0           | 0.2           | 0.0           | 0.1           | 0.0           |
| COVID Trust:<br>National sci/med<br>advisors | 3.4           | -             | 1.7           | 1.3           | 0.1           | 0.0           | 10.0          | 0.3           | 0.0           | 4.8           | 0.3           | 0.1           | 2.3           | 0.0               | 0.0           | 0.0           | 0.0           | 0.1               | 0.2           | 0.1           | 0.0           | 0.1           | 0.0           | 0.3           | -             |
| COVID Trust:<br>Independent scientists       | 3.4           | -             | 1.7           | 1.6           | 0.1           | 0.0           | 10.1          | 0.3           | 0.0           | 4.8           | 0.3           | 0.0           | 2.3           | 0.0               | 0.0           | 0.0           | 0.0           | 0.1               | -             | 0.2           | 0.0           | 0.1           | 0.1           | 0.3           | -             |
| COVID Trust: WHO                             | 3.4           | -             | 2.0           | 1.4           | 0.0           | 0.0           | 10.0          | 0.6           | 0.1           | 4.9           | 0.3           | 0.0           | 2.3           | 0.0               | 0.0           | 0.1           | 0.0           | 0.2               | 0.2           | 0.2           | 0.0           | 0.1           | 0.1           | 0.3           | -             |
| Personal efficacy                            | 3.7           | -             | 2.0           | 1.3           | 0.0           | 0.0           | 10.3          | 0.6           | 0.1           | 4.8           | 0.3           | 0.0           | 2.4           | 0.0               | 0.1           | 0.0           | 0.2           | 0.2               | 0.4           | 0.3           | 0.1           | 0.2           | 0.0           | 0.3           | 0.0           |
| Govt efficacy                                | 3.6           | -             | 2.0           | 1.4           | 0.3           | 0.0           | 10.4          | 0.4           | 0.1           | 4.8           | 0.6           | 0.0           | 2.4           | 0.0               | 0.0           | 0.0           | 0.1           | 0.2               | 0.2           | 0.3           | 0.0           | 0.1           | 0.0           | 0.3           | 0.1           |
| Perceived infection<br>risk                  | 1.4           | 0.3           | 1.0           | 0.9           | 0.0           | 0.0           | 3.0           | 0.0           | 0.0           | 1.7           | 0.1           | 0.0           | 1.1           | 0.0               | 0.0           | 0.0           | 0.0           | 0.1               | 0.4           | 0.2           | 0.2           | 0.0           | 0.1           | 0.4           | 0.0           |
| Worry about COVID                            | 1.0           | 0.0           | 0.6           | 0.6           | 0.0           | 0.0           | 2.4           | 0.1           | 0.3           | 1.4           | 0.0           | 0.0           | 0.7           | 0.0               | 0.0           | 0.0           | 0.0           | 0.1               | 0.2           | 0.3           | 0.0           | 0.1           | 0.1           | 0.1           | 0.0           |
| Vaccine acceptance                           | 4.0           | 0.1           | 1.9           | 1.4           | 0.1           | 0.0           | 11.4          | 0.1           | 0.1           | 5.8           | 0.3           | 0.4           | 2.4           | 0.1               | 0.0           | 0.0           | 0.0           | 0.2               | 0.2           | 0.3           | 0.1           | 0.1           | 0.1           | 0.1           | 0.0           |
| Vaccine recommend                            | 4.1           | 0.1           | 1.9           | 1.6           | 0.1           | 0.0           | 11.4          | 0.1           | 0.1           | 6.3           | 0.6           | 0.4           | 2.4           | 0.1               | 0.0           | 0.1           | 0.1           | 0.2               | 0.2           | 0.4           | 0.1           | 0.1           | 0.1           | 0.1           | 0.0           |
| Vaccine attitudes                            | -             | -             | -             | -             | -             | -             | -             | -             | -             | -             | -             | -             | -             | -                 | -             | -             | 0.3           | -                 | -             | -             | 0.2           | 0.3           | -             | -             | -             |

‘-’ indicates variable not included in survey.

Table S4

Descriptive statistics for all samples (Mean (SD)), excluding US and UK samples (see Table S5)

|                                          | ALL              | AU_D<br>(Mar)    | CN_R<br>(Apr)    | DE_R<br>(Mar)    | ES_R<br>(Mar)    | ES_R<br>(May)    | FR_B<br>(Apr)               | IT_R<br>(Mar)    | JP_R<br>(Apr)    | KR_R<br>(Apr)    | MX_R<br>(Mar)    | MX_R<br>(May)    | SE_R<br>(Mar)    | SE_R<br>(Apr)    |
|------------------------------------------|------------------|------------------|------------------|------------------|------------------|------------------|-----------------------------|------------------|------------------|------------------|------------------|------------------|------------------|------------------|
| Age                                      | 45.27<br>(22.29) | 46.30<br>(16.44) | 43.21<br>(14.26) | 46.61<br>(16.00) | 46.64<br>(15.03) | 46.00<br>(15.03) | 48.79<br>(16.53)            | 46.95<br>(26.06) | 48.08<br>(16.35) | 45.34<br>(15.51) | 38.39<br>(14.24) | 38.68<br>(14.56) | 48.41<br>(77.28) | 45.31<br>(16.74) |
| Gender (Female)                          | 0.51<br>(0.50)   | 0.51<br>(0.50)   | 0.49<br>(0.50)   | 0.50<br>(0.50)   | 0.51<br>(0.50)   | 0.50<br>(0.50)   | 0.48<br>(0.50)              | 0.50<br>(0.50)   | 0.51<br>(0.50)   | 0.49<br>(0.50)   | 0.50<br>(0.50)   | 0.51<br>(0.50)   | 0.49<br>(0.50)   | 0.49<br>(0.50)   |
| Education                                | 3.42<br>(1.13)   | 3.17<br>(1.12)   | 3.64<br>(0.88)   | 3.07<br>(1.19)   | 3.59<br>(1.08)   | 3.60<br>(1.07)   | 5.00 <sup>a</sup><br>(1.12) | 3.51<br>(1.23)   | 3.56<br>(0.81)   | 3.76<br>(0.79)   | 3.55<br>(0.94)   | 3.74<br>(0.88)   | 3.30<br>(1.06)   | 3.34<br>(1.01)   |
| Numeracy                                 | 2.66<br>(1.11)   | 2.41<br>(1.06)   | 2.83<br>(1.25)   | 2.53<br>(1.12)   | 2.39<br>(1.03)   | 2.42<br>(0.97)   | 2.18<br>(0.70)              | 2.13<br>(0.71)   | 2.77<br>(1.25)   | 2.60<br>(1.06)   | 2.16<br>(0.90)   | 2.31<br>(0.95)   | 2.52<br>(1.23)   | 2.57<br>(1.21)   |
| Politics (Conservative)                  | 3.74<br>(1.41)   | 3.83<br>(1.30)   | -                | 3.79<br>(1.19)   | 3.50<br>(1.43)   | 3.44<br>(1.50)   | -                           | 3.87<br>(1.45)   | 4.09<br>(1.09)   | 3.88<br>(1.20)   | 3.65<br>(1.31)   | 3.57<br>(1.33)   | 3.92<br>(1.59)   | 3.88<br>(1.61)   |
| Prosociality                             | 5.21<br>(1.36)   | 5.23<br>(1.36)   | 5.54<br>(1.19)   | 4.97<br>(1.42)   | 5.74<br>(1.21)   | 5.35<br>(1.34)   | 5.23<br>(1.41)              | 5.76<br>(1.38)   | 4.74<br>(1.42)   | 4.40<br>(1.31)   | 5.34<br>(1.61)   | 5.26<br>(1.53)   | 4.87<br>(1.43)   | 4.63<br>(1.48)   |
| General social trust                     | 3.66<br>(1.71)   | 3.95<br>(1.67)   | 4.96<br>(1.67)   | 3.61<br>(1.65)   | 3.47<br>(1.87)   | 3.29<br>(1.77)   | 2.98<br>(1.62)              | 3.70<br>(1.61)   | 3.85<br>(1.48)   | 3.97<br>(1.50)   | 2.81<br>(1.84)   | 2.94<br>(1.84)   | 3.73<br>(1.73)   | 3.85<br>(1.73)   |
| General trust: Experts                   | 3.97<br>(0.77)   | 3.97<br>(0.79)   | 4.26<br>(0.61)   | 3.90<br>(0.74)   | 4.19<br>(0.72)   | 4.09<br>(0.76)   | 3.76<br>(0.81)              | 4.02<br>(0.74)   | 3.51<br>(0.72)   | 3.74<br>(0.68)   | 4.05<br>(0.85)   | 4.10<br>(0.83)   | 3.90<br>(0.75)   | 3.85<br>(0.75)   |
| General trust: Govt                      | 2.64<br>(0.91)   | 2.96<br>(0.93)   | -                | 3.14<br>(0.92)   | 2.75<br>(0.94)   | 2.54<br>(0.89)   | 2.48<br>(0.90)              | 2.89<br>(0.91)   | 2.46<br>(0.84)   | 2.65<br>(0.81)   | 2.28<br>(1.01)   | 2.35<br>(1.02)   | 3.04<br>(1.00)   | 3.00<br>(1.01)   |
| COVID trust: Politicians                 | 3.48<br>(1.87)   | 4.44<br>(1.75)   | -                | 4.80<br>(1.65)   | 4.01<br>(1.88)   | 3.45<br>(1.91)   | 3.33<br>(1.78)              | 4.35<br>(1.74)   | 3.03<br>(1.60)   | 4.24<br>(1.63)   | 3.22<br>(1.99)   | 3.51<br>(1.96)   | 4.13<br>(1.78)   | 4.24<br>(1.83)   |
| COVID Trust: National sci/med advisors   | 4.91<br>(1.60)   | 5.34<br>(1.41)   | -                | 5.40<br>(1.43)   | 5.45<br>(1.39)   | 4.92<br>(1.65)   | 4.46<br>(1.73)              | 5.42<br>(1.40)   | 3.90<br>(1.51)   | 5.15<br>(1.37)   | 5.18<br>(1.69)   | 5.28<br>(1.60)   | 4.78<br>(1.67)   | 4.93<br>(1.66)   |
| COVID Trust: Independent scientists      | 4.66<br>(1.55)   | 4.77<br>(1.49)   | -                | 5.11<br>(1.38)   | 5.15<br>(1.39)   | 4.83<br>(1.55)   | 4.62<br>(1.52)              | 4.80<br>(1.45)   | 3.73<br>(1.51)   | 5.03<br>(1.26)   | 5.02<br>(1.68)   | 4.91<br>(1.65)   | 4.66<br>(1.52)   | 4.55<br>(1.48)   |
| COVID Trust: WHO                         | 4.84<br>(1.68)   | 5.19<br>(1.55)   | -                | 5.16<br>(1.52)   | 5.46<br>(1.42)   | 4.88<br>(1.62)   | 4.80<br>(1.61)              | 5.25<br>(1.48)   | 3.12<br>(1.55)   | 3.96<br>(1.51)   | 5.80<br>(1.45)   | 5.58<br>(1.62)   | 5.05<br>(1.45)   | 4.81<br>(1.55)   |
| Personal efficacy                        | 5.22<br>(1.48)   | 5.14<br>(1.45)   | -                | 5.24<br>(1.41)   | 5.31<br>(1.47)   | 5.14<br>(1.47)   | 5.20<br>(1.47)              | 5.31<br>(1.46)   | 4.26<br>(1.42)   | 5.42<br>(1.24)   | 5.36<br>(1.66)   | 5.56<br>(1.53)   | 5.20<br>(1.50)   | 5.26<br>(1.45)   |
| Govt efficacy                            | 3.86<br>(1.78)   | 4.48<br>(1.63)   | -                | 4.68<br>(1.47)   | 4.21<br>(1.77)   | 4.11<br>(1.83)   | 4.22<br>(1.68)              | 4.60<br>(1.60)   | 3.21<br>(1.52)   | 5.08<br>(1.52)   | 3.82<br>(2.06)   | 4.39<br>(1.86)   | 4.30<br>(1.73)   | 4.41<br>(1.67)   |
| Perceived infection risk                 | 4.17<br>(1.32)   | 4.16<br>(1.40)   | 3.26<br>(1.37)   | 4.13<br>(1.34)   | 4.46<br>(1.23)   | 4.38<br>(1.26)   | 4.19<br>(1.24)              | 3.93<br>(1.30)   | 4.48<br>(1.20)   | 4.37<br>(1.22)   | 4.16<br>(1.47)   | 4.29<br>(1.43)   | 4.30<br>(1.37)   | 4.37<br>(1.29)   |
| Worry about COVID                        | 5.56<br>(1.52)   | 5.56<br>(1.51)   | 5.37<br>(1.57)   | 5.66<br>(1.49)   | 6.25<br>(1.17)   | 6.11<br>(1.26)   | 5.63<br>(1.43)              | 6.08<br>(1.27)   | 5.83<br>(1.28)   | 5.59<br>(1.29)   | 5.92<br>(1.46)   | 6.06<br>(1.35)   | 5.27<br>(1.55)   | 4.98<br>(1.66)   |
| Vaccine – acceptance                     | 0.76<br>(0.43)   | 0.83<br>(0.38)   | 0.86<br>(0.35)   | 0.81<br>(0.39)   | 0.84<br>(0.37)   | 0.80<br>(0.40)   | 0.70<br>(0.46)              | 0.85<br>(0.35)   | 0.74<br>(0.44)   | 0.86<br>(0.35)   | 0.88<br>(0.32)   | 0.74<br>(0.44)   | 0.66<br>(0.47)   | 0.63<br>(0.48)   |
| Vaccine – recommend to vulnerable others | 0.82<br>(0.38)   | 0.89<br>(0.32)   | 0.87<br>(0.33)   | 0.89<br>(0.31)   | 0.90<br>(0.30)   | 0.82<br>(0.38)   | 0.81<br>(0.40)              | 0.88<br>(0.32)   | 0.80<br>(0.40)   | 0.88<br>(0.32)   | 0.90<br>(0.30)   | 0.76<br>(0.43)   | 0.77<br>(0.42)   | 0.74<br>(0.44)   |
| General vaccine attitudes                | 4.05<br>(1.11)   | -                | -                | -                | -                | -                | -                           | -                | -                | -                | -                | -                | -                | -                |

<sup>a</sup> Education item in France differed from other surveys – see Table S1.

Table S5

Descriptive statistics for all US and UK samples (Mean (SD))

|                                          | UK_P<br>(Mar)    | UK_P<br>(May)    | UK_P<br>(Jul)    | UK_P<br>(Sep)    | UK_R<br>(May)    | UK_R<br>(Jun)    | UK_R<br>(Jul)    | UK_R<br>(Sep)    | UK_R<br>(Oct)    | US_P<br>(Mar)    | US_R<br>(May)    | US_R<br>(Sep)    |
|------------------------------------------|------------------|------------------|------------------|------------------|------------------|------------------|------------------|------------------|------------------|------------------|------------------|------------------|
| Age                                      | 45.63<br>(15.69) | 45.22<br>(23.08) | 44.76<br>(17.55) | 38.14<br>(15.01) | 45.64<br>(15.99) | 45.90<br>(15.87) | 46.01<br>(24.36) | 45.75<br>(19.58) | 47.13<br>(23.44) | 45.09<br>(15.90) | 45.73<br>(26.53) | 44.76<br>(15.60) |
| Gender (Female)                          | 0.51<br>(0.50)   | 0.51<br>(0.50)   | 0.53<br>(0.50)   | 0.52<br>(0.50)   | 0.52<br>(0.50)   | 0.53<br>(0.50)   | 0.52<br>(0.50)   | 0.52<br>(0.50)   | 0.52<br>(0.50)   | 0.51<br>(0.50)   | 0.51<br>(0.50)   | 0.51<br>(0.50)   |
| Education                                | 3.45<br>(1.17)   | 3.50<br>(1.14)   | 3.58<br>(1.14)   | 3.54<br>(1.10)   | 3.17<br>(1.27)   | -                | 3.20<br>(1.23)   | 3.15<br>(1.28)   | 3.10<br>(1.23)   | 3.87<br>(0.88)   | 3.70<br>(0.90)   | -                |
| Numeracy                                 | 3.22<br>(1.17)   | 3.23<br>(1.14)   | 3.04<br>(1.06)   | 3.24<br>(1.15)   | 2.64<br>(1.14)   | 2.74<br>(1.10)   | 2.61<br>(1.07)   | 2.60<br>(1.07)   | 2.78<br>(1.11)   | 3.14<br>(1.13)   | 2.76<br>(1.14)   | 2.58<br>(1.12)   |
| Politics (Conservative)                  | 3.69<br>(1.43)   | 3.67<br>(1.39)   | 3.58<br>(1.36)   | 3.37<br>(1.36)   | 3.90<br>(1.35)   | 3.89<br>(1.19)   | 3.90<br>(1.33)   | 3.84<br>(1.36)   | 3.83<br>(1.32)   | 3.22<br>(1.65)   | 3.92<br>(1.69)   | 4.07<br>(1.65)   |
| Prosociality                             | 5.50<br>(1.07)   | 5.36<br>(1.19)   | 5.32<br>(1.16)   | 5.42<br>(1.17)   | 5.12<br>(1.33)   | 5.25<br>(1.29)   | 5.03<br>(1.29)   | 5.08<br>(1.39)   | 5.38<br>(1.36)   | 5.43<br>(1.28)   | 5.05<br>(1.36)   | 5.02<br>(1.44)   |
| General social trust                     | 4.04<br>(1.59)   | 4.12<br>(1.55)   | 4.11<br>(1.55)   | 3.69<br>(1.56)   | 3.74<br>(1.71)   | 3.58<br>(1.70)   | 3.86<br>(1.59)   | 3.68<br>(1.68)   | 3.66<br>(1.64)   | 4.01<br>(1.68)   | 3.79<br>(1.73)   | 3.47<br>(1.84)   |
| General trust: Experts                   | 4.24<br>(0.66)   | 4.11<br>(0.63)   | 4.14<br>(0.66)   | 4.17<br>(0.68)   | 3.89<br>(0.79)   | 3.88<br>(0.81)   | 3.92<br>(0.76)   | 3.90<br>(0.78)   | 3.92<br>(0.77)   | 4.22<br>(0.73)   | 3.96<br>(0.77)   | 3.89<br>(0.83)   |
| General trust: Govt                      | 2.82<br>(0.85)   | 2.80<br>(0.82)   | 2.60<br>(0.82)   | 2.44<br>(0.81)   | 2.82<br>(0.87)   | 2.64<br>(0.87)   | 2.70<br>(0.88)   | 2.60<br>(0.90)   | 2.55<br>(0.86)   | 2.55<br>(0.79)   | 2.68<br>(0.83)   | 2.52<br>(0.88)   |
| COVID trust: Politicians                 | 3.81<br>(1.78)   | 3.80<br>(1.81)   | 3.16<br>(1.80)   | 2.57<br>(1.65)   | 4.00<br>(1.86)   | 3.38<br>(1.70)   | 3.60<br>(1.83)   | 3.23<br>(1.86)   | 3.04<br>(1.79)   | 3.06<br>(1.74)   | 3.11<br>(1.77)   | 2.93<br>(1.81)   |
| COVID Trust: National sci/med advisors   | 5.27<br>(1.47)   | 5.13<br>(1.41)   | 5.12<br>(1.47)   | 4.88<br>(1.58)   | 4.94<br>(1.57)   | 4.58<br>(1.51)   | 4.88<br>(1.53)   | 4.66<br>(1.61)   | 4.60<br>(1.66)   | 5.46<br>(1.41)   | 5.15<br>(1.55)   | -                |
| COVID Trust: Independent scientists      | 4.88<br>(1.48)   | 4.59<br>(1.44)   | 4.74<br>(1.48)   | 4.77<br>(1.60)   | 4.46<br>(1.52)   | -                | 4.54<br>(1.52)   | 4.40<br>(1.61)   | 4.28<br>(1.63)   | 5.16<br>(1.48)   | 4.72<br>(1.60)   | -                |
| COVID Trust: WHO                         | 5.59<br>(1.40)   | 4.97<br>(1.55)   | 5.02<br>(1.62)   | 4.77<br>(1.70)   | 4.76<br>(1.69)   | 4.46<br>(1.69)   | 4.72<br>(1.66)   | 4.50<br>(1.69)   | 4.44<br>(1.71)   | 5.62<br>(1.55)   | 4.57<br>(1.90)   | -                |
| Personal efficacy                        | 5.04<br>(1.39)   | 5.59<br>(1.26)   | 5.47<br>(1.35)   | 5.12<br>(1.48)   | 5.36<br>(1.48)   | 5.13<br>(1.45)   | 5.30<br>(1.45)   | 5.09<br>(1.52)   | 5.03<br>(1.52)   | 5.25<br>(1.45)   | 5.32<br>(1.47)   | 5.14<br>(1.57)   |
| Govt efficacy                            | 3.86<br>(1.75)   | 3.85<br>(1.70)   | 3.48<br>(1.72)   | 3.03<br>(1.62)   | 4.13<br>(1.74)   | 3.66<br>(1.61)   | 3.88<br>(1.75)   | 3.58<br>(1.73)   | 3.36<br>(1.70)   | 3.28<br>(1.80)   | 3.76<br>(1.76)   | 3.25<br>(1.86)   |
| Perceived infection risk                 | 4.89<br>(1.32)   | 4.26<br>(1.24)   | 3.96<br>(1.24)   | 4.26<br>(1.30)   | 4.14<br>(1.22)   | 3.94<br>(1.25)   | 3.86<br>(1.25)   | 4.13<br>(1.28)   | 4.27<br>(1.24)   | 3.98<br>(1.52)   | 3.91<br>(1.38)   | 4.11<br>(1.38)   |
| Worry about COVID                        | 5.80<br>(1.36)   | 5.72<br>(1.40)   | 5.28<br>(1.52)   | 5.36<br>(1.58)   | 5.60<br>(1.51)   | 5.34<br>(1.57)   | 5.30<br>(1.60)   | 5.39<br>(1.61)   | 5.39<br>(1.63)   | 5.49<br>(1.58)   | 5.58<br>(1.60)   | 5.43<br>(1.72)   |
| Vaccine – acceptance                     | 0.80<br>(0.40)   | 0.80<br>(0.40)   | 0.79<br>(0.41)   | 0.73<br>(0.44)   | 0.79<br>(0.41)   | 0.79<br>(0.41)   | 0.80<br>(0.40)   | 0.76<br>(0.43)   | 0.72<br>(0.45)   | 0.76<br>(0.43)   | 0.75<br>(0.44)   | 0.63<br>(0.48)   |
| Vaccine – recommend to vulnerable others | 0.92<br>(0.28)   | 0.87<br>(0.34)   | 0.85<br>(0.36)   | 0.80<br>(0.40)   | 0.84<br>(0.36)   | 0.83<br>(0.38)   | 0.84<br>(0.36)   | 0.80<br>(0.40)   | 0.76<br>(0.43)   | 0.86<br>(0.35)   | 0.80<br>(0.40)   | 0.68<br>(0.47)   |
| General vaccine attitudes                | -                | -                | -                | 4.21<br>(1.10)   | -                | -                | -                | 3.90<br>(1.14)   | 4.05<br>(1.06)   | -                | -                | -                |



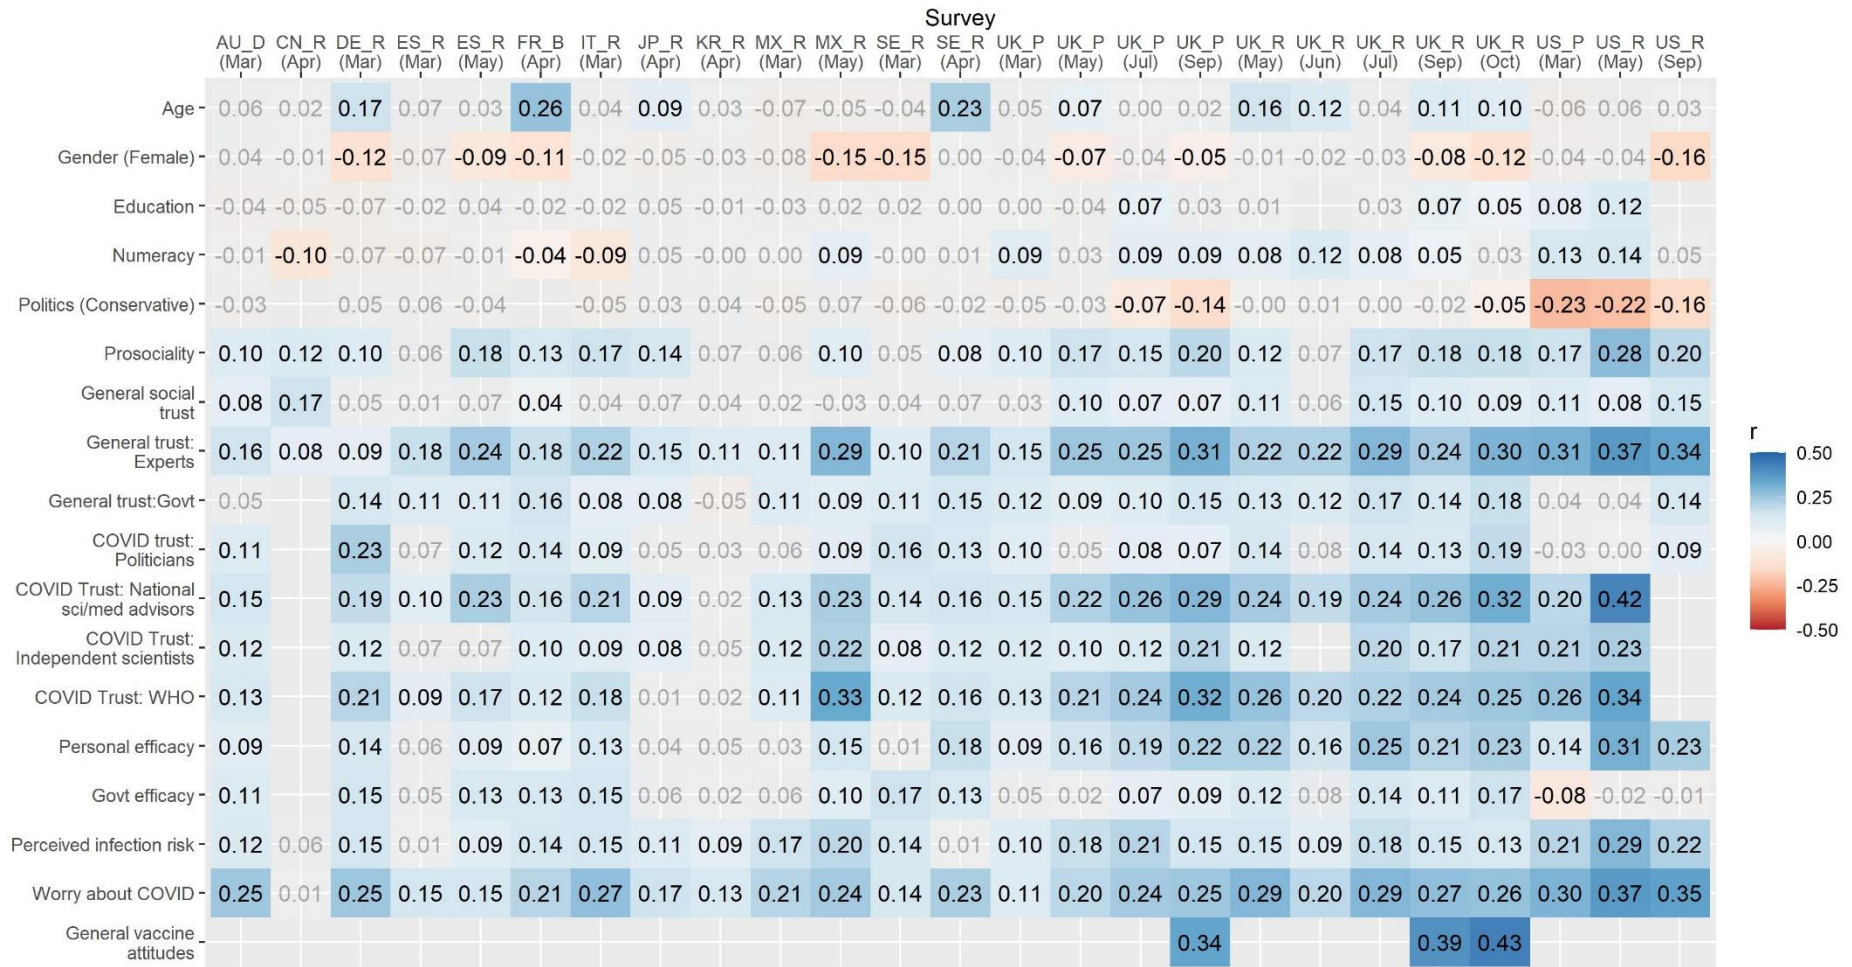

Figure S1. Point biserial correlations between predictors and vaccine acceptance across all samples. Greyed values are non-significant ( $p > .05$ ). Blank spaces indicate predictors which were not included in a given survey



Table S6

Full logistic regression results from model predicting vaccine acceptance, excluding UK and US samples (shown in Table S7)

|                                        | ALL           | ALL (-UK)     | AU_D (Mar)    | DE_R (Mar)     | ES_R (Mar)     | ES_R (May)     | FR_B (Apr)    | IT_R (Mar)     | JP_R (Apr)    | KR_R (Apr)     | MX_R (Mar)     | MX_R (May)    | SE_R (Mar)    | SE_R (Apr)    |
|----------------------------------------|---------------|---------------|---------------|----------------|----------------|----------------|---------------|----------------|---------------|----------------|----------------|---------------|---------------|---------------|
|                                        | OR            | OR            | OR            | OR             | OR             | OR             | OR            | OR             | OR            | OR             | OR             | OR            | OR            | OR            |
| (Intercept)                            | 5.15 ***      | 5.00 ***      | 5.59 ***      | 9.38 ***       | 8.10 ***       | 7.35 ***       | 3.35 ***      | 11.73 ***      | 3.70 ***      | 7.89 ***       | 15.24 ***      | 5.43 ***      | 3.17 ***      | 2.20 ***      |
|                                        | [4.86 – 5.46] | (4.58 – 5.46) | [4.08 – 7.83] | [6.51 – 13.96] | [5.74 – 11.79] | [5.28 – 10.50] | [2.93 – 3.84] | [7.54 – 19.18] | [2.78 – 4.99] | [5.66 – 11.31] | [9.74 – 25.20] | [3.99 – 7.55] | [2.45 – 4.14] | [1.71 – 2.86] |
| Age                                    | 1.15 ***      | 1.00          | 1.12          | 1.61 ***       | 1.10           | 1.00           | 1.68 ***      | 1.15           | 1.23          | 0.97           | 0.73 *         | 0.86          | 0.92          | 1.47 ***      |
|                                        | [1.09 – 1.22] | (0.96 – 1.07) | [0.88 – 1.42] | [1.27 – 2.06]  | [0.87 – 1.38]  | [0.80 – 1.25]  | [1.53 – 1.84] | [0.79 – 1.91]  | [1.00 – 1.52] | [0.77 – 1.23]  | [0.55 – 0.96]  | [0.70 – 1.05] | [0.56 – 1.09] | [1.21 – 1.79] |
| Gender (Female) <sup>a</sup>           | 0.59 ***      | 0.61 ***      | 1.20          | 0.37 ***       | 0.53 **        | 0.47 ***       | 0.65 ***      | 0.59           | 0.76          | 0.75           | 0.49 *         | 0.42 ***      | 0.43 ***      | 0.71          |
|                                        | [0.55 – 0.64] | (0.55 – 0.69) | [0.76 – 1.88] | [0.23 – 0.59]  | [0.33 – 0.83]  | [0.30 – 0.72]  | [0.54 – 0.77] | [0.34 – 1.03]  | [0.50 – 1.13] | [0.48 – 1.19]  | [0.27 – 0.87]  | [0.28 – 0.62] | [0.30 – 0.62] | [0.49 – 1.03] |
| Education                              | 1.02          | 1.00          | 0.85          | 0.86           | 0.95           | 1.11           | 0.99          | 0.98           | 1.13          | 0.98           | 0.94           | 0.99          | 1.03          | 0.97          |
|                                        | [0.98 – 1.06] | (0.93 – 1.07) | [0.67 – 1.07] | [0.68 – 1.08]  | [0.77 – 1.18]  | [0.90 – 1.36]  | [0.91 – 1.09] | [0.74 – 1.30]  | [0.93 – 1.39] | [0.78 – 1.23]  | [0.70 – 1.25]  | [0.81 – 1.20] | [0.86 – 1.23] | [0.81 – 1.16] |
| Numeracy                               | 1.01          | 0.94 *        | 0.91          | 0.84           | 0.80 *         | 0.88           | 0.90 *        | 0.64 **        | 0.99          | 0.92           | 0.95           | 1.00          | 0.92          | 1.01          |
|                                        | [0.97 – 1.05] | (0.89 – 0.99) | [0.73 – 1.15] | [0.67 – 1.05]  | [0.65 – 0.99]  | [0.72 – 1.09]  | [0.82 – 0.99] | [0.48 – 0.84]  | [0.81 – 1.23] | [0.73 – 1.16]  | [0.73 – 1.25]  | [0.82 – 1.22] | [0.77 – 1.11] | [0.84 – 1.22] |
| Politics (Conservative)                | 0.94 **       | 0.95          | 0.87          | 1.21           | 1.23           | 1.06           |               | 0.88           | 1.02          | 1.02           | 0.86           | 1.18          | 0.91          | 0.91          |
|                                        | [0.90 – 0.98] | (0.90 – 1.00) | [0.68 – 1.11] | [0.96 – 1.52]  | [0.98 – 1.55]  | [0.84 – 1.33]  |               | [0.66 – 1.18]  | [0.84 – 1.25] | [0.80 – 1.30]  | [0.65 – 1.14]  | [0.97 – 1.44] | [0.76 – 1.10] | [0.75 – 1.10] |
| Prosociality                           | 1.07 **       | 1.06 *        | 0.98          | 1.05           | 0.98           | 1.20           | 1.07          | 1.05           | 1.16          | 1.26           | 1.01           | 0.99          | 0.96          | 0.96          |
|                                        | [1.03 – 1.11] | (1.00 – 1.13) | [0.75 – 1.26] | [0.82 – 1.35]  | [0.78 – 1.24]  | [0.96 – 1.50]  | [0.98 – 1.17] | [0.78 – 1.39]  | [0.93 – 1.45] | [0.98 – 1.62]  | [0.76 – 1.32]  | [0.81 – 1.22] | [0.79 – 1.16] | [0.79 – 1.16] |
| General social trust                   | 1.06 **       | 1.06          | 1.18          | 0.96           | 0.93           | 1.15           | 1.00          | 0.99           | 0.97          | 1.14           | 1.25           | 0.93          | 0.99          | 1.01          |
|                                        | [1.02 – 1.11] | (1.00 – 1.13) | [0.91 – 1.52] | [0.75 – 1.24]  | [0.73 – 1.17]  | [0.92 – 1.44]  | [0.91 – 1.10] | [0.74 – 1.33]  | [0.77 – 1.22] | [0.87 – 1.48]  | [0.94 – 1.70]  | [0.76 – 1.14] | [0.81 – 1.20] | [0.83 – 1.23] |
| General trust: Experts                 | 1.28 ***      | 1.27 ***      | 1.38 *        | 0.90           | 1.33 *         | 1.55 ***       | 1.18 **       | 1.45 *         | 1.25          | 1.30           | 1.05           | 1.46 **       | 1.15          | 1.19          |
|                                        | [1.22 – 1.34] | (1.18 – 1.36) | [1.06 – 1.80] | [0.66 – 1.21]  | [1.02 – 1.73]  | [1.23 – 1.97]  | [1.06 – 1.31] | [1.05 – 2.01]  | [0.97 – 1.60] | [1.00 – 1.71]  | [0.77 – 1.40]  | [1.16 – 1.84] | [0.91 – 1.44] | [0.95 – 1.49] |
| General trust: Govt                    | 1.02          | 0.93          | 0.74          | 1.06           | 1.24           | 1.01           | 1.08          | 0.97           | 1.07          | 0.70 *         | 1.29           | 1.01          | 0.97          | 1.06          |
|                                        | [0.96 – 1.07] | (0.86 – 1.01) | [0.54 – 1.00] | [0.77 – 1.47]  | [0.91 – 1.70]  | [0.76 – 1.34]  | [0.94 – 1.23] | [0.67 – 1.39]  | [0.81 – 1.40] | [0.52 – 0.93]  | [0.90 – 1.89]  | [0.78 – 1.31] | [0.75 – 1.26] | [0.79 – 1.42] |
| COVID trust: Politicians               | 1.06          | 1.04          | 1.14          | 1.49 *         | 1.16           | 1.13           | 1.11          | 0.72           | 0.98          | 1.17           | 0.91           | 1.09          | 1.16          | 0.89          |
|                                        | [1.00 – 1.13] | (0.95 – 1.13) | [0.78 – 1.66] | [1.02 – 2.20]  | [0.83 – 1.63]  | [0.81 – 1.57]  | [0.97 – 1.27] | [0.45 – 1.12]  | [0.67 – 1.41] | [0.86 – 1.58]  | [0.61 – 1.36]  | [0.80 – 1.47] | [0.85 – 1.59] | [0.64 – 1.23] |
| COVID Trust: National sci/med advisors | 1.22 ***      | 1.23 ***      | 1.08          | 0.95           | 0.95           | 1.66 ***       | 1.22 **       | 1.13           | 1.08          | 0.88           | 1.23           | 1.08          | 1.05          | 1.04          |
|                                        | [1.16 – 1.29] | (1.13 – 1.34) | [0.76 – 1.52] | [0.64 – 1.42]  | [0.69 – 1.31]  | [1.24 – 2.24]  | [1.08 – 1.39] | [0.72 – 1.78]  | [0.79 – 1.48] | [0.63 – 1.24]  | [0.89 – 1.70]  | [0.82 – 1.42] | [0.79 – 1.41] | [0.77 – 1.41] |
| COVID Trust: Independent scientists    | 0.95 *        | 1.00          | 1.02          | 0.88           | 1.00           | 0.73 *         | 0.98          | 0.99           | 1.05          | 1.01           | 1.05           | 1.12          | 0.99          | 1.03          |
|                                        | [0.90 – 0.99] | (0.93 – 1.07) | [0.76 – 1.34] | [0.64 – 1.21]  | [0.76 – 1.31]  | [0.56 – 0.95]  | [0.89 – 1.09] | [0.70 – 1.37]  | [0.78 – 1.41] | [0.74 – 1.37]  | [0.78 – 1.42]  | [0.89 – 1.41] | [0.78 – 1.24] | [0.83 – 1.27] |
| COVID Trust: WHO                       | 1.19 ***      | 1.10 **       | 0.96          | 1.57 **        | 1.00           | 1.03           | 1.05          | 1.11           | 0.90          | 1.07           | 1.12           | 1.59 ***      | 1.15          | 1.28 *        |
|                                        | [1.13 – 1.24] | (1.03 – 1.18) | [0.71 – 1.28] | [1.15 – 2.14]  | [0.74 – 1.33]  | [0.78 – 1.35]  | [0.94 – 1.18] | [0.74 – 1.63]  | [0.69 – 1.18] | [0.83 – 1.38]  | [0.82 – 1.53]  | [1.24 – 2.04] | [0.91 – 1.45] | [1.02 – 1.60] |
| Personal efficacy                      | 1.01          | 0.93 *        | 0.85          | 1.05           | 0.93           | 0.91           | 0.87 **       | 1.02           | 0.92          | 1.01           | 0.86           | 0.82          | 0.74 **       | 1.09          |
|                                        | [0.97 – 1.06] | (0.87 – 0.99) | [0.64 – 1.12] | [0.81 – 1.35]  | [0.71 – 1.21]  | [0.71 – 1.16]  | [0.79 – 0.96] | [0.73 – 1.43]  | [0.72 – 1.18] | [0.75 – 1.36]  | [0.62 – 1.17]  | [0.64 – 1.05] | [0.60 – 0.92] | [0.90 – 1.33] |
| Govt efficacy                          | 1.01          | 1.07          | 1.25          | 0.94           | 0.97           | 1.08           | 1.05          | 1.35           | 1.15          | 1.05           | 1.00           | 0.89          | 1.20          | 1.13          |
|                                        | [0.96 – 1.07] | (0.98 – 1.16) | [0.88 – 1.79] | [0.70 – 1.26]  | [0.70 – 1.33]  | [0.79 – 1.47]  | [0.93 – 1.19] | [0.92 – 1.98]  | [0.81 – 1.64] | [0.75 – 1.46]  | [0.68 – 1.50]  | [0.66 – 1.19] | [0.89 – 1.61] | [0.85 – 1.50] |
| Perceived infection risk               | 1.12 ***      | 1.13 ***      | 1.06          | 1.49 **        | 1.00           | 1.11           | 1.29 ***      | 1.47 **        | 1.20          | 1.07           | 1.43 *         | 1.27 *        | 1.30 **       | 0.79 *        |
|                                        | [1.07 – 1.16] | (1.07 – 1.20) | [0.82 – 1.37] | [1.16 – 1.92]  | [0.80 – 1.25]  | [0.89 – 1.38]  | [1.18 – 1.42] | [1.11 – 1.96]  | [0.97 – 1.48] | [0.83 – 1.38]  | [1.06 – 1.92]  | [1.02 – 1.57] | [1.07 – 1.58] | [0.65 – 0.97] |
| Worry about COVID                      | 1.48 ***      | 1.52 ***      | 1.69 ***      | 1.34 *         | 1.37 *         | 1.19           | 1.36 ***      | 1.55 **        | 1.33 **       | 1.24           | 1.66 ***       | 1.31 *        | 1.37 **       | 1.77 ***      |
|                                        | [1.42 – 1.54] | (1.44 – 1.62) | [1.34 – 2.16] | [1.05 – 1.70]  | [1.07 – 1.74]  | [0.95 – 1.48]  | [1.24 – 1.50] | [1.18 – 2.03]  | [1.07 – 1.65] | [0.96 – 1.59]  | [1.26 – 2.21]  | [1.06 – 1.63] | [1.13 – 1.66] | [1.44 – 2.19] |
| Observations                           | 19256         | 8418          | 644           | 641            | 669            | 666            | 2969          | 532            | 590           | 677            | 629            | 684           | 653           | 656           |
| R <sup>2</sup> Tjur                    | 0.126         | 0.102         | 0.096         | 0.183          | 0.061          | 0.137          | 0.151         | 0.142          | 0.077         | 0.04           | 0.115          | 0.196         | 0.102         | 0.137         |

Odd ratios [95CI] shown, all continuous measure were standardized (scaled and mean-centered) prior to analysis. For space, samples are defined by their two character ISO country code and a letter denoting participant source (B, BVA; D, Dynata; R, Respondi). <sup>a</sup>Gender is unstandardized. Political orientation data was not collected in France, this sample is excluded from pooled data.

\*p < .05, \*\*p < .01, \*\*\* p < .001

Table S7

Full logistic regression results from model predicting vaccine acceptance, UK and US samples

|                                        | UK_P (Mar)    | UK_P (May)     | UK_P (Jul)    | UK_P (Sep)    | UK_R (May)    | UK_R (Jul)    | UK_R (Sep)    | UK_R (Oct)    | US_P (Mar)    | US_R (May)    |
|----------------------------------------|---------------|----------------|---------------|---------------|---------------|---------------|---------------|---------------|---------------|---------------|
|                                        | OR            | OR             | OR            | OR            | OR            | OR            | OR            | OR            | OR            | OR            |
| (Intercept)                            | 5.20 ***      | 7.66 ***       | 6.20 ***      | 4.16 ***      | 5.62 ***      | 6.52 ***      | 5.55 ***      | 4.94 ***      | 4.66 ***      | 5.11 ***      |
|                                        | [3.87 – 7.11] | [5.86 – 10.18] | [4.91 – 7.93] | [3.48 – 4.99] | [4.38 – 7.33] | [5.11 – 8.43] | [4.56 – 6.79] | [4.07 – 6.03] | [3.46 – 6.38] | [3.71 – 7.21] |
| Age                                    | 1.18          | 1.60 ***       | 1.06          | 1.12          | 1.48 ***      | 1.12          | 1.48 ***      | 1.60 ***      | 0.91          | 1.40          |
|                                        | [0.96 – 1.46] | [1.23 – 2.10]  | [0.90 – 1.28] | [0.99 – 1.28] | [1.22 – 1.79] | [0.95 – 1.41] | [1.26 – 1.75] | [1.31 – 1.95] | [0.74 – 1.12] | [0.96 – 2.07] |
| Gender (Female)                        | 0.79          | 0.53 ***       | 0.58 ***      | 0.61 ***      | 0.78          | 0.67 *        | 0.50 ***      | 0.44 ***      | 0.72          | 0.75          |
|                                        | [0.52 – 1.20] | [0.37 – 0.75]  | [0.43 – 0.79] | [0.48 – 0.78] | [0.56 – 1.09] | [0.48 – 0.93] | [0.39 – 0.65] | [0.34 – 0.57] | [0.48 – 1.09] | [0.49 – 1.15] |
| Education                              | 0.98          | 0.85           | 1.10          | 1.02          | 1.04          | 1.00          | 1.11          | 1.18 *        | 1.08          | 1.06          |
|                                        | [0.80 – 1.21] | [0.71 – 1.00]  | [0.95 – 1.29] | [0.91 – 1.15] | [0.88 – 1.24] | [0.85 – 1.18] | [0.98 – 1.26] | [1.04 – 1.34] | [0.88 – 1.32] | [0.86 – 1.31] |
| Numeracy                               | 1.30 *        | 0.99           | 1.19 *        | 1.11          | 1.25 *        | 1.10          | 1.00          | 1.00          | 1.21          | 1.42 **       |
|                                        | [1.05 – 1.62] | [0.84 – 1.17]  | [1.01 – 1.39] | [0.98 – 1.26] | [1.05 – 1.48] | [0.93 – 1.29] | [0.88 – 1.14] | [0.88 – 1.13] | [0.98 – 1.50] | [1.14 – 1.79] |
| Politics (Conservative)                | 0.83          | 0.90           | 0.94          | 0.84 *        | 0.91          | 0.99          | 0.88          | 0.86 *        | 0.73 *        | 0.75 *        |
|                                        | [0.66 – 1.05] | [0.74 – 1.09]  | [0.79 – 1.13] | [0.74 – 0.97] | [0.76 – 1.10] | [0.83 – 1.19] | [0.77 – 1.01] | [0.74 – 0.98] | [0.57 – 0.93] | [0.57 – 0.99] |
| Prosociality                           | 1.09          | 1.19 *         | 1.16 *        | 1.11          | 0.89          | 1.05          | 1.09          | 1.07          | 1.00          | 1.19          |
|                                        | [0.89 – 1.34] | [1.01 – 1.41]  | [1.00 – 1.35] | [0.98 – 1.26] | [0.74 – 1.06] | [0.89 – 1.24] | [0.96 – 1.25] | [0.94 – 1.23] | [0.81 – 1.23] | [0.94 – 1.49] |
| General social trust                   | 0.85          | 1.04           | 0.98          | 1.03          | 1.06          | 1.24 *        | 1.09          | 0.97          | 1.14          | 0.98          |
|                                        | [0.68 – 1.06] | [0.86 – 1.25]  | [0.83 – 1.17] | [0.91 – 1.16] | [0.88 – 1.27] | [1.04 – 1.48] | [0.95 – 1.25] | [0.85 – 1.11] | [0.91 – 1.44] | [0.78 – 1.24] |
| General trust: Experts                 | 1.06          | 1.39 **        | 1.34 ***      | 1.39 ***      | 1.12          | 1.44 ***      | 1.24 **       | 1.45 ***      | 1.53 **       | 1.38 *        |
|                                        | [0.83 – 1.34] | [1.13 – 1.70]  | [1.13 – 1.60] | [1.21 – 1.61] | [0.91 – 1.38] | [1.19 – 1.73] | [1.06 – 1.44] | [1.24 – 1.69] | [1.16 – 2.03] | [1.03 – 1.84] |
| General trust:Govt                     | 1.27          | 1.00           | 1.07          | 1.27 **       | 1.13          | 1.07          | 1.13          | 1.02          | 0.87          | 0.95          |
|                                        | [0.96 – 1.68] | [0.79 – 1.27]  | [0.86 – 1.32] | [1.07 – 1.50] | [0.90 – 1.42] | [0.85 – 1.33] | [0.94 – 1.36] | [0.86 – 1.21] | [0.67 – 1.14] | [0.71 – 1.26] |
| COVID trust: Politicians               | 1.17          | 0.98           | 1.09          | 0.94          | 1.00          | 1.22          | 1.12          | 1.26 *        | 1.21          | 1.03          |
|                                        | [0.82 – 1.67] | [0.73 – 1.31]  | [0.84 – 1.42] | [0.77 – 1.14] | [0.76 – 1.33] | [0.90 – 1.65] | [0.90 – 1.41] | [1.02 – 1.57] | [0.86 – 1.69] | [0.74 – 1.42] |
| COVID Trust: National sci/med advisors | 1.18          | 1.50 ***       | 1.23 *        | 1.13          | 1.17          | 0.98          | 1.25 *        | 1.29 **       | 0.78          | 1.92 ***      |
|                                        | [0.88 – 1.59] | [1.18 – 1.89]  | [1.00 – 1.51] | [0.97 – 1.33] | [0.92 – 1.49] | [0.77 – 1.25] | [1.04 – 1.50] | [1.07 – 1.56] | [0.57 – 1.04] | [1.39 – 2.69] |
| COVID Trust: Independent scientists    | 1.08          | 0.89           | 0.82 *        | 0.93          | 0.85          | 1.00          | 0.88          | 1.00          | 1.12          | 0.81          |
|                                        | [0.84 – 1.37] | [0.73 – 1.08]  | [0.68 – 0.98] | [0.80 – 1.07] | [0.68 – 1.05] | [0.81 – 1.22] | [0.74 – 1.03] | [0.85 – 1.17] | [0.89 – 1.41] | [0.62 – 1.06] |
| COVID Trust: WHO                       | 1.05          | 1.26 *         | 1.23 *        | 1.45 ***      | 1.52 ***      | 1.04          | 1.33 ***      | 1.03          | 1.17          | 1.02          |
|                                        | [0.80 – 1.35] | [1.04 – 1.53]  | [1.02 – 1.49] | [1.25 – 1.69] | [1.23 – 1.88] | [0.83 – 1.29] | [1.12 – 1.58] | [0.87 – 1.23] | [0.90 – 1.51] | [0.76 – 1.37] |
| Personal efficacy                      | 1.06          | 1.10           | 1.07          | 1.10          | 1.06          | 1.21 *        | 1.03          | 1.03          | 1.23          | 1.08          |
|                                        | [0.86 – 1.31] | [0.92 – 1.30]  | [0.91 – 1.25] | [0.96 – 1.25] | [0.87 – 1.29] | [1.01 – 1.45] | [0.89 – 1.19] | [0.89 – 1.18] | [0.99 – 1.52] | [0.84 – 1.39] |
| Govt efficacy                          | 0.84          | 0.82           | 1.05          | 1.01          | 1.02          | 0.94          | 0.95          | 1.04          | 1.05          | 0.97          |
|                                        | [0.62 – 1.13] | [0.63 – 1.05]  | [0.83 – 1.33] | [0.84 – 1.21] | [0.80 – 1.31] | [0.72 – 1.24] | [0.77 – 1.16] | [0.86 – 1.27] | [0.77 – 1.43] | [0.71 – 1.33] |
| Perceived infection risk               | 1.18          | 1.39 ***       | 1.30 **       | 1.04          | 1.19          | 1.15          | 1.08          | 0.98          | 1.26          | 1.45 **       |
|                                        | [0.96 – 1.46] | [1.16 – 1.66]  | [1.09 – 1.54] | [0.91 – 1.19] | [0.99 – 1.42] | [0.96 – 1.38] | [0.94 – 1.25] | [0.85 – 1.13] | [1.00 – 1.59] | [1.14 – 1.86] |
| Worry about COVID-19                   | 1.10          | 1.25 *         | 1.40 ***      | 1.36 ***      | 1.59 ***      | 1.62 ***      | 1.56 ***      | 1.44 ***      | 1.48 **       | 1.27          |
|                                        | [0.88 – 1.36] | [1.04 – 1.48]  | [1.18 – 1.65] | [1.19 – 1.57] | [1.34 – 1.89] | [1.35 – 1.95] | [1.35 – 1.80] | [1.24 – 1.66] | [1.17 – 1.87] | [0.99 – 1.64] |
| Observations                           | 698           | 1144           | 1315          | 1847          | 1098          | 1254          | 1778          | 1704          | 694           | 683           |
| R <sup>2</sup> Tjur                    | 0.068         | 0.172          | 0.161         | 0.191         | 0.168         | 0.16          | 0.173         | 0.193         | 0.184         | 0.287         |

Odd ratios [95CI] shown, all continuous measure were standardized (scaled and mean-centered) prior to analysis. For space, samples are defined by their two character ISO country code and a letter denoting participant source (R, Respondi; P, Prolific). <sup>a</sup>Gender is unstandardized

\*p < .05, \*\*p < .01, \*\*\* p < .001

1  
2  
3  
4  
5  
6  
7  
8  
9  
10  
11  
12  
13  
14  
15  
16  
17  
18  
19  
20  
21  
22  
23  
24  
25  
26  
27  
28  
29  
30  
31  
32  
33  
34  
35  
36  
37  
38  
39  
40  
41  
42  
43  
44  
45  
46

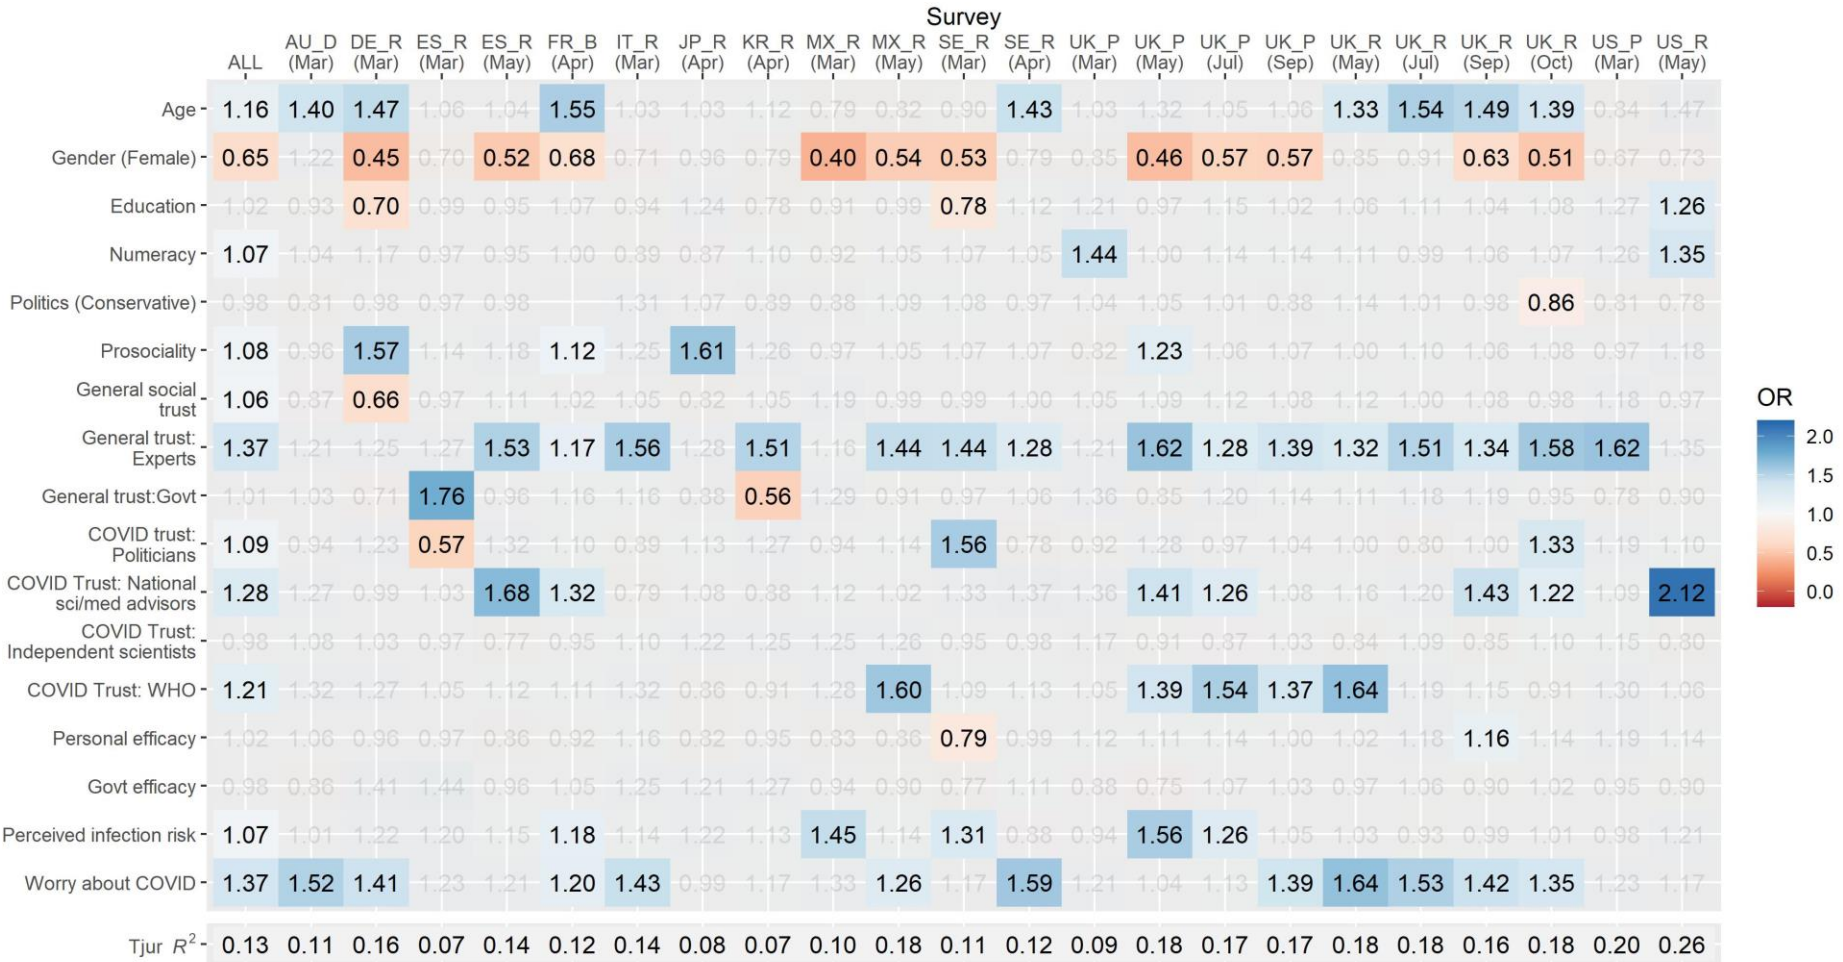

Figure S2. Heatmap of odds ratios in model predicting recommending vaccine to vulnerable friends/family. Columns represent individual samples and rows represent predictors in model. Grey values are non-significant, p > .05. Red shading indicates a lower likelihood of vaccine acceptance and blue shading a higher likelihood. For space, samples are defined by their two character ISO country code and a letter denoting participant source (B, BVA; D, Dynata; R, Respondi; P, Prolific). Political orientation data was not collected in France, this sample is excluded from pooled data..

Table S8

Full logistic regression results from model predicting vaccine recommendation to vulnerable others, excluding UK and US samples (shown in Table S9)

|                                        | ALL                       | AU_D<br>(Mar)               | DE_R<br>(Mar)                | ES_R<br>(Mar)               | ES_R<br>(May)              | FR_B<br>(Apr)             | IT_R<br>(Mar)               | JP_R<br>(Apr)             | KR_R<br>(Apr)               | MX_R<br>(Mar)                | MX_R<br>(May)             | SE_R<br>(Mar)             | SE_R<br>(Apr)             |
|----------------------------------------|---------------------------|-----------------------------|------------------------------|-----------------------------|----------------------------|---------------------------|-----------------------------|---------------------------|-----------------------------|------------------------------|---------------------------|---------------------------|---------------------------|
|                                        | OR                        | OR                          | OR                           | OR                          | OR                         | OR                        | OR                          | OR                        | OR                          | OR                           | OR                        | OR                        | OR                        |
| (Intercept)                            | 7.54 ***<br>[7.06 – 8.06] | 10.40 ***<br>[7.01 – 16.08] | 21.17 ***<br>[13.08 – 36.39] | 13.42 ***<br>[8.85 – 21.37] | 8.84 ***<br>[6.21 – 12.98] | 6.45 ***<br>[5.50 – 7.61] | 14.20 ***<br>[8.89 – 24.03] | 4.88 ***<br>[3.58 – 6.79] | 11.66 ***<br>[7.94 – 17.84] | 22.92 ***<br>[13.58 – 41.94] | 5.11 ***<br>[3.78 – 7.06] | 5.38 ***<br>[3.99 – 7.42] | 3.60 ***<br>[2.73 – 4.83] |
| Age                                    | 1.16 ***<br>[1.09 – 1.23] | 1.40 *<br>[1.05 – 1.88]     | 1.47 *<br>[1.08 – 2.00]      | 1.06<br>[0.80 – 1.40]       | 1.04<br>[0.83 – 1.32]      | 1.55 ***<br>[1.39 – 1.73] | 1.03<br>[0.77 – 1.70]       | 1.03<br>[0.81 – 1.29]     | 1.12<br>[0.86 – 1.48]       | 0.79<br>[0.58 – 1.07]        | 0.82<br>[0.67 – 1.01]     | 0.90<br>[0.63 – 1.07]     | 1.43 **<br>[1.15 – 1.78]  |
| Gender (Female) <sup>a</sup>           | 0.65 ***<br>[0.60 – 0.71] | 1.22<br>[0.71 – 2.10]       | 0.45 **<br>[0.25 – 0.80]     | 0.70<br>[0.39 – 1.21]       | 0.52 **<br>[0.32 – 0.81]   | 0.68 ***<br>[0.56 – 0.84] | 0.71<br>[0.38 – 1.29]       | 0.96<br>[0.62 – 1.50]     | 0.79<br>[0.47 – 1.32]       | 0.40 **<br>[0.20 – 0.77]     | 0.54 **<br>[0.36 – 0.80]  | 0.53 **<br>[0.35 – 0.81]  | 0.79<br>[0.53 – 1.18]     |
| Education                              | 1.02<br>[0.97 – 1.06]     | 0.93<br>[0.70 – 1.23]       | 0.70 *<br>[0.52 – 0.92]      | 0.99<br>[0.76 – 1.28]       | 0.95<br>[0.76 – 1.18]      | 1.07<br>[0.97 – 1.18]     | 0.94<br>[0.69 – 1.28]       | 1.24<br>[0.99 – 1.55]     | 0.78<br>[0.59 – 1.02]       | 0.91<br>[0.65 – 1.24]        | 0.99<br>[0.82 – 1.21]     | 0.78 *<br>[0.64 – 0.96]   | 1.12<br>[0.92 – 1.36]     |
| Numeracy                               | 1.07 ***<br>[1.03 – 1.12] | 1.04<br>[0.79 – 1.40]       | 1.17<br>[0.88 – 1.58]        | 0.97<br>[0.75 – 1.27]       | 0.95<br>[0.76 – 1.19]      | 1.00<br>[0.91 – 1.11]     | 0.89<br>[0.65 – 1.23]       | 0.87<br>[0.70 – 1.10]     | 1.10<br>[0.84 – 1.45]       | 0.92<br>[0.68 – 1.25]        | 1.05<br>[0.85 – 1.29]     | 1.07<br>[0.87 – 1.33]     | 1.05<br>[0.86 – 1.28]     |
| Politics (Conservative)                | 0.98<br>[0.94 – 1.02]     | 0.81<br>[0.60 – 1.08]       | 0.98<br>[0.73 – 1.31]        | 0.97<br>[0.74 – 1.29]       | 0.98<br>[0.77 – 1.24]      |                           | 1.31<br>[0.96 – 1.78]       | 1.07<br>[0.86 – 1.33]     | 0.89<br>[0.67 – 1.17]       | 0.88<br>[0.64 – 1.21]        | 1.09<br>[0.89 – 1.33]     | 1.08<br>[0.88 – 1.33]     | 0.97<br>[0.79 – 1.19]     |
| Prosociality                           | 1.08 ***<br>[1.03 – 1.13] | 0.96<br>[0.70 – 1.31]       | 1.57 **<br>[1.14 – 2.17]     | 1.14<br>[0.87 – 1.49]       | 1.18<br>[0.94 – 1.49]      | 1.12 *<br>[1.01 – 1.23]   | 1.25<br>[0.93 – 1.67]       | 1.61 ***<br>[1.26 – 2.07] | 1.26<br>[0.95 – 1.66]       | 0.97<br>[0.72 – 1.31]        | 1.05<br>[0.86 – 1.29]     | 1.07<br>[0.86 – 1.31]     | 1.07<br>[0.88 – 1.32]     |
| General social trust                   | 1.06 **<br>[1.01 – 1.11]  | 0.87<br>[0.62 – 1.19]       | 0.66 *<br>[0.47 – 0.92]      | 0.97<br>[0.72 – 1.31]       | 1.11<br>[0.87 – 1.41]      | 1.02<br>[0.92 – 1.14]     | 1.05<br>[0.76 – 1.44]       | 0.82<br>[0.63 – 1.07]     | 1.05<br>[0.78 – 1.42]       | 1.19<br>[0.87 – 1.67]        | 0.99<br>[0.81 – 1.22]     | 0.99<br>[0.79 – 1.24]     | 1.00<br>[0.81 – 1.24]     |
| General trust: Experts                 | 1.37 ***<br>[1.30 – 1.44] | 1.21<br>[0.89 – 1.63]       | 1.25<br>[0.85 – 1.83]        | 1.27<br>[0.92 – 1.74]       | 1.53 ***<br>[1.20 – 1.96]  | 1.17 **<br>[1.04 – 1.31]  | 1.56 **<br>[1.12 – 2.19]    | 1.28<br>[0.97 – 1.69]     | 1.51 **<br>[1.12 – 2.05]    | 1.16<br>[0.84 – 1.59]        | 1.44 **<br>[1.15 – 1.82]  | 1.44 **<br>[1.12 – 1.85]  | 1.28 *<br>[1.01 – 1.61]   |
| General trust: Govt                    | 1.01<br>[0.95 – 1.07]     | 1.03<br>[0.72 – 1.47]       | 0.71<br>[0.46 – 1.10]        | 1.76 **<br>[1.20 – 2.62]    | 0.96<br>[0.71 – 1.30]      | 1.16<br>[0.99 – 1.35]     | 1.16<br>[0.78 – 1.72]       | 0.88<br>[0.66 – 1.18]     | 0.56 ***<br>[0.40 – 0.77]   | 1.29<br>[0.86 – 1.97]        | 0.91<br>[0.70 – 1.18]     | 0.97<br>[0.72 – 1.30]     | 1.06<br>[0.77 – 1.45]     |
| COVID trust: Politicians               | 1.09 *<br>[1.01 – 1.17]   | 0.94<br>[0.59 – 1.49]       | 1.23<br>[0.75 – 2.02]        | 0.57 *<br>[0.36 – 0.89]     | 1.32<br>[0.93 – 1.90]      | 1.10<br>[0.94 – 1.29]     | 0.89<br>[0.55 – 1.44]       | 1.13<br>[0.75 – 1.72]     | 1.27<br>[0.89 – 1.82]       | 0.94<br>[0.60 – 1.47]        | 1.14<br>[0.83 – 1.55]     | 1.56 *<br>[1.10 – 2.22]   | 0.78<br>[0.54 – 1.11]     |
| COVID Trust: National sci/med advisors | 1.28 ***<br>[1.21 – 1.36] | 1.27<br>[0.85 – 1.92]       | 0.99<br>[0.60 – 1.62]        | 1.03<br>[0.69 – 1.51]       | 1.68 ***<br>[1.24 – 2.30]  | 1.32 ***<br>[1.14 – 1.52] | 0.79<br>[0.51 – 1.24]       | 1.08<br>[0.77 – 1.53]     | 0.88<br>[0.61 – 1.28]       | 1.12<br>[0.78 – 1.61]        | 1.02<br>[0.77 – 1.35]     | 1.33<br>[0.97 – 1.83]     | 1.37<br>[0.99 – 1.91]     |
| COVID Trust: Independent scientists    | 0.98<br>[0.93 – 1.04]     | 1.08<br>[0.76 – 1.53]       | 1.03<br>[0.69 – 1.51]        | 0.97<br>[0.68 – 1.36]       | 0.77<br>[0.58 – 1.02]      | 0.95<br>[0.85 – 1.07]     | 1.10<br>[0.78 – 1.54]       | 1.22<br>[0.88 – 1.70]     | 1.25<br>[0.89 – 1.74]       | 1.25<br>[0.89 – 1.74]        | 1.26<br>[0.99 – 1.58]     | 0.95<br>[0.73 – 1.22]     | 0.98<br>[0.77 – 1.23]     |
| COVID Trust: WHO                       | 1.21 ***<br>[1.14 – 1.27] | 1.32<br>[0.93 – 1.85]       | 1.27<br>[0.85 – 1.89]        | 1.05<br>[0.74 – 1.47]       | 1.12<br>[0.84 – 1.49]      | 1.11<br>[0.98 – 1.26]     | 1.32<br>[0.89 – 1.92]       | 0.86<br>[0.63 – 1.15]     | 0.91<br>[0.66 – 1.23]       | 1.28<br>[0.92 – 1.78]        | 1.60 ***<br>[1.25 – 2.05] | 1.09<br>[0.84 – 1.41]     | 1.13<br>[0.88 – 1.45]     |
| Personal efficacy                      | 1.02<br>[0.98 – 1.07]     | 1.06<br>[0.76 – 1.47]       | 0.96<br>[0.70 – 1.30]        | 0.97<br>[0.71 – 1.32]       | 0.86<br>[0.66 – 1.11]      | 0.92<br>[0.82 – 1.02]     | 1.16<br>[0.82 – 1.66]       | 0.82<br>[0.62 – 1.07]     | 0.95<br>[0.69 – 1.31]       | 0.83<br>[0.57 – 1.16]        | 0.86<br>[0.66 – 1.10]     | 0.79 *<br>[0.63 – 0.99]   | 0.99<br>[0.80 – 1.22]     |
| Govt efficacy                          | 0.98<br>[0.92 – 1.05]     | 0.86<br>[0.55 – 1.33]       | 1.41<br>[0.97 – 2.06]        | 1.44<br>[0.96 – 2.20]       | 0.96<br>[0.69 – 1.33]      | 1.05<br>[0.91 – 1.21]     | 1.25<br>[0.82 – 1.91]       | 1.21<br>[0.81 – 1.81]     | 1.27<br>[0.87 – 1.85]       | 0.94<br>[0.61 – 1.47]        | 0.90<br>[0.67 – 1.21]     | 0.77<br>[0.56 – 1.06]     | 1.11<br>[0.81 – 1.51]     |
| Perceived infection risk               | 1.07 **<br>[1.02 – 1.12]  | 1.01<br>[0.74 – 1.37]       | 1.22<br>[0.89 – 1.69]        | 1.20<br>[0.91 – 1.58]       | 1.15<br>[0.91 – 1.45]      | 1.18 **<br>[1.06 – 1.31]  | 1.14<br>[0.83 – 1.56]       | 1.22<br>[0.96 – 1.55]     | 1.13<br>[0.84 – 1.50]       | 1.45 *<br>[1.04 – 2.01]      | 1.14<br>[0.91 – 1.41]     | 1.31 *<br>[1.05 – 1.63]   | 0.88<br>[0.71 – 1.08]     |
| Worry about COVID-19                   | 1.37 ***<br>[1.31 – 1.43] | 1.52 **<br>[1.15 – 2.03]    | 1.41 *<br>[1.05 – 1.91]      | 1.23<br>[0.92 – 1.64]       | 1.21<br>[0.96 – 1.52]      | 1.20 ***<br>[1.08 – 1.34] | 1.43 *<br>[1.09 – 1.89]     | 0.99<br>[0.78 – 1.25]     | 1.17<br>[0.88 – 1.53]       | 1.33<br>[0.98 – 1.81]        | 1.26 *<br>[1.01 – 1.57]   | 1.17<br>[0.95 – 1.45]     | 1.59 ***<br>[1.28 – 1.98] |
| Observations                           | 19248                     | 643                         | 641                          | 669                         | 667                        | 2969                      | 532                         | 590                       | 677                         | 625                          | 683                       | 653                       | 656                       |
| R <sup>2</sup> Tjur                    | 0.129                     | 0.109                       | 0.162                        | 0.069                       | 0.136                      | 0.118                     | 0.142                       | 0.076                     | 0.073                       | 0.104                        | 0.184                     | 0.113                     | 0.123                     |

Odd ratios [95CI] shown, all continuous measure were standardized (scaled and mean-centered) prior to analysis. For space, samples are defined by their two character ISO country code and a letter denoting participant source (D, Dynata; R, Respondi; P, Prolific). <sup>a</sup>Gender is unstandardized. Political orientation data was not collected in France, this sample is excluded from pooled data. \*p < .05, \*\*p < .01, \*\*\* p < .001



Table S9

Full logistic regression results from model predicting vaccine recommendation to vulnerable others, UK and US samples

|                                        | UK_P (Mar)<br>OR             | UK_P (May)<br>OR             | UK_P (Jul)<br>OR            | UK_P (Sep)<br>OR          | UK_R (May)<br>OR           | UK_R (Jul)<br>OR           | UK_R (Sep)<br>OR          | UK_R (Oct)<br>OR          | US_P (Mar)<br>OR            | US_R (May)<br>OR           |
|----------------------------------------|------------------------------|------------------------------|-----------------------------|---------------------------|----------------------------|----------------------------|---------------------------|---------------------------|-----------------------------|----------------------------|
| (Intercept)                            | 16.28 ***<br>[10.45 – 26.82] | 15.62 ***<br>[11.10 – 22.65] | 10.85 ***<br>[8.19 – 14.66] | 6.58 ***<br>[5.39 – 8.10] | 8.67 ***<br>[6.49 – 11.82] | 8.43 ***<br>[6.45 – 11.22] | 6.69 ***<br>[5.45 – 8.30] | 5.76 ***<br>[4.71 – 7.11] | 11.92 ***<br>[8.03 – 18.40] | 8.08 ***<br>[5.62 – 11.97] |
| Age                                    | 1.03<br>[0.76 – 1.39]        | 1.32<br>[0.98 – 1.81]        | 1.05<br>[0.86 – 1.30]       | 1.06<br>[0.93 – 1.22]     | 1.33 **<br>[1.07 – 1.65]   | 1.54 **<br>[1.16 – 2.05]   | 1.49 ***<br>[1.26 – 1.78] | 1.39 **<br>[1.13 – 1.71]  | 0.84<br>[0.64 – 1.09]       | 1.47<br>[0.97 – 2.23]      |
| Gender (Female)                        | 0.85<br>[0.46 – 1.55]        | 0.46 ***<br>[0.30 – 0.69]    | 0.57 **<br>[0.40 – 0.82]    | 0.57 ***<br>[0.44 – 0.74] | 0.85<br>[0.58 – 1.24]      | 0.91<br>[0.64 – 1.31]      | 0.63 ***<br>[0.48 – 0.82] | 0.51 ***<br>[0.39 – 0.66] | 0.67<br>[0.40 – 1.12]       | 0.73<br>[0.46 – 1.14]      |
| Education                              | 1.21<br>[0.89 – 1.62]        | 0.97<br>[0.79 – 1.18]        | 1.15<br>[0.96 – 1.37]       | 1.02<br>[0.89 – 1.16]     | 1.06<br>[0.87 – 1.29]      | 1.11<br>[0.93 – 1.33]      | 1.04<br>[0.91 – 1.19]     | 1.08<br>[0.95 – 1.24]     | 1.27<br>[0.98 – 1.64]       | 1.26 *<br>[1.00 – 1.60]    |
| Numeracy                               | 1.44 *<br>[1.05 – 2.02]      | 1.00<br>[0.82 – 1.22]        | 1.14<br>[0.95 – 1.37]       | 1.14<br>[1.00 – 1.31]     | 1.11<br>[0.92 – 1.35]      | 0.99<br>[0.83 – 1.19]      | 1.06<br>[0.93 – 1.22]     | 1.07<br>[0.94 – 1.22]     | 1.26<br>[0.96 – 1.66]       | 1.35 *<br>[1.06 – 1.73]    |
| Politics (Conservative)                | 1.04<br>[0.74 – 1.46]        | 1.05<br>[0.84 – 1.32]        | 1.01<br>[0.82 – 1.25]       | 0.88<br>[0.76 – 1.02]     | 1.14<br>[0.92 – 1.41]      | 1.01<br>[0.83 – 1.24]      | 0.98<br>[0.85 – 1.14]     | 0.86 *<br>[0.75 – 1.00]   | 0.81<br>[0.60 – 1.09]       | 0.78<br>[0.59 – 1.05]      |
| Prosociality                           | 0.82<br>[0.60 – 1.09]        | 1.23 *<br>[1.01 – 1.50]      | 1.06<br>[0.89 – 1.25]       | 1.07<br>[0.94 – 1.23]     | 1.00<br>[0.82 – 1.22]      | 1.10<br>[0.91 – 1.32]      | 1.06<br>[0.92 – 1.22]     | 1.08<br>[0.94 – 1.24]     | 0.97<br>[0.75 – 1.25]       | 1.18<br>[0.92 – 1.50]      |
| General social trust                   | 1.05<br>[0.77 – 1.43]        | 1.09<br>[0.87 – 1.36]        | 1.12<br>[0.92 – 1.37]       | 1.08<br>[0.94 – 1.23]     | 1.12<br>[0.91 – 1.39]      | 1.00<br>[0.82 – 1.22]      | 1.08<br>[0.93 – 1.24]     | 0.98<br>[0.86 – 1.13]     | 1.18<br>[0.89 – 1.58]       | 0.97<br>[0.76 – 1.25]      |
| General trust: Experts                 | 1.21<br>[0.87 – 1.69]        | 1.62 ***<br>[1.28 – 2.05]    | 1.28 *<br>[1.05 – 1.55]     | 1.39 ***<br>[1.19 – 1.62] | 1.32 *<br>[1.05 – 1.66]    | 1.51 ***<br>[1.24 – 1.85]  | 1.34 ***<br>[1.15 – 1.57] | 1.58 ***<br>[1.35 – 1.86] | 1.62 **<br>[1.17 – 2.27]    | 1.35<br>[0.99 – 1.84]      |
| General trust:Govt                     | 1.36<br>[0.90 – 2.06]        | 0.85<br>[0.64 – 1.13]        | 1.20<br>[0.93 – 1.53]       | 1.14<br>[0.96 – 1.37]     | 1.11<br>[0.86 – 1.44]      | 1.18<br>[0.92 – 1.51]      | 1.19<br>[0.98 – 1.44]     | 0.95<br>[0.79 – 1.13]     | 0.78<br>[0.55 – 1.08]       | 0.90<br>[0.66 – 1.22]      |
| COVID trust: Politicians               | 0.92<br>[0.55 – 1.53]        | 1.28<br>[0.91 – 1.83]        | 0.97<br>[0.71 – 1.32]       | 1.04<br>[0.84 – 1.30]     | 1.00<br>[0.73 – 1.36]      | 0.80<br>[0.57 – 1.13]      | 1.00<br>[0.79 – 1.28]     | 1.33 *<br>[1.06 – 1.68]   | 1.19<br>[0.77 – 1.81]       | 1.10<br>[0.77 – 1.57]      |
| COVID Trust: National sci/med advisors | 1.36<br>[0.90 – 2.07]        | 1.41 *<br>[1.07 – 1.85]      | 1.26 *<br>[1.00 – 1.58]     | 1.08<br>[0.91 – 1.29]     | 1.16<br>[0.88 – 1.52]      | 1.20<br>[0.91 – 1.58]      | 1.43 ***<br>[1.17 – 1.74] | 1.22 *<br>[1.00 – 1.49]   | 1.09<br>[0.75 – 1.55]       | 2.12 ***<br>[1.50 – 3.02]  |
| COVID Trust: Independent scientists    | 1.17<br>[0.83 – 1.64]        | 0.91<br>[0.72 – 1.15]        | 0.87<br>[0.70 – 1.06]       | 1.03<br>[0.88 – 1.20]     | 0.84<br>[0.65 – 1.07]      | 1.09<br>[0.86 – 1.37]      | 0.85<br>[0.71 – 1.01]     | 1.10<br>[0.93 – 1.30]     | 1.15<br>[0.86 – 1.53]       | 0.80<br>[0.60 – 1.07]      |
| COVID Trust: WHO                       | 1.05<br>[0.73 – 1.51]        | 1.39 **<br>[1.11 – 1.75]     | 1.54 ***<br>[1.25 – 1.90]   | 1.37 ***<br>[1.16 – 1.60] | 1.64 ***<br>[1.29 – 2.09]  | 1.19<br>[0.94 – 1.51]      | 1.15<br>[0.95 – 1.37]     | 0.91<br>[0.75 – 1.10]     | 1.30<br>[0.96 – 1.75]       | 1.06<br>[0.76 – 1.47]      |
| Personal efficacy                      | 1.12<br>[0.84 – 1.50]        | 1.11<br>[0.91 – 1.36]        | 1.14<br>[0.95 – 1.35]       | 1.00<br>[0.87 – 1.16]     | 1.02<br>[0.83 – 1.26]      | 1.18<br>[0.96 – 1.43]      | 1.16 *<br>[1.00 – 1.35]   | 1.14<br>[0.99 – 1.32]     | 1.19<br>[0.92 – 1.53]       | 1.14<br>[0.88 – 1.49]      |
| Govt efficacy                          | 0.88<br>[0.57 – 1.36]        | 0.75<br>[0.56 – 1.01]        | 1.07<br>[0.81 – 1.42]       | 1.03<br>[0.85 – 1.26]     | 0.97<br>[0.74 – 1.28]      | 1.06<br>[0.78 – 1.46]      | 0.90<br>[0.72 – 1.12]     | 1.02<br>[0.83 – 1.25]     | 0.95<br>[0.66 – 1.39]       | 0.90<br>[0.64 – 1.27]      |
| Perceived infection risk               | 0.94<br>[0.69 – 1.28]        | 1.56 ***<br>[1.25 – 1.94]    | 1.26 *<br>[1.03 – 1.53]     | 1.05<br>[0.91 – 1.22]     | 1.03<br>[0.84 – 1.26]      | 0.93<br>[0.76 – 1.14]      | 0.99<br>[0.85 – 1.15]     | 1.01<br>[0.88 – 1.16]     | 0.98<br>[0.73 – 1.31]       | 1.21<br>[0.92 – 1.58]      |
| Worry about COVID                      | 1.21<br>[0.89 – 1.62]        | 1.04<br>[0.84 – 1.28]        | 1.13<br>[0.93 – 1.37]       | 1.39 ***<br>[1.20 – 1.61] | 1.64 ***<br>[1.36 – 1.99]  | 1.53 ***<br>[1.26 – 1.87]  | 1.42 ***<br>[1.23 – 1.65] | 1.35 ***<br>[1.16 – 1.57] | 1.23<br>[0.92 – 1.64]       | 1.17<br>[0.90 – 1.53]      |
| Observations                           | 698                          | 1143                         | 1315                        | 1846                      | 1097                       | 1254                       | 1778                      | 1704                      | 694                         | 683                        |
| R <sup>2</sup> Tjur                    | 0.086                        | 0.181                        | 0.169                       | 0.167                     | 0.183                      | 0.183                      | 0.159                     | 0.182                     | 0.2                         | 0.265                      |

Odd ratios [95CI] shown, all continuous measure were standardized (scaled and mean-centered) prior to analysis. For space, samples are defined by their two character ISO country code and a letter denoting participant source (D, Dynata; R, ResponDi; P, Prolific). <sup>a</sup>Gender is unstandardized. \*p < .05, \*\*p < .01, \*\*\* p < .001

Table S10

Result of logistic regression models predicting vaccine acceptance, including or excluding general vaccine attitudes.

|                                        | Base model                |                           |                           | Including general vaccine attitudes |                           |                           |
|----------------------------------------|---------------------------|---------------------------|---------------------------|-------------------------------------|---------------------------|---------------------------|
|                                        | UK Prolific (Sep)         | UK Respondi (Sep)         | UK Respondi (Oct)         | UK Prolific (Sep)                   | UK Respondi (Sep)         | UK Respondi (Oct)         |
|                                        | OR                        | OR                        | OR                        | OR                                  | OR                        | OR                        |
| (Intercept)                            | 4.16 ***<br>[3.48 – 4.99] | 5.55 ***<br>[4.56 – 6.79] | 4.94 ***<br>[4.07 – 6.03] | 4.29 ***<br>[3.58 – 5.19]           | 6.18 ***<br>[5.02 – 7.68] | 5.40 ***<br>[4.40 – 6.69] |
| Age                                    | 1.12<br>[0.99 – 1.28]     | 1.48 ***<br>[1.26 – 1.75] | 1.60 ***<br>[1.31 – 1.95] | 1.16 *<br>[1.02 – 1.32]             | 1.40 ***<br>[1.18 – 1.66] | 1.41 **<br>[1.14 – 1.74]  |
| Gender (Female)                        | 0.61 ***<br>[0.48 – 0.78] | 0.50 ***<br>[0.39 – 0.65] | 0.44 ***<br>[0.34 – 0.57] | 0.62 ***<br>[0.48 – 0.79]           | 0.49 ***<br>[0.38 – 0.64] | 0.44 ***<br>[0.33 – 0.57] |
| Education                              | 1.02<br>[0.91 – 1.15]     | 1.11<br>[0.98 – 1.26]     | 1.18 *<br>[1.04 – 1.34]   | 1.00<br>[0.88 – 1.13]               | 1.07<br>[0.94 – 1.23]     | 1.15 *<br>[1.00 – 1.32]   |
| Numeracy                               | 1.11<br>[0.98 – 1.26]     | 1.00<br>[0.88 – 1.14]     | 1.00<br>[0.88 – 1.13]     | 1.05<br>[0.93 – 1.19]               | 0.93<br>[0.82 – 1.06]     | 0.87 *<br>[0.76 – 1.00]   |
| Politics (Conservative)                | 0.84 *<br>[0.74 – 0.97]   | 0.88<br>[0.77 – 1.01]     | 0.86 *<br>[0.74 – 0.98]   | 0.85 *<br>[0.73 – 0.98]             | 0.86<br>[0.75 – 1.00]     | 0.84 *<br>[0.73 – 0.98]   |
| Prosociality                           | 1.11<br>[0.98 – 1.26]     | 1.09<br>[0.96 – 1.25]     | 1.07<br>[0.94 – 1.23]     | 1.10<br>[0.96 – 1.25]               | 1.08<br>[0.94 – 1.24]     | 1.04<br>[0.90 – 1.20]     |
| General social trust                   | 1.03<br>[0.91 – 1.16]     | 1.09<br>[0.95 – 1.25]     | 0.97<br>[0.85 – 1.11]     | 1.03<br>[0.90 – 1.16]               | 1.04<br>[0.90 – 1.20]     | 0.96<br>[0.84 – 1.11]     |
| General trust: Experts                 | 1.39 ***<br>[1.21 – 1.61] | 1.24 **<br>[1.06 – 1.44]  | 1.45 ***<br>[1.24 – 1.69] | 1.29 ***<br>[1.11 – 1.50]           | 1.11<br>[0.95 – 1.31]     | 1.29 **<br>[1.09 – 1.52]  |
| General trust: Govt                    | 1.27 **<br>[1.07 – 1.50]  | 1.13<br>[0.94 – 1.36]     | 1.02<br>[0.86 – 1.21]     | 1.24 *<br>[1.04 – 1.47]             | 1.15<br>[0.95 – 1.39]     | 0.98<br>[0.82 – 1.18]     |
| COVID trust: Politicians               | 0.94<br>[0.77 – 1.14]     | 1.12<br>[0.90 – 1.41]     | 1.26 *<br>[1.02 – 1.57]   | 0.95<br>[0.78 – 1.17]               | 1.18<br>[0.93 – 1.49]     | 1.37 **<br>[1.09 – 1.72]  |
| COVID Trust: National sci/med advisors | 1.13<br>[0.97 – 1.33]     | 1.25 *<br>[1.04 – 1.50]   | 1.29 **<br>[1.07 – 1.56]  | 1.11<br>[0.94 – 1.31]               | 1.14<br>[0.94 – 1.38]     | 1.21<br>[0.98 – 1.48]     |
| COVID Trust: Independent scientists    | 0.93<br>[0.80 – 1.07]     | 0.88<br>[0.74 – 1.03]     | 1.00<br>[0.85 – 1.17]     | 0.95<br>[0.82 – 1.10]               | 0.89<br>[0.74 – 1.06]     | 0.96<br>[0.81 – 1.13]     |
| COVID Trust: WHO                       | 1.45 ***<br>[1.25 – 1.69] | 1.33 ***<br>[1.12 – 1.58] | 1.03<br>[0.87 – 1.23]     | 1.41 ***<br>[1.21 – 1.65]           | 1.33 **<br>[1.11 – 1.59]  | 1.02<br>[0.85 – 1.24]     |
| Personal efficacy                      | 1.10<br>[0.96 – 1.25]     | 1.03<br>[0.89 – 1.19]     | 1.03<br>[0.89 – 1.18]     | 1.06<br>[0.93 – 1.22]               | 1.00<br>[0.86 – 1.16]     | 0.98<br>[0.84 – 1.14]     |
| Govt efficacy                          | 1.01<br>[0.84 – 1.21]     | 0.95<br>[0.77 – 1.16]     | 1.04<br>[0.86 – 1.27]     | 1.01<br>[0.84 – 1.22]               | 0.95<br>[0.77 – 1.18]     | 1.08<br>[0.88 – 1.33]     |
| Perceived infection risk               | 1.04<br>[0.91 – 1.19]     | 1.08<br>[0.94 – 1.25]     | 0.98<br>[0.85 – 1.13]     | 1.02<br>[0.89 – 1.17]               | 1.12<br>[0.96 – 1.30]     | 0.96<br>[0.83 – 1.11]     |
| Worry about COVID                      | 1.36 ***<br>[1.19 – 1.57] | 1.56 ***<br>[1.35 – 1.80] | 1.44 ***<br>[1.24 – 1.66] | 1.36 ***<br>[1.18 – 1.56]           | 1.46 ***<br>[1.26 – 1.70] | 1.41 ***<br>[1.20 – 1.65] |
| General vaccine attitudes              |                           |                           |                           | 1.69 ***<br>[1.51 – 1.90]           | 2.10 ***<br>[1.85 – 2.38] | 2.31 ***<br>[2.01 – 2.65] |
| Observations                           | 1847                      | 1778                      | 1704                      | 1841                                | 1773                      | 1700                      |
| R <sup>2</sup> Tjur                    | 0.191                     | 0.173                     | 0.193                     | 0.235                               | 0.247                     | 0.281                     |

Odds ratios [95CI] based on standardized (scaled and mean centered) continuous variables except for gender which is unstandardized.

\*p &lt; .05, \*\*p &lt; .01, \*\*\* p &lt; .001

**STROBE 2007 (v4) checklist of items to be included in reports of observational studies in epidemiology\***  
**Checklist for cohort, case-control, and cross-sectional studies (combined)**

| Section/Topic             | Item # | Recommendation                                                                                                                                                                                                                                                                                                                                                                                                                                                         | Reported on page #      |
|---------------------------|--------|------------------------------------------------------------------------------------------------------------------------------------------------------------------------------------------------------------------------------------------------------------------------------------------------------------------------------------------------------------------------------------------------------------------------------------------------------------------------|-------------------------|
| Title and abstract        | 1      | (a) Indicate the study’s design with a commonly used term in the title or the abstract                                                                                                                                                                                                                                                                                                                                                                                 | 1                       |
|                           |        | (b) Provide in the abstract an informative and balanced summary of what was done and what was found                                                                                                                                                                                                                                                                                                                                                                    | 2                       |
| <b>Introduction</b>       |        |                                                                                                                                                                                                                                                                                                                                                                                                                                                                        |                         |
| Background/rationale      | 2      | Explain the scientific background and rationale for the investigation being reported                                                                                                                                                                                                                                                                                                                                                                                   | 4                       |
| Objectives                | 3      | State specific objectives, including any pre-specified hypotheses                                                                                                                                                                                                                                                                                                                                                                                                      | 6                       |
| <b>Methods</b>            |        |                                                                                                                                                                                                                                                                                                                                                                                                                                                                        |                         |
| Study design              | 4      | Present key elements of study design early in the paper                                                                                                                                                                                                                                                                                                                                                                                                                | 7                       |
| Setting                   | 5      | Describe the setting, locations, and relevant dates, including periods of recruitment, exposure, follow-up, and data collection                                                                                                                                                                                                                                                                                                                                        | 11                      |
| Participants              | 6      | (a) <i>Cohort study</i> —Give the eligibility criteria, and the sources and methods of selection of participants. Describe methods of follow-up<br><i>Case-control study</i> —Give the eligibility criteria, and the sources and methods of case ascertainment and control selection. Give the rationale for the choice of cases and controls<br><i>Cross-sectional study</i> —Give the eligibility criteria, and the sources and methods of selection of participants | 7                       |
|                           |        | (b) <i>Cohort study</i> —For matched studies, give matching criteria and number of exposed and unexposed<br><i>Case-control study</i> —For matched studies, give matching criteria and the number of controls per case                                                                                                                                                                                                                                                 | -                       |
| Variables                 | 7      | Clearly define all outcomes, exposures, predictors, potential confounders, and effect modifiers. Give diagnostic criteria, if applicable                                                                                                                                                                                                                                                                                                                               | 8, Table S1             |
| Data sources/ measurement | 8*     | For each variable of interest, give sources of data and details of methods of assessment (measurement). Describe comparability of assessment methods if there is more than one group                                                                                                                                                                                                                                                                                   | 7                       |
| Bias                      | 9      | Describe any efforts to address potential sources of bias                                                                                                                                                                                                                                                                                                                                                                                                              | 11                      |
| Study size                | 10     | Explain how the study size was arrived at                                                                                                                                                                                                                                                                                                                                                                                                                              | 7                       |
| Quantitative variables    | 11     | Explain how quantitative variables were handled in the analyses. If applicable, describe which groupings were chosen and why                                                                                                                                                                                                                                                                                                                                           | 8                       |
| Statistical methods       | 12     | (a) Describe all statistical methods, including those used to control for confounding                                                                                                                                                                                                                                                                                                                                                                                  | 11                      |
|                           |        | (b) Describe any methods used to examine subgroups and interactions                                                                                                                                                                                                                                                                                                                                                                                                    | 11                      |
|                           |        | (c) Explain how missing data were addressed                                                                                                                                                                                                                                                                                                                                                                                                                            | 10 (footnote), Table S3 |
|                           |        | (d) <i>Cohort study</i> —If applicable, explain how loss to follow-up was addressed                                                                                                                                                                                                                                                                                                                                                                                    | -                       |

|                          |     |                                                                                                                                                                                                                                                                                                                                                                                                               |                                                             |
|--------------------------|-----|---------------------------------------------------------------------------------------------------------------------------------------------------------------------------------------------------------------------------------------------------------------------------------------------------------------------------------------------------------------------------------------------------------------|-------------------------------------------------------------|
|                          |     | <i>Case-control study</i> —If applicable, explain how matching of cases and controls was addressed<br><i>Cross-sectional study</i> —If applicable, describe analytical methods taking account of sampling strategy<br>(e) Describe any sensitivity analyses                                                                                                                                                   | 12(footnote), Table S6                                      |
| <b>Results</b>           |     |                                                                                                                                                                                                                                                                                                                                                                                                               |                                                             |
| Participants             | 13* | (a) Report numbers of individuals at each stage of study—eg numbers potentially eligible, examined for eligibility, confirmed eligible, included in the study, completing follow-up, and analysed<br>(b) Give reasons for non-participation at each stage<br>(c) Consider use of a flow diagram                                                                                                               | 11 (Table 1), Tables S6,S7<br>7<br>-                        |
| Descriptive data         | 14* | (a) Give characteristics of study participants (eg demographic, clinical, social) and information on exposures and potential confounders<br>(b) Indicate number of participants with missing data for each variable of interest<br>(c) <i>Cohort study</i> —Summarise follow-up time (eg, average and total amount)                                                                                           | 11 (Table 1), Tables S4, S5<br>10 (footnote), Table S3<br>- |
| Outcome data             | 15* | <i>Cohort study</i> —Report numbers of outcome events or summary measures over time<br><i>Case-control study</i> —Report numbers in each exposure category, or summary measures of exposure<br><i>Cross-sectional study</i> —Report numbers of outcome events or summary measures                                                                                                                             | -<br>-<br>11                                                |
| Main results             | 16  | (a) Give unadjusted estimates and, if applicable, confounder-adjusted estimates and their precision (eg, 95% confidence interval). Make clear which confounders were adjusted for and why they were included<br>(b) Report category boundaries when continuous variables were categorized<br>(c) If relevant, consider translating estimates of relative risk into absolute risk for a meaningful time period | 12, Figure S1,<br>-<br>-                                    |
| Other analyses           | 17  | Report other analyses done—eg analyses of subgroups and interactions, and sensitivity analyses                                                                                                                                                                                                                                                                                                                |                                                             |
| <b>Discussion</b>        |     |                                                                                                                                                                                                                                                                                                                                                                                                               |                                                             |
| Key results              | 18  | Summarise key results with reference to study objectives                                                                                                                                                                                                                                                                                                                                                      | 14                                                          |
| Limitations              | 19  | Discuss limitations of the study, taking into account sources of potential bias or imprecision. Discuss both direction and magnitude of any potential bias                                                                                                                                                                                                                                                    | 16                                                          |
| Interpretation           | 20  | Give a cautious overall interpretation of results considering objectives, limitations, multiplicity of analyses, results from similar studies, and other relevant evidence                                                                                                                                                                                                                                    | 15                                                          |
| Generalisability         | 21  | Discuss the generalisability (external validity) of the study results                                                                                                                                                                                                                                                                                                                                         | 16                                                          |
| <b>Other information</b> |     |                                                                                                                                                                                                                                                                                                                                                                                                               |                                                             |
| Funding                  | 22  | Give the source of funding and the role of the funders for the present study and, if applicable, for the original study on which the present article is based                                                                                                                                                                                                                                                 | 20                                                          |



1  
2  
3  
4  
5  
6  
7  
8  
9  
10  
11  
12  
13  
14  
15  
16  
17  
18  
19  
20  
21  
22  
23  
24  
25  
26  
27  
28  
29  
30  
31  
32  
33  
34  
35  
36  
37  
38  
39  
40  
41  
42  
43  
44  
45  
46

\*Give information separately for cases and controls in case-control studies and, if applicable, for exposed and unexposed groups in cohort and cross-sectional studies.  
**Note:** An Explanation and Elaboration article discusses each checklist item and gives methodological background and published examples of transparent reporting. The STROBE checklist is best used in conjunction with this article (freely available on the Web sites of PLoS Medicine at <http://www.plosmedicine.org/>, Annals of Internal Medicine at <http://www.annals.org/>, and Epidemiology at <http://www.epidem.com/>). Information on the STROBE Initiative is available at [www.strobe-statement.org](http://www.strobe-statement.org).

For peer review only

# BMJ Open

## Correlates of intended COVID-19 vaccine acceptance across time and countries: Results from a series of cross-sectional surveys

|                                 |                                                                                                                                                                                                                                                                                                                                                                                                                                                                                                                                                                                                                                                                                                                                                                                                                                                                                                                                                                            |
|---------------------------------|----------------------------------------------------------------------------------------------------------------------------------------------------------------------------------------------------------------------------------------------------------------------------------------------------------------------------------------------------------------------------------------------------------------------------------------------------------------------------------------------------------------------------------------------------------------------------------------------------------------------------------------------------------------------------------------------------------------------------------------------------------------------------------------------------------------------------------------------------------------------------------------------------------------------------------------------------------------------------|
| Journal:                        | <i>BMJ Open</i>                                                                                                                                                                                                                                                                                                                                                                                                                                                                                                                                                                                                                                                                                                                                                                                                                                                                                                                                                            |
| Manuscript ID                   | bmjopen-2020-048025.R1                                                                                                                                                                                                                                                                                                                                                                                                                                                                                                                                                                                                                                                                                                                                                                                                                                                                                                                                                     |
| Article Type:                   | Original research                                                                                                                                                                                                                                                                                                                                                                                                                                                                                                                                                                                                                                                                                                                                                                                                                                                                                                                                                          |
| Date Submitted by the Author:   | 28-Apr-2021                                                                                                                                                                                                                                                                                                                                                                                                                                                                                                                                                                                                                                                                                                                                                                                                                                                                                                                                                                |
| Complete List of Authors:       | Kerr, John; University of Cambridge, Winton Centre for Risk and Evidence Communication; University of Cambridge, Department of Psychology<br>Schneider, Claudia; University of Cambridge, Winton Centre for Risk & Evidence Communication; University of Cambridge, Department of Psychology<br>Recchia, Gabriel; University of Cambridge, Winton Centre for Risk & Evidence Communication<br>Dryhurst, Sarah; University of Cambridge, Winton Centre for Risk & Evidence Communication<br>Sahlin, Ullrika; Lund University, Center of Environmental and Climate Sciences<br>Dufouil, Carole; University of Bordeaux, Bordeaux Population Health Research Center, U1219, Inserm; Centre Hospitalier Universitaire de Bordeaux, Pole de sante publique<br>Arwidson, Pierre; Santé publique France<br>Freeman, Alexandra; Cambridge University, Winton Centre for Risk & Evidence Communication<br>van der Linden, Sander; University of Cambridge, Department of Psychology |
| <b>Primary Subject Heading</b>: | Public health                                                                                                                                                                                                                                                                                                                                                                                                                                                                                                                                                                                                                                                                                                                                                                                                                                                                                                                                                              |
| Secondary Subject Heading:      | Infectious diseases, Public health                                                                                                                                                                                                                                                                                                                                                                                                                                                                                                                                                                                                                                                                                                                                                                                                                                                                                                                                         |
| Keywords:                       | COVID-19, Public health < INFECTIOUS DISEASES, PREVENTIVE MEDICINE                                                                                                                                                                                                                                                                                                                                                                                                                                                                                                                                                                                                                                                                                                                                                                                                                                                                                                         |
|                                 |                                                                                                                                                                                                                                                                                                                                                                                                                                                                                                                                                                                                                                                                                                                                                                                                                                                                                                                                                                            |

SCHOLARONE™  
Manuscripts



I, the Submitting Author has the right to grant and does grant on behalf of all authors of the Work (as defined in the below author licence), an exclusive licence and/or a non-exclusive licence for contributions from authors who are: i) UK Crown employees; ii) where BMJ has agreed a CC-BY licence shall apply, and/or iii) in accordance with the terms applicable for US Federal Government officers or employees acting as part of their official duties; on a worldwide, perpetual, irrevocable, royalty-free basis to BMJ Publishing Group Ltd ("BMJ") its licensees and where the relevant Journal is co-owned by BMJ to the co-owners of the Journal, to publish the Work in this journal and any other BMJ products and to exploit all rights, as set out in our [licence](#).

The Submitting Author accepts and understands that any supply made under these terms is made by BMJ to the Submitting Author unless you are acting as an employee on behalf of your employer or a postgraduate student of an affiliated institution which is paying any applicable article publishing charge ("APC") for Open Access articles. Where the Submitting Author wishes to make the Work available on an Open Access basis (and intends to pay the relevant APC), the terms of reuse of such Open Access shall be governed by a Creative Commons licence – details of these licences and which [Creative Commons](#) licence will apply to this Work are set out in our licence referred to above.

Other than as permitted in any relevant BMJ Author's Self Archiving Policies, I confirm this Work has not been accepted for publication elsewhere, is not being considered for publication elsewhere and does not duplicate material already published. I confirm all authors consent to publication of this Work and authorise the granting of this licence.

1  
2  
3  
4  
5  
6  
7  
8  
9

1  
2  
3  
4

## **Correlates of intended COVID-19 vaccine acceptance across time and countries: Results from a series of cross-sectional surveys**

10  
11  
12  
13  
14  
15  
16  
17  
18  
19

5  
6  
7  
8

John R. Kerr\*<sup>1,2</sup>, Claudia R. Schneider<sup>1,2</sup>, Gabriel Recchia<sup>2</sup>, Sarah Dryhurst<sup>2</sup>, Ullrika Sahlin<sup>3</sup>, Carole Dufouil<sup>4,5</sup>, Pierre Arwidson<sup>6</sup>, Alexandra L. J. Freeman<sup>2</sup>, and Sander van der Linden<sup>1,2</sup>

20  
21  
22  
23  
24  
25  
26  
27  
28  
29

9  
10  
11  
12  
13  
14  
15  
16  
17  
18

\*Corresponding author: [jk802@cam.ac.uk](mailto:jk802@cam.ac.uk); +44 7305481785

20  
21  
22  
23  
24  
25  
26  
27  
28  
29

9  
10  
11  
12  
13  
14  
15  
16  
17  
18

<sup>1</sup> Department of Psychology, School of Biological Sciences, University of Cambridge,  
Downing Street, CB2 3EB Cambridge, UK.

20  
21  
22  
23  
24  
25  
26  
27  
28  
29

9  
10  
11  
12  
13  
14  
15  
16  
17  
18

<sup>2</sup> Winton Centre for Risk and Evidence Communication, University of Cambridge,  
Wilberforce Road, CB3 0WA Cambridge, UK.

20  
21  
22  
23  
24  
25  
26  
27  
28  
29

9  
10  
11  
12  
13  
14  
15  
16  
17  
18

<sup>3</sup>Center of Environmental and Climate Sciences, Lund University, Lund, Sweden

20  
21  
22  
23  
24  
25  
26  
27  
28  
29

9  
10  
11  
12  
13  
14  
15  
16  
17  
18

<sup>4</sup>Univ. Bordeaux, Inserm, Bordeaux Population Health Research Center, UMR 1219, Inserm,  
Bordeaux, France

20  
21  
22  
23  
24  
25  
26  
27  
28  
29

9  
10  
11  
12  
13  
14  
15  
16  
17  
18

<sup>5</sup>Pole de sante publique Centre Hospitalier Universitaire (CHU) de Bordeaux,  
Bordeaux, France.

20  
21  
22  
23  
24  
25  
26  
27  
28  
29

9  
10  
11  
12  
13  
14  
15  
16  
17  
18

<sup>6</sup>Santé publique France, Saint-Maurice, France

20  
21  
22  
23  
24  
25  
26  
27  
28  
29

9  
10  
11  
12  
13  
14  
15  
16  
17  
18

Word count: 4,863

**ABSTRACT**

1  
2  
3  
4  
5  
6  
7  
8  
9  
10  
11  
12  
13  
14  
15  
16  
17  
18  
19  
20  
21  
22  
23  
24  
25  
26  
27  
28  
29  
30  
31  
32  
33  
34  
35  
36  
37  
38  
39  
40  
41  
42  
43  
44  
45  
46  
47  
48  
49  
50  
51  
52  
53  
54  
55  
56  
57  
58  
59  
60

1  
2  
3  
4  
5  
6  
7  
8  
9  
10  
11  
12  
13  
14  
15  
16  
17  
18  
19  
20  
21  
22  
23  
24  
25  
26  
27  
28  
29  
30  
31  
32  
33  
34  
35  
36  
37  
38  
39  
40  
41  
42  
43  
44  
45  
46  
47  
48  
49  
50  
51  
52  
53  
54  
55  
56  
57  
58  
59  
60

Objective: Describe demographic, social, and psychological correlates of willingness to receive a COVID-19 vaccine.

Setting: Series of online surveys undertaken between March and October 2020.

Participants: A total of 25 separate national samples (matched to country population by age and sex) in 12 different countries were recruited through online panel providers ( $N = 25,334$ ).

Primary outcome measures: Reported willingness to receive a COVID-19 vaccination.

Results: Reported willingness to receive a vaccine varied widely across samples, ranging from 63% to 88%. Multivariate logistic regression analyses reveal sex (female OR = 0.59, 95%CI [0.55, 0.64]), trust in medical and scientific experts (OR = 1.27, [1.22, 1.33]), and worry about the COVID-19 virus (OR = 1.49, [1.43, 1.55]) as the strongest correlates of stated vaccine acceptance considering pooled data, and the most consistent correlates across countries. In a subset of UK samples we show that these effects are robust after controlling for attitudes towards vaccination in general.

Conclusions: Our results indicate that the burden of trust largely rests on the shoulders of the scientific and medical community, with implications for how future COVID-19 vaccination information should be communicated to maximize uptake.

Keywords: Vaccination, vaccine hesitancy, COVID-19, risk, trust.

## 1 ARTICLE SUMMARY

### 2 Strengths and limitations of this study

- 3 • To examine predictors of vaccine acceptance we collected data from a large number of  
4 participants in several different countries and at different time points.
- 5 • We examine a range of demographic, risk and trust-related predictors using multivariate  
6 models.
- 7 • Samples were quota matched (age and gender) to country population, but not  
8 probability sampled.
- 9 • At the time of the surveys no COVID-19 vaccine was publicly available, thus stated  
10 acceptance is hypothetical, and may change with provision of more information about  
11 current vaccines.

## 1 INTRODUCTION

2 COVID-19 has resulted in over 2.5 million deaths globally, illness for millions more,  
3 and unprecedented social and economic disruption[1,2]. Many governments have signaled  
4 that mass vaccination against the virus is the most straightforward—and possibly only—route  
5 to normality and stability[3,4]. While recent announcements of effective vaccines[5,6] and  
6 their rollout to certain demographics in some countries is promising[7], the wider impact of  
7 vaccines on preventing the spread of disease is dependent on broad uptake within a given  
8 population. In order to achieve ‘herd immunity’, enough people in a population must be  
9 immune to prevent the spread of a disease among non-immune individuals. The proportion  
10 varies depending on a number of factors including how infectious the contagion is, its  
11 prevalence in a population, and the variation in individual susceptibility or exposure to  
12 infection[8]. Estimates for the level of immunity required for COVID-19 herd immunity have  
13 ranged from 50% to 80% of the population, acquired through either natural infection and  
14 recovery, or through vaccination[9,10]. It must be noted that, while there is evidence that  
15 currently available vaccines can reduce SARS-CoV-2 infections [11], there is only limited  
16 preliminary evidence that vaccination can reduce transmission of the virus at the time of  
17 writing [12]. Thus, the net impact of vaccination campaigns on the spread of the virus  
18 remains uncertain until more research is conducted [13].

19 Vaccine hesitancy—defined as a delay in acceptance or refusal of vaccines despite  
20 availability[14]—poses a challenge to achieving herd immunity. If a sufficient number of  
21 people in a population reject vaccination—and herd immunity is not achieved—the virus will  
22 continue to circulate among susceptible individuals, including those who are unable to be  
23 vaccinated for medical reasons. The WHO identified vaccine hesitancy as one of the top 10  
24 threats to global health in 2019[15], and in the pressing context of COVID-19, understanding  
25 vaccine hesitancy has only grown in importance[16].

1  
2  
3 1 Public health researchers concerned with uptake of vaccination have understandably  
4  
5 2 sought to uncover the drivers of vaccine hesitancy. By identifying antecedents of vaccine  
6  
7 3 hesitancy, policy makers, public health officials, and professional communicators can target  
8  
9 4 interventions to increase uptake of vaccines and ultimately reduce the burden of disease in a  
10  
11 5 population[4]. However, strategies developed for campaigns targeting diseases with well-  
12  
13 6 established vaccines (e.g. MMR, pertussis) may not fully translate to a pandemic context  
14  
15 7 where there is greater uncertainty, less information available, and where institutional trust  
16  
17 8 plays a greater role—as was noted in the wake of the 2009 H1N1 influenza pandemic[17].  
18  
19  
20  
21

22 9 Recent evidence shows that acceptance of a COVID-19 vaccine is far from universal  
23  
24 10 in many countries. Lazarus et al[18] conducted a series of surveys across 19 countries in June  
25  
26 11 2020, asking respondents how much they agreed with the following statement: ‘If a COVID-  
27  
28 12 19 vaccine is proven safe and effective and is available, I will take it’. The proportion of  
29  
30 13 respondents who agreed ranged from 88.6% (China) to 55.8% (Russia). Examining possible  
31  
32 14 predictors of vaccine acceptance, the authors report that men, older people, and those who  
33  
34 15 express greater trust in the government were more likely to express willingness to receive a  
35  
36 16 vaccine. The role of trust (in science, the government or the medical system) is a recurring  
37  
38 17 theme in many other recent studies which have examined COVID-19 vaccine hesitancy in  
39  
40 18 individual countries[19–27]. For example, Palamenghi et al[24] report that across two large  
41  
42 19 random samples of the Italian population, trust in science was positively correlated ( $r = .37$ )  
43  
44 20 with willingness to receive a COVID-19 vaccine. Frank and Arim[20] report that Canadians  
45  
46 21 who are more trusting of local and national government bodies are more likely to express  
47  
48 22 intentions to receive a vaccine if available, as are those who report high general social trust  
49  
50 23 (i.e. believing that ‘most people can be trusted’).  
51  
52  
53  
54  
55  
56

57 24 Such results align with pre-COVID studies which have highlighted the role of trust in  
58  
59 25 vaccination intentions and attitudes[17,28,29]. However, we note that recent studies  
60



1  
2  
3 1 examining COVID-19 vaccine intentions have typically only examined trust in one entity  
4  
5 2 (e.g. government or hospitals); research to date has not considered the possible overlap  
6  
7 3 between trust in the government, trust in science and medicine, and general social trust[30–  
8  
9 4 32]. There is also a question over the extent to which vaccine acceptance is linked to mistrust  
10  
11 5 in experts and authorities *regarding COVID-19 in particular*, or a more general lack of trust  
12  
13 6 in these actors. In order to target communications specifically designed to satisfy the  
14  
15 7 information needs of those who distrust official authorities, it is important to identify the  
16  
17 8 precise agents that they distrust (and, ideally, why).  
18  
19  
20  
21

22 9       Beyond trust, the perceived threat or risk posed by a given disease has also been  
23  
24 10 shown to predict vaccination attitudes. Models of health behavior, such as the Health Belief  
25  
26 11 Model[33] and Protection Motivation Theory[34], place the perceived risk or severity of a  
27  
28 12 disease as a key driver of vaccination intentions (and other preventative health  
29  
30 13 behaviors)[17,35]. Recent surveys in the US, Malaysia, and Israel have shown that perceived  
31  
32 14 risk and worry regarding the COVID-19 virus is associated with vaccine acceptance[36–38].  
33  
34 15 Other factors, such as the perceived benefits and costs as well as efficacy of protective  
35  
36 16 behaviors are also outlined in models of health behavior as predictors of engagement in a  
37  
38 17 given health behavior. However, until recently, little information about the possible costs,  
39  
40 18 distribution and efficacy of a COVID-19 vaccine was available, meaning that the public has  
41  
42 19 not generally been able to assess the potential benefits of a vaccine outside of a purely  
43  
44 20 hypothetical arena (although experimental work has examined the influence of these factors  
45  
46 21 on willingness to receive a vaccine[39]).  
47  
48  
49  
50  
51

52 22       There are also increasing concerns about the politicization of science and about  
53  
54 23 politics becoming entangled with vaccine beliefs and attitudes specifically, particularly in the  
55  
56 24 context of a pandemic where central government structures are deeply involved in all stages  
57  
58 25 of the public health response[17,40]. Prior research[41] has shown that the rhetoric adopted  
59  
60

1 by political elites on social media can fuel anti-vaccination attitudes amongst their followers  
2 and that ideologies can help explain anti-vaccination attitudes[37,42].

3 In the current study we present a more comprehensive international analysis of the  
4 role of key social, political, and psychological correlates of COVID-19 vaccine acceptance  
5 across 12 countries, with multiple national surveys in some countries (total  $N = 25,334$ , see  
6 Table 1). All samples were recruited via online panel providers using quotas to ensure  
7 samples were matched to the general population in terms of age and gender (with the  
8 exception of France, see methods). Unlike previous studies, we examine reported trust in a  
9 range of actors, both in general and specifically relating to the COVID-19 pandemic. We also  
10 include several demographic factors (including political orientation), numeracy (known to  
11 play a role in risk perceptions[43], and vaccine attitudes in particular[44]), affective (worry)  
12 and cognitive (perceived likelihood of infection) aspects of perceived COVID-19 risk[45],  
13 broad measures of perceived efficacy, and, in a subset of samples, general attitudes towards  
14 vaccines.

## 15 **METHODS**

### 16 **Participants and procedure**

17 Between March and October 2020, we fielded 25 separate surveys across 12  
18 countries. The majority of samples were recruited through an ISO certified international  
19 survey company Respondi (respondi.com). Our initial US and UK samples were recruited via  
20 Prolific (prolific.ac). Although some later samples from these countries were recruited via  
21 Respondi, we continued to also recruit Prolific samples to allow comparisons with our  
22 earliest data points in the pandemic. As we did not have matching Prolific and Respondi  
23 samples at each time point, and results differed slightly between these providers, we report  
24 these samples separately for transparency. Quota-based sampling ensured all samples  
25 broadly. were representative of each country's population in terms of age and gender, and, in

1  
2  
3 1 Prolific samples, ethnicity [46]. Recruitment was managed by these external providers and  
4  
5 2 exact response rates were not provided. However, Respondi provided a broad estimate of a  
6  
7 3 30% response rate across surveys (personal communication; Respondi, 2021). Participants  
8  
9 4 who had previously completed a survey were prevented from completing further surveys, so  
10  
11 5 all our samples represent different individuals. Participants who did not finish the survey  
12  
13 6 were excluded. Demographic details for each sample are shown in Table 1. For completeness  
14  
15 7 we include several samples in which vaccine acceptance was measured but the survey did not  
16  
17 8 include all the independent variables used in the models presented below. Surveys which did  
18  
19 9 not include all these variables are marked with a ‘\*’ in Table 1.  
20  
21  
22  
23  
24

25 10 All participants were directed via a study link to the Qualtrics platform, and provided  
26  
27 11 informed consent before completing the survey. This study was approved by the University  
28  
29 12 of Cambridge Psychology Research Ethics Committee (PRE.2020.034).  
30  
31

32 13 It is important to note that the surveys were conducted at various timepoints as the  
33  
34 14 pandemic unfolded in each country. Table 1 also reports the total number of COVID-19  
35  
36 15 deaths for each country at each survey timepoint, and the number of reported cases in the  
37  
38 16 week prior to the survey (with the caveat that reporting practices vary between countries). We  
39  
40 17 also provide the Stringency Index measure generated by the COVID-19 Government  
41  
42 18 Response Tracker [47], which is a 0-100 index based on various restrictions put in place by  
43  
44 19 governments to control the pandemic (e.g. closing schools, ‘shelter in place’ requirements).  
45  
46 20 External data were sourced from the COVID-19 Government Response Tracker [47] and Ali  
47  
48 21 et al. [48].  
49  
50  
51  
52

53 22 The information about potential vaccines also changed over the data collection period.  
54  
55 23 In February 2020, the first major vaccine candidates, the Moderna and Oxford AstraZeneca  
56  
57 24 vaccines, were announced [49,50]. In mid-2020 the launches of Phase III trials for several  
58  
59  
60

1 vaccines were announced: Moderna and Pfizer BioNTech in July [51], and AstraZeneca in  
2 August [52]. Results of Phase III clinical trials and estimates of efficacy were not announced  
3 during the data collection period (ending in October, 2020). No vaccines were approved for  
4 use by local regulators at the time(s) the surveys were conducted in each country.

## 5 **Materials**

6 Participants reported their age and gender, level of education (ranging from *No formal*  
7 *education above age 16 to PhD*), and political orientation (*Very liberal/left wing to Very*  
8 *conservative/right wing*). Numeracy was measured as a combined index of the 2-3 item  
9 adaptive form of the Berlin Numeracy Test [53] and an additional risk literacy item from  
10 Lipkus et al.[54].

11 Participants completed a widely used measure of general social trust (*Generally*  
12 *speaking, would you say most people can be trusted, or that you can't be too careful in*  
13 *dealing with people?*)[55] and a separate measure of prosociality (*To what extent do you think*  
14 *it's important to do things for the benefit of others and society even if they have some costs to*  
15 *you personally?*). Trust in experts and trust in government were each measured as the  
16 combined average of reported trust in three targets (experts: scientists, medical doctors and  
17 nurses, and scientific knowledge [Cronbach's  $\alpha$  .77-.86]; government: politicians, current  
18 government, civil servants [ $\alpha$  .73-.90]; all from *Cannot be trusted at all to Can be trusted a*  
19 *lot*). We also asked participants to report their trust in several actors with specific regard to  
20 the COVID-19 pandemic. Participants reported the extent to which they trust politicians in  
21 their country to 'deal effectively with the pandemic', and how much they separately trusted  
22 the country's national scientific and medical advisors, independent experts not connected  
23 with government, and the WHO to 'know the best measures to take in the face of the  
24 pandemic' (all from *Not at all to Very much*). Personal and government efficacy were  
25 captured by items asking participants the extent to which they felt that, respectively, their

1 own actions, and the actions of their country ‘to limit the spread of coronavirus can make a  
2 difference’ (*Not at all* to *Very much*). Perceived likelihood of infection was measured as an  
3 index of three related items (example: *I will probably get sick with the coronavirus/COVID-  
4 19; as .71-.89*). Participants also reported their level of worry about the virus (from *Not at all  
5 worried* to *Very worried*). In a subset of UK samples, we also asked participants about their  
6 general attitude towards vaccination, using two items from Lewandowsky et al.’s [42] scale  
7 (example: *I believe that vaccines are a safe and reliable way to help avert the spread of  
8 preventable diseases [rs .83-.87]*).

9 Participants’ vaccine acceptance was measured with the question: ‘*If a vaccine were  
10 to be available for the coronavirus/COVID-19 now, would you get vaccinated yourself?*’  
11 (*Yes/No*). Participants were also asked ‘*If a vaccine were to be available for the  
12 coronavirus/COVID-19 now: Would you recommend vulnerable friends/family to get  
13 vaccinated?*’ (*Yes/No*). Full item wording for all measures can be found in Table S1.

14 Surveys were translated from English to other languages by native speakers fluent in  
15 English.

## 16 **Analysis**

17 To examine the correlates of vaccine acceptance we fitted a multivariate logistic  
18 regression model to the data from each survey. To allow for descriptive comparisons between  
19 countries and across time, we report model results separately for each country, time point,  
20 and (in the UK) panel provider. We also report results from the model fitted to the pooled  
21 data from all surveys, and a supplementary multi-level model adjusting for survey-level  
22 variables (total number of cases and days since first case in country at time of survey). All  
23 analyses were conducted in R (v4.0.5).

## 1 RESULTS

2 Figure 1 shows the percentage of participants in each survey who responded that they  
3 would be willing to be vaccinated if a COVID-19 vaccine was available, or would  
4 recommend a vaccine to vulnerable others, given the options of 'Yes' or 'No'<sup>1</sup>. Across all  
5 samples, the percentage of respondents who stated they were willing to receive a vaccine  
6 ranged from 62.6% (Sweden, April) to 88.1% (Mexico, March), while the percentage of those  
7 who said they would recommend a vaccine to vulnerable others ranged from 67.5% (US,  
8 September) to 91.7% (UK, March). Descriptively, in every single sample the proportion of  
9 respondents stating a willingness to receive a vaccine was lower than the proportion who  
10 would recommend it to vulnerable others ( $M_{diff} = -5.79\%$ ,  $SD = 3.00$ ). We also note a trend of  
11 decreasing stated acceptance over time: in nearly all countries with multiple samples, vaccine  
12 acceptance in any given survey was lower than previous surveys of the same population. For  
13 example between March and May, 2020, stated vaccine acceptance among respondents in  
14 Mexico dropped from 88.1% to 73.9% (a Chi-Square test of independence indicated that this  
15 difference was statistically significant,  $\chi^2 = 42.44$ ,  $p < .001$ ) In the US, stated vaccine  
16 acceptance (among participants recruited through online panel provider Respondi) fell more  
17 than 12 percentage points, from 74.7% to 62.6%, between May and September, 2020 ( $\chi^2 =$   
18  $25.89$ ,  $p < .001$ ).

19 [FIGURE 1 HERE]

---

<sup>1</sup> Based on respondents who answered the question. In the Italy sample a number of participants were not presented with these items due to a technical error ( $n = 80$ , 11%). In the remaining samples the average proportion of missing responses for vaccine intention and recommendation items was 1% (see supplementary Tables S2 and S3 for description of missing data and the age and gender distribution of those participants who answered the vaccine acceptance item). We acknowledge that in some cases estimates of vaccine acceptance may not be based on samples exactly matched to a country's population age and gender distribution due to this missing data, but note that age and gender are controlled for in the models below.

1 Table 1.  
 2 Survey demographics, percentage of participants willing to receive a COVID-19 vaccine or to recommend it to vulnerable friends/family, and country-level  
 3 pandemic indicators.

| Country   | Source   | Date   | N    | M <sub>Age</sub> (SD) | Female (%) | Tertiary Educated (%) | Vaccine - acceptance (%) | Vaccine - Recommend (%) | Total deaths | Days since first case | Cases week prior | Stringency Index |
|-----------|----------|--------|------|-----------------------|------------|-----------------------|--------------------------|-------------------------|--------------|-----------------------|------------------|------------------|
| Australia | Dynata   | 20-Mar | 700  | 46.3 (16.4)           | 51.0       | 43.4                  | 82.9                     | 88.7                    | 7            | 55                    | 591              | 47.22            |
| China*    | Respondi | 09-Apr | 700  | 43.2 (14.3)           | 48.9       | 73.1                  | 85.8                     | 87.4                    | 3335         | 144                   | 276              | 56.94            |
| Germany   | Respondi | 23-Mar | 700  | 46.7 (15.9)           | 49.9       | 32.7                  | 80.8                     | 89.2                    | 123          | 56                    | 21784            | 76.85            |
| Spain     | Respondi | 22-Mar | 700  | 46.7 (15.0)           | 51.1       | 58.1                  | 83.6                     | 89.8                    | 1772         | 51                    | 20970            | 71.76            |
| Spain     | Respondi | 06-May | 700  | 46.0 (15.0)           | 50.4       | 57.0                  | 79.8                     | 82.5                    | 25857        | 96                    | 7408             | 81.94            |
| France    | BVA      | 03-Apr | 3002 | 48.8 (16.5)           | 52.5       | 71.1                  | 69.7                     | 80.7                    | 6496         | 98                    | 30979            | 87.96            |
| Italy     | Respondi | 22-Mar | 700  | 45.9 (14.8)           | 50.4       | 41.3                  | 85.3                     | 88.2                    | 5476         | 51                    | 34391            | 91.67            |
| Japan     | Respondi | 10-Apr | 699  | 48.1 (16.4)           | 50.9       | 53.3                  | 74.5                     | 80.1                    | 125          | 85                    | 3096             | 45.37            |
| S. Korea  | Respondi | 09-Apr | 700  | 45.3 (15.5)           | 49.0       | 70.5                  | 85.6                     | 88.4                    | 204          | 80                    | 447              | 82.41            |
| Mexico    | Respondi | 21-Mar | 693  | 38.7 (14.0)           | 50.5       | 66.4                  | 88.1                     | 90.3                    | 2            | 22                    | 210              | 8.33             |
| Mexico    | Respondi | 06-May | 700  | 38.6 (14.2)           | 51.0       | 75.8                  | 73.9                     | 75.6                    | 2704         | 68                    | 9835             | 82.41            |
| Sweden    | Respondi | 28-Mar | 700  | 45.5 (16.0)           | 49.1       | 40.3                  | 66.3                     | 77.2                    | 239          | 57                    | 1795             | 50.93            |
| Sweden    | Respondi | 17-Apr | 700  | 45.5 (16.5)           | 48.9       | 40.2                  | 63.4                     | 73.7                    | 1925         | 77                    | 3690             | 64.81            |
| UK        | Prolific | 19-Mar | 703  | 45.6 (15.7)           | 50.9       | 53.9                  | 80.4                     | 91.7                    | 162          | 48                    | 4719             | 31.48            |
| UK        | Prolific | 07-May | 1157 | 44.7 (15.7)           | 50.7       | 56.5                  | 80.4                     | 86.7                    | 30321        | 97                    | 25582            | 79.63            |
| UK        | Prolific | 06-Jul | 1325 | 44.5 (15.6)           | 52.5       | 58.5                  | 78.9                     | 85.3                    | 40643        | 157                   | 2461             | 64.35            |
| UK        | Prolific | 18-Sep | 1869 | 38.2 (15.0)           | 51.2       | 56.2                  | 73.0                     | 79.5                    | 41732        | 231                   | 24259            | 65.74            |
| UK        | Respondi | 07-May | 1150 | 45.7 (15.9)           | 52.0       | 43.4                  | 78.9                     | 84.2                    | 30321        | 97                    | 25582            | 79.63            |
| UK*       | Respondi | 08-Jun | 500  | 45.9 (15.9)           | 53.2       | 39.7                  | 79.0                     | 83.2                    | 38666        | 129                   | 7742             | 73.15            |
| UK        | Respondi | 06-Jul | 1326 | 45.4 (16.6)           | 51.7       | 44.9                  | 80.1                     | 84.4                    | 40643        | 157                   | 2461             | 64.35            |
| UK        | Respondi | 18-Sep | 1855 | 45.5 (16.1)           | 51.6       | 42.6                  | 75.7                     | 79.9                    | 41732        | 231                   | 24259            | 65.74            |
| UK        | Respondi | 29-Oct | 1744 | 46.7 (16.0)           | 52.2       | 42.0                  | 72.2                     | 76.1                    | 45955        | 272                   | 154873           | 75.00            |
| US        | Prolific | 19-Mar | 702  | 45.1 (15.8)           | 50.6       | 66.8                  | 75.7                     | 85.7                    | 264          | 58                    | 12077            | 67.13            |
| US        | Respondi | 07-May | 700  | 45.0 (16.1)           | 51.0       | 59.3                  | 74.7                     | 80.1                    | 78618        | 107                   | 187115           | 72.69            |
| US*       | Respondi | 28-Sep | 909  | 44.8 (15.6)           | 50.6       | 50.1                  | 62.6                     | 67.5                    | 205612       | 251                   | 288759           | 62.50            |

4 \*Indicates survey that included vaccine acceptance items but not all model predictor variables (excluded from analyses below).



1  
2  
3 1  
4  
5 2 We fitted a multivariate logistic regression model to data from each sample to identify  
6  
7 3 the correlates of COVID-19 vaccine intentions. Independent variables included: demographic  
8  
9 4 variables; an objective measure of numeracy, political ideology; general social trust;  
10  
11 5 prosociality (perceived importance of doing ‘things for the benefit of others and society’ even  
12  
13 6 at personal cost); general trust in medical and scientific experts; general trust in government;  
14  
15 7 specific trust in politicians to manage the pandemic; specific trust in (separately) national  
16  
17 8 science advisors, independent scientists and the WHO to ‘know the best measures to take in  
18  
19 9 the face of the pandemic’; the perceived efficacy of their own and their country’s actions to  
20  
21 10 limit the spread of the virus; perceived likelihood of infection; and, worry about COVID-19  
22  
23 11 (for details on measures see Methods section and Table S1; descriptive statistics are reported  
24  
25 12 in Table S4, and bivariate correlations in Figure S1). Continuous measures (i.e. all except  
26  
27 13 gender) were scaled and mean centered prior to analysis. Only complete observations were  
28  
29 14 included. Multicollinearity analyses indicated no issues arising from correlated predictors (all  
30  
31 15 variance inflation factor values < 4). To facilitate the interpretation of results we present odds  
32  
33 16 ratios in a heat map format in Figure 2. Full model results including confidence intervals can  
34  
35 17 be found in Table S5. Results of models investigating correlates of willingness to recommend  
36  
37 18 a vaccine to vulnerable others are also presented in supplementary materials (Figure S2,  
38  
39 19 Table S6). We fitted an additional multi-level model to the pooled data, adjusting for country,  
40  
41 20 month, days since first case and number of cases reported in each country at each time point  
42  
43 21 (Table S7). Fixed effects were essentially unchanged from those reported in the simpler  
44  
45 22 pooled model. Due to the low number of groups, estimates of random effects were unreliable  
46  
47 23 [56].  
48  
49  
50  
51  
52  
53  
54  
55

56 24 [FIGURE 2 HERE]  
57  
58  
59  
60



1  
2  
3 1 Considering the most consistent correlates of stated vaccine acceptance across  
4  
5 2 samples, we find that in most samples individuals who report a higher level of general trust in  
6  
7 3 experts ( $OR_{pooled} = 1.28$ , 95%CI [1.22, 1.34]), or who are more worried about the virus  
8  
9 4 ( $OR_{pooled} = 1.47$  [1.41 – 1.53]), are more likely to say that they would accept a vaccine. In  
10  
11 5 Germany, Spain, Mexico, Sweden (March only), and nearly all UK samples, females are  
12  
13 6 generally less likely to say that they would accept a COVID-19 vaccine if available ( $OR_{pooled}$   
14  
15 7 = 0.59, [0.55, 0.64])<sup>2</sup>. We also note that measures of efficacy, both at the personal ( $OR_{pooled} =$   
16  
17 8 1.00, [0.96 – 1.05]) and country level ( $OR_{pooled} = 1.01$ , [0.96, 1.08]), were not significantly  
18  
19 9 associated with reported vaccine acceptance in most samples.  
20  
21  
22  
23  
24

25 10 Our results reveal a great deal of heterogeneity in the relevance of correlates across  
26  
27 11 countries, but also across time in countries where we conducted multiple surveys. For  
28  
29 12 example, in the United States only a few consistent associations emerged. Most notably,  
30  
31 13 political conservatism was associated with a lower likelihood to accept a COVID-19 vaccine  
32  
33 14 in March ( $OR_{USA-Mar} = 0.73$  [0.57, 0.93];  $OR_{USA-May} = 0.77$  [0.58 – 1.01]) whereas trust in  
34  
35 15 experts ( $OR_{USA-Mar} = 1.53$  [1.16, 2.03];  $OR_{USA-May} = 1.36$  [1.02 – 1.82]) and personal worry  
36  
37 16 about the virus ( $OR_{USA-Mar} = 1.47$  [1.17, 1.87];  $OR_{USA-May} = 1.27$ , [0.99 – 1.64]) were  
38  
39 17 associated with increased vaccination intentions. In contrast, in the United Kingdom,  
40  
41 18 additional factors such as the role of age, gender, and prosociality played a significant role.  
42  
43 19 There was also variation over time. For example, although political ideology was not a  
44  
45 20 significant correlate in the UK in May or July 2020, conservatism was associated with lower  
46  
47 21 vaccination intentions from September 2020 onwards (ORs 0.85-.88), which may be related  
48  
49 22 to increased polarization. To illustrate the increasing strength of the association between  
50  
51 23 political ideology and vaccine acceptance over time in the UK, in Figure 3 we plot the  
52  
53  
54  
55  
56  
57

---

58 <sup>2</sup> UK data was over represented in our pooled sample. As a robustness check we also fitted the model to the  
59 pooled sample with UK data removed and report that the effects of gender, trust in experts and worry remain  
60 significant ( $ps < .001$ ; see Table S5).

1 predicted likelihood of reported vaccine acceptance across the political spectrum (holding all  
2 other variables constant).

3 [FIGURE 3 HERE]

4  
5 In the UK, we also report a different pattern of effects when comparing between  
6 samples collected via different providers, even where these were collected on the same day  
7 (in May, July, and September), were matched on age and gender, and controlling for a range  
8 of other demographic variables. This underscores the caution that must be applied when  
9 studies generalize results from a single survey sample (particularly an online survey).

10 In terms of variance explained, the variables in our model explained approximately  
11 10-30% of the variance in the likelihood of vaccine acceptance vs refusal, with the exception  
12 of samples recruited in South Korea (4%) and Japan (8%).

#### 14 **Accounting for general vaccine attitudes**

15 To examine the extent to which the effects in our model can be accounted for by a  
16 negative perception of vaccines in general, we conducted an additional set of analyses. In our  
17 three most recent UK surveys we included a two-item measure of general vaccine attitudes  
18 (adapted from Lewandowsky et al.[42]). A comparison of results from models with or  
19 without general vaccine attitudes as an independent variable is shown as a heat map in Figure  
20 4. Although attitudes toward vaccination increase the explained variance of our model ( $\Delta R^2$   
21 4%-9%) and reveal strong significant effects such that more positive attitudes are associated  
22 with increased vaccination intentions (ORs 1.69-2.32; full results in Table S8), the  
23 relationships in the original model appear robust and are only minimally attenuated when  
24 accounting for generalized attitudes.

1  
2  
3 1 [FIGURE 4 HERE]  
4  
5  
6 2  
7

8 3 **DISCUSSION**  
9

10 4 Understanding the psychological determinants of vaccine acceptance and hesitancy is  
11  
12 crucial during a global pandemic. Across all countries surveyed, between March and  
13 5  
14 September 2020, a substantial proportion of participants (up to 37% in some countries) said  
15 6  
16 that they would *not* accept a hypothetical COVID-19 vaccine. People were slightly more  
17 7  
18 likely to say that they would recommend it to vulnerable friends and family members.  
19 8  
20 Considering who is more or less likely to report willingness to be vaccinated against COVID-  
21 9  
22 19, being male, expressing general trust in those with scientific or medical expertise, and  
23 10  
24 worrying about the virus are the most consistent correlates of vaccine acceptance across our  
25 11  
26 samples. It is important to note that hesitancy about a COVID-19 vaccine is not purely  
27 12  
28 attributable to people's attitudes to vaccines in general. Although (in the UK, where we  
29 13  
30 studied it) negative attitudes towards vaccines in general are a significant and important  
31 14  
32 correlate of COVID-19 vaccine refusal, there are clearly additional factors at play in  
33 15  
34 determining public reactions to a COVID-19 vaccine. This broadly aligns with other research  
35 16  
36 indicating that, for many people, there are concerns specifically around the rapid and novel  
37 17  
38 development processes of COVID-19 vaccines and possible safety issues[36,57]. Our  
39 18  
40 multivariate analyses show that the bulk of the burden of trust rests on science and medicine.  
41 19  
42 This is in line with other recent studies specifically examining the association between trust  
43 20  
44 in scientists and doctors, and COVID-19 vaccine hesitancy [26,27]. Accounting for the other  
45 21  
46 factors in our model, we find that trust in government (both generally and regarding COVID-  
47 22  
48 19) and general social trust (i.e. trust in people) are *not* significantly associated with vaccine  
49 23  
50 acceptance in most of our samples. Since the period of data collection, more information  
51 24  
52 about COVID-19 vaccines, including their safety and efficacy has become available. It  
53 25  
54  
55  
56  
57  
58  
59  
60

1  
2  
3 1 remains to be seen how this information has shifted vaccine intentions. As the public focus  
4  
5 2 has shifted from vaccine development to the regulatory approval and rollout of vaccines[11] ,  
6  
7 3 it is possible that trust in government and regulators may play a greater role in individuals'  
8  
9 4 vaccine decision making. However, further research is required to confirm this speculation.  
10  
11  
12

13 5 The fact that we saw only a weak link between stated vaccine acceptance and our  
14  
15 6 measure of prosociality—along with the fact that higher numbers of people said that they  
16  
17 7 would recommend the vaccine to a vulnerable friend or relative than say they would accept it  
18  
19 8 themselves—suggests that the prosocial nature of vaccines may not be recognized by many  
20  
21 9 people. Recent experimental research has shown that emphasizing the societal benefits of  
22  
23 10 herd immunity (i.e., the need for those who do not see themselves as personally vulnerable to  
24  
25 11 take the vaccine in order to provide protection for those who are) may assist uptake[58].  
26  
27 12 However, such strategies depend on vaccines preventing *transmission* of the virus, rather than  
28  
29 13 just symptoms. There is now preliminary evidence that this is the case for the Moderna and  
30  
31 14 Pfizer BioNTech vaccines [12], but further studies are required to confirm these findings.  
32  
33  
34  
35

36 15 The greater reluctance from women to say that they would take a vaccine is in line  
37  
38 16 with other work focusing on acceptance of a potential COVID-19 vaccine[18,19], and  
39  
40 17 vaccination generally[29] but has not been adequately explained. Even when general vaccine  
41  
42 18 beliefs are taken into account, however, the gender bias remains. Qualitative work should  
43  
44 19 focus on investigating this further, in order to understand the root of women's concerns about  
45  
46 20 the COVID-19 vaccine. We see very little effect of our measures of personal or governmental  
47  
48 21 efficacy, but this may be related to the fact that a vaccine against COVID-19 was  
49  
50 22 hypothetical at the time of the surveys and our measures did not directly ask about  
51  
52 23 vaccination.  
53  
54  
55  
56  
57  
58  
59  
60

1  
2  
3 1 Another important finding highlighted by our repeated samples is that vaccine  
4  
5 2 acceptance appears to be politicized in the US and is becoming so in the UK. Our US results  
6  
7 3 agree with previous US research focusing on COVID-19 vaccine acceptance[39,59], which  
8  
9 4 noted that political conservatives are less accepting of potential COVID-19 vaccines. Our UK  
10  
11 5 results align with those of Maher et al, who, through network analysis, show a pattern of  
12  
13 6 attitudinal alignment over time in a small UK sample, resulting in the emergence of a  
14  
15 7 politically conservative faction expressing less trust in scientists, doctors, and vaccines[21].  
16  
17 8 Although international research has suggested that political conservatism is correlated with  
18  
19 9 anti-vaccination attitudes globally[40], we did not find that ideology was associated with  
20  
21 10 vaccine acceptance outside of the US and UK. However most other countries were only  
22  
23 11 surveyed in earlier stages of the pandemic (i.e. prior to May, 2020) and we can therefore not  
24  
25 12 say whether they might have followed a similar pattern to the UK as time went on.  
26  
27  
28  
29  
30

31 13 It is possible that misinformation susceptibility[60,61] and conspiracy thinking[62]  
32  
33 14 underlie the association between ideology and vaccine attitudes to some extent. For example,  
34  
35 15 Motta et al[63] find that far right-wing media outlets have disproportionately spread  
36  
37 16 misinformation during the early stages of the pandemic. Susceptibility to misinformation  
38  
39 17 around COVID-19 was also found in prior research to be associated with measures of vaccine  
40  
41 18 hesitancy[61]. There is already a proliferation of conspiracy theories focused on specific  
42  
43 19 COVID-19 vaccines[64,65]. It will be important to tackle these pro-actively through  
44  
45 20 ‘prebunking’ methods to inoculate against misinformation[66,67].  
46  
47  
48  
49

50 21 We must note that our surveys did not examine several sociodemographic factors that  
51  
52 22 could explain additional variance in vaccination intentions; ethnic minority status, socio-  
53  
54 23 economic status and underlying health conditions have all been shown to be associated with  
55  
56 24 COVID-19 vaccine hesitancy in some contexts [68,69]. Future research should examine how  
57  
58 25 these factors relate to vaccine confidence and intentions as vaccine campaigns progress.  
59  
60

1  
2  
3 1 Finally, we acknowledge that the heterogeneity in our results across time and  
4  
5 2 countries highlights the role that (unmeasured) contextual, country-specific factors play in  
6  
7 3 informing individuals' vaccination attitudes. As noted by the WHO SAGE working group on  
8  
9 4 vaccine hesitancy, individual factors such as trust and risk perception intersect with  
10  
11 5 contextual influences such as culture, media environments, and information from local  
12  
13 6 leaders[14]. Our samples were not truly representative of the general population in each  
14  
15 7 country: although they were quota-balanced on gender and age, the population that respond to  
16  
17 8 an online questionnaire will differ from the general population on several significant  
18  
19 9 characteristics. However, the rank ordering of countries on vaccine acceptance in our study is  
20  
21 10 similar to that of Lazarus et al[18], which were based on a random stratified sampling  
22  
23 11 approach using several online panel providers. This gives us some confidence in the  
24  
25 12 generalizability of our results, and the fact that our samples were generally larger and  
26  
27 13 included more trust-focused questions makes them useful for exploring these important  
28  
29 14 correlates of vaccine attitudes.

30  
31  
32  
33  
34  
35  
36 15 In terms of practical considerations, our finding that trust in scientific and medical  
37  
38 16 institutions is one of the strongest correlates of vaccine acceptance highlights the need to  
39  
40 17 work proactively with others from outside of this sphere, such as community and religious  
41  
42 18 leaders[70], to open a two-way conversation with those who distrust the scientific and  
43  
44 19 medical establishment. Due consideration must also be given to the accessibility[71],  
45  
46 20 format[72,73], and transparency[74,75] of information provided to the public. Future research  
47  
48 21 should continue to evaluate how to most effectively communicate evidence about  
49  
50 22 vaccination[76], and should seek to more deeply understand the concerns and needs of those  
51  
52 23 who express hesitancy regarding COVID-19 vaccination. As Bhopal[77], commenting on  
53  
54 24 potential COVID-19 mass vaccination efforts, writes, "Open, honest, factual and sensitively  
55  
56 25 conducted public dialogue is now urgent."

1  
2  
3 1  
4  
5  
6 2  
7  
8  
9 3  
10  
11 4  
12  
13 5  
14  
15 6  
16  
17 7  
18  
19 8  
20  
21 9  
22  
23 10  
24  
25 11  
26  
27 12  
28  
29 13  
30  
31 14  
32  
33 15  
34  
35 16  
36  
37 17  
38  
39  
40  
41  
42  
43  
44  
45  
46  
47  
48  
49  
50  
51  
52  
53  
54  
55  
56  
57  
58  
59  
60

## 2 CONCLUSIONS

3 Countries around the world face a major evidence communication challenge when it  
4 comes to the COVID-19 vaccines that are becoming available. In order to reach a large  
5 enough proportion of the population in each country to achieve herd immunity, it is vital to  
6 increase the number of people who are willing to take a vaccine. To achieve this, non-  
7 pharmaceutical interventions will need to be deployed[78], such as communicating  
8 trustworthy information about the vaccines via credible sources. In the current research, we  
9 have demonstrated across 12 national samples that people's level of worry about COVID-19  
10 and their trust in experts and medical and scientific institutions are key determinants of  
11 potential vaccine acceptance. Future research should confirm these findings in experimental  
12 settings. We recommend that empirical studies should continue to be carried out alongside  
13 qualitative work with different communities to get a rounded understanding of people's  
14 concerns and misunderstandings. Only by knowing these can we adequately address them  
15 and provide people with the information they need to make a decision that will affect not just  
16 their own health, but that of their community as well.

## 1 **FIGURE LEGENDS**

2 **Figure 1. COVID-19 vaccine acceptance across countries and time.** Percentage of  
3 respondents who stated they were willing to receive or recommend a COVID-19 vaccine  
4 across surveys. UK and US samples using different panel providers are reported separately.

5 **Figure 2. Correlates of vaccine acceptance.** Heatmap of odds ratios in multivariate logistic  
6 regression model predicting stated vaccine acceptance. Columns represent individual samples  
7 and rows represent independent variables in model. Grey values are non-significant,  $p > .05$ .  
8 Red shading indicates a lower likelihood of reported vaccine acceptance and blue shading a  
9 higher likelihood. For space, samples are defined by their two character ISO country code  
10 and a letter denoting participant source (B, BVA; D, Dynata; P, Prolific; R, Respondi).  
11 Political orientation data was not collected in the French sample; this sample is excluded  
12 from pooled data.

13 **Figure 3. Political ideology and vaccine acceptance in the UK.** Predicted likelihood that an  
14 individual will accept being vaccinated at varying levels of political ideology (1 = very  
15 liberal/left wing, 7 = very conservative/right wing) in UK samples over time.

16 **Figure 4. Negative general attitudes towards vaccination do not fully account for**  
17 **relationships in the model.** Results of multivariate logistic regression models investigating  
18 reported COVID-19 vaccine acceptance in UK samples, excluding (left panel) or including  
19 (right panel) general vaccine attitudes as an independent variable. Odds ratios shown are  
20 based on scaled variables (other than gender). Grey values are non-significant,  $p > .05$ . For  
21 space, samples are defined by a letter denoting participant source (P, Prolific; R, Respondi).



## 1 **Author contributions**

2 Survey instrument development: JRK, CRS, GR, SD, SvdL, ALJF. Study conceptualisation,  
3 design and theoretical framing: JRK, SvdL, ALJF. Data collection: JRK, CRS, GR, SD, US,  
4 CD, PA, ALJF. Statistical analyses and first draft: JRK, SvdL, ALJF. Manuscript editing,  
5 review and approval: JRK, CRS, GR, SD, US, CD, PA, ALJF, SvdL.

## 6 **Data availability**

7 The data and analysis code for this study are available at:

8 [https://osf.io/vgez2/?view\\_only=8fe81f5fe3f345a99b06edeaba6bd9e1](https://osf.io/vgez2/?view_only=8fe81f5fe3f345a99b06edeaba6bd9e1)

## 9 **Ethics approval**

10 This study was approved by the University of Cambridge Psychology Research Ethics  
11 Committee (PRE.2020.034).

## 12 **Funding**

13 This study was funded by the Winton Centre for Risk and Evidence Communication which is  
14 supported by the David and Claudia Harding Foundation. Award/Grant number is not  
15 applicable.

## 16 **Competing interests**

17 None declared.

## 18 **Acknowledgements**

19 We would like to thank María del Carmen Climent Palmer, Ban Mutsuhisa, Jin Park, and  
20 Giulia Luoni for additional translations, the University of Tokyo for their collaboration, and  
21 all the participants and those who helped to administer the study.

## 22 **Patient and Public Involvement**

23 Patients or the public were not involved in the design, or conduct, or reporting, or  
24 dissemination plans of our research.

1  
2  
3 1 **REFERENCES**  
4  
5 2  
6  
7 3 1 Porterfield C. Global Coronavirus Death Toll Tops 2.5 Million — Though New Fatalities  
8 4 Have Dropped. *Forbes*.  
9 5 2021. [https://www.forbes.com/sites/carlieporterfield/2021/02/25/global-coronavirus-death-toll-](https://www.forbes.com/sites/carlieporterfield/2021/02/25/global-coronavirus-death-toll-tops-25-million---though-new-fatalities-have-dropped/)  
10 6 [tops-25-million---though-new-fatalities-have-dropped/](https://www.forbes.com/sites/carlieporterfield/2021/02/25/global-coronavirus-death-toll-tops-25-million---though-new-fatalities-have-dropped/) (accessed 3 Mar 2021).  
11  
12 7 2 International Monetary Fund. *World Economic Outlook, October 2020: A Long and Difficult*  
13 8 *Ascent*. Washington, DC: 2020.  
14 9 [https://www.imf.org/en/Publications/WEO/Issues/2020/09/30/world-economic-outlook-](https://www.imf.org/en/Publications/WEO/Issues/2020/09/30/world-economic-outlook-october-2020)  
15 10 [october-2020](https://www.imf.org/en/Publications/WEO/Issues/2020/09/30/world-economic-outlook-october-2020) (accessed 29 Nov 2020).  
16  
17 11 3 Lytras T, Tsiodras S. Lockdowns and the COVID-19 pandemic: What is the endgame? *Scand.*  
18 12 *J. Public Health*. 2020. doi:10.1177/1403494820961293  
19  
20 13 4 Schoch-Spana M, Brunson EK, Long R, *et al*. The public's role in COVID-19 vaccination:  
21 14 human-centered recommendations to enhance pandemic vaccine awareness, access, and  
22 15 acceptance in the United States. *Vaccine* Published Online First: 29 October 2020.  
23 16 doi:10.1016/j.vaccine.2020.10.059  
24  
25 17 5 Callaway E. What Pfizer's landmark COVID vaccine results mean for the pandemic. *Nature*  
26 18 Published Online First: 9 November 2020. doi:10.1038/d41586-020-03166-8  
27  
28 19 6 Callaway E. COVID vaccine excitement builds as Moderna reports third positive result.  
29 20 *Nature* 2020;**587**:337–8. doi:10.1038/d41586-020-03248-7  
30  
31 21 7 BBC News. Covid vaccines: How fast is progress around the world? BBC News.  
32 22 <https://www.bbc.co.uk/news/world-56237778> (accessed 13 Apr 2021).  
33  
34 23 8 Gomes MGM, Corder R, King J, *et al*. Individual variation in susceptibility or exposure to  
35 24 SARS-CoV-2 lowers the herd immunity threshold. *medRxiv* Published Online First: 21 May  
36 25 2020. doi:10.1101/2020.04.27.20081893  
37  
38 26 9 Sanche S, Lin YT, Xu C, *et al*. High Contagiousness and Rapid Spread of Severe Acute  
39 27 Respiratory Syndrome Coronavirus 2. *Emerg Infect Dis* 2020;**26**:1470–7.  
40 28 doi:10.3201/eid2607.200282  
41  
42 29 10 Fontanet A, Cauchemez S. COVID-19 herd immunity: where are we? *Nat Rev Immunol*  
43 30 2020;**20**:583–4. doi:10.1038/s41577-020-00451-5  
44  
45 31 11 Kim JH, Marks F, Clemens JD. Looking beyond COVID-19 vaccine phase 3 trials. *Nat. Med.*  
46 32 2021;**27**:205–11. doi:10.1038/s41591-021-01230-y  
47  
48 33 12 Thompson MG, Burgess JL, Naleway AL, *et al*. Interim Estimates of Vaccine Effectiveness of  
49 34 BNT162b2 and mRNA-1273 COVID-19 Vaccines in Preventing SARS-CoV-2 Infection  
50 35 Among Health Care Personnel, First Responders, and Other Essential and Frontline Workers  
51 36 — Eight U.S. Locations, December 2020–March 2021. *CDC Morb Mortal Wkly Rep* 2021;**70**.  
52 37 doi:10.15585/mmwr.mm7013e3  
53  
54 38 13 Aschwanden C. Five reasons why COVID herd immunity is probably impossible. *Nature*  
55 39 2021;**591**:520–2. doi:10.1038/d41586-021-00728-2  
56  
57 40 14 WHO. Report of the Sage Working Group on Vaccine Hesitancy. 2014.  
58 41 [https://www.who.int/immunization/sage/meetings/2014/october/1\\_Report\\_WORKING\\_GRO](https://www.who.int/immunization/sage/meetings/2014/october/1_Report_WORKING_GROUP_vaccine_hesitancy_final.pdf)  
59 42 [UP\\_vaccine\\_hesitancy\\_final.pdf](https://www.who.int/immunization/sage/meetings/2014/october/1_Report_WORKING_GROUP_vaccine_hesitancy_final.pdf) (accessed 23 Nov 2020).  
60  
61 43 15 WHO. Ten threats to global health in 2019. 2019. [https://www.who.int/news-](https://www.who.int/news-room/spotlight/ten-threats-to-global-health-in-2019)  
62 44 [room/spotlight/ten-threats-to-global-health-in-2019](https://www.who.int/news-room/spotlight/ten-threats-to-global-health-in-2019) (accessed 20 Nov 2020).

1  
2  
3  
4  
5  
6  
7  
8  
9  
10  
11  
12  
13  
14  
15  
16  
17  
18  
19  
20  
21  
22  
23  
24  
25  
26  
27  
28  
29  
30  
31  
32  
33  
34  
35  
36  
37  
38  
39  
40  
41  
42  
43  
44  
45  
46  
47  
48  
49  
50  
51  
52  
53  
54  
55  
56  
57  
58  
59  
60

- 1 16 Verger P, Dubé E. Restoring confidence in vaccines in the COVID-19 era. *Expert Rev. Vaccines*. 2020. doi:10.1080/14760584.2020.1825945
- 2 2
- 3 17 Mesch GS, Schwirian KP. Social and political determinants of vaccine hesitancy: Lessons learned from the H1N1 pandemic of 2009-2010. *Am J Infect Control* 2015;**43**:1161–5. doi:10.1016/j.ajic.2015.06.031
- 4 4
- 5 5
- 6 18 Lazarus J V., Ratzan SC, Palayew A, *et al.* A global survey of potential acceptance of a COVID-19 vaccine. *Nat Med* Published Online First: 20 October 2020. doi:10.1038/s41591-020-1124-9
- 7 7
- 8 8
- 9 19 Wang J, Jing R, Lai X, *et al.* Acceptance of COVID-19 Vaccination during the COVID-19 Pandemic in China. *Vaccines* 2020;**8**:482. doi:10.3390/vaccines8030482
- 10 10
- 11 20 Frank K, Arim R. Canadians’ willingness to get a COVID-19 vaccine when one becomes available: What role does trust play? Stat. Canada. 2020. <https://www150.statcan.gc.ca/n1/pub/45-28-0001/2020001/article/00043-eng.htm> (accessed 22 Nov 2020).
- 12 12
- 13 13
- 14 14
- 15 21 Maher PJ, MacCarron P, Quayle M. Mapping public health responses with attitude networks: the emergence of opinion-based groups in the UK’s early COVID-19 response phase. *Br J Soc Psychol* 2020;**59**:641–52. doi:10.1111/bjso.12396
- 16 16
- 17 17
- 18 22 Padhi BK, A. Almohaithef M. Determinants of COVID-19 vaccine acceptance in Saudi Arabia: a web-based national survey. *medRxiv* 2020;:2020.05.27.20114413. doi:10.1101/2020.05.27.20114413
- 19 19
- 20 20
- 21 23 Soveri A, Karlsson LC, Antfolk J, *et al.* Unwillingness to engage in behaviors that protect against COVID-19: Conspiracy, trust, reactance, and endorsement of complementary and alternative medicine. doi:10.31234/OSF.IO/MHCTF
- 22 22
- 23 23
- 24 24 Palamenghi L, Barello S, Boccia S, *et al.* Mistrust in biomedical research and vaccine hesitancy: the forefront challenge in the battle against COVID-19 in Italy. *Eur J Epidemiol* 2020;**35**:785–8. doi:10.1007/s10654-020-00675-8
- 25 25
- 26 26
- 27 25 Petravić L, Arh R, Gabrovec T, *et al.* Factors Affecting Attitudes towards COVID-19 Vaccination: An Online Survey in Slovenia. *Vaccines* 2021;**9**:247. doi:10.3390/vaccines9030247
- 28 28
- 29 29
- 30 26 Thaker J. The Persistence of Vaccine Hesitancy: COVID-19 Vaccination Intention in New Zealand. *J Health Commun* 2021;:1–8. doi:10.1080/10810730.2021.1899346
- 31 31
- 32 27 Jennings W, Stoker G, Willis H, *et al.* Lack of trust and social media echo chambers predict COVID-19 vaccine hesitancy. *medRxiv* 2021;:2021.01.26.21250246. doi:10.1101/2021.01.26.21250246
- 33 33
- 34 34
- 35 28 Larson HJ, Cooper LZ, Eskola J, *et al.* Addressing the vaccine confidence gap. *Lancet*. 2011;**378**:526–35. doi:10.1016/S0140-6736(11)60678-8
- 36 36
- 37 29 de Figueiredo A, Simas C, Karafillakis E, *et al.* Mapping global trends in vaccine confidence and investigating barriers to vaccine uptake: a large-scale retrospective temporal modelling study. *Lancet* 2020;**396**:898–908. doi:10.1016/S0140-6736(20)31558-0
- 38 38
- 39 39
- 40 30 National Academies of Sciences, Medicine, and Engineering. Trust and Confidence at the Interfaces of the Life Sciences and Society. A Workshop Summary. Washington, DC: 2015. <https://www.nap.edu/read/21798>
- 41 41
- 42 42
- 43 31 Hartman RO, Dieckmann NF, Sprenger AM, *et al.* Modeling attitudes toward science: Development and validation of the credibility of science scale. *Basic Appl Soc Psych* 2017;**39**:358–71. doi:10.1080/01973533.2017.1372284
- 44 44
- 45 45

- 1  
2  
3 1 32 Brewer PR, Ley BL. Whose science do you believe? Explaining trust in sources of scientific  
4 2 information about the environment. *Sci Commun* 2013;**35**:115–37.  
5 3 doi:10.1177/1075547012441691  
6  
7 4 33 Becker MH. The Health Belief Model and Sick Role Behavior. *Health Educ Monogr*  
8 5 1974;**2**:409–19. doi:10.1177/109019817400200407  
9  
10 6 34 Rogers RW. A Protection Motivation Theory of Fear Appeals and Attitude Change. *J Psychol*  
11 7 1975;**91**:93–114. doi:10.1080/00223980.1975.9915803  
12  
13 8 35 Ling M, Kothe EJ, Mullan BA. Predicting intention to receive a seasonal influenza vaccination  
14 9 using Protection Motivation Theory. *Soc Sci Med* 2019;**233**:87–92.  
15 10 doi:10.1016/j.socscimed.2019.06.002  
16  
17 11 36 Dror AA, Eisenbach N, Taiber S, *et al.* Vaccine hesitancy: the next challenge in the fight  
18 12 against COVID-19. *Eur J Epidemiol* 2020;**35**:775–9. doi:10.1007/s10654-020-00671-y  
19  
20 13 37 Kelly B, Bann C, Squiers L, *et al.* Predicting willingness to vaccinate for COVID-19 in the  
21 14 US. *JCH Impact*. 2020. [https://jhcimpact.com/posts/f/predicting-willingness-to-vaccinate-for-](https://jhcimpact.com/posts/f/predicting-willingness-to-vaccinate-for-covid-19-in-the-us)  
22 15 [covid-19-in-the-us](https://jhcimpact.com/posts/f/predicting-willingness-to-vaccinate-for-covid-19-in-the-us) (accessed 22 Nov 2020).  
23  
24 16 38 Wong LP, Alias H, Wong P-F, *et al.* The use of the health belief model to assess predictors of  
25 17 intent to receive the COVID-19 vaccine and willingness to pay. *Hum Vaccin Immunother*  
26 18 2020;**16**:2204–14. doi:10.1080/21645515.2020.1790279  
27  
28 19 39 Kreps S, Prasad S, Brownstein JS, *et al.* Factors Associated With US Adults' Likelihood of  
29 20 Accepting COVID-19 Vaccination. *JAMA Netw open* 2020;**3**:e2025594.  
30 21 doi:10.1001/jamanetworkopen.2020.25594  
31  
32 22 40 Hornsey MJ, Harris EA, Fielding KS. The Psychological Roots of Anti-Vaccination Attitudes:  
33 23 A 24-Nation Investigation. *Heal Psychol* 2018;**37**:307–15. doi:10.1037/hea0000586.supp  
34  
35 24 41 Hornsey MJ, Finlayson M, Chatwood G, *et al.* Donald Trump and vaccination: The effect of  
36 25 political identity, conspiracist ideation and presidential tweets on vaccine hesitancy. *J Exp Soc*  
37 26 *Psychol* 2020;**88**:103947. doi:10.1016/j.jesp.2019.103947  
38  
39 27 42 Lewandowsky S, Gignac GE, Oberauer K. The role of conspiracist ideation and worldviews in  
40 28 predicting rejection of science. *PLoS One* 2013;**8**:e75637. doi:10.1371/journal.pone.0075637  
41  
42 29 43 Reyna VF, Nelson WL, Han PK, *et al.* How Numeracy Influences Risk Comprehension and  
43 30 Medical Decision Making. *Psychol Bull* 2009;**135**:943–73. doi:10.1037/a0017327  
44  
45 31 44 Betsch C, Schmid P, Heinemeier D, *et al.* Beyond confidence: Development of a measure  
46 32 assessing the 5C psychological antecedents of vaccination. *PLoS One* 2018;**13**:e0208601.  
47 33 doi:10.1371/journal.pone.0208601  
48  
49 34 45 Jang WM, Kim UN, Jang DH, *et al.* Influence of trust on two different risk perceptions as an  
50 35 affective and cognitive dimension during Middle East respiratory syndrome coronavirus  
51 36 (MERS-CoV) outbreak in South Korea: Serial cross-sectional surveys. *BMJ Open*  
52 37 2020;**10**:33026. doi:10.1136/bmjopen-2019-033026  
53  
54 38 46 Prolific. Representative Samples on Prolific. [https://researcher-help.prolific.co/hc/en-](https://researcher-help.prolific.co/hc/en-gb/articles/360019236753-Representative-Samples-on-Prolific)  
55 39 [gb/articles/360019236753-Representative-Samples-on-Prolific](https://researcher-help.prolific.co/hc/en-gb/articles/360019236753-Representative-Samples-on-Prolific) (accessed 19 Oct 2020).  
56  
57 40 47 Hale T, Angrist N, Goldszmidt R, *et al.* A global panel database of pandemic policies (Oxford  
58 41 COVID-19 Government Response Tracker). *Nat Hum Behav* 2021;:1–10. doi:10.1038/s41562-  
59 42 021-01079-8  
60  
61 43 48 Ali H, Hossain MF, Hasan MM, *et al.* Covid-19 Dataset: Worldwide spread log including  
62 44 countries first case and first death. *Data Br* 2020;**32**:106173. doi:10.1016/j.dib.2020.106173

- 1  
2  
3 1 49 Moderna. Moderna Ships mRNA Vaccine Against Novel Coronavirus (mRNA-1273) for  
4 2 Phase 1 Study. 2020.<https://investors.modernatx.com/news-releases/news-release->  
5 3 [details/moderna-ships-mrna-vaccine-against-novel-coronavirus-mrna-1273](https://investors.modernatx.com/news-releases/news-release-) (accessed 1 Apr  
6 4 2021).
- 8 5 50 University of Oxford. Oxford team to begin novel coronavirus vaccine research.  
9 6 2020.<https://www.ox.ac.uk/news/2020-02-07-oxford-team-begin-novel-coronavirus-vaccine->  
10 7 [research](https://www.ox.ac.uk/news/2020-02-07-oxford-team-begin-novel-coronavirus-vaccine-) (accessed 1 Apr 2021).
- 12 8 51 Adams ben. Pfizer, BioNTech start their COVID-19 vax phase 3, squaring off with Moderna .  
13 9 Fierce Biotech. 2020.<https://www.fiercebiotech.com/biotech/pfizer-biontech-start-their-covid->  
14 10 [vax-phase-3-squaring-off-moderna](https://www.fiercebiotech.com/biotech/pfizer-biontech-start-their-covid-) (accessed 1 Apr 2021).
- 16 11 52 National Institutes of Health. Phase 3 Clinical Testing in the US of AstraZeneca COVID-19  
17 12 Vaccine Candidate Begins. 2020.<https://www.nih.gov/news-events/news-releases/phase-3->  
18 13 [clinical-testing-us-astrazeneca-covid-19-vaccine-candidate-begins](https://www.nih.gov/news-events/news-releases/phase-3-) (accessed 1 Apr 2021).
- 20 14 53 Cokely ET, Galesic M, Schulz E, *et al.* Measuring risk literacy: The Berlin Numeracy Test.  
21 15 *Judgm Decis Mak* 2012;**7**:25–47.
- 22 16 54 Lipkus IM, Samsa G, Rimer BK. General performance on a numeracy scale among highly  
23 17 educated samples. *Med Decis Mak* 2001;**21**:37–44. doi:10.1177/0272989X0102100105
- 25 18 55 Lundmark S, Gilljam M, Dahlberg S. Measuring Generalized Trust. *Public Opin. Q.*  
26 19 2016;**80**:26–43. doi:10.1093/poq/nfv042
- 28 20 56 Bryan ML, Jenkins SP. Multilevel Modelling of Country Effects: A Cautionary Tale. *Eur*  
29 21 *Sociol Rev* 2016;**32**:3–22. doi:10.1093/esr/jcv059
- 31 22 57 Campbell D. Protecting others and record of vaccines main reasons to get Covid jab, poll  
32 23 shows. *Guardian*. 2020.<https://www.theguardian.com/society/2020/nov/30/covid-protecting->  
33 24 [others-and-record-of-vaccines-main-reasons-to-get-jab](https://www.theguardian.com/society/2020/nov/30/covid-protecting-)
- 34 25 58 Betsch C, Böhm R, Korn L, *et al.* On the benefits of explaining herd immunity in vaccine  
35 26 advocacy. *Nat Hum Behav* 2017;**1**:0056. doi:10.1038/s41562-017-0056
- 37 27 59 Carpiano RM. Demographic differences in US adult intentions to receive a potential  
38 28 coronavirus vaccine and implications for ongoing study. doi:10.1101/2020.09.07.20190058
- 40 29 60 Calvillo DP, Ross BJ, Garcia RJB, *et al.* Political Ideology Predicts Perceptions of the Threat  
41 30 of COVID-19 (and Susceptibility to Fake News About It). *Soc Psychol Personal Sci*  
42 31 2020;**11**:1119–28. doi:10.1177/1948550620940539
- 44 32 61 Roozenbeek J, Schneider CR, Dryhurst S, *et al.* Susceptibility to misinformation about  
45 33 COVID-19 around the world. *R Soc Open Sci* 2020;**7**:201199. doi:10.1098/rsos.201199
- 46 34 62 Linden S, Panagopoulos C, Azevedo F, *et al.* The Paranoid Style in American Politics  
47 35 Revisited: An Ideological Asymmetry in Conspiratorial Thinking. *Polit Psychol*  
48 36 2020;**;**pops.12681. doi:10.1111/pops.12681
- 50 37 63 Motta M, Stecula D, Farhart C. How right-leaning media coverage of Covid-19 facilitated the  
51 38 spread of misinformation in the early stages of the pandemic in the U.S. *Can J Polit Sci*  
52 39 2020;**53**:335–42. doi:10.1017/S0008423920000396
- 54 40 64 Reuters. Fact check: Dr. Fauci was not the first CEO and other false claims about biotech  
55 41 company Moderna. Reuters. 2020.<https://uk.reuters.com/article/uk-factcheck-moderna-fauci->  
56 42 [gates/fact-check-dr-fauci-was-not-the-first-ceo-and-other-false-claims-about-biotech-](https://uk.reuters.com/article/uk-factcheck-moderna-fauci-)  
57 43 [company-moderna-idUSKBN25S5GD](https://uk.reuters.com/article/uk-factcheck-moderna-fauci-) (accessed 23 Nov 2020).
- 59 44 65 May L. Antivaxxers share conspiracy theories after Pfizer announcement. *Dly. Mail*.  
60 45 2020.<https://www.dailymail.co.uk/news/article-8934447/Antivaxxers-share-conspiracy->



- 1 theories-Pfizer-announcement.html (accessed 23 Nov 2020).
- 2
- 3 1
- 4
- 5 2 66 Roozenbeek J, van der Linden S, Nygren T. Prebunking interventions based on ‘inoculation’
- 6 3 theory can reduce susceptibility to misinformation across cultures. *Harvard Kennedy Sch*
- 7 4 *Misinformation Rev* 2020;**1**. doi:10.37016//mr-2020-008
- 8
- 9 5 67 Jolley D, Douglas KM. Prevention is better than cure: Addressing anti-vaccine conspiracy
- 10 6 theories. *J Appl Soc Psychol* 2017;**47**:459–69. doi:10.1111/jasp.12453
- 11
- 12 7 68 Kim D. Associations of Race/Ethnicity and Other Demographic and Socioeconomic Factors
- 13 8 with Vaccination During the COVID-19 Pandemic in the United States. *medRxiv*
- 14 9 2021;:2021.02.16.21251769. doi:10.1101/2021.02.16.21251769
- 15
- 16 10 69 Williams L, Flowers P, McLeod J, *et al*. Social patterning and stability of intention to accept a
- 17 11 COVID-19 vaccine in scotland: Will those most at risk accept a vaccine? *Vaccines* Published
- 18 12 Online First: 2021. doi:10.3390/vaccines9010017
- 19
- 20 13 70 Jarrett C, Wilson R, O’Leary M, *et al*. Strategies for addressing vaccine hesitancy – A
- 21 14 systematic review. *Vaccine* 2015;**33**:4180–90. doi:10.1016/j.vaccine.2015.04.040
- 22
- 23 15 71 O’Neill O. Accountability, trust and informed consent in medical practice and research. *Clin*
- 24 16 *Med J R Coll Physicians London* 2004;**4**:269–76. doi:10.7861/clinmedicine.4-3-269
- 25
- 26 17 72 Schwartz LM, Woloshin S, Welch HG. Using a Drug Facts Box to Communicate Drug
- 27 18 Benefits and Harms. *Ann Intern Med* 2009;**150**:516–27.
- 28
- 29 19 73 Brick C, McDowell M, Freeman ALJ. Risk communication in tables versus text: A registered
- 30 20 report randomized trial on ‘fact boxes’. *R Soc Open Sci* 2020;**7**. doi:10.1098/rsos.190876
- 31
- 32 21 74 Blastland M, Freeman ALJ, van der Linden S, *et al*. Five rules for evidence communication.
- 33 22 *Nature* 2020;**587**:362–4. doi:10.1038/d41586-020-03189-1
- 34
- 35 23 75 van der Bles AM, van der Linden S, Freeman ALJ, *et al*. The effects of communicating
- 36 24 uncertainty on public trust in facts and numbers. 2020.
- 37
- 38 25 76 Kerr JR, Freeman ALJ, Marteau TM, *et al*. Effect of Information about COVID-19 Vaccine
- 39 26 Effectiveness and Side Effects on Behavioural Intentions: Two Online Experiments. *Vaccines*
- 40 27 2021;**9**:379. doi:10.3390/vaccines9040379
- 41
- 42 28 77 Bhopal RS. COVID-19 zugzwang: Potential public health moves towards population (herd
- 43 29 immunity. *Public Heal Pract* 2020;**1**:100031. doi:10.1016/j.puhip.2020.100031
- 44
- 45 30 78 Van Bavel JJ, Baicker K, Boggio PS, *et al*. Using social and behavioural science to support
- 46 31 COVID-19 pandemic response. *Nat Hum Behav* 2020;**4**:460–71. doi:10.1038/s41562-020-
- 47 32 0884-z
- 48
- 49
- 50
- 51
- 52
- 53
- 54
- 55
- 56
- 57
- 58
- 59
- 60



Figure 1. COVID-19 vaccine acceptance across countries and time. Percentage of respondents who stated they were willing to receive or recommend a COVID-19 vaccine across surveys. UK and US samples using different panel providers are reported separately

199x199mm (300 x 300 DPI)



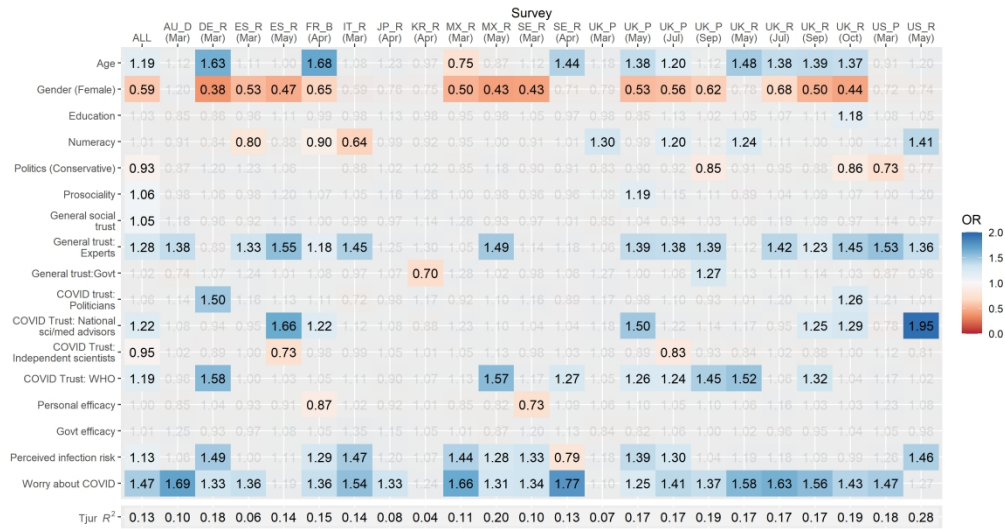

Figure 2. Correlates of vaccine acceptance. Heatmap of odds ratios in multivariate logistic regression model predicting stated vaccine acceptance. Columns represent individual samples and rows represent independent variables in model. Grey values are non-significant,  $p > .05$ . Red shading indicates a lower likelihood of reported vaccine acceptance and blue shading a higher likelihood. For space, samples are defined by their two character ISO country code and a letter denoting participant source (B, BVA; D, Dynata; P, Prolific; R, Respondi). Political orientation data was not collected in the French sample; this sample is excluded from pooled data.

299x159mm (300 x 300 DPI)

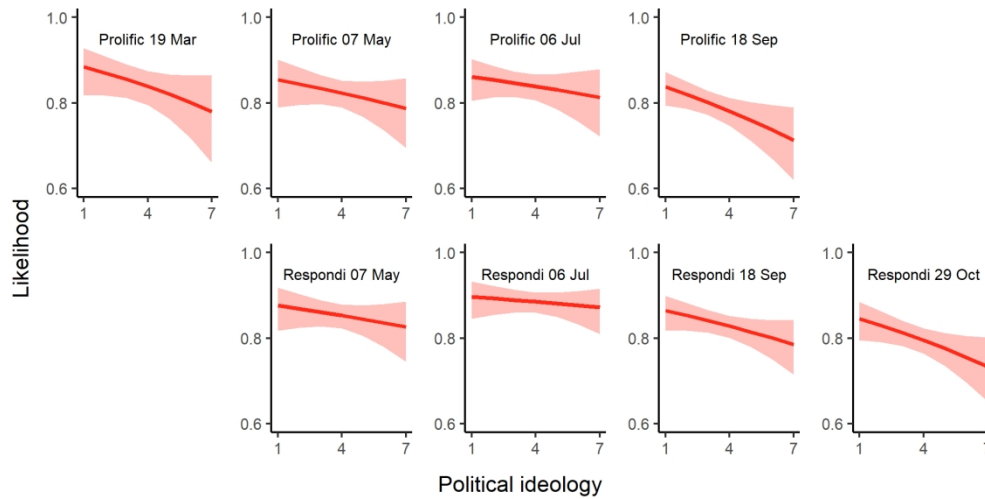

Figure 3. Political ideology and vaccine acceptance in the UK. Predicted likelihood that an individual will accept being vaccinated at varying levels of political ideology (1 = very liberal/left wing, 7 = very conservative/right wing) in UK samples over time.

177x88mm (300 x 300 DPI)

1  
2  
3  
4  
5  
6  
7  
8  
9  
10  
11  
12  
13  
14  
15  
16  
17  
18  
19  
20  
21  
22  
23  
24  
25  
26  
27  
28  
29  
30  
31  
32  
33  
34  
35  
36  
37  
38  
39  
40  
41  
42  
43  
44  
45  
46  
47  
48  
49  
50  
51  
52  
53  
54  
55  
56  
57  
58  
59  
60

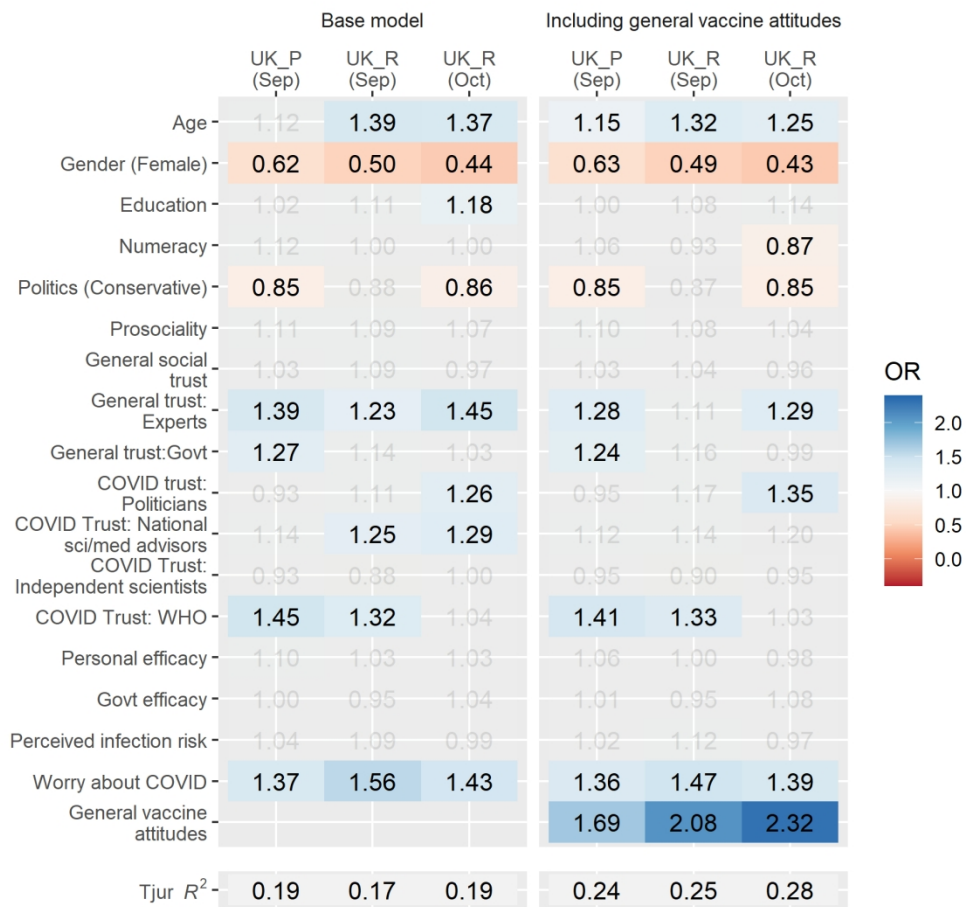

Figure 3. Political ideology and vaccine acceptance in the UK. Predicted likelihood that an individual will accept being vaccinated at varying levels of political ideology (1 = very liberal/left wing, 7 = very conservative/right wing) in UK samples over time.

159x149mm (300 x 300 DPI)

**Correlates of intended COVID-19 vaccine acceptance across time and countries: Results from a series of cross-sectional surveys**

**Supplementary material**

Table S1  
Survey items and wording

| Variable                     | Wording                                                                                                                                       | Response                                                                                                                                                                                                                                                                                                                                                                                                                                      |
|------------------------------|-----------------------------------------------------------------------------------------------------------------------------------------------|-----------------------------------------------------------------------------------------------------------------------------------------------------------------------------------------------------------------------------------------------------------------------------------------------------------------------------------------------------------------------------------------------------------------------------------------------|
| Gender                       | What is your gender?                                                                                                                          | 0 =Male, 1= Female, 'Other' and 'Prefer not to say' (included in Prolific samples only) coded as missing.                                                                                                                                                                                                                                                                                                                                     |
| Age                          | What is your age?                                                                                                                             | Age in years                                                                                                                                                                                                                                                                                                                                                                                                                                  |
| Education                    | Please indicate your highest educational qualification                                                                                        | 1 = No formal education above age 16, 2 = Professional or technical qualifications above age 16, 3 = School education up to age 18, 4 = Degree (Bachelors) or equivalent, 5 = Degree (Masters) or other postgraduate qualification, 6 = Doctorate [In France] 1 = No diploma, 2 =Primary school certificate, 3 = BEPC - Brevet des colleges, 4 = CAP / BEP, 5 = BAC / professional certificate / technical certificate, 6 = BAC +2 and above. |
| Numeracy (summed; range 1-5) | Adaptive Berlin Numeracy test (2-3items, see Cokely et al., 2012 for details).<br>Which represents the highest risk of something happening?   | Scores range 1-4<br>1 = '1 in 10' (correct), 2 = '1 in 1000', 3 = '1 in 100'                                                                                                                                                                                                                                                                                                                                                                  |
| Politics                     | Where do you feel your political views lie on a spectrum of left wing (or liberal) to right wing (or conservative)?                           | 1 = Very liberal/left, 7 = Very conservative/right                                                                                                                                                                                                                                                                                                                                                                                            |
| Prosociality                 | To what extent do you think it's important to do things for the benefit of others and society even if they have some costs to you personally? | 1 = Not at all, 7 = Very much so                                                                                                                                                                                                                                                                                                                                                                                                              |

|                                                                                                                                                                                                                                                                         |                                        |                                                                                                                                                                                                                                                                                                                                      |                                                                                                                                                                            |
|-------------------------------------------------------------------------------------------------------------------------------------------------------------------------------------------------------------------------------------------------------------------------|----------------------------------------|--------------------------------------------------------------------------------------------------------------------------------------------------------------------------------------------------------------------------------------------------------------------------------------------------------------------------------------|----------------------------------------------------------------------------------------------------------------------------------------------------------------------------|
| 1<br>2<br>3<br>4<br>5<br>6<br>7<br>8<br>9<br>10<br>11<br>12<br>13<br>14<br>15<br>16<br>17<br>18<br>19<br>20<br>21<br>22<br>23<br>24<br>25<br>26<br>27<br>28<br>29<br>30<br>31<br>32<br>33<br>34<br>35<br>36<br>37<br>38<br>39<br>40<br>41<br>42<br>43<br>44<br>45<br>46 | General social trust                   | Generally speaking, would you say most people can be trusted, or that you can't be too careful in dealing with people?                                                                                                                                                                                                               | 1 = Can't be too careful, 7 = Most people can be trusted                                                                                                                   |
|                                                                                                                                                                                                                                                                         | General trust: Experts (scale)         | How much do you trust each of the following? -<br>Medical doctors and nurses<br>How much do you trust each of the following? -<br>Scientists<br>How much do you trust each of the following? -<br>Scientific knowledge                                                                                                               | 1 = Cannot be trusted at all, 5 = Can be trusted a lot<br>1 = Cannot be trusted at all, 5 = Can be trusted a lot<br>1 = Cannot be trusted at all, 5 = Can be trusted a lot |
|                                                                                                                                                                                                                                                                         | General trust: Govt (scale)            | How much do you trust each of the following? -<br>Civil servants or public officials in the country you are living in<br>How much do you trust each of the following? -<br>The current government of the country you are living in<br>How much do you trust each of the following? -<br>Politicians in the country you are living in | 1 = Cannot be trusted at all, 5 = Can be trusted a lot<br>1 = Cannot be trusted at all, 5 = Can be trusted a lot<br>1 = Cannot be trusted at all, 5 = Can be trusted a lot |
|                                                                                                                                                                                                                                                                         | COVID trust: Politicians               | How much do you trust the country's politicians to deal effectively with the pandemic?                                                                                                                                                                                                                                               | 1 = Not at all, 7 = Very much                                                                                                                                              |
|                                                                                                                                                                                                                                                                         | COVID Trust: National sci/med advisors | How much do you trust the country's national scientific and medical advisors to know the best measures to take in the face of the pandemic?                                                                                                                                                                                          | 1 = Not at all, 7 = Very much                                                                                                                                              |
|                                                                                                                                                                                                                                                                         | COVID Trust: Independent scientists    | How much do you trust experts who are not connected with the government who are commenting on measures planned for the pandemic?                                                                                                                                                                                                     | 1 = Not at all, 7 = Very much                                                                                                                                              |
|                                                                                                                                                                                                                                                                         | COVID Trust: WHO                       | How much do you trust the World Health Organisation to know the best measures to take in the face of the pandemic?                                                                                                                                                                                                                   | 1 = Not at all, 7 = Very much                                                                                                                                              |
|                                                                                                                                                                                                                                                                         | Personal efficacy                      | To what extent do you feel that the personal actions you are taking to try to limit the spread of coronavirus make a difference?                                                                                                                                                                                                     | 1 = Not at all, 7 = Very much                                                                                                                                              |
|                                                                                                                                                                                                                                                                         | Govt efficacy                          | To what extent do you feel the actions that your country is taking to limit the spread of coronavirus make a difference?                                                                                                                                                                                                             | 1 = Not at all, 7 = Very much                                                                                                                                              |

1  
2  
3  
4  
5  
6  
7  
8  
9  
10  
11  
12  
13  
14  
15  
16  
17  
18  
19  
20  
21  
22  
23  
24  
25  
26  
27  
28  
29  
30  
31  
32  
33  
34  
35  
36  
37  
38  
39  
40  
41  
42  
43  
44  
45  
46

|                                  |                                                                                                                                                                                                                   |                                                      |
|----------------------------------|-------------------------------------------------------------------------------------------------------------------------------------------------------------------------------------------------------------------|------------------------------------------------------|
| Perceived infection risk (scale) | How likely do you think it is that you will be directly and personally affected by the following in the next 6 months? - Catching the coronavirus/COVID-19                                                        | 1= Not at all likely, 7 = Very likely                |
|                                  | How likely do you think it is that your friends and family in the country you are currently living in will be directly affected by the following in the next 6 months? - Catching the coronavirus/COVID-19        | 1= Not at all likely, 7 = Very likely                |
|                                  | How much do you agree or disagree with the following statements? - I will probably get sick with the coronavirus/COVID-19.                                                                                        | 1 = Strongly disagree, 5 = Strongly agree (rescaled) |
| Worry about COVID                | How worried are you personally about the following issues at present? - Coronavirus/COVID-19                                                                                                                      | 1 = Not at all worried, 7 = Very worried             |
| Vaccine - acceptance             | If a vaccine were to be available for the coronavirus/COVID-19 now: - Would you get vaccinated yourself?                                                                                                          | 0 = No, 1 = Yes                                      |
| Vaccine – recommend to others    | If a vaccine were to be available for the coronavirus/COVID-19 now: - Would you recommend vulnerable friends/family to get vaccinated?                                                                            | 0 = No, 1 = Yes                                      |
| General vaccine attitudes        | Please let us know how much you agree or disagree with the following statements about vaccines in general: - I believe that vaccines are a safe and reliable way to help avert the spread of preventable diseases | 1 = Strongly disagree, 5 = Strongly agree            |
|                                  | Please let us know how much you agree or disagree with the following statements about vaccines in general: - Vaccinations are one of the most significant contributions to public health                          | 1 = Strongly disagree, 5 = Strongly agree            |

Table S2

Percentage of missing values for predictor and outcome variables across all samples.

| Variable                                     | AU_D<br>(Mar) | CN_R<br>(Apr) | DE_R<br>(Mar) | ES_R<br>(Mar) | ES_R<br>(May) | FR_B<br>(Apr) | IT_R<br>(Mar) | JP_R<br>(Apr) | KR_R<br>(Apr) | MX_R<br>(Mar) | MX_R<br>(May) | SE_R<br>(Apr) | SE_R<br>(Mar) | UK_P<br>(Jul) | UK_P<br>(Mar) | UK_P<br>(May) | UK_P<br>(Sep) | UK_R<br>(Jul) | UK_R<br>(Jun) | UK_R<br>(May) | UK_R<br>(Oct) | UK_R<br>(Sep) | US_P<br>(Mar) | US_R<br>(May) | US_R<br>(Sep) |
|----------------------------------------------|---------------|---------------|---------------|---------------|---------------|---------------|---------------|---------------|---------------|---------------|---------------|---------------|---------------|---------------|---------------|---------------|---------------|---------------|---------------|---------------|---------------|---------------|---------------|---------------|---------------|
| Age                                          | 5.4           | 0.6           | 3.9           | 2.1           | 1.6           | 0.0           | 20.9          | 2.3           | 0.4           | 8.8           | 1.1           | 1.7           | 4.6           | 0.1           | 0.0           | 0.3           | 0.1           | 1.8           | 1.2           | 1.5           | 1.0           | 1.7           | 0.1           | 1.3           | 0.0           |
| Gender [Female]                              | 0.0           | 0.0           | 0.0           | 0.0           | 0.0           | 0.0           | 0.0           | 0.0           | 0.0           | 0.0           | 0.0           | 0.0           | 0.0           | 0.5           | 0.4           | 0.3           | 0.6           | 0.0           | 0.0           | 0.0           | 0.0           | 0.0           | 0.4           | 0.0           | 0.1           |
| Education                                    | 5.6           | 0.3           | 3.9           | 1.7           | 0.6           | 0.0           | 20.1          | 1.0           | 0.3           | 7.8           | 0.3           | 0.4           | 3.9           | 0.0           | 0.0           | 0.0           | 0.0           | 0.5           | -             | 0.1           | 0.1           | 0.5           | 0.0           | 0.3           | -             |
| Numeracy                                     | 6.7           | 1.9           | 6.6           | 3.1           | 2.7           | 1.1           | 21.1          | 6.2           | 2.0           | 8.1           | 0.3           | 3.1           | 5.6           | 0.1           | 0.1           | 0.3           | 0.2           | 3.5           | 2.2           | 1.8           | 0.9           | 2.3           | 0.1           | 1.4           | 0.2           |
| Politics<br>[Conservative]                   | 5.6           | -             | 4.1           | 2.1           | 0.6           | -             | 20.3          | 9.2           | 0.1           | 7.9           | 0.9           | 0.9           | 4.1           | 0.1           | 0.0           | 0.1           | 0.1           | 0.6           | 1.2           | 0.3           | 0.3           | 0.8           | 0.0           | 0.4           | 0.2           |
| Prosociality                                 | 1.0           | 0.1           | 0.3           | 0.7           | 0.1           | 0.0           | 1.7           | 0.0           | 0.1           | 0.7           | 0.0           | 0.0           | 0.7           | 0.0           | 0.0           | 0.0           | 0.0           | 0.5           | 0.0           | 0.6           | 0.1           | 0.2           | 0.0           | 0.1           | 0.0           |
| General social trust                         | 0.0           | 0.0           | 0.1           | 0.3           | 0.3           | 0.0           | 0.4           | 0.0           | 0.1           | 0.0           | 0.3           | 0.4           | 0.0           | 0.0           | 0.0           | 0.0           | 0.1           | 0.0           | 0.0           | 0.1           | 0.1           | 0.2           | 0.0           | 0.1           | 0.0           |
| General trust: Experts                       | 0.0           | 0.0           | 0.3           | 0.0           | 0.3           | 0.0           | 0.3           | 0.0           | 0.1           | 0.4           | 0.1           | 0.1           | 0.0           | 0.0           | 0.0           | 0.1           | 0.0           | 0.1           | 0.4           | 0.3           | 0.1           | 0.4           | 0.0           | 0.0           | 0.0           |
| General trust:Govt                           | 0.1           | -             | 0.3           | 0.0           | 0.1           | 0.0           | 0.9           | 0.1           | 0.1           | 0.3           | 0.3           | 0.1           | 0.0           | 0.0           | 0.0           | 0.1           | 0.0           | 0.0           | 0.0           | 0.2           | 0.0           | 0.2           | 0.0           | 0.0           | 0.1           |
| COVID trust:<br>Politicians                  | 3.4           | -             | 1.7           | 1.3           | 0.0           | 0.0           | 10.0          | 0.4           | 0.1           | 4.8           | 0.3           | 0.1           | 2.3           | 0.1           | 0.0           | 0.0           | 0.0           | 0.1           | 0.2           | 0.1           | 0.0           | 0.2           | 0.0           | 0.1           | 0.0           |
| COVID Trust:<br>National sci/med<br>advisors | 3.4           | -             | 1.7           | 1.3           | 0.1           | 0.0           | 10.0          | 0.3           | 0.0           | 4.8           | 0.3           | 0.1           | 2.3           | 0.0           | 0.0           | 0.0           | 0.0           | 0.1           | 0.2           | 0.1           | 0.0           | 0.1           | 0.0           | 0.3           | -             |
| COVID Trust:<br>Independent scientists       | 3.4           | -             | 1.7           | 1.6           | 0.1           | 0.0           | 10.1          | 0.3           | 0.0           | 4.8           | 0.3           | 0.0           | 2.3           | 0.0           | 0.0           | 0.0           | 0.0           | 0.1           | -             | 0.2           | 0.0           | 0.1           | 0.1           | 0.3           | -             |
| COVID Trust: WHO                             | 3.4           | -             | 2.0           | 1.4           | 0.0           | 0.0           | 10.0          | 0.6           | 0.1           | 4.9           | 0.3           | 0.0           | 2.3           | 0.0           | 0.0           | 0.1           | 0.0           | 0.2           | 0.2           | 0.2           | 0.0           | 0.1           | 0.1           | 0.3           | -             |
| Personal efficacy                            | 3.7           | -             | 2.0           | 1.3           | 0.0           | 0.0           | 10.3          | 0.6           | 0.1           | 4.8           | 0.3           | 0.0           | 2.4           | 0.0           | 0.1           | 0.0           | 0.2           | 0.2           | 0.4           | 0.3           | 0.1           | 0.2           | 0.0           | 0.3           | 0.0           |
| Govt efficacy                                | 3.6           | -             | 2.0           | 1.4           | 0.3           | 0.0           | 10.4          | 0.4           | 0.1           | 4.8           | 0.6           | 0.0           | 2.4           | 0.0           | 0.0           | 0.0           | 0.1           | 0.2           | 0.2           | 0.3           | 0.0           | 0.1           | 0.0           | 0.3           | 0.1           |
| Perceived infection<br>risk                  | 1.4           | 0.3           | 1.0           | 0.9           | 0.0           | 0.0           | 3.0           | 0.0           | 0.0           | 1.7           | 0.1           | 0.0           | 1.1           | 0.0           | 0.0           | 0.0           | 0.0           | 0.1           | 0.4           | 0.2           | 0.2           | 0.0           | 0.1           | 0.4           | 0.0           |
| Worry about COVID                            | 1.0           | 0.0           | 0.6           | 0.6           | 0.0           | 0.0           | 2.4           | 0.1           | 0.3           | 1.4           | 0.0           | 0.0           | 0.7           | 0.0           | 0.0           | 0.0           | 0.0           | 0.1           | 0.2           | 0.3           | 0.0           | 0.1           | 0.1           | 0.1           | 0.0           |
| Vaccine acceptance                           | 4.0           | 0.1           | 1.9           | 1.4           | 0.1           | 0.0           | 11.4          | 0.1           | 0.1           | 5.8           | 0.3           | 0.4           | 2.4           | 0.1           | 0.0           | 0.0           | 0.0           | 0.2           | 0.2           | 0.3           | 0.1           | 0.1           | 0.1           | 0.1           | 0.0           |
| Vaccine recommend                            | 4.1           | 0.1           | 1.9           | 1.6           | 0.1           | 0.0           | 11.4          | 0.1           | 0.1           | 6.3           | 0.6           | 0.4           | 2.4           | 0.1           | 0.0           | 0.1           | 0.1           | 0.2           | 0.2           | 0.4           | 0.1           | 0.1           | 0.1           | 0.1           | 0.0           |
| Vaccine attitudes                            | -             | -             | -             | -             | -             | -             | -             | -             | -             | -             | -             | -             | -             | -             | -             | -             | 0.3           | -             | -             | -             | 0.2           | 0.3           | -             | -             | -             |

‘-’ indicates variable not included in survey. For space, samples are defined by their two character ISO country code and a letter denoting participant source (B, BVA; D, Dynata; P, Prolific; R, Respondi). Missing gender includes ‘Other’ and ‘prefer’ not to say’ responses (total  $n = 35$ ) and missing age includes values outside the range of 18-100 (total  $n = 46$ )



Table S3

Gender and age distribution of those participants who answered the vaccine acceptance item (% of each sample; continued on following page)

| Gender  | Age bracket | AU_D1 | CN_R1 | DE_R1 | ES_R1 | ES_R2 | FR_B1 | IT_R1 | JP_R1 | KR_R1 | MX_R1 | MX_R2 | SE_R1 | SE_R2 |
|---------|-------------|-------|-------|-------|-------|-------|-------|-------|-------|-------|-------|-------|-------|-------|
| Male    | 18-24       | 6.0   | 5.7   | 5.2   | 4.5   | 4.7   | 1.2   | 4.8   | 4.9   | 5.6   | 9.8   | 9.9   | 5.3   | 5.7   |
|         | 24-34       | 8.3   | 10.9  | 8.7   | 7.4   | 7.6   | 6.2   | 8.4   | 7.3   | 8.6   | 12.4  | 11.8  | 10.5  | 10.5  |
|         | 35-44       | 8.6   | 9.3   | 8.6   | 10.4  | 10.6  | 7.6   | 9.4   | 8.7   | 9.6   | 10.0  | 10.7  | 9.2   | 9.0   |
|         | 45-54       | 8.2   | 11.3  | 10.0  | 10.9  | 10.7  | 10.2  | 10.7  | 10.2  | 11.2  | 8.9   | 8.3   | 9.8   | 9.5   |
|         | 55-64       | 7.6   | 8.2   | 10.5  | 9.0   | 8.9   | 8.6   | 8.6   | 8.2   | 10.2  | 5.8   | 5.4   | 8.6   | 8.8   |
|         | 65+         | 9.2   | 5.7   | 7.7   | 7.0   | 7.2   | 13.8  | 6.8   | 9.7   | 6.0   | 3.2   | 3.0   | 8.1   | 7.8   |
|         | Missing     | 0.0   | 0.0   | 0.0   | 0.0   | 0.0   | 0.0   | 0.0   | 0.0   | 0.0   | 0.0   | 0.0   | 0.0   | 0.0   |
| Female  | 18-24       | 5.7   | 5.4   | 5.2   | 4.5   | 4.7   | 8.5   | 4.8   | 5.0   | 5.3   | 8.9   | 10.0  | 5.0   | 5.5   |
|         | 24-34       | 9.5   | 10.4  | 8.4   | 7.8   | 7.7   | 8.7   | 8.4   | 7.6   | 8.2   | 12.9  | 12.3  | 10.3  | 10.0  |
|         | 35-44       | 10.1  | 8.9   | 8.4   | 10.9  | 10.7  | 8.4   | 10.5  | 9.2   | 9.2   | 12.1  | 11.3  | 8.9   | 8.5   |
|         | 45-54       | 9.4   | 10.9  | 9.5   | 10.9  | 11.0  | 9.5   | 12.4  | 10.5  | 10.7  | 8.7   | 8.6   | 9.4   | 9.3   |
|         | 55-64       | 7.9   | 7.9   | 9.9   | 9.3   | 8.9   | 6.7   | 7.6   | 8.6   | 9.7   | 5.4   | 5.7   | 8.4   | 8.3   |
|         | 65+         | 9.5   | 5.4   | 7.7   | 7.5   | 7.3   | 10.7  | 7.7   | 10.2  | 5.9   | 2.0   | 2.9   | 6.6   | 7.2   |
| Missing | 18-24       | 0.0   | 0.0   | 0.0   | 0.0   | 0.0   | 0.0   | 0.0   | 0.0   | 0.0   | 0.0   | 0.0   | 0.0   | 0.0   |
|         | 24-34       | 0.0   | 0.0   | 0.0   | 0.0   | 0.0   | 0.0   | 0.0   | 0.0   | 0.0   | 0.0   | 0.0   | 0.0   | 0.0   |
|         | 35-44       | 0.0   | 0.0   | 0.0   | 0.0   | 0.0   | 0.0   | 0.0   | 0.0   | 0.0   | 0.0   | 0.0   | 0.0   | 0.0   |
|         | 45-54       | 0.0   | 0.0   | 0.0   | 0.0   | 0.0   | 0.0   | 0.0   | 0.0   | 0.0   | 0.0   | 0.0   | 0.0   | 0.0   |
|         | 55-64       | 0.0   | 0.0   | 0.0   | 0.0   | 0.0   | 0.0   | 0.0   | 0.0   | 0.0   | 0.0   | 0.0   | 0.0   | 0.0   |
|         | 65+         | 0.0   | 0.0   | 0.0   | 0.0   | 0.0   | 0.0   | 0.0   | 0.0   | 0.0   | 0.0   | 0.0   | 0.0   | 0.0   |

For space, samples are defined by their two character ISO country code and a letter denoting participant source (B, BVA; D, Dynata; P, Prolific; R, Respondi). 'Missing' gender includes responses 'Other' and 'Prefer not to say' - only included in Prolific samples.

Table S3 (continued)

Gender and age distribution of those participants who answered the vaccine acceptance item (% of each sample)

| Gender  | Age bracket | UK_P1 | UK_P3 | UK_P4 | UK_P5 | UK_R2 | UK_R3 | UK_R4 | UK_R5 | UK_R6 | US_P1 | US_R2 | US_R3 |
|---------|-------------|-------|-------|-------|-------|-------|-------|-------|-------|-------|-------|-------|-------|
| Male    | 18-24       | 5.6   | 7.2   | 7.1   | 11.7  | 5.8   | 4.2   | 5.8   | 5.9   | 5.5   | 5.9   | 6.3   | 3.4   |
|         | 24-34       | 10.0  | 8.8   | 9.4   | 15.1  | 8.7   | 8.0   | 8.8   | 8.9   | 7.8   | 10.1  | 9.6   | 12.5  |
|         | 35-44       | 8.3   | 9.3   | 9.4   | 7.7   | 9.2   | 9.4   | 9.3   | 9.3   | 8.7   | 9.0   | 8.7   | 12.0  |
|         | 45-54       | 8.5   | 8.6   | 8.5   | 6.4   | 9.2   | 9.6   | 9.2   | 9.2   | 10.2  | 9.0   | 8.7   | 5.7   |
|         | 55-64       | 11.7  | 9.3   | 8.2   | 5.7   | 8.3   | 8.4   | 8.2   | 8.2   | 8.4   | 8.6   | 8.9   | 9.2   |
|         | 65+         | 4.7   | 5.5   | 4.6   | 1.7   | 6.7   | 7.0   | 7.0   | 7.0   | 7.0   | 7.3   | 6.4   | 6.7   |
|         | Missing     | 0.0   | 0.2   | 0.0   | 0.0   | 0.0   | 0.0   | 0.0   | 0.0   | 0.0   | 0.0   | 0.0   | 0.0   |
| Female  | 18-24       | 5.6   | 5.1   | 6.1   | 10.9  | 6.3   | 7.0   | 6.3   | 6.2   | 5.7   | 4.9   | 6.6   | 5.3   |
|         | 24-34       | 8.8   | 9.8   | 9.1   | 11.5  | 9.5   | 10.0  | 9.6   | 9.5   | 8.4   | 11.3  | 10.0  | 11.3  |
|         | 35-44       | 9.3   | 9.9   | 8.9   | 8.8   | 10.0  | 10.2  | 10.0  | 9.9   | 9.5   | 7.6   | 9.2   | 9.2   |
|         | 45-54       | 8.3   | 7.7   | 10.2  | 8.6   | 10.0  | 10.2  | 9.8   | 9.8   | 10.6  | 8.7   | 9.0   | 8.1   |
|         | 55-64       | 12.9  | 13.1  | 11.8  | 8.8   | 8.9   | 8.8   | 8.6   | 8.7   | 9.5   | 11.7  | 9.3   | 10.3  |
|         | 65+         | 6.1   | 5.1   | 6.3   | 2.7   | 7.2   | 7.0   | 7.5   | 7.5   | 8.4   | 6.6   | 7.0   | 6.3   |
| Missing | 18-24       | 0.0   | 0.1   | 0.2   | 0.4   | 0.0   | 0.0   | 0.0   | 0.0   | 0.0   | 0.3   | 0.0   | 0.0   |
|         | 24-34       | 0.3   | 0.1   | 0.2   | 0.1   | 0.0   | 0.0   | 0.0   | 0.0   | 0.0   | 0.0   | 0.0   | 0.1   |
|         | 35-44       | 0.0   | 0.0   | 0.0   | 0.1   | 0.0   | 0.0   | 0.0   | 0.0   | 0.0   | 0.1   | 0.0   | 0.0   |
|         | 45-54       | 0.0   | 0.1   | 0.0   | 0.1   | 0.0   | 0.0   | 0.0   | 0.0   | 0.0   | 0.0   | 0.0   | 0.0   |
|         | 55-64       | 0.1   | 0.0   | 0.1   | 0.0   | 0.0   | 0.0   | 0.0   | 0.0   | 0.0   | 0.0   | 0.0   | 0.0   |
|         | 65+         | 0.0   | 0.1   | 0.0   | 0.0   | 0.0   | 0.0   | 0.0   | 0.0   | 0.0   | 0.0   | 0.0   | 0.0   |

For space, samples are defined by their two character ISO country code and a letter denoting participant source (B, BVA; D, Dynata; P, Prolific; R, Respondi). 'Missing' gender includes responses 'Other' and 'Prefer not to say' - only included in Prolific samples.

Table S4

Descriptive statistics for all samples (Mean (SD)) (continued on following page)

|                                          | ALL              | AU_D<br>(Mar)    | CN_R<br>(Apr)    | DE_R<br>(Mar)    | ES_R<br>(Mar)    | ES_R<br>(May)    | FR_B<br>(Apr)               | IT_R<br>(Mar)    | JP_R<br>(Apr)    | KR_R<br>(Apr)    | MX_R<br>(Mar)    | MX_R<br>(May)    | SE_R<br>(Mar)    | SE_R<br>(Apr)    |
|------------------------------------------|------------------|------------------|------------------|------------------|------------------|------------------|-----------------------------|------------------|------------------|------------------|------------------|------------------|------------------|------------------|
| Age                                      | 45.06<br>(16.02) | 46.30<br>(16.44) | 43.21<br>(14.26) | 46.71<br>(15.93) | 46.68<br>(14.99) | 46.00<br>(15.03) | 48.79<br>(16.53)            | 45.91<br>(14.81) | 48.08<br>(16.35) | 45.34<br>(15.51) | 38.69<br>(13.96) | 38.61<br>(14.21) | 45.49<br>(16.02) | 45.49<br>(16.54) |
| Gender (Female)                          | 0.51<br>(0.50)   | 0.51<br>(0.50)   | 0.49<br>(0.50)   | 0.50<br>(0.50)   | 0.51<br>(0.50)   | 0.50<br>(0.50)   | 0.48<br>(0.50)              | 0.50<br>(0.50)   | 0.51<br>(0.50)   | 0.49<br>(0.50)   | 0.50<br>(0.50)   | 0.51<br>(0.50)   | 0.49<br>(0.50)   | 0.49<br>(0.50)   |
| Education                                | 3.42<br>(1.13)   | 3.17<br>(1.12)   | 3.64<br>(0.88)   | 3.07<br>(1.19)   | 3.59<br>(1.08)   | 3.60<br>(1.07)   | 5.00 <sup>a</sup><br>(1.12) | 3.51<br>(1.23)   | 3.56<br>(0.81)   | 3.76<br>(0.79)   | 3.55<br>(0.94)   | 3.74<br>(0.88)   | 3.30<br>(1.06)   | 3.34<br>(1.01)   |
| Numeracy                                 | 2.66<br>(1.11)   | 2.41<br>(1.06)   | 2.83<br>(1.25)   | 2.53<br>(1.12)   | 2.39<br>(1.03)   | 2.42<br>(0.97)   | 2.18<br>(0.70)              | 2.13<br>(0.71)   | 2.77<br>(1.25)   | 2.60<br>(1.06)   | 2.16<br>(0.90)   | 2.31<br>(0.95)   | 2.52<br>(1.23)   | 2.57<br>(1.21)   |
| Politics (Conservative)                  | 3.74<br>(1.41)   | 3.83<br>(1.30)   | -                | 3.79<br>(1.19)   | 3.50<br>(1.43)   | 3.44<br>(1.50)   | -                           | 3.87<br>(1.45)   | 4.09<br>(1.09)   | 3.88<br>(1.20)   | 3.65<br>(1.31)   | 3.57<br>(1.33)   | 3.92<br>(1.59)   | 3.88<br>(1.61)   |
| Prosociality                             | 5.21<br>(1.36)   | 5.23<br>(1.36)   | 5.54<br>(1.19)   | 4.97<br>(1.42)   | 5.74<br>(1.21)   | 5.35<br>(1.34)   | 5.23<br>(1.41)              | 5.76<br>(1.38)   | 4.74<br>(1.42)   | 4.40<br>(1.31)   | 5.34<br>(1.61)   | 5.26<br>(1.53)   | 4.87<br>(1.43)   | 4.63<br>(1.48)   |
| General social trust                     | 3.66<br>(1.71)   | 3.95<br>(1.67)   | 4.96<br>(1.67)   | 3.61<br>(1.65)   | 3.47<br>(1.87)   | 3.29<br>(1.77)   | 2.98<br>(1.62)              | 3.70<br>(1.61)   | 3.85<br>(1.48)   | 3.97<br>(1.50)   | 2.81<br>(1.84)   | 2.94<br>(1.84)   | 3.73<br>(1.73)   | 3.85<br>(1.73)   |
| General trust: Experts                   | 3.97<br>(0.77)   | 3.97<br>(0.79)   | 4.26<br>(0.61)   | 3.90<br>(0.74)   | 4.19<br>(0.72)   | 4.09<br>(0.76)   | 3.76<br>(0.81)              | 4.02<br>(0.74)   | 3.51<br>(0.72)   | 3.74<br>(0.68)   | 4.05<br>(0.85)   | 4.10<br>(0.83)   | 3.90<br>(0.75)   | 3.85<br>(0.75)   |
| General trust: Govt                      | 2.64<br>(0.91)   | 2.96<br>(0.93)   | -                | 3.14<br>(0.92)   | 2.75<br>(0.94)   | 2.54<br>(0.89)   | 2.48<br>(0.90)              | 2.89<br>(0.91)   | 2.46<br>(0.84)   | 2.65<br>(0.81)   | 2.28<br>(1.01)   | 2.35<br>(1.02)   | 3.04<br>(1.00)   | 3.00<br>(1.01)   |
| COVID trust: Politicians                 | 3.48<br>(1.87)   | 4.44<br>(1.75)   | -                | 4.80<br>(1.65)   | 4.01<br>(1.88)   | 3.45<br>(1.91)   | 3.33<br>(1.78)              | 4.35<br>(1.74)   | 3.03<br>(1.60)   | 4.24<br>(1.63)   | 3.22<br>(1.99)   | 3.51<br>(1.96)   | 4.13<br>(1.78)   | 4.24<br>(1.83)   |
| COVID Trust: National sci/med advisors   | 4.91<br>(1.60)   | 5.34<br>(1.41)   | -                | 5.40<br>(1.43)   | 5.45<br>(1.39)   | 4.92<br>(1.65)   | 4.46<br>(1.73)              | 5.42<br>(1.40)   | 3.90<br>(1.51)   | 5.15<br>(1.37)   | 5.18<br>(1.69)   | 5.28<br>(1.60)   | 4.78<br>(1.67)   | 4.93<br>(1.66)   |
| COVID Trust: Independent scientists      | 4.66<br>(1.55)   | 4.77<br>(1.49)   | -                | 5.11<br>(1.38)   | 5.15<br>(1.39)   | 4.83<br>(1.55)   | 4.62<br>(1.52)              | 4.80<br>(1.45)   | 3.73<br>(1.51)   | 5.03<br>(1.26)   | 5.02<br>(1.68)   | 4.91<br>(1.65)   | 4.66<br>(1.52)   | 4.55<br>(1.48)   |
| COVID Trust: WHO                         | 4.84<br>(1.68)   | 5.19<br>(1.55)   | -                | 5.16<br>(1.52)   | 5.46<br>(1.42)   | 4.88<br>(1.62)   | 4.80<br>(1.61)              | 5.25<br>(1.48)   | 3.12<br>(1.55)   | 3.96<br>(1.51)   | 5.80<br>(1.45)   | 5.58<br>(1.62)   | 5.05<br>(1.45)   | 4.81<br>(1.55)   |
| Personal efficacy                        | 5.22<br>(1.48)   | 5.14<br>(1.45)   | -                | 5.24<br>(1.41)   | 5.31<br>(1.47)   | 5.14<br>(1.47)   | 5.20<br>(1.47)              | 5.31<br>(1.46)   | 4.26<br>(1.42)   | 5.42<br>(1.24)   | 5.36<br>(1.66)   | 5.56<br>(1.53)   | 5.20<br>(1.50)   | 5.26<br>(1.45)   |
| Govt efficacy                            | 3.86<br>(1.78)   | 4.48<br>(1.63)   | -                | 4.68<br>(1.47)   | 4.21<br>(1.77)   | 4.11<br>(1.83)   | 4.22<br>(1.68)              | 4.60<br>(1.60)   | 3.21<br>(1.52)   | 5.08<br>(1.52)   | 3.82<br>(2.06)   | 4.39<br>(1.86)   | 4.30<br>(1.73)   | 4.41<br>(1.67)   |
| Perceived infection risk                 | 4.17<br>(1.32)   | 4.16<br>(1.40)   | 3.26<br>(1.37)   | 4.13<br>(1.34)   | 4.46<br>(1.23)   | 4.38<br>(1.26)   | 4.19<br>(1.24)              | 3.93<br>(1.30)   | 4.48<br>(1.20)   | 4.37<br>(1.22)   | 4.16<br>(1.47)   | 4.29<br>(1.43)   | 4.30<br>(1.37)   | 4.37<br>(1.29)   |
| Worry about COVID                        | 5.56<br>(1.52)   | 5.56<br>(1.51)   | 5.37<br>(1.57)   | 5.66<br>(1.49)   | 6.25<br>(1.17)   | 6.11<br>(1.26)   | 5.63<br>(1.43)              | 6.08<br>(1.27)   | 5.83<br>(1.28)   | 5.59<br>(1.29)   | 5.92<br>(1.46)   | 6.06<br>(1.35)   | 5.27<br>(1.55)   | 4.98<br>(1.66)   |
| Vaccine – acceptance                     | 0.76<br>(0.43)   | 0.83<br>(0.38)   | 0.86<br>(0.35)   | 0.81<br>(0.39)   | 0.84<br>(0.37)   | 0.80<br>(0.40)   | 0.70<br>(0.46)              | 0.85<br>(0.35)   | 0.74<br>(0.44)   | 0.86<br>(0.35)   | 0.88<br>(0.32)   | 0.74<br>(0.44)   | 0.66<br>(0.47)   | 0.63<br>(0.48)   |
| Vaccine – recommend to vulnerable others | 0.82<br>(0.38)   | 0.89<br>(0.32)   | 0.87<br>(0.33)   | 0.89<br>(0.31)   | 0.90<br>(0.30)   | 0.82<br>(0.38)   | 0.81<br>(0.40)              | 0.88<br>(0.32)   | 0.80<br>(0.40)   | 0.88<br>(0.32)   | 0.90<br>(0.30)   | 0.76<br>(0.43)   | 0.77<br>(0.42)   | 0.74<br>(0.44)   |
| General vaccine attitudes                | 4.05<br>(1.11)   | -                | -                | -                | -                | -                | -                           | -                | -                | -                | -                | -                | -                | -                |

<sup>a</sup> Education item in France differed from other surveys – see Table S1.

Table S4 (continued)

Descriptive statistics for all samples (Mean (SD))

|                                          | UK_P<br>(Mar)    | UK_P<br>(May)    | UK_P<br>(Jul)    | UK_P<br>(Sep)    | UK_R<br>(May)    | UK_R<br>(Jun)    | UK_R<br>(Jul)    | UK_R<br>(Sep)    | UK_R<br>(Oct)    | US_P<br>(Mar)    | US_R<br>(May)    | US_R<br>(Sep)    |
|------------------------------------------|------------------|------------------|------------------|------------------|------------------|------------------|------------------|------------------|------------------|------------------|------------------|------------------|
| Age                                      | 45.63<br>(15.69) | 44.72<br>(15.66) | 44.54<br>(15.65) | 38.18<br>(14.98) | 45.72<br>(15.94) | 45.90<br>(15.87) | 45.42<br>(16.60) | 45.47<br>(16.09) | 46.74<br>(16.04) | 45.14<br>(15.84) | 45.03<br>(16.09) | 44.76<br>(15.60) |
| Gender (Female)                          | 0.51<br>(0.50)   | 0.51<br>(0.50)   | 0.53<br>(0.50)   | 0.52<br>(0.50)   | 0.52<br>(0.50)   | 0.53<br>(0.50)   | 0.52<br>(0.50)   | 0.52<br>(0.50)   | 0.52<br>(0.50)   | 0.51<br>(0.50)   | 0.51<br>(0.50)   | 0.51<br>(0.50)   |
| Education                                | 3.45<br>(1.17)   | 3.50<br>(1.14)   | 3.58<br>(1.14)   | 3.54<br>(1.10)   | 3.17<br>(1.27)   | -                | 3.20<br>(1.23)   | 3.15<br>(1.28)   | 3.10<br>(1.23)   | 3.87<br>(0.88)   | 3.70<br>(0.90)   | -                |
| Numeracy                                 | 3.22<br>(1.17)   | 3.23<br>(1.14)   | 3.04<br>(1.06)   | 3.24<br>(1.15)   | 2.64<br>(1.14)   | 2.74<br>(1.10)   | 2.61<br>(1.07)   | 2.60<br>(1.07)   | 2.78<br>(1.11)   | 3.14<br>(1.13)   | 2.76<br>(1.14)   | 2.58<br>(1.12)   |
| Politics (Conservative)                  | 3.69<br>(1.43)   | 3.67<br>(1.39)   | 3.58<br>(1.36)   | 3.37<br>(1.36)   | 3.90<br>(1.35)   | 3.89<br>(1.19)   | 3.90<br>(1.33)   | 3.84<br>(1.36)   | 3.83<br>(1.32)   | 3.22<br>(1.65)   | 3.92<br>(1.69)   | 4.07<br>(1.65)   |
| Prosociality                             | 5.50<br>(1.07)   | 5.36<br>(1.19)   | 5.32<br>(1.16)   | 5.42<br>(1.17)   | 5.12<br>(1.33)   | 5.25<br>(1.29)   | 5.03<br>(1.29)   | 5.08<br>(1.39)   | 5.38<br>(1.36)   | 5.43<br>(1.28)   | 5.05<br>(1.36)   | 5.02<br>(1.44)   |
| General social trust                     | 4.04<br>(1.59)   | 4.12<br>(1.55)   | 4.11<br>(1.55)   | 3.69<br>(1.56)   | 3.74<br>(1.71)   | 3.58<br>(1.70)   | 3.86<br>(1.59)   | 3.68<br>(1.68)   | 3.66<br>(1.64)   | 4.01<br>(1.68)   | 3.79<br>(1.73)   | 3.47<br>(1.84)   |
| General trust: Experts                   | 4.24<br>(0.66)   | 4.11<br>(0.63)   | 4.14<br>(0.66)   | 4.17<br>(0.68)   | 3.89<br>(0.79)   | 3.88<br>(0.81)   | 3.92<br>(0.76)   | 3.90<br>(0.78)   | 3.92<br>(0.77)   | 4.22<br>(0.73)   | 3.96<br>(0.77)   | 3.89<br>(0.83)   |
| General trust: Govt                      | 2.82<br>(0.85)   | 2.80<br>(0.82)   | 2.60<br>(0.82)   | 2.44<br>(0.81)   | 2.82<br>(0.87)   | 2.64<br>(0.87)   | 2.70<br>(0.88)   | 2.60<br>(0.90)   | 2.55<br>(0.86)   | 2.55<br>(0.79)   | 2.68<br>(0.83)   | 2.52<br>(0.88)   |
| COVID trust: Politicians                 | 3.81<br>(1.78)   | 3.80<br>(1.81)   | 3.16<br>(1.80)   | 2.57<br>(1.65)   | 4.00<br>(1.86)   | 3.38<br>(1.70)   | 3.60<br>(1.83)   | 3.23<br>(1.86)   | 3.04<br>(1.79)   | 3.06<br>(1.74)   | 3.11<br>(1.77)   | 2.93<br>(1.81)   |
| COVID Trust: National sci/med advisors   | 5.27<br>(1.47)   | 5.13<br>(1.41)   | 5.12<br>(1.47)   | 4.88<br>(1.58)   | 4.94<br>(1.57)   | 4.58<br>(1.51)   | 4.88<br>(1.53)   | 4.66<br>(1.61)   | 4.60<br>(1.66)   | 5.46<br>(1.41)   | 5.15<br>(1.55)   | -                |
| COVID Trust: Independent scientists      | 4.88<br>(1.48)   | 4.59<br>(1.44)   | 4.74<br>(1.48)   | 4.77<br>(1.60)   | 4.46<br>(1.52)   | -                | 4.54<br>(1.52)   | 4.40<br>(1.61)   | 4.28<br>(1.63)   | 5.16<br>(1.48)   | 4.72<br>(1.60)   | -                |
| COVID Trust: WHO                         | 5.59<br>(1.40)   | 4.97<br>(1.55)   | 5.02<br>(1.62)   | 4.77<br>(1.70)   | 4.76<br>(1.69)   | 4.46<br>(1.69)   | 4.72<br>(1.66)   | 4.50<br>(1.69)   | 4.44<br>(1.71)   | 5.62<br>(1.55)   | 4.57<br>(1.90)   | -                |
| Personal efficacy                        | 5.04<br>(1.39)   | 5.59<br>(1.26)   | 5.47<br>(1.35)   | 5.12<br>(1.48)   | 5.36<br>(1.48)   | 5.13<br>(1.45)   | 5.30<br>(1.45)   | 5.09<br>(1.52)   | 5.03<br>(1.52)   | 5.25<br>(1.45)   | 5.32<br>(1.47)   | 5.14<br>(1.57)   |
| Govt efficacy                            | 3.86<br>(1.75)   | 3.85<br>(1.70)   | 3.48<br>(1.72)   | 3.03<br>(1.62)   | 4.13<br>(1.74)   | 3.66<br>(1.61)   | 3.88<br>(1.75)   | 3.58<br>(1.73)   | 3.36<br>(1.70)   | 3.28<br>(1.80)   | 3.76<br>(1.76)   | 3.25<br>(1.86)   |
| Perceived infection risk                 | 4.89<br>(1.32)   | 4.26<br>(1.24)   | 3.96<br>(1.24)   | 4.26<br>(1.30)   | 4.14<br>(1.22)   | 3.94<br>(1.25)   | 3.86<br>(1.25)   | 4.13<br>(1.28)   | 4.27<br>(1.24)   | 3.98<br>(1.52)   | 3.91<br>(1.38)   | 4.11<br>(1.38)   |
| Worry about COVID                        | 5.80<br>(1.36)   | 5.72<br>(1.40)   | 5.28<br>(1.52)   | 5.36<br>(1.58)   | 5.60<br>(1.51)   | 5.34<br>(1.57)   | 5.30<br>(1.60)   | 5.39<br>(1.61)   | 5.39<br>(1.63)   | 5.49<br>(1.58)   | 5.58<br>(1.60)   | 5.43<br>(1.72)   |
| Vaccine – acceptance                     | 0.80<br>(0.40)   | 0.80<br>(0.40)   | 0.79<br>(0.41)   | 0.73<br>(0.44)   | 0.79<br>(0.41)   | 0.79<br>(0.41)   | 0.80<br>(0.40)   | 0.76<br>(0.43)   | 0.72<br>(0.45)   | 0.76<br>(0.43)   | 0.75<br>(0.44)   | 0.63<br>(0.48)   |
| Vaccine – recommend to vulnerable others | 0.92<br>(0.28)   | 0.87<br>(0.34)   | 0.85<br>(0.36)   | 0.80<br>(0.40)   | 0.84<br>(0.36)   | 0.83<br>(0.38)   | 0.84<br>(0.36)   | 0.80<br>(0.40)   | 0.76<br>(0.43)   | 0.86<br>(0.35)   | 0.80<br>(0.40)   | 0.68<br>(0.47)   |
| General vaccine attitudes                | -                | -                | -                | 4.21<br>(1.10)   | -                | -                | -                | 3.90<br>(1.14)   | 4.05<br>(1.06)   | -                | -                | -                |

1  
2  
3  
4  
5  
6  
7  
8  
9  
10  
11  
12  
13  
14  
15  
16  
17  
18  
19  
20  
21  
22  
23  
24  
25  
26  
27  
28  
29  
30  
31  
32  
33  
34  
35  
36  
37  
38  
39  
40  
41  
42  
43  
44  
45  
46

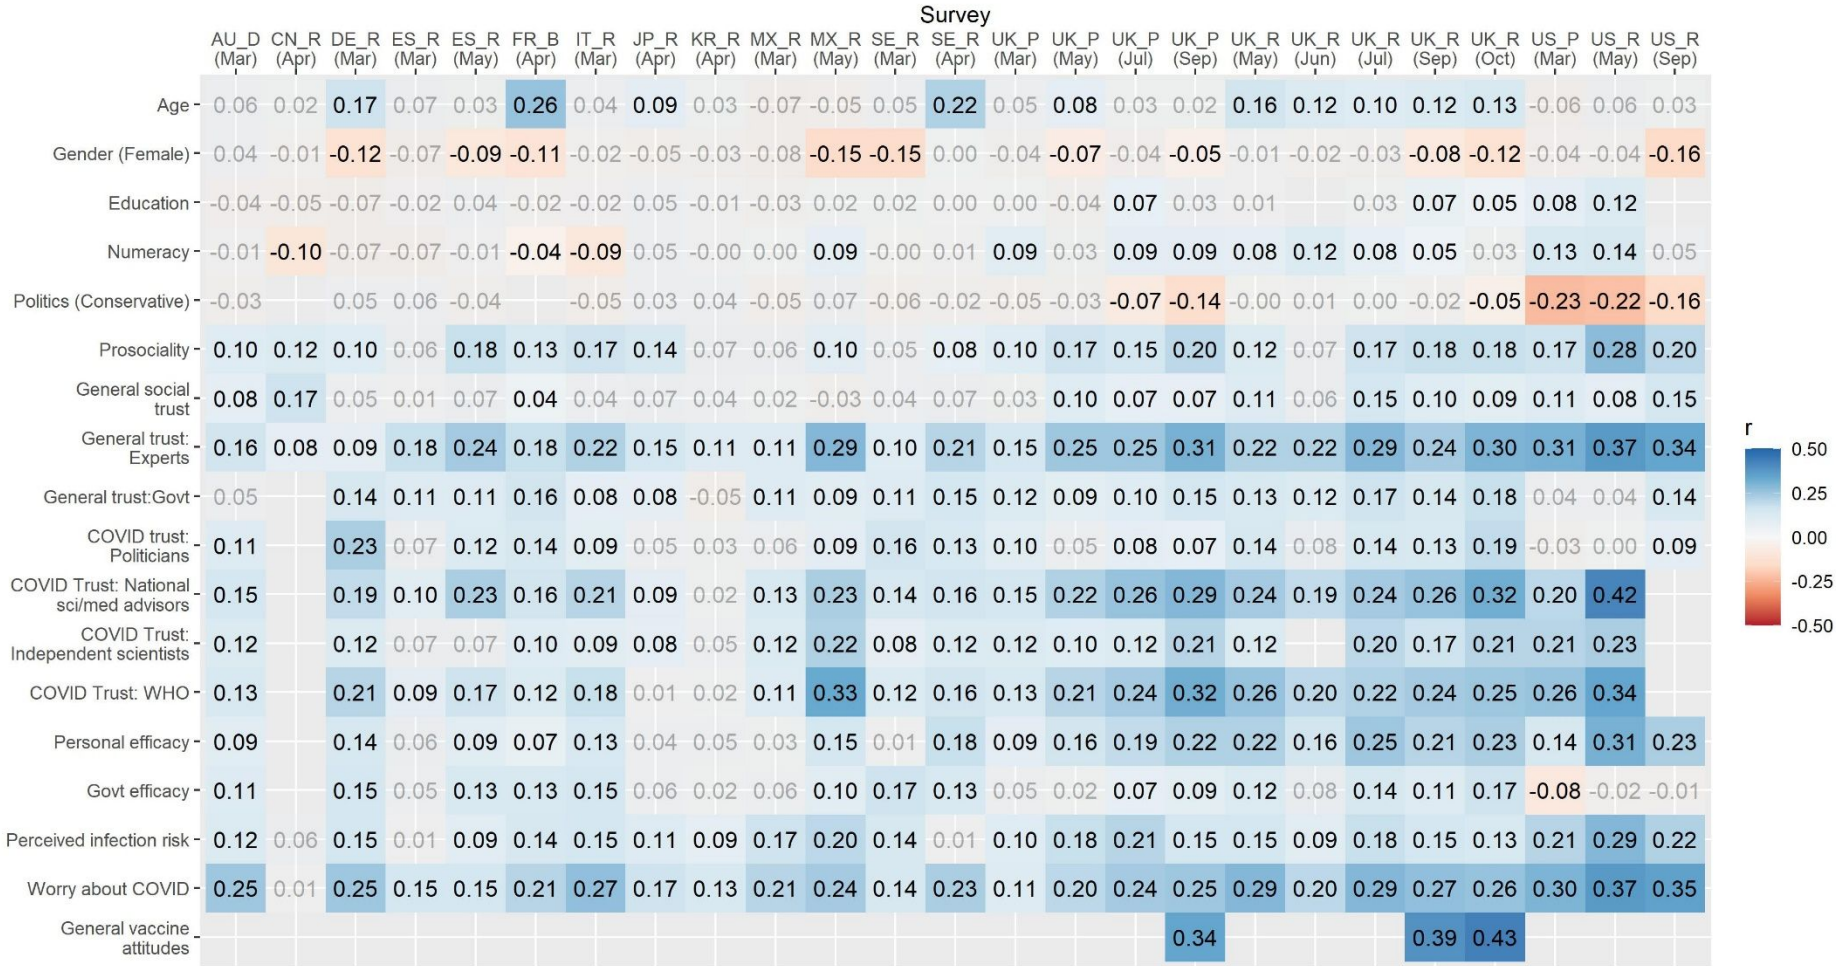

Figure S1. Point biserial correlations between predictors and vaccine acceptance across all samples. Greyed values are non-significant ( $p > .05$ ). Blank spaces indicate predictors which were not included in a given survey



Table S5

Full logistic regression results from model predicting vaccine acceptance (continued on following page)

|                                        | ALL           | ALL (-UK)     | AU_D (Mar)    | DE_R (Mar)     | ES_R (Mar)     | ES_R (May)     | FR_B (Apr)    | IT_R (Mar)     | JP_R (Apr)    | KR_R (Apr)     | MX_R (Mar)     | MX_R (May)    | SE_R (Mar)    | SE_R (Apr)    |
|----------------------------------------|---------------|---------------|---------------|----------------|----------------|----------------|---------------|----------------|---------------|----------------|----------------|---------------|---------------|---------------|
|                                        | OR            | OR            | OR            | OR             | OR             | OR             | OR            | OR             | OR            | OR             | OR             | OR            | OR            | OR            |
| (Intercept)                            | 5.22 ***      | 5.05 ***      | 5.59 ***      | 9.30 ***       | 8.06 ***       | 7.35 ***       | 3.35 ***      | 11.64 ***      | 3.70 ***      | 7.89 ***       | 14.91 ***      | 5.36 ***      | 3.17 ***      | 2.22 ***      |
|                                        | [4.92 – 5.53] | [4.63 – 5.53] | [4.08 – 7.83] | [6.46 – 13.85] | [5.71 – 11.73] | [5.28 – 10.50] | [2.93 – 3.84] | [7.49 – 19.01] | [2.78 – 4.99] | [5.66 – 11.31] | [9.54 – 24.65] | [3.94 – 7.44] | [2.45 – 4.15] | [1.72 – 2.88] |
| Age                                    | 1.19 ***      | 1.08 **       | 1.12          | 1.63 ***       | 1.11           | 1              | 1.68 ***      | 1.08           | 1.23          | 0.97           | 0.75 *         | 0.87          | 1.12          | 1.44 ***      |
|                                        | [1.14 – 1.23] | [1.02 – 1.15] | [0.88 – 1.42] | [1.29 – 2.09]  | [0.88 – 1.40]  | [0.80 – 1.25]  | [1.53 – 1.84] | [0.80 – 1.44]  | [1.00 – 1.52] | [0.77 – 1.23]  | [0.57 – 0.98]  | [0.71 – 1.06] | [0.93 – 1.34] | [1.19 – 1.76] |
| Gender (Female) <sup>a</sup>           | 0.59 ***      | 0.61 ***      | 1.2           | 0.38 ***       | 0.53 **        | 0.47 ***       | 0.65 ***      | 0.59           | 0.76          | 0.75           | 0.50 *         | 0.43 ***      | 0.43 ***      | 0.71          |
|                                        | [0.55 – 0.64] | [0.55 – 0.69] | [0.76 – 1.88] | [0.23 – 0.60]  | [0.33 – 0.84]  | [0.30 – 0.72]  | [0.54 – 0.77] | [0.34 – 1.03]  | [0.50 – 1.13] | [0.48 – 1.19]  | [0.28 – 0.88]  | [0.28 – 0.64] | [0.30 – 0.63] | [0.49 – 1.03] |
| Education                              | 1.03          | 1             | 0.85          | 0.86           | 0.96           | 1.11           | 0.99          | 0.98           | 1.13          | 0.98           | 0.95           | 0.98          | 1.05          | 0.97          |
|                                        | [0.99 – 1.08] | [0.94 – 1.07] | [0.67 – 1.07] | [0.68 – 1.08]  | [0.77 – 1.19]  | [0.90 – 1.36]  | [0.91 – 1.09] | [0.74 – 1.31]  | [0.93 – 1.39] | [0.78 – 1.23]  | [0.71 – 1.26]  | [0.81 – 1.19] | [0.88 – 1.25] | [0.81 – 1.16] |
| Numeracy                               | 1.01          | 0.94 *        | 0.91          | 0.84           | 0.80 *         | 0.88           | 0.90 *        | 0.64 **        | 0.99          | 0.92           | 0.95           | 1             | 0.91          | 1.01          |
|                                        | [0.97 – 1.05] | [0.89 – 0.99] | [0.73 – 1.15] | [0.67 – 1.05]  | [0.65 – 0.98]  | [0.72 – 1.09]  | [0.82 – 0.99] | [0.48 – 0.84]  | [0.81 – 1.23] | [0.73 – 1.16]  | [0.73 – 1.26]  | [0.82 – 1.22] | [0.76 – 1.10] | [0.84 – 1.21] |
| Politics (Conservative)                | 0.93 ***      | 0.94 *        | 0.87          | 1.2            | 1.23           | 1.06           |               | 0.88           | 1.02          | 1.02           | 0.85           | 1.18          | 0.9           | 0.91          |
|                                        | [0.89 – 0.97] | [0.89 – 0.99] | [0.68 – 1.11] | [0.96 – 1.52]  | [0.98 – 1.55]  | [0.84 – 1.33]  |               | [0.66 – 1.18]  | [0.84 – 1.25] | [0.80 – 1.30]  | [0.64 – 1.13]  | [0.96 – 1.44] | [0.74 – 1.08] | [0.75 – 1.10] |
| Prosociality                           | 1.06 **       | 1.05          | 0.98          | 1.06           | 0.98           | 1.2            | 1.07          | 1.05           | 1.16          | 1.26           | 1              | 0.98          | 0.96          | 0.96          |
|                                        | [1.02 – 1.10] | [0.99 – 1.12] | [0.75 – 1.26] | [0.82 – 1.36]  | [0.78 – 1.23]  | [0.96 – 1.50]  | [0.98 – 1.17] | [0.78 – 1.40]  | [0.93 – 1.45] | [0.98 – 1.62]  | [0.76 – 1.31]  | [0.80 – 1.20] | [0.79 – 1.15] | [0.79 – 1.16] |
| General social trust                   | 1.05 *        | 1.05          | 1.18          | 0.96           | 0.92           | 1.15           | 1             | 0.99           | 0.97          | 1.14           | 1.26           | 0.93          | 0.97          | 1.01          |
|                                        | [1.01 – 1.10] | [0.99 – 1.11] | [0.91 – 1.52] | [0.75 – 1.24]  | [0.73 – 1.16]  | [0.92 – 1.44]  | [0.91 – 1.10] | [0.74 – 1.34]  | [0.77 – 1.22] | [0.87 – 1.48]  | [0.95 – 1.70]  | [0.76 – 1.14] | [0.80 – 1.19] | [0.83 – 1.24] |
| General trust: Experts                 | 1.28 ***      | 1.26 ***      | 1.38 *        | 0.89           | 1.33 *         | 1.55 ***       | 1.18 **       | 1.45 *         | 1.25          | 1.3            | 1.05           | 1.49 ***      | 1.14          | 1.18          |
|                                        | [1.22 – 1.34] | [1.18 – 1.36] | [1.06 – 1.80] | [0.66 – 1.20]  | [1.03 – 1.74]  | [1.23 – 1.97]  | [1.06 – 1.31] | [1.04 – 2.01]  | [0.97 – 1.60] | [1.00 – 1.71]  | [0.78 – 1.41]  | [1.18 – 1.88] | [0.91 – 1.44] | [0.95 – 1.48] |
| General trust: Govt                    | 1.02          | 0.94          | 0.74          | 1.07           | 1.24           | 1.01           | 1.08          | 0.97           | 1.07          | 0.70 *         | 1.28           | 1.02          | 0.98          | 1.06          |
|                                        | [0.97 – 1.08] | [0.87 – 1.01] | [0.54 – 1.00] | [0.77 – 1.48]  | [0.91 – 1.69]  | [0.76 – 1.34]  | [0.94 – 1.23] | [0.68 – 1.39]  | [0.81 – 1.40] | [0.52 – 0.93]  | [0.88 – 1.87]  | [0.78 – 1.32] | [0.75 – 1.27] | [0.79 – 1.42] |
| COVID trust: Politicians               | 1.06          | 1.03          | 1.14          | 1.50 *         | 1.16           | 1.13           | 1.11          | 0.72           | 0.98          | 1.17           | 0.92           | 1.1           | 1.16          | 0.89          |
|                                        | [0.99 – 1.13] | [0.94 – 1.13] | [0.78 – 1.66] | [1.02 – 2.21]  | [0.83 – 1.63]  | [0.81 – 1.57]  | [0.97 – 1.27] | [0.45 – 1.12]  | [0.67 – 1.41] | [0.86 – 1.58]  | [0.61 – 1.37]  | [0.81 – 1.48] | [0.85 – 1.58] | [0.64 – 1.23] |
| COVID Trust: National sci/med advisors | 1.22 ***      | 1.22 ***      | 1.08          | 0.94           | 0.95           | 1.66 ***       | 1.22 **       | 1.12           | 1.08          | 0.88           | 1.23           | 1.1           | 1.04          | 1.04          |
|                                        | [1.15 – 1.29] | [1.12 – 1.33] | [0.76 – 1.52] | [0.63 – 1.41]  | [0.69 – 1.31]  | [1.24 – 2.24]  | [1.08 – 1.39] | [0.72 – 1.77]  | [0.79 – 1.48] | [0.63 – 1.24]  | [0.89 – 1.70]  | [0.83 – 1.44] | [0.77 – 1.39] | [0.77 – 1.41] |
| COVID Trust: Independent scientists    | 0.95 *        | 1             | 1.02          | 0.89           | 1              | 0.73 *         | 0.98          | 0.99           | 1.05          | 1.01           | 1.05           | 1.13          | 0.98          | 1.03          |
|                                        | [0.91 – 1.00] | [0.93 – 1.07] | [0.76 – 1.34] | [0.65 – 1.22]  | [0.76 – 1.32]  | [0.56 – 0.95]  | [0.89 – 1.09] | [0.70 – 1.37]  | [0.78 – 1.41] | [0.74 – 1.37]  | [0.77 – 1.41]  | [0.89 – 1.42] | [0.78 – 1.23] | [0.83 – 1.27] |
| COVID Trust: WHO                       | 1.19 ***      | 1.11 **       | 0.96          | 1.58 **        | 1              | 1.03           | 1.05          | 1.11           | 0.9           | 1.07           | 1.13           | 1.57 ***      | 1.17          | 1.27 *        |
|                                        | [1.14 – 1.25] | [1.04 – 1.19] | [0.71 – 1.28] | [1.16 – 2.15]  | [0.74 – 1.33]  | [0.78 – 1.35]  | [0.94 – 1.18] | [0.74 – 1.63]  | [0.69 – 1.18] | [0.83 – 1.38]  | [0.83 – 1.54]  | [1.22 – 2.01] | [0.92 – 1.48] | [1.01 – 1.60] |
| Personal efficacy                      | 1             | 0.92 *        | 0.85          | 1.04           | 0.93           | 0.91           | 0.87 **       | 1.02           | 0.92          | 1.01           | 0.85           | 0.82          | 0.73 **       | 1.09          |
|                                        | [0.96 – 1.05] | [0.86 – 0.98] | [0.64 – 1.12] | [0.80 – 1.34]  | [0.71 – 1.21]  | [0.71 – 1.16]  | [0.79 – 0.96] | [0.73 – 1.44]  | [0.72 – 1.18] | [0.75 – 1.36]  | [0.61 – 1.16]  | [0.64 – 1.05] | [0.59 – 0.90] | [0.90 – 1.32] |
| Govt efficacy                          | 1.01          | 1.07          | 1.25          | 0.93           | 0.97           | 1.08           | 1.05          | 1.35           | 1.15          | 1.05           | 1.01           | 0.87          | 1.2           | 1.13          |
|                                        | [0.96 – 1.08] | [0.99 – 1.16] | [0.88 – 1.79] | [0.69 – 1.25]  | [0.70 – 1.33]  | [0.79 – 1.47]  | [0.93 – 1.19] | [0.92 – 1.98]  | [0.81 – 1.64] | [0.75 – 1.46]  | [0.68 – 1.51]  | [0.65 – 1.17] | [0.90 – 1.61] | [0.85 – 1.50] |
| Perceived infection risk               | 1.13 ***      | 1.14 ***      | 1.06          | 1.49 **        | 1              | 1.11           | 1.29 ***      | 1.47 **        | 1.2           | 1.07           | 1.44 *         | 1.28 *        | 1.33 **       | 0.79 *        |
|                                        | [1.08 – 1.17] | [1.08 – 1.21] | [0.82 – 1.37] | [1.16 – 1.92]  | [0.80 – 1.25]  | [0.89 – 1.38]  | [1.18 – 1.42] | [1.11 – 1.95]  | [0.97 – 1.48] | [0.83 – 1.38]  | [1.07 – 1.94]  | [1.03 – 1.59] | [1.09 – 1.62] | [0.65 – 0.97] |
| Worry about COVID                      | 1.47 ***      | 1.51 ***      | 1.69 ***      | 1.33 *         | 1.36 *         | 1.19           | 1.36 ***      | 1.54 **        | 1.33 **       | 1.24           | 1.66 ***       | 1.31 *        | 1.34 **       | 1.77 ***      |
|                                        | [1.41 – 1.53] | [1.42 – 1.60] | [1.34 – 2.16] | [1.05 – 1.69]  | [1.07 – 1.73]  | [0.95 – 1.48]  | [1.24 – 1.50] | [1.18 – 2.03]  | [1.07 – 1.65] | [0.96 – 1.59]  | [1.26 – 2.21]  | [1.05 – 1.62] | [1.10 – 1.63] | [1.44 – 2.19] |
| Observations                           | 19216         | 8398          | 644           | 639            | 668            | 666            | 2969          | 530            | 590           | 677            | 624            | 682           | 652           | 653           |
| R <sup>2</sup> Tjur                    | 0.128         | 0.101         | 0.096         | 0.184          | 0.061          | 0.137          | 0.151         | 0.141          | 0.077         | 0.04           | 0.115          | 0.197         | 0.102         | 0.132         |

Odds ratios [95CI] shown, all continuous measures were standardized (scaled and mean-centered) prior to analysis. For space, samples are defined by their two character ISO country code and a letter denoting participant source (B, BVA; D, Dynata; P Prolific; R, Respondi). <sup>a</sup>Gender is unstandardized. Political orientation data was not collected in France; this sample is excluded from pooled data.

\*p < .05, \*\*p < .01, \*\*\* p < .001

Table S5 (continued)

Full logistic regression results from model predicting vaccine acceptance

|                                        | UK_P (Mar)    | UK_P (May)     | UK_P (Jul)    | UK_P (Sep)    | UK_R (May)    | UK_R (Jul)    | UK_R (Sep)    | UK_R (Oct)    | US_P (Mar)    | US_R (May)    |
|----------------------------------------|---------------|----------------|---------------|---------------|---------------|---------------|---------------|---------------|---------------|---------------|
|                                        | OR            | OR             | OR            | OR            | OR            | OR            | OR            | OR            | OR            | OR            |
| (Intercept)                            | 5.20 ***      | 7.58 ***       | 6.42 ***      | 4.14 ***      | 5.62 ***      | 6.68 ***      | 5.56 ***      | 4.91 ***      | 4.66 ***      | 5.12 ***      |
|                                        | [3.87 – 7.11] | [5.81 – 10.07] | [5.06 – 8.23] | [3.47 – 4.98] | [4.37 – 7.33] | [5.22 – 8.68] | [4.57 – 6.81] | [4.05 – 6.00] | [3.46 – 6.38] | [3.71 – 7.21] |
| Age                                    | 1.18          | 1.38 ***       | 1.20 *        | 1.12          | 1.48 ***      | 1.38 ***      | 1.39 ***      | 1.37 ***      | 0.91          | 1.2           |
|                                        | [0.96 – 1.46] | [1.15 – 1.65]  | [1.02 – 1.42] | [0.99 – 1.27] | [1.23 – 1.80] | [1.16 – 1.65] | [1.21 – 1.59] | [1.20 – 1.58] | [0.74 – 1.13] | [0.95 – 1.52] |
| Gender (Female)                        | 0.79          | 0.53 ***       | 0.56 ***      | 0.62 ***      | 0.78          | 0.68 *        | 0.50 ***      | 0.44 ***      | 0.72          | 0.74          |
|                                        | [0.52 – 1.20] | [0.37 – 0.75]  | [0.41 – 0.76] | [0.49 – 0.79] | [0.55 – 1.08] | [0.49 – 0.94] | [0.38 – 0.64] | [0.34 – 0.57] | [0.48 – 1.09] | [0.48 – 1.13] |
| Education                              | 0.98          | 0.85           | 1.13          | 1.02          | 1.05          | 1.07          | 1.11          | 1.18 *        | 1.08          | 1.05          |
|                                        | [0.80 – 1.21] | [0.71 – 1.00]  | [0.97 – 1.32] | [0.91 – 1.15] | [0.88 – 1.24] | [0.91 – 1.26] | [0.98 – 1.27] | [1.04 – 1.34] | [0.88 – 1.32] | [0.85 – 1.30] |
| Numeracy                               | 1.30 *        | 0.99           | 1.20 *        | 1.12          | 1.24 *        | 1.11          | 1             | 1             | 1.21          | 1.41 **       |
|                                        | [1.05 – 1.62] | [0.84 – 1.17]  | [1.02 – 1.41] | [0.99 – 1.26] | [1.05 – 1.48] | [0.95 – 1.32] | [0.88 – 1.14] | [0.88 – 1.13] | [0.98 – 1.50] | [1.13 – 1.78] |
| Politics (Conservative)                | 0.83          | 0.9            | 0.92          | 0.85 *        | 0.91          | 0.95          | 0.88          | 0.86 *        | 0.73 *        | 0.77          |
|                                        | [0.66 – 1.05] | [0.74 – 1.09]  | [0.77 – 1.11] | [0.74 – 0.97] | [0.76 – 1.10] | [0.79 – 1.13] | [0.77 – 1.01] | [0.75 – 0.99] | [0.57 – 0.93] | [0.58 – 1.01] |
| Prosociality                           | 1.09          | 1.19 *         | 1.15          | 1.11          | 0.89          | 1.04          | 1.09          | 1.07          | 1             | 1.2           |
|                                        | [0.89 – 1.34] | [1.01 – 1.41]  | [0.99 – 1.34] | [0.98 – 1.26] | [0.74 – 1.06] | [0.88 – 1.23] | [0.96 – 1.25] | [0.94 – 1.23] | [0.81 – 1.23] | [0.96 – 1.51] |
| General social trust                   | 0.85          | 1.04           | 0.94          | 1.03          | 1.06          | 1.19          | 1.09          | 0.97          | 1.14          | 0.97          |
|                                        | [0.68 – 1.06] | [0.86 – 1.25]  | [0.79 – 1.12] | [0.91 – 1.17] | [0.88 – 1.27] | [1.00 – 1.43] | [0.96 – 1.25] | [0.85 – 1.11] | [0.90 – 1.44] | [0.77 – 1.23] |
| General trust: Experts                 | 1.06          | 1.39 **        | 1.38 ***      | 1.39 ***      | 1.12          | 1.42 ***      | 1.23 **       | 1.45 ***      | 1.53 **       | 1.36 *        |
|                                        | [0.83 – 1.34] | [1.13 – 1.70]  | [1.16 – 1.65] | [1.20 – 1.60] | [0.91 – 1.38] | [1.17 – 1.71] | [1.06 – 1.44] | [1.24 – 1.70] | [1.16 – 2.03] | [1.02 – 1.82] |
| General trust:Govt                     | 1.27          | 1              | 1.06          | 1.27 **       | 1.13          | 1.11          | 1.14          | 1.03          | 0.87          | 0.96          |
|                                        | [0.96 – 1.68] | [0.79 – 1.27]  | [0.86 – 1.31] | [1.08 – 1.51] | [0.90 – 1.43] | [0.88 – 1.38] | [0.95 – 1.37] | [0.86 – 1.22] | [0.67 – 1.13] | [0.72 – 1.28] |
| COVID trust: Politicians               | 1.17          | 0.98           | 1.1           | 0.93          | 1.01          | 1.2           | 1.11          | 1.26 *        | 1.21          | 1.01          |
|                                        | [0.82 – 1.67] | [0.73 – 1.31]  | [0.85 – 1.44] | [0.76 – 1.14] | [0.76 – 1.33] | [0.89 – 1.62] | [0.88 – 1.39] | [1.01 – 1.56] | [0.86 – 1.69] | [0.73 – 1.40] |
| COVID Trust: National sci/med advisors | 1.18          | 1.50 ***       | 1.22          | 1.14          | 1.17          | 0.95          | 1.25 *        | 1.29 **       | 0.78          | 1.95 ***      |
|                                        | [0.88 – 1.59] | [1.18 – 1.89]  | [0.99 – 1.50] | [0.97 – 1.34] | [0.92 – 1.50] | [0.74 – 1.22] | [1.04 – 1.50] | [1.07 – 1.56] | [0.57 – 1.04] | [1.41 – 2.73] |
| COVID Trust: Independent scientists    | 1.08          | 0.89           | 0.83 *        | 0.93          | 0.84          | 1.02          | 0.88          | 1             | 1.12          | 0.81          |
|                                        | [0.84 – 1.37] | [0.73 – 1.08]  | [0.69 – 0.99] | [0.80 – 1.07] | [0.68 – 1.04] | [0.83 – 1.25] | [0.74 – 1.04] | [0.85 – 1.17] | [0.89 – 1.41] | [0.62 – 1.06] |
| COVID Trust: WHO                       | 1.05          | 1.26 *         | 1.24 *        | 1.45 ***      | 1.52 ***      | 1.06          | 1.32 **       | 1.04          | 1.17          | 1.02          |
|                                        | [0.80 – 1.35] | [1.04 – 1.53]  | [1.03 – 1.50] | [1.25 – 1.68] | [1.22 – 1.88] | [0.85 – 1.32] | [1.11 – 1.57] | [0.87 – 1.24] | [0.90 – 1.51] | [0.76 – 1.37] |
| Personal efficacy                      | 1.06          | 1.1            | 1.05          | 1.1           | 1.06          | 1.16          | 1.03          | 1.03          | 1.23          | 1.08          |
|                                        | [0.86 – 1.31] | [0.92 – 1.30]  | [0.89 – 1.23] | [0.96 – 1.25] | [0.87 – 1.29] | [0.96 – 1.39] | [0.89 – 1.18] | [0.89 – 1.18] | [0.99 – 1.52] | [0.84 – 1.38] |
| Govt efficacy                          | 0.84          | 0.82           | 1.06          | 1             | 1.02          | 0.96          | 0.95          | 1.04          | 1.05          | 0.98          |
|                                        | [0.62 – 1.13] | [0.63 – 1.05]  | [0.83 – 1.34] | [0.84 – 1.20] | [0.79 – 1.30] | [0.73 – 1.27] | [0.77 – 1.17] | [0.86 – 1.27] | [0.77 – 1.43] | [0.72 – 1.34] |
| Perceived infection risk               | 1.18          | 1.39 ***       | 1.30 **       | 1.04          | 1.19          | 1.18          | 1.09          | 0.99          | 1.26          | 1.46 **       |
|                                        | [0.96 – 1.46] | [1.16 – 1.66]  | [1.09 – 1.54] | [0.90 – 1.18] | [1.00 – 1.42] | [0.98 – 1.41] | [0.94 – 1.26] | [0.86 – 1.13] | [1.00 – 1.59] | [1.14 – 1.86] |
| Worry about COVID-19                   | 1.1           | 1.25 *         | 1.41 ***      | 1.37 ***      | 1.58 ***      | 1.63 ***      | 1.56 ***      | 1.43 ***      | 1.47 **       | 1.27          |
|                                        | [0.88 – 1.36] | [1.04 – 1.48]  | [1.19 – 1.66] | [1.19 – 1.57] | [1.33 – 1.88] | [1.36 – 1.96] | [1.36 – 1.80] | [1.23 – 1.65] | [1.17 – 1.87] | [0.99 – 1.64] |
| Observations                           | 698           | 1143           | 1314          | 1845          | 1095          | 1249          | 1772          | 1702          | 693           | 680           |
| R <sup>2</sup> Tjur                    | 0.068         | 0.172          | 0.165         | 0.192         | 0.168         | 0.169         | 0.174         | 0.192         | 0.184         | 0.283         |

Odds ratios [95CI] shown, all continuous measures were standardized (scaled and mean-centered) prior to analysis. For space, samples are defined by their two character ISO country code and a letter denoting participant source (R, Respondi; P, Prolific). <sup>a</sup>Gender is unstandardized

\*p < .05, \*\*p < .01, \*\*\* p < .001



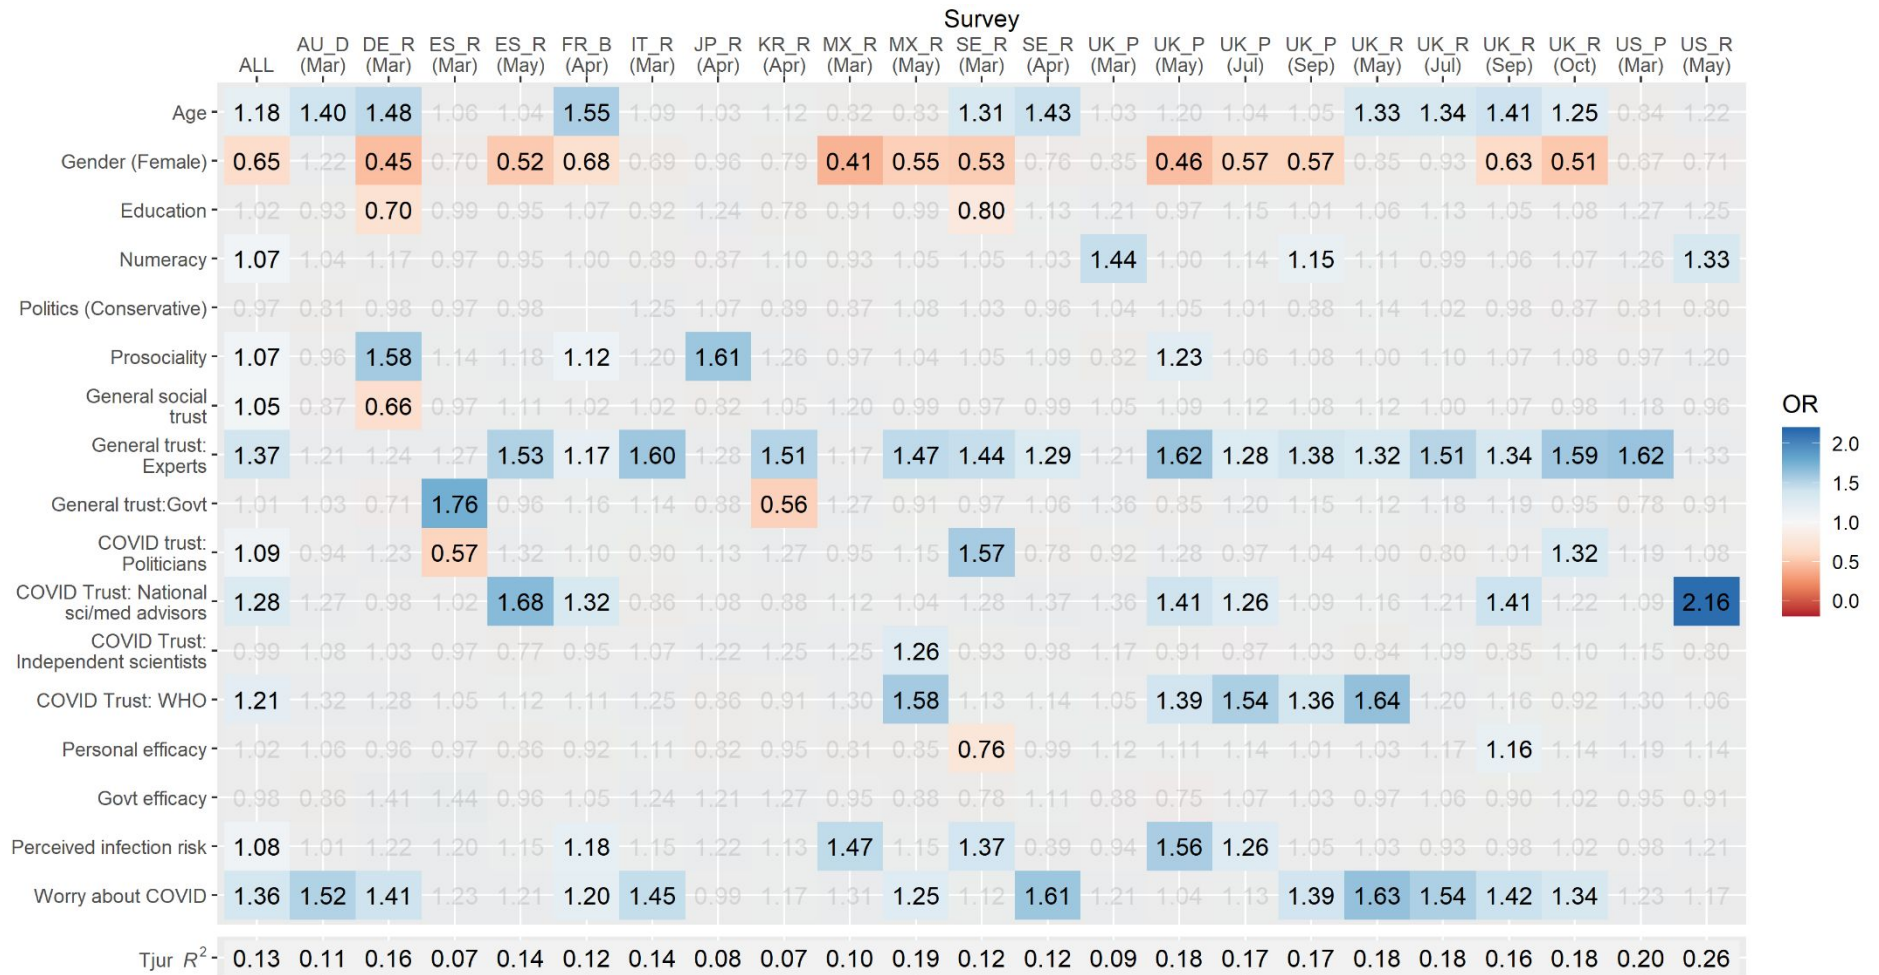

Figure S2. Heatmap of odds ratios in model predicting recommending vaccine to vulnerable friends/family. Columns represent individual samples and rows represent predictors in model. Grey values are non-significant,  $p > .05$ . Red shading indicates a lower likelihood of vaccine acceptance and blue shading a higher likelihood. For space, samples are defined by their two character ISO country code and a letter denoting participant source (B, BVA; D, Dynata; R, Respondi). Political orientation data was not collected in France, this sample is excluded from pooled data.

Table S6

Full logistic regression results from model predicting vaccine recommendation to vulnerable friends or family (continued on following page)

|                                        | ALL           | AU_D<br>(Mar)  | DE_R<br>(Mar)   | ES_R<br>(Mar)  | ES_R<br>(May)  | FR_B<br>(Apr) | IT_R<br>(Mar)  | JP_R<br>(Apr) | KR_R<br>(Apr)  | MX_R<br>(Mar)   | MX_R<br>(May) | SE_R<br>(Mar) | SE_R<br>(Apr) |
|----------------------------------------|---------------|----------------|-----------------|----------------|----------------|---------------|----------------|---------------|----------------|-----------------|---------------|---------------|---------------|
|                                        | OR            | OR             | OR              | OR             | OR             | OR            | OR             | OR            | OR             | OR              | OR            | OR            | OR            |
| (Intercept)                            | 7.64 ***      | 10.40 ***      | 21.06 ***       | 13.37 ***      | 8.84 ***       | 6.45 ***      | 14.40 ***      | 4.88 ***      | 11.66 ***      | 22.54 ***       | 5.04 ***      | 5.49 ***      | 3.72 ***      |
|                                        | [7.15 – 8.17] | [7.01 – 16.08] | [13.01 – 36.22] | [8.82 – 21.29] | [6.21 – 12.98] | [5.50 – 7.61] | [8.98 – 24.48] | [3.58 – 6.79] | [7.94 – 17.84] | [13.36 – 41.23] | [3.72 – 6.96] | [4.05 – 7.60] | [2.80 – 5.01] |
| Age                                    | 1.18 ***      | 1.40 *         | 1.48 *          | 1.06           | 1.04           | 1.55 ***      | 1.09           | 1.03          | 1.12           | 0.82            | 0.83          | 1.31 *        | 1.43 **       |
|                                        | [1.13 – 1.24] | [1.05 – 1.88]  | [1.09 – 2.02]   | [0.80 – 1.41]  | [0.83 – 1.32]  | [1.39 – 1.73] | [0.79 – 1.51]  | [0.81 – 1.29] | [0.86 – 1.48]  | [0.60 – 1.11]   | [0.68 – 1.02] | [1.06 – 1.63] | [1.15 – 1.78] |
| Gender (Female) <sup>a</sup>           | 0.65 ***      | 1.22           | 0.45 **         | 0.7            | 0.52 **        | 0.68 ***      | 0.69           | 0.96          | 0.79           | 0.41 **         | 0.55 **       | 0.53 **       | 0.76          |
|                                        | [0.59 – 0.70] | [0.71 – 2.10]  | [0.25 – 0.81]   | [0.40 – 1.21]  | [0.32 – 0.81]  | [0.56 – 0.84] | [0.37 – 1.26]  | [0.62 – 1.50] | [0.47 – 1.32]  | [0.20 – 0.77]   | [0.36 – 0.82] | [0.35 – 0.81] | [0.50 – 1.13] |
| Education                              | 1.02          | 0.93           | 0.70 *          | 0.99           | 0.95           | 1.07          | 0.92           | 1.24          | 0.78           | 0.91            | 0.99          | 0.80 *        | 1.13          |
|                                        | [0.98 – 1.07] | [0.70 – 1.23]  | [0.52 – 0.93]   | [0.76 – 1.29]  | [0.76 – 1.18]  | [0.97 – 1.18] | [0.67 – 1.26]  | [0.99 – 1.55] | [0.59 – 1.02]  | [0.65 – 1.25]   | [0.81 – 1.21] | [0.65 – 0.98] | [0.93 – 1.37] |
| Numeracy                               | 1.07 ***      | 1.04           | 1.17            | 0.97           | 0.95           | 1             | 0.89           | 0.87          | 1.1            | 0.93            | 1.05          | 1.05          | 1.03          |
|                                        | [1.03 – 1.12] | [0.79 – 1.40]  | [0.88 – 1.58]   | [0.75 – 1.27]  | [0.76 – 1.19]  | [0.91 – 1.11] | [0.65 – 1.23]  | [0.70 – 1.10] | [0.84 – 1.45]  | [0.69 – 1.27]   | [0.86 – 1.29] | [0.85 – 1.30] | [0.85 – 1.27] |
| Politics (Conservative)                | 0.97          | 0.81           | 0.98            | 0.97           | 0.98           |               | 1.25           | 1.07          | 0.89           | 0.87            | 1.08          | 1.03          | 0.96          |
|                                        | [0.93 – 1.01] | [0.60 – 1.08]  | [0.73 – 1.31]   | [0.74 – 1.29]  | [0.77 – 1.24]  |               | [0.91 – 1.72]  | [0.86 – 1.33] | [0.67 – 1.17]  | [0.64 – 1.20]   | [0.89 – 1.32] | [0.84 – 1.27] | [0.78 – 1.19] |
| Prosociality                           | 1.07 **       | 0.96           | 1.58 **         | 1.14           | 1.18           | 1.12 *        | 1.2            | 1.61 ***      | 1.26           | 0.97            | 1.04          | 1.05          | 1.09          |
|                                        | [1.03 – 1.12] | [0.70 – 1.31]  | [1.14 – 2.19]   | [0.87 – 1.49]  | [0.94 – 1.49]  | [1.01 – 1.23] | [0.88 – 1.62]  | [1.26 – 2.07] | [0.95 – 1.66]  | [0.72 – 1.31]   | [0.84 – 1.27] | [0.85 – 1.30] | [0.89 – 1.34] |
| General social trust                   | 1.05 *        | 0.87           | 0.66 *          | 0.97           | 1.11           | 1.02          | 1.02           | 0.82          | 1.05           | 1.2             | 0.99          | 0.97          | 0.99          |
|                                        | [1.00 – 1.10] | [0.62 – 1.19]  | [0.47 – 0.92]   | [0.71 – 1.31]  | [0.87 – 1.41]  | [0.92 – 1.14] | [0.74 – 1.41]  | [0.63 – 1.07] | [0.78 – 1.42]  | [0.88 – 1.68]   | [0.81 – 1.22] | [0.77 – 1.22] | [0.80 – 1.23] |
| General trust: Experts                 | 1.37 ***      | 1.21           | 1.24            | 1.27           | 1.53 ***       | 1.17 **       | 1.60 **        | 1.28          | 1.51 **        | 1.17            | 1.47 **       | 1.44 **       | 1.29 *        |
|                                        | [1.31 – 1.44] | [0.89 – 1.63]  | [0.85 – 1.83]   | [0.93 – 1.74]  | [1.20 – 1.96]  | [1.04 – 1.31] | [1.14 – 2.25]  | [0.97 – 1.69] | [1.12 – 2.05]  | [0.85 – 1.60]   | [1.17 – 1.86] | [1.12 – 1.85] | [1.02 – 1.63] |
| General trust: Govt                    | 1.01          | 1.03           | 0.71            | 1.76 **        | 0.96           | 1.16          | 1.14           | 0.88          | 0.56 ***       | 1.27            | 0.91          | 0.97          | 1.06          |
|                                        | [0.96 – 1.08] | [0.72 – 1.47]  | [0.46 – 1.10]   | [1.20 – 2.62]  | [0.71 – 1.30]  | [0.99 – 1.35] | [0.77 – 1.70]  | [0.66 – 1.18] | [0.40 – 0.77]  | [0.84 – 1.95]   | [0.70 – 1.19] | [0.73 – 1.30] | [0.78 – 1.46] |
| COVID trust: Politicians               | 1.09 *        | 0.94           | 1.23            | 0.57 *         | 1.32           | 1.1           | 0.9            | 1.13          | 1.27           | 0.95            | 1.15          | 1.57 *        | 0.78          |
|                                        | [1.01 – 1.17] | [0.59 – 1.49]  | [0.75 – 2.02]   | [0.36 – 0.89]  | [0.93 – 1.90]  | [0.94 – 1.29] | [0.55 – 1.45]  | [0.75 – 1.72] | [0.89 – 1.82]  | [0.61 – 1.49]   | [0.84 – 1.56] | [1.11 – 2.23] | [0.54 – 1.10] |
| COVID Trust: National sci/med advisors | 1.28 ***      | 1.27           | 0.98            | 1.02           | 1.68 ***       | 1.32 ***      | 0.86           | 1.08          | 0.88           | 1.12            | 1.04          | 1.28          | 1.37          |
|                                        | [1.21 – 1.36] | [0.85 – 1.92]  | [0.59 – 1.60]   | [0.69 – 1.51]  | [1.24 – 2.30]  | [1.14 – 1.52] | [0.54 – 1.37]  | [0.77 – 1.53] | [0.61 – 1.28]  | [0.78 – 1.61]   | [0.78 – 1.37] | [0.93 – 1.75] | [0.99 – 1.91] |
| COVID Trust: Independent scientists    | 0.99          | 1.08           | 1.03            | 0.97           | 0.77           | 0.95          | 1.07           | 1.22          | 1.25           | 1.25            | 1.26 *        | 0.93          | 0.98          |
|                                        | [0.94 – 1.04] | [0.76 – 1.53]  | [0.70 – 1.52]   | [0.68 – 1.36]  | [0.58 – 1.02]  | [0.85 – 1.07] | [0.75 – 1.50]  | [0.88 – 1.70] | [0.89 – 1.74]  | [0.89 – 1.74]   | [1.00 – 1.59] | [0.72 – 1.21] | [0.77 – 1.24] |
| COVID Trust: WHO                       | 1.21 ***      | 1.32           | 1.28            | 1.05           | 1.12           | 1.11          | 1.25           | 0.86          | 0.91           | 1.3             | 1.58 ***      | 1.13          | 1.14          |
|                                        | [1.15 – 1.28] | [0.93 – 1.85]  | [0.86 – 1.90]   | [0.74 – 1.47]  | [0.84 – 1.49]  | [0.98 – 1.26] | [0.83 – 1.86]  | [0.63 – 1.15] | [0.66 – 1.23]  | [0.93 – 1.81]   | [1.23 – 2.02] | [0.87 – 1.47] | [0.89 – 1.46] |
| Personal efficacy                      | 1.02          | 1.06           | 0.96            | 0.97           | 0.86           | 0.92          | 1.11           | 0.82          | 0.95           | 0.81            | 0.85          | 0.76 *        | 0.99          |
|                                        | [0.97 – 1.06] | [0.76 – 1.47]  | [0.70 – 1.30]   | [0.71 – 1.32]  | [0.66 – 1.11]  | [0.82 – 1.02] | [0.77 – 1.59]  | [0.62 – 1.07] | [0.69 – 1.31]  | [0.56 – 1.15]   | [0.66 – 1.10] | [0.60 – 0.96] | [0.80 – 1.22] |
| Govt efficacy                          | 0.98          | 0.86           | 1.41            | 1.44           | 0.96           | 1.05          | 1.24           | 1.21          | 1.27           | 0.95            | 0.88          | 0.78          | 1.11          |
|                                        | [0.92 – 1.05] | [0.55 – 1.33]  | [0.97 – 2.05]   | [0.96 – 2.20]  | [0.69 – 1.33]  | [0.91 – 1.21] | [0.81 – 1.89]  | [0.81 – 1.81] | [0.87 – 1.85]  | [0.61 – 1.48]   | [0.65 – 1.19] | [0.56 – 1.07] | [0.82 – 1.52] |
| Perceived infection risk               | 1.08 ***      | 1.01           | 1.22            | 1.2            | 1.15           | 1.18 **       | 1.15           | 1.22          | 1.13           | 1.47 *          | 1.15          | 1.37 **       | 0.89          |
|                                        | [1.03 – 1.13] | [0.74 – 1.37]  | [0.89 – 1.68]   | [0.91 – 1.58]  | [0.91 – 1.45]  | [1.06 – 1.31] | [0.83 – 1.58]  | [0.96 – 1.55] | [0.84 – 1.50]  | [1.06 – 2.04]   | [0.92 – 1.43] | [1.10 – 1.71] | [0.72 – 1.10] |
| Worry about COVID-19                   | 1.36 ***      | 1.52 **        | 1.41 *          | 1.23           | 1.21           | 1.20 ***      | 1.45 **        | 0.99          | 1.17           | 1.31            | 1.25 *        | 1.12          | 1.61 ***      |
|                                        | [1.30 – 1.42] | [1.15 – 2.03]  | [1.05 – 1.90]   | [0.92 – 1.64]  | [0.96 – 1.52]  | [1.08 – 1.34] | [1.09 – 1.92]  | [0.78 – 1.25] | [0.88 – 1.53]  | [0.96 – 1.79]   | [1.01 – 1.56] | [0.90 – 1.38] | [1.29 – 2.00] |
| Observations                           | 19208         | 643            | 639             | 668            | 667            | 2969          | 530            | 590           | 677            | 620             | 681           | 652           | 653           |
| R <sup>2</sup> Tjur                    | 0.131         | 0.109          | 0.162           | 0.069          | 0.136          | 0.118         | 0.137          | 0.076         | 0.073          | 0.105           | 0.186         | 0.121         | 0.124         |

Odds ratios [95CI] shown, all continuous measures were standardized (scaled and mean-centered) prior to analysis. For space, samples are defined by their two character ISO country code and a letter denoting participant source (D, Dynata; P, Prolific; R, Respondi). <sup>a</sup>Gender is unstandardized. Political orientation data was not collected in France; this sample is excluded from pooled data. \*p < .05, \*\*p < .01, \*\*\*p < .001

Table S6 (continued)

Full logistic regression results from model predicting vaccine recommendation to vulnerable others

|                                        | UK_P (Mar)<br>OR             | UK_P (May)<br>OR             | UK_P (Jul)<br>OR            | UK_P (Sep)<br>OR          | UK_R (May)<br>OR           | UK_R (Jul)<br>OR           | UK_R (Sep)<br>OR          | UK_R (Oct)<br>OR          | US_P (Mar)<br>OR            | US_R (May)<br>OR           |
|----------------------------------------|------------------------------|------------------------------|-----------------------------|---------------------------|----------------------------|----------------------------|---------------------------|---------------------------|-----------------------------|----------------------------|
| (Intercept)                            | 16.28 ***<br>[10.45 – 26.82] | 15.53 ***<br>[11.04 – 22.50] | 10.84 ***<br>[8.18 – 14.64] | 6.56 ***<br>[5.37 – 8.08] | 8.65 ***<br>[6.48 – 11.80] | 8.29 ***<br>[6.34 – 11.02] | 6.65 ***<br>[5.41 – 8.25] | 5.75 ***<br>[4.70 – 7.10] | 11.91 ***<br>[8.02 – 18.38] | 8.09 ***<br>[5.64 – 11.97] |
| Age                                    | 1.03<br>[0.76 – 1.39]        | 1.20<br>[0.97 – 1.49]        | 1.04<br>[0.86 – 1.26]       | 1.05<br>[0.92 – 1.21]     | 1.33 **<br>[1.08 – 1.65]   | 1.34 **<br>[1.10 – 1.64]   | 1.41 ***<br>[1.22 – 1.63] | 1.25 **<br>[1.08 – 1.44]  | 0.84<br>[0.64 – 1.10]       | 1.22<br>[0.94 – 1.58]      |
| Gender (Female)                        | 0.85<br>[0.46 – 1.55]        | 0.46 ***<br>[0.30 – 0.69]    | 0.57 **<br>[0.40 – 0.82]    | 0.57 ***<br>[0.44 – 0.74] | 0.85<br>[0.58 – 1.24]      | 0.93<br>[0.65 – 1.33]      | 0.63 ***<br>[0.48 – 0.82] | 0.51 ***<br>[0.39 – 0.66] | 0.67<br>[0.40 – 1.11]       | 0.71<br>[0.45 – 1.12]      |
| Education                              | 1.21<br>[0.89 – 1.62]        | 0.97<br>[0.79 – 1.18]        | 1.15<br>[0.96 – 1.37]       | 1.01<br>[0.89 – 1.15]     | 1.06<br>[0.88 – 1.29]      | 1.13<br>[0.94 – 1.35]      | 1.05<br>[0.91 – 1.20]     | 1.08<br>[0.94 – 1.23]     | 1.27<br>[0.98 – 1.64]       | 1.25<br>[0.99 – 1.58]      |
| Numeracy                               | 1.44 *<br>[1.05 – 2.02]      | 1.00<br>[0.82 – 1.22]        | 1.14<br>[0.95 – 1.37]       | 1.15 *<br>[1.00 – 1.32]   | 1.11<br>[0.92 – 1.35]      | 0.99<br>[0.83 – 1.19]      | 1.06<br>[0.93 – 1.22]     | 1.07<br>[0.94 – 1.22]     | 1.26<br>[0.96 – 1.66]       | 1.33 *<br>[1.04 – 1.72]    |
| Politics (Conservative)                | 1.04<br>[0.74 – 1.46]        | 1.05<br>[0.84 – 1.32]        | 1.01<br>[0.82 – 1.25]       | 0.88<br>[0.76 – 1.03]     | 1.14<br>[0.92 – 1.41]      | 1.02<br>[0.83 – 1.24]      | 0.98<br>[0.85 – 1.14]     | 0.87<br>[0.75 – 1.00]     | 0.81<br>[0.60 – 1.09]       | 0.80<br>[0.60 – 1.08]      |
| Prosociality                           | 0.82<br>[0.60 – 1.09]        | 1.23 *<br>[1.01 – 1.50]      | 1.06<br>[0.89 – 1.25]       | 1.08<br>[0.94 – 1.23]     | 1.00<br>[0.82 – 1.22]      | 1.1<br>[0.91 – 1.33]       | 1.07<br>[0.93 – 1.23]     | 1.08<br>[0.94 – 1.24]     | 0.97<br>[0.75 – 1.25]       | 1.20<br>[0.94 – 1.53]      |
| General social trust                   | 1.05<br>[0.77 – 1.43]        | 1.09<br>[0.87 – 1.36]        | 1.12<br>[0.92 – 1.37]       | 1.08<br>[0.95 – 1.24]     | 1.12<br>[0.91 – 1.39]      | 1.00<br>[0.81 – 1.21]      | 1.07<br>[0.93 – 1.24]     | 0.98<br>[0.85 – 1.13]     | 1.18<br>[0.89 – 1.57]       | 0.96<br>[0.75 – 1.24]      |
| General trust: Experts                 | 1.21<br>[0.87 – 1.69]        | 1.62 ***<br>[1.28 – 2.05]    | 1.28 *<br>[1.05 – 1.55]     | 1.38 ***<br>[1.19 – 1.61] | 1.32 *<br>[1.05 – 1.66]    | 1.51 ***<br>[1.23 – 1.84]  | 1.34 ***<br>[1.14 – 1.57] | 1.59 ***<br>[1.35 – 1.87] | 1.62 **<br>[1.17 – 2.27]    | 1.33<br>[0.98 – 1.81]      |
| General trust:Govt                     | 1.36<br>[0.90 – 2.06]        | 0.85<br>[0.64 – 1.13]        | 1.2<br>[0.93 – 1.53]        | 1.15<br>[0.96 – 1.38]     | 1.12<br>[0.86 – 1.44]      | 1.18<br>[0.92 – 1.51]      | 1.19<br>[0.98 – 1.44]     | 0.95<br>[0.80 – 1.14]     | 0.78<br>[0.55 – 1.08]       | 0.91<br>[0.67 – 1.24]      |
| COVID trust: Politicians               | 0.92<br>[0.55 – 1.53]        | 1.28<br>[0.91 – 1.83]        | 0.97<br>[0.71 – 1.32]       | 1.04<br>[0.83 – 1.30]     | 1.00<br>[0.73 – 1.37]      | 0.80<br>[0.57 – 1.13]      | 1.01<br>[0.79 – 1.28]     | 1.32 *<br>[1.05 – 1.66]   | 1.19<br>[0.77 – 1.81]       | 1.08<br>[0.75 – 1.54]      |
| COVID Trust: National sci/med advisors | 1.36<br>[0.90 – 2.07]        | 1.41 *<br>[1.07 – 1.85]      | 1.26 *<br>[1.00 – 1.58]     | 1.09<br>[0.91 – 1.30]     | 1.16<br>[0.88 – 1.52]      | 1.21<br>[0.91 – 1.59]      | 1.41 ***<br>[1.16 – 1.72] | 1.22<br>[1.00 – 1.48]     | 1.09<br>[0.76 – 1.55]       | 2.16 ***<br>[1.53 – 3.08]  |
| COVID Trust: Independent scientists    | 1.17<br>[0.83 – 1.64]        | 0.91<br>[0.72 – 1.15]        | 0.87<br>[0.70 – 1.06]       | 1.03<br>[0.88 – 1.20]     | 0.84<br>[0.65 – 1.07]      | 1.09<br>[0.86 – 1.37]      | 0.85<br>[0.71 – 1.01]     | 1.10<br>[0.93 – 1.30]     | 1.15<br>[0.86 – 1.53]       | 0.80<br>[0.59 – 1.06]      |
| COVID Trust: WHO                       | 1.05<br>[0.73 – 1.51]        | 1.39 **<br>[1.11 – 1.75]     | 1.54 ***<br>[1.25 – 1.90]   | 1.36 ***<br>[1.16 – 1.60] | 1.64 ***<br>[1.29 – 2.09]  | 1.2<br>[0.94 – 1.53]       | 1.16<br>[0.96 – 1.39]     | 0.92<br>[0.76 – 1.11]     | 1.30<br>[0.96 – 1.75]       | 1.06<br>[0.76 – 1.47]      |
| Personal efficacy                      | 1.12<br>[0.84 – 1.50]        | 1.11<br>[0.91 – 1.36]        | 1.14<br>[0.95 – 1.35]       | 1.01<br>[0.87 – 1.16]     | 1.03<br>[0.83 – 1.27]      | 1.17<br>[0.96 – 1.43]      | 1.16 *<br>[1.00 – 1.35]   | 1.14<br>[0.99 – 1.32]     | 1.19<br>[0.92 – 1.53]       | 1.14<br>[0.87 – 1.48]      |
| Govt efficacy                          | 0.88<br>[0.57 – 1.36]        | 0.75<br>[0.56 – 1.01]        | 1.07<br>[0.81 – 1.42]       | 1.03<br>[0.85 – 1.25]     | 0.97<br>[0.74 – 1.28]      | 1.06<br>[0.78 – 1.46]      | 0.9<br>[0.72 – 1.12]      | 1.02<br>[0.83 – 1.25]     | 0.95<br>[0.66 – 1.39]       | 0.91<br>[0.65 – 1.29]      |
| Perceived infection risk               | 0.94<br>[0.69 – 1.28]        | 1.56 ***<br>[1.25 – 1.94]    | 1.26 *<br>[1.03 – 1.53]     | 1.05<br>[0.91 – 1.21]     | 1.03<br>[0.84 – 1.27]      | 1.03<br>[0.75 – 1.14]      | 0.98<br>[0.84 – 1.14]     | 1.02<br>[0.88 – 1.17]     | 0.98<br>[0.73 – 1.31]       | 1.21<br>[0.92 – 1.58]      |
| Worry about COVID                      | 1.21<br>[0.89 – 1.62]        | 1.04<br>[0.84 – 1.28]        | 1.13<br>[0.93 – 1.37]       | 1.39 ***<br>[1.20 – 1.62] | 1.63 ***<br>[1.35 – 1.98]  | 1.54 ***<br>[1.26 – 1.89]  | 1.42 ***<br>[1.23 – 1.65] | 1.34 ***<br>[1.15 – 1.55] | 1.23<br>[0.92 – 1.64]       | 1.17<br>[0.89 – 1.53]      |
| Observations                           | 698                          | 1142                         | 1314                        | 1844                      | 1094                       | 1249                       | 1772                      | 1702                      | 693                         | 680                        |
| R <sup>2</sup> Tjur                    | 0.086                        | 0.181                        | 0.169                       | 0.167                     | 0.183                      | 0.185                      | 0.160                     | 0.182                     | 0.200                       | 0.261                      |

Odds ratios [95CI] shown, all continuous measures were standardized (scaled and mean-centered) prior to analysis. For space, samples are defined by their two character ISO country code and a letter denoting participant source (D, Dynata; P, Prolific; R, Respondi). <sup>a</sup>Gender is unstandardized. \*p < .05, \*\*p < .01, \*\*\* p < .001

Table S7

Results of multi-level model (samples nested by country, month) adjusting for survey-level variables.

|                                        | <i>OR</i>     | <i>CI</i>   |
|----------------------------------------|---------------|-------------|
| (Intercept)                            | 5.33 ***      | 4.16 – 6.84 |
| Age                                    | 1.20 ***      | 1.15 – 1.25 |
| Gender (Female)                        | 0.58 ***      | 0.54 – 0.63 |
| Education                              | 1.02          | 0.98 – 1.07 |
| Numeracy                               | 1.02          | 0.98 – 1.06 |
| Politics (Conservative)                | 0.93 ***      | 0.89 – 0.97 |
| Prosociality                           | 1.06 **       | 1.02 – 1.10 |
| General social trust                   | 1.04          | 1.00 – 1.08 |
| General trust: Experts                 | 1.30 ***      | 1.24 – 1.36 |
| General trust: Govt                    | 1.05          | 0.99 – 1.11 |
| COVID trust: Politicians               | 1.05          | 0.99 – 1.13 |
| COVID Trust: National sci/med advisors | 1.19 ***      | 1.13 – 1.26 |
| COVID Trust: Independent scientists    | 0.94 *        | 0.90 – 0.99 |
| COVID Trust: WHO                       | 1.23 ***      | 1.17 – 1.29 |
| Personal efficacy                      | 1.00          | 0.96 – 1.05 |
| Govt efficacy                          | 1.00          | 0.94 – 1.06 |
| Perceived infection risk               | 1.16 ***      | 1.11 – 1.20 |
| Worry about COVID                      | 1.44 ***      | 1.38 – 1.50 |
| Days since first case                  | 0.93          | 0.70 – 1.22 |
| Total confirmed cases                  | 1.02          | 0.83 – 1.26 |
| <b>Random Effects</b>                  |               |             |
| $\sigma^2$                             | 3.29          |             |
| $\tau_{00}$ month:country              | 0.09          |             |
| $\tau_{00}$ country                    | 0.04          |             |
| Intraclass correlation coefficient     | 0.04          |             |
| $N_{\text{month}}$                     | 6             |             |
| $N_{\text{country}}$                   | 10            |             |
| Observations                           | 19216         |             |
| Marginal $R^2$ / Conditional $R^2$     | 0.184 / 0.216 |             |

Odds ratios [95CI] based on standardized (scaled and mean centered) continuous variables, except for gender which is unstandardized. \* $p < .05$ , \*\*\* $p < .001$ .

Table S8

Result of logistic regression models predicting vaccine acceptance, including or excluding general vaccine attitudes.

|                                        | Base model                     |                                |                                | Including general vaccine attitudes |                                |                                |
|----------------------------------------|--------------------------------|--------------------------------|--------------------------------|-------------------------------------|--------------------------------|--------------------------------|
|                                        | UK Prolific (Sep)<br><i>OR</i> | UK Respondi (Sep)<br><i>OR</i> | UK Respondi (Oct)<br><i>OR</i> | UK Prolific (Sep)<br><i>OR</i>      | UK Respondi (Sep)<br><i>OR</i> | UK Respondi (Oct)<br><i>OR</i> |
| (Intercept)                            | 4.14 ***<br>[3.47 – 4.98]      | 5.56 ***<br>[4.57 – 6.81]      | 4.91 ***<br>[4.05 – 6.00]      | 4.28 ***<br>[3.57 – 5.17]           | 6.17 ***<br>[5.02 – 7.67]      | 5.40 ***<br>[4.39 – 6.69]      |
| Age                                    | 1.12<br>[0.99 – 1.27]          | 1.39 ***<br>[1.21 – 1.59]      | 1.37 ***<br>[1.20 – 1.58]      | 1.15 *<br>[1.01 – 1.31]             | 1.32 ***<br>[1.15 – 1.52]      | 1.25 **<br>[1.08 – 1.45]       |
| Gender (Female)                        | 0.62 ***<br>[0.49 – 0.79]      | 0.50 ***<br>[0.38 – 0.64]      | 0.44 ***<br>[0.34 – 0.57]      | 0.63 ***<br>[0.49 – 0.80]           | 0.49 ***<br>[0.37 – 0.64]      | 0.43 ***<br>[0.33 – 0.57]      |
| Education                              | 1.02<br>[0.91 – 1.15]          | 1.11<br>[0.98 – 1.27]          | 1.18 *<br>[1.04 – 1.34]        | 1.00<br>[0.88 – 1.13]               | 1.08<br>[0.94 – 1.23]          | 1.14<br>[1.00 – 1.31]          |
| Numeracy                               | 1.12<br>[0.99 – 1.26]          | 1.00<br>[0.88 – 1.14]          | 1.00<br>[0.88 – 1.13]          | 1.06<br>[0.93 – 1.20]               | 0.93<br>[0.82 – 1.07]          | 0.87 *<br>[0.76 – 0.99]        |
| Politics (Conservative)                | 0.85 *<br>[0.74 – 0.97]        | 0.88<br>[0.77 – 1.01]          | 0.86 *<br>[0.75 – 0.99]        | 0.85 *<br>[0.74 – 0.98]             | 0.87<br>[0.75 – 1.01]          | 0.85 *<br>[0.73 – 0.98]        |
| Prosociality                           | 1.11<br>[0.98 – 1.26]          | 1.09<br>[0.96 – 1.25]          | 1.07<br>[0.94 – 1.23]          | 1.10<br>[0.96 – 1.25]               | 1.08<br>[0.94 – 1.24]          | 1.04<br>[0.90 – 1.20]          |
| General social trust                   | 1.03<br>[0.91 – 1.17]          | 1.09<br>[0.96 – 1.25]          | 0.97<br>[0.85 – 1.11]          | 1.03<br>[0.91 – 1.17]               | 1.04<br>[0.90 – 1.20]          | 0.96<br>[0.83 – 1.11]          |
| General trust: Experts                 | 1.39 ***<br>[1.20 – 1.60]      | 1.23 **<br>[1.06 – 1.44]       | 1.45 ***<br>[1.24 – 1.70]      | 1.28 **<br>[1.11 – 1.49]            | 1.11<br>[0.95 – 1.31]          | 1.29 **<br>[1.09 – 1.53]       |
| General trust: Govt                    | 1.27 **<br>[1.08 – 1.51]       | 1.14<br>[0.95 – 1.37]          | 1.03<br>[0.86 – 1.22]          | 1.24 *<br>[1.05 – 1.48]             | 1.16<br>[0.96 – 1.40]          | 0.99<br>[0.82 – 1.19]          |
| COVID trust: Politicians               | 0.93<br>[0.76 – 1.14]          | 1.11<br>[0.88 – 1.39]          | 1.26 *<br>[1.01 – 1.56]        | 0.95<br>[0.77 – 1.17]               | 1.17<br>[0.92 – 1.48]          | 1.35 *<br>[1.07 – 1.70]        |
| COVID Trust: National sci/med advisors | 1.14<br>[0.97 – 1.34]          | 1.25 *<br>[1.04 – 1.50]        | 1.29 **<br>[1.07 – 1.56]       | 1.12<br>[0.94 – 1.32]               | 1.14<br>[0.94 – 1.38]          | 1.20<br>[0.98 – 1.47]          |
| COVID Trust: Independent scientists    | 0.93<br>[0.80 – 1.07]          | 0.88<br>[0.74 – 1.04]          | 1.00<br>[0.85 – 1.17]          | 0.95<br>[0.82 – 1.11]               | 0.90<br>[0.75 – 1.07]          | 0.95<br>[0.80 – 1.13]          |
| COVID Trust: WHO                       | 1.45 ***<br>[1.25 – 1.68]      | 1.32 **<br>[1.11 – 1.57]       | 1.04<br>[0.87 – 1.24]          | 1.41 ***<br>[1.21 – 1.64]           | 1.33 **<br>[1.11 – 1.59]       | 1.03<br>[0.85 – 1.25]          |
| Personal efficacy                      | 1.10<br>[0.96 – 1.25]          | 1.03<br>[0.89 – 1.18]          | 1.03<br>[0.89 – 1.18]          | 1.06<br>[0.93 – 1.22]               | 1.00<br>[0.86 – 1.16]          | 0.98<br>[0.84 – 1.14]          |
| Govt efficacy                          | 1.00<br>[0.84 – 1.20]          | 0.95<br>[0.77 – 1.17]          | 1.04<br>[0.86 – 1.27]          | 1.01<br>[0.84 – 1.22]               | 0.95<br>[0.77 – 1.18]          | 1.08<br>[0.88 – 1.33]          |
| Perceived infection risk               | 1.04<br>[0.90 – 1.18]          | 1.09<br>[0.94 – 1.26]          | 0.99<br>[0.86 – 1.13]          | 1.02<br>[0.88 – 1.17]               | 1.12<br>[0.96 – 1.31]          | 0.97<br>[0.83 – 1.12]          |
| Worry about COVID                      | 1.37 ***<br>[1.19 – 1.57]      | 1.56 ***<br>[1.36 – 1.80]      | 1.43 ***<br>[1.23 – 1.65]      | 1.36 ***<br>[1.18 – 1.57]           | 1.47 ***<br>[1.26 – 1.70]      | 1.39 ***<br>[1.19 – 1.63]      |
| General vaccine attitudes              |                                |                                |                                | 1.69 ***<br>[1.51 – 1.89]           | 2.08 ***<br>[1.84 – 2.37]      | 2.32 ***<br>[2.02 – 2.66]      |
| Observations                           | 1845                           | 1772                           | 1702                           | 1839                                | 1767                           | 1698                           |
| R <sup>2</sup> Tjur                    | 0.192                          | 0.174                          | 0.192                          | 0.235                               | 0.247                          | 0.281                          |

Odds ratios [95CI] based on standardized (scaled and mean centered) continuous variables except for gender which is unstandardized.

\*p &lt; .05, \*\*p &lt; .01, \*\*\* p &lt; .001



**STROBE 2007 (v4) checklist of items to be included in reports of observational studies in epidemiology\***  
**Checklist for cohort, case-control, and cross-sectional studies (combined)**

| Section/Topic             | Item # | Recommendation                                                                                                                                                                                                                                                                                                                                                                                                                                                         | Reported on page #      |
|---------------------------|--------|------------------------------------------------------------------------------------------------------------------------------------------------------------------------------------------------------------------------------------------------------------------------------------------------------------------------------------------------------------------------------------------------------------------------------------------------------------------------|-------------------------|
| Title and abstract        | 1      | (a) Indicate the study’s design with a commonly used term in the title or the abstract                                                                                                                                                                                                                                                                                                                                                                                 | 1                       |
|                           |        | (b) Provide in the abstract an informative and balanced summary of what was done and what was found                                                                                                                                                                                                                                                                                                                                                                    | 2                       |
| <b>Introduction</b>       |        |                                                                                                                                                                                                                                                                                                                                                                                                                                                                        |                         |
| Background/rationale      | 2      | Explain the scientific background and rationale for the investigation being reported                                                                                                                                                                                                                                                                                                                                                                                   | 4                       |
| Objectives                | 3      | State specific objectives, including any pre-specified hypotheses                                                                                                                                                                                                                                                                                                                                                                                                      | 6                       |
| <b>Methods</b>            |        |                                                                                                                                                                                                                                                                                                                                                                                                                                                                        |                         |
| Study design              | 4      | Present key elements of study design early in the paper                                                                                                                                                                                                                                                                                                                                                                                                                | 7                       |
| Setting                   | 5      | Describe the setting, locations, and relevant dates, including periods of recruitment, exposure, follow-up, and data collection                                                                                                                                                                                                                                                                                                                                        | 11                      |
| Participants              | 6      | (a) <i>Cohort study</i> —Give the eligibility criteria, and the sources and methods of selection of participants. Describe methods of follow-up<br><i>Case-control study</i> —Give the eligibility criteria, and the sources and methods of case ascertainment and control selection. Give the rationale for the choice of cases and controls<br><i>Cross-sectional study</i> —Give the eligibility criteria, and the sources and methods of selection of participants | 7                       |
|                           |        | (b) <i>Cohort study</i> —For matched studies, give matching criteria and number of exposed and unexposed<br><i>Case-control study</i> —For matched studies, give matching criteria and the number of controls per case                                                                                                                                                                                                                                                 | -                       |
| Variables                 | 7      | Clearly define all outcomes, exposures, predictors, potential confounders, and effect modifiers. Give diagnostic criteria, if applicable                                                                                                                                                                                                                                                                                                                               | 8, Table S1             |
| Data sources/ measurement | 8*     | For each variable of interest, give sources of data and details of methods of assessment (measurement). Describe comparability of assessment methods if there is more than one group                                                                                                                                                                                                                                                                                   | 7                       |
| Bias                      | 9      | Describe any efforts to address potential sources of bias                                                                                                                                                                                                                                                                                                                                                                                                              | 11                      |
| Study size                | 10     | Explain how the study size was arrived at                                                                                                                                                                                                                                                                                                                                                                                                                              | 7                       |
| Quantitative variables    | 11     | Explain how quantitative variables were handled in the analyses. If applicable, describe which groupings were chosen and why                                                                                                                                                                                                                                                                                                                                           | 8                       |
| Statistical methods       | 12     | (a) Describe all statistical methods, including those used to control for confounding                                                                                                                                                                                                                                                                                                                                                                                  | 11                      |
|                           |        | (b) Describe any methods used to examine subgroups and interactions                                                                                                                                                                                                                                                                                                                                                                                                    | 11                      |
|                           |        | (c) Explain how missing data were addressed                                                                                                                                                                                                                                                                                                                                                                                                                            | 10 (footnote), Table S3 |
|                           |        | (d) <i>Cohort study</i> —If applicable, explain how loss to follow-up was addressed                                                                                                                                                                                                                                                                                                                                                                                    | -                       |

|                          |     |                                                                                                                                                                                                                                                                                                                                                                                                               |                                                             |
|--------------------------|-----|---------------------------------------------------------------------------------------------------------------------------------------------------------------------------------------------------------------------------------------------------------------------------------------------------------------------------------------------------------------------------------------------------------------|-------------------------------------------------------------|
|                          |     | <i>Case-control study</i> —If applicable, explain how matching of cases and controls was addressed<br><i>Cross-sectional study</i> —If applicable, describe analytical methods taking account of sampling strategy<br>(e) Describe any sensitivity analyses                                                                                                                                                   | 12(footnote), Table S6                                      |
| <b>Results</b>           |     |                                                                                                                                                                                                                                                                                                                                                                                                               |                                                             |
| Participants             | 13* | (a) Report numbers of individuals at each stage of study—eg numbers potentially eligible, examined for eligibility, confirmed eligible, included in the study, completing follow-up, and analysed<br>(b) Give reasons for non-participation at each stage<br>(c) Consider use of a flow diagram                                                                                                               | 11 (Table 1), Tables S6,S7<br>7<br>-                        |
| Descriptive data         | 14* | (a) Give characteristics of study participants (eg demographic, clinical, social) and information on exposures and potential confounders<br>(b) Indicate number of participants with missing data for each variable of interest<br>(c) <i>Cohort study</i> —Summarise follow-up time (eg, average and total amount)                                                                                           | 11 (Table 1), Tables S4, S5<br>10 (footnote), Table S3<br>- |
| Outcome data             | 15* | <i>Cohort study</i> —Report numbers of outcome events or summary measures over time<br><i>Case-control study</i> —Report numbers in each exposure category, or summary measures of exposure<br><i>Cross-sectional study</i> —Report numbers of outcome events or summary measures                                                                                                                             | -<br>-<br>11                                                |
| Main results             | 16  | (a) Give unadjusted estimates and, if applicable, confounder-adjusted estimates and their precision (eg, 95% confidence interval). Make clear which confounders were adjusted for and why they were included<br>(b) Report category boundaries when continuous variables were categorized<br>(c) If relevant, consider translating estimates of relative risk into absolute risk for a meaningful time period | 12, Figure S1,<br>-<br>-                                    |
| Other analyses           | 17  | Report other analyses done—eg analyses of subgroups and interactions, and sensitivity analyses                                                                                                                                                                                                                                                                                                                |                                                             |
| <b>Discussion</b>        |     |                                                                                                                                                                                                                                                                                                                                                                                                               |                                                             |
| Key results              | 18  | Summarise key results with reference to study objectives                                                                                                                                                                                                                                                                                                                                                      | 14                                                          |
| Limitations              | 19  | Discuss limitations of the study, taking into account sources of potential bias or imprecision. Discuss both direction and magnitude of any potential bias                                                                                                                                                                                                                                                    | 16                                                          |
| Interpretation           | 20  | Give a cautious overall interpretation of results considering objectives, limitations, multiplicity of analyses, results from similar studies, and other relevant evidence                                                                                                                                                                                                                                    | 15                                                          |
| Generalisability         | 21  | Discuss the generalisability (external validity) of the study results                                                                                                                                                                                                                                                                                                                                         | 16                                                          |
| <b>Other information</b> |     |                                                                                                                                                                                                                                                                                                                                                                                                               |                                                             |
| Funding                  | 22  | Give the source of funding and the role of the funders for the present study and, if applicable, for the original study on which the present article is based                                                                                                                                                                                                                                                 | 20                                                          |



1  
2  
3  
4  
5  
6  
7  
8  
9  
10  
11  
12  
13  
14  
15  
16  
17  
18  
19  
20  
21  
22  
23  
24  
25  
26  
27  
28  
29  
30  
31  
32  
33  
34  
35  
36  
37  
38  
39  
40  
41  
42  
43  
44  
45  
46

\*Give information separately for cases and controls in case-control studies and, if applicable, for exposed and unexposed groups in cohort and cross-sectional studies.  
**Note:** An Explanation and Elaboration article discusses each checklist item and gives methodological background and published examples of transparent reporting. The STROBE checklist is best used in conjunction with this article (freely available on the Web sites of PLoS Medicine at <http://www.plosmedicine.org/>, Annals of Internal Medicine at <http://www.annals.org/>, and Epidemiology at <http://www.epidem.com/>). Information on the STROBE Initiative is available at [www.strobe-statement.org](http://www.strobe-statement.org).

For peer review only

# BMJ Open

## Correlates of intended COVID-19 vaccine acceptance across time and countries: Results from a series of cross-sectional surveys

|                                 |                                                                                                                                                                                                                                                                                                                                                                                                                                                                                                                                                                                                                                                                                                                                                                                                                                                                                                                                                                            |
|---------------------------------|----------------------------------------------------------------------------------------------------------------------------------------------------------------------------------------------------------------------------------------------------------------------------------------------------------------------------------------------------------------------------------------------------------------------------------------------------------------------------------------------------------------------------------------------------------------------------------------------------------------------------------------------------------------------------------------------------------------------------------------------------------------------------------------------------------------------------------------------------------------------------------------------------------------------------------------------------------------------------|
| Journal:                        | <i>BMJ Open</i>                                                                                                                                                                                                                                                                                                                                                                                                                                                                                                                                                                                                                                                                                                                                                                                                                                                                                                                                                            |
| Manuscript ID                   | bmjopen-2020-048025.R2                                                                                                                                                                                                                                                                                                                                                                                                                                                                                                                                                                                                                                                                                                                                                                                                                                                                                                                                                     |
| Article Type:                   | Original research                                                                                                                                                                                                                                                                                                                                                                                                                                                                                                                                                                                                                                                                                                                                                                                                                                                                                                                                                          |
| Date Submitted by the Author:   | 30-Jun-2021                                                                                                                                                                                                                                                                                                                                                                                                                                                                                                                                                                                                                                                                                                                                                                                                                                                                                                                                                                |
| Complete List of Authors:       | Kerr, John; University of Cambridge, Winton Centre for Risk and Evidence Communication; University of Cambridge, Department of Psychology<br>Schneider, Claudia; University of Cambridge, Winton Centre for Risk & Evidence Communication; University of Cambridge, Department of Psychology<br>Recchia, Gabriel; University of Cambridge, Winton Centre for Risk & Evidence Communication<br>Dryhurst, Sarah; University of Cambridge, Winton Centre for Risk & Evidence Communication<br>Sahlin, Ullrika; Lund University, Center of Environmental and Climate Sciences<br>Dufouil, Carole; University of Bordeaux, Bordeaux Population Health Research Center, U1219, Inserm; Centre Hospitalier Universitaire de Bordeaux, Pole de sante publique<br>Arwidson, Pierre; Santé publique France<br>Freeman, Alexandra; Cambridge University, Winton Centre for Risk & Evidence Communication<br>van der Linden, Sander; University of Cambridge, Department of Psychology |
| <b>Primary Subject Heading</b>: | Public health                                                                                                                                                                                                                                                                                                                                                                                                                                                                                                                                                                                                                                                                                                                                                                                                                                                                                                                                                              |
| Secondary Subject Heading:      | Infectious diseases, Public health                                                                                                                                                                                                                                                                                                                                                                                                                                                                                                                                                                                                                                                                                                                                                                                                                                                                                                                                         |
| Keywords:                       | COVID-19, Public health < INFECTIOUS DISEASES, PREVENTIVE MEDICINE                                                                                                                                                                                                                                                                                                                                                                                                                                                                                                                                                                                                                                                                                                                                                                                                                                                                                                         |
|                                 |                                                                                                                                                                                                                                                                                                                                                                                                                                                                                                                                                                                                                                                                                                                                                                                                                                                                                                                                                                            |

SCHOLARONE™  
Manuscripts



I, the Submitting Author has the right to grant and does grant on behalf of all authors of the Work (as defined in the below author licence), an exclusive licence and/or a non-exclusive licence for contributions from authors who are: i) UK Crown employees; ii) where BMJ has agreed a CC-BY licence shall apply, and/or iii) in accordance with the terms applicable for US Federal Government officers or employees acting as part of their official duties; on a worldwide, perpetual, irrevocable, royalty-free basis to BMJ Publishing Group Ltd ("BMJ") its licensees and where the relevant Journal is co-owned by BMJ to the co-owners of the Journal, to publish the Work in this journal and any other BMJ products and to exploit all rights, as set out in our [licence](#).

The Submitting Author accepts and understands that any supply made under these terms is made by BMJ to the Submitting Author unless you are acting as an employee on behalf of your employer or a postgraduate student of an affiliated institution which is paying any applicable article publishing charge ("APC") for Open Access articles. Where the Submitting Author wishes to make the Work available on an Open Access basis (and intends to pay the relevant APC), the terms of reuse of such Open Access shall be governed by a Creative Commons licence – details of these licences and which [Creative Commons](#) licence will apply to this Work are set out in our licence referred to above.

Other than as permitted in any relevant BMJ Author's Self Archiving Policies, I confirm this Work has not been accepted for publication elsewhere, is not being considered for publication elsewhere and does not duplicate material already published. I confirm all authors consent to publication of this Work and authorise the granting of this licence.

1  
2  
3  
4  
5  
6  
7  
8  
9  
10  
11  
12  
13  
14  
15  
16  
17  
18  
19  
20  
21  
22  
23  
24  
25  
26  
27  
28  
29  
30  
31  
32  
33  
34  
35  
36  
37  
38  
39  
40  
41  
42  
43  
44  
45  
46  
47  
48  
49  
50  
51  
52  
53  
54  
55  
56  
57  
58  
59  
60

1  
2  
3  
4

## **Correlates of intended COVID-19 vaccine acceptance across time and countries: Results from a series of cross-sectional surveys**

5 John R. Kerr\*<sup>1,2</sup>, Claudia R. Schneider<sup>1,2</sup>, Gabriel Recchia<sup>2</sup>, Sarah Dryhurst<sup>2</sup>, Ullrika  
6 Sahlin<sup>3</sup>, Carole Dufouil<sup>4,5</sup>, Pierre Arwidson<sup>6</sup>, Alexandra L. J. Freeman<sup>2</sup>, and Sander van der  
7 Linden<sup>1,2</sup>

8  
9 \*Corresponding author: [jk802@cam.ac.uk](mailto:jk802@cam.ac.uk); +44 7305481785

10 <sup>1</sup> Department of Psychology, School of Biological Sciences, University of Cambridge,  
11 Downing Street, CB2 3EB Cambridge, UK.

12 <sup>2</sup> Winton Centre for Risk and Evidence Communication, University of Cambridge,  
13 Wilberforce Road, CB3 0WA Cambridge, UK.

14 <sup>3</sup> Center of Environmental and Climate Sciences, Lund University, Lund, Sweden

15 <sup>4</sup> Univ. Bordeaux, Inserm, Bordeaux Population Health Research Center, UMR 1219, Inserm,  
16 Bordeaux, France

17 <sup>5</sup> Pole de sante publique Centre Hospitalier Universitaire (CHU) de Bordeaux,  
18 Bordeaux, France.

19 <sup>6</sup> Santé publique France, Saint-Maurice, France

20  
21 Word count: 4,887  
22

**ABSTRACT**

1  
2  
3  
4  
5  
6  
7  
8  
9  
10  
11  
12  
13  
14  
15  
16  
17  
18  
19  
20  
21  
22  
23  
24  
25  
26  
27  
28  
29  
30  
31  
32  
33  
34  
35  
36  
37  
38  
39  
40  
41  
42  
43  
44  
45  
46  
47  
48  
49  
50  
51  
52  
53  
54  
55  
56  
57  
58  
59  
60

1 Objective: Describe demographic, social, and psychological correlates of willingness to receive  
2 a COVID-19 vaccine.

3  
4  
5  
6  
7  
8  
9  
10  
11  
12  
13  
14  
15  
16  
17  
18  
19  
20  
21  
22  
23  
24  
25  
26  
27  
28  
29  
30  
31  
32  
33  
34  
35  
36  
37  
38  
39  
40  
41  
42  
43  
44  
45  
46  
47  
48  
49  
50  
51  
52  
53  
54  
55  
56  
57  
58  
59  
60

6 Setting: Series of online surveys undertaken between March and October 2020.

7  
8  
9  
10  
11  
12  
13  
14  
15  
16  
17  
18  
19  
20  
21  
22  
23  
24  
25  
26  
27  
28  
29  
30  
31  
32  
33  
34  
35  
36  
37  
38  
39  
40  
41  
42  
43  
44  
45  
46  
47  
48  
49  
50  
51  
52  
53  
54  
55  
56  
57  
58  
59  
60

7 Participants: A total of 25 separate national samples (matched to country population by age  
8 and sex) in 12 different countries were recruited through online panel providers ( $N = 25,334$ ).

9  
10  
11  
12  
13  
14  
15  
16  
17  
18  
19  
20  
21  
22  
23  
24  
25  
26  
27  
28  
29  
30  
31  
32  
33  
34  
35  
36  
37  
38  
39  
40  
41  
42  
43  
44  
45  
46  
47  
48  
49  
50  
51  
52  
53  
54  
55  
56  
57  
58  
59  
60

9 Primary outcome measures: Reported willingness to receive a COVID-19 vaccination.

10  
11  
12  
13  
14  
15  
16  
17  
18  
19  
20  
21  
22  
23  
24  
25  
26  
27  
28  
29  
30  
31  
32  
33  
34  
35  
36  
37  
38  
39  
40  
41  
42  
43  
44  
45  
46  
47  
48  
49  
50  
51  
52  
53  
54  
55  
56  
57  
58  
59  
60

10 Results: Reported willingness to receive a vaccine varied widely across samples, ranging from  
11 63% to 88%. Multivariate logistic regression analyses reveal sex (female OR = 0.59, 95%CI  
12 [0.55, 0.64]), trust in medical and scientific experts (OR = 1.27, [1.22, 1.33]), and worry about  
13 the COVID-19 virus (OR = 1.49, [1.43, 1.55]) as the strongest correlates of stated vaccine  
14 acceptance considering pooled data, and the most consistent correlates across countries. In a  
15 subset of UK samples we show that these effects are robust after controlling for attitudes  
16 towards vaccination in general.

17  
18  
19  
20  
21  
22  
23  
24  
25  
26  
27  
28  
29  
30  
31  
32  
33  
34  
35  
36  
37  
38  
39  
40  
41  
42  
43  
44  
45  
46  
47  
48  
49  
50  
51  
52  
53  
54  
55  
56  
57  
58  
59  
60

17 Conclusions: Our results indicate that the burden of trust largely rests on the shoulders of the  
18 scientific and medical community, with implications for how future COVID-19 vaccination  
19 information should be communicated to maximize uptake.

20  
21  
22  
23  
24  
25  
26  
27  
28  
29  
30  
31  
32  
33  
34  
35  
36  
37  
38  
39  
40  
41  
42  
43  
44  
45  
46  
47  
48  
49  
50  
51  
52  
53  
54  
55  
56  
57  
58  
59  
60

21 Keywords: Vaccination, vaccine hesitancy, COVID-19, risk, trust.

## 1 ARTICLE SUMMARY

### 2 Strengths and limitations of this study

- 3 • To examine predictors of vaccine acceptance we collected data from a large number of  
4 participants in several different countries and at different time points.
- 5 • We examine a range of demographic, risk and trust-related predictors using multivariate  
6 models.
- 7 • Samples were quota matched (age and gender) to country population, but not  
8 probability sampled.
- 9 • At the time of the surveys no COVID-19 vaccine was publicly available, thus stated  
10 acceptance is hypothetical, and may change with provision of more information about  
11 current vaccines.

## 1 INTRODUCTION

2 COVID-19 has resulted in over 2.5 million deaths globally, illness for millions more,  
3 and unprecedented social and economic disruption[1,2]. Many governments have signaled  
4 that mass vaccination against the virus is the most straightforward—and possibly only—route  
5 to normality and stability[3,4]. While recent announcements of effective vaccines[5,6] and  
6 their rollout to certain demographics in some countries is promising[7], the wider impact of  
7 vaccines on preventing the spread of disease is dependent on broad uptake within a given  
8 population. In order to achieve ‘herd immunity’, enough people in a population must be  
9 immune to prevent the spread of a disease among non-immune individuals. The proportion  
10 varies depending on a number of factors including how infectious the contagion is, its  
11 prevalence in a population, and the variation in individual susceptibility or exposure to  
12 infection[8]. Estimates for the level of immunity required for COVID-19 herd immunity have  
13 ranged from 50% to 80% of the population, acquired through either natural infection and  
14 recovery, or through vaccination[9,10]. It must be noted that, while there is evidence that  
15 currently available vaccines can reduce SARS-CoV-2 infections [11], there is only limited  
16 preliminary evidence that vaccination can reduce transmission of the virus at the time of  
17 writing [12]. Thus, the net impact of vaccination campaigns on the spread of the virus  
18 remains uncertain until more research is conducted [13].

19 Vaccine hesitancy—defined as a delay in acceptance or refusal of vaccines despite  
20 availability[14]—poses a challenge to achieving herd immunity. If a sufficient number of  
21 people in a population reject vaccination—and herd immunity is not achieved—the virus will  
22 continue to circulate among susceptible individuals, including those who are unable to be  
23 vaccinated for medical reasons. The WHO identified vaccine hesitancy as one of the top 10  
24 threats to global health in 2019[15], and in the pressing context of COVID-19, understanding  
25 vaccine hesitancy has only grown in importance[16].



1  
2  
3 1 Public health researchers concerned with uptake of vaccination have understandably  
4  
5 2 sought to uncover the drivers of vaccine hesitancy. By identifying antecedents of vaccine  
6  
7 3 hesitancy, policy makers, public health officials, and professional communicators can target  
8  
9 4 interventions to increase uptake of vaccines and ultimately reduce the burden of disease in a  
10  
11 5 population[4]. However, strategies developed for campaigns targeting diseases with well-  
12  
13 6 established vaccines (e.g. MMR, pertussis) may not fully translate to a pandemic context  
14  
15 7 where there is greater uncertainty, less information available, and where institutional trust  
16  
17 8 plays a greater role—as was noted in the wake of the 2009 H1N1 influenza pandemic[17].  
18  
19  
20  
21

22 9 Recent evidence shows that acceptance of a COVID-19 vaccine is far from universal  
23  
24 10 in many countries. Lazarus et al[18] conducted a series of surveys across 19 countries in June  
25  
26 11 2020, asking respondents how much they agreed with the following statement: ‘If a COVID-  
27  
28 12 19 vaccine is proven safe and effective and is available, I will take it’. The proportion of  
29  
30 13 respondents who agreed ranged from 88.6% (China) to 55.8% (Russia). Examining possible  
31  
32 14 predictors of vaccine acceptance, the authors report that men, older people, and those who  
33  
34 15 express greater trust in the government were more likely to express willingness to receive a  
35  
36 16 vaccine. The role of trust (in science, the government or the medical system) is a recurring  
37  
38 17 theme in many other recent studies which have examined COVID-19 vaccine hesitancy in  
39  
40 18 individual countries[19–27]. For example, Palamenghi et al[24] report that across two large  
41  
42 19 random samples of the Italian population, trust in science was positively correlated ( $r = .37$ )  
43  
44 20 with willingness to receive a COVID-19 vaccine. Frank and Arim[20] report that Canadians  
45  
46 21 who are more trusting of local and national government bodies are more likely to express  
47  
48 22 intentions to receive a vaccine if available, as are those who report high general social trust  
49  
50 23 (i.e. believing that ‘most people can be trusted’).  
51  
52  
53  
54  
55  
56

57 24 Such results align with pre-COVID studies which have highlighted the role of trust in  
58  
59 25 vaccination intentions and attitudes[17,28,29]. However, we note that recent studies  
60

1  
2  
3 1 examining COVID-19 vaccine intentions have typically only examined trust in one entity  
4  
5 2 (e.g. government or hospitals); research to date has not considered the possible overlap  
6  
7 3 between trust in the government, trust in science and medicine, and general social trust[30–  
8  
9 4 32]. There is also a question over the extent to which vaccine acceptance is linked to mistrust  
10  
11 5 in experts and authorities *regarding COVID-19 in particular*, or a more general lack of trust  
12  
13 6 in these actors. In order to target communications specifically designed to satisfy the  
14  
15 7 information needs of those who distrust official authorities, it is important to identify the  
16  
17 8 precise agents that they distrust (and, ideally, why).  
18  
19  
20  
21

22 9       Beyond trust, the perceived threat or risk posed by a given disease has also been  
23  
24 10 shown to predict vaccination attitudes. Models of health behavior, such as the Health Belief  
25  
26 11 Model[33] and Protection Motivation Theory[34], place the perceived risk or severity of a  
27  
28 12 disease as a key driver of vaccination intentions (and other preventative health  
29  
30 13 behaviors)[17,35]. Recent surveys in the US, Malaysia, and Israel have shown that perceived  
31  
32 14 risk and worry regarding the COVID-19 virus is associated with vaccine acceptance[36–38].  
33  
34 15 Other factors, such as the perceived benefits and costs as well as efficacy of protective  
35  
36 16 behaviors are also outlined in models of health behavior as predictors of engagement in a  
37  
38 17 given health behavior. However, until recently, little information about the possible costs,  
39  
40 18 distribution and efficacy of a COVID-19 vaccine was available, meaning that the public has  
41  
42 19 not generally been able to assess the potential benefits of a vaccine outside of a purely  
43  
44 20 hypothetical arena (although experimental work has examined the influence of these factors  
45  
46 21 on willingness to receive a vaccine[39]).  
47  
48  
49  
50  
51

52 22       There are also increasing concerns about the politicization of science and about  
53  
54 23 politics becoming entangled with vaccine beliefs and attitudes specifically, particularly in the  
55  
56 24 context of a pandemic where central government structures are deeply involved in all stages  
57  
58 25 of the public health response[17,40]. Prior research[41] has shown that the rhetoric adopted  
59  
60

1 by political elites on social media can fuel anti-vaccination attitudes amongst their followers  
2 and that ideologies can help explain anti-vaccination attitudes[37,42].

3 In the current study we present a more comprehensive international analysis of the  
4 role of key social, political, and psychological correlates of COVID-19 vaccine acceptance  
5 across 12 countries, with multiple national surveys in some countries (total  $N = 25,334$ , see  
6 Table 1). All samples were recruited via online panel providers using quotas to ensure  
7 samples were matched to the general population in terms of age and gender (with the  
8 exception of France, see methods). Unlike previous studies, we examine reported trust in a  
9 range of actors, both in general and specifically relating to the COVID-19 pandemic. We also  
10 include several demographic factors (including political orientation), numeracy (known to  
11 play a role in risk perceptions[43], and vaccine attitudes in particular[44]), affective (worry)  
12 and cognitive (perceived likelihood of infection) aspects of perceived COVID-19 risk[45],  
13 broad measures of perceived efficacy, and, in a subset of samples, general attitudes towards  
14 vaccines.

## 15 **METHODS**

### 16 **Participants and procedure**

17 Between March and October 2020, we fielded 25 separate surveys across 12  
18 countries. The majority of samples were recruited through an ISO certified international  
19 survey company Respondi (respondi.com). Our initial US and UK samples were recruited via  
20 Prolific (prolific.ac). Although some later samples from these countries were recruited via  
21 Respondi, we continued to also recruit Prolific samples to allow comparisons with our  
22 earliest data points in the pandemic. As we did not have matching Prolific and Respondi  
23 samples at each time point, and results differed slightly between these providers, we report  
24 these samples separately for transparency. Recruitment was managed by these external  
25 providers and exact response rates were not provided. However, Respondi provided a broad

1  
2  
3 1 estimate of a 30% response rate across surveys (personal communication; ResponDi, 2021).  
4  
5 2 Non-response bias was mitigated by quota-based sampling, which ensured all samples were  
6  
7 3 representative of each country's population in terms of age and gender (using interlocking  
8  
9 4 quotas based on national census data), and, in Prolific samples, ethnicity [46]. We also  
10  
11 5 control for socio-demographic factors such as education level and political orientation in  
12  
13 6 analyses below. Participants who had previously completed a survey were prevented from  
14  
15 7 completing further surveys, so all our samples represent different individuals. Participants  
16  
17 8 who did not finish the survey were excluded. Demographic details for each sample are shown  
18  
19 9 in Table 1. For completeness we include several samples in which vaccine acceptance was  
20  
21 10 measured but the survey did not include all the independent variables used in the models  
22  
23 11 presented below. Surveys which did not include all these variables are marked with a '\*' in  
24  
25 12 Table 1.

31 13 All participants were directed via a study link to the Qualtrics platform, and provided  
32  
33 14 informed consent before completing the survey. This study was approved by the University  
34  
35 15 of Cambridge Psychology Research Ethics Committee (PRE.2020.034).

39 16 It is important to note that the surveys were conducted at various timepoints as the  
40  
41 17 pandemic unfolded in each country. Table 1 also reports the total number of COVID-19  
42  
43 18 deaths for each country at each survey timepoint, and the number of reported cases in the  
44  
45 19 week prior to the survey (with the caveat that reporting practices vary between countries). We  
46  
47 20 also provide the Stringency Index measure generated by the COVID-19 Government  
48  
49 21 Response Tracker [47], which is a 0-100 index based on various restrictions put in place by  
50  
51 22 governments to control the pandemic (e.g. closing schools, 'shelter in place' requirements).  
52  
53 23 External data were sourced from the COVID-19 Government Response Tracker [47] and Ali  
54  
55 24 et al. [48].

1 The information about potential vaccines also changed over the data collection period.  
2  
3  
4  
5 1 In February 2020, the first major vaccine candidates, the Moderna and Oxford AstraZeneca  
6  
7  
8 2 vaccines, were announced [49,50]. In mid-2020 the launches of Phase III trials for several  
9  
10  
11 3 vaccines were announced: Moderna and Pfizer BioNTech in July [51], and AstraZeneca in  
12  
13  
14 4 August [52]. Results of Phase III clinical trials and estimates of efficacy were not announced  
15  
16  
17 5 during the data collection period (ending in October, 2020). No vaccines were approved for  
18  
19  
20 6 use by local regulators at the time(s) the surveys were conducted in each country.

## 8 **Materials**

9 Participants reported their age and gender, level of education (ranging from *No formal*  
10  
11  
12 10 *education above age 16 to PhD*), and political orientation (*Very liberal/left wing to Very*  
13  
14  
15 11 *conservative/right wing*). Numeracy was measured as a combined index of the 2-3 item  
16  
17  
18 12 adaptive form of the Berlin Numeracy Test [53] and an additional risk literacy item from  
19  
20  
21 13 Lipkus et al.[54].

14 Participants completed a widely used measure of general social trust (*Generally*  
15  
16  
17 14 *speaking, would you say most people can be trusted, or that you can't be too careful in*  
18  
19  
20 15 *dealing with people?*)[55] and a separate measure of prosociality (*To what extent do you think*  
21  
22  
23 16 *it's important to do things for the benefit of others and society even if they have some costs to*  
24  
25  
26 17 *you personally?*). Trust in experts and trust in government were each measured as the  
27  
28  
29 18 combined average of reported trust in three targets (experts: scientists, medical doctors and  
30  
31  
32 19 nurses, and scientific knowledge [Cronbach's  $\alpha$  .77-.86]; government: politicians, current  
33  
34  
35 20 government, civil servants [ $\alpha$  .73-.90]; all from *Cannot be trusted at all to Can be trusted a*  
36  
37  
38 21 *lot*). We also asked participants to report their trust in several actors with specific regard to  
39  
40  
41 22 the COVID-19 pandemic. Participants reported the extent to which they trust politicians in  
42  
43  
44 23 their country to 'deal effectively with the pandemic', and how much they separately trusted  
45  
46  
47 24 the country's national scientific and medical advisors, independent experts not connected  
48  
49  
50 25

1  
2  
3 1 with government, and the WHO to ‘know the best measures to take in the face of the  
4  
5 2 pandemic’ (all from *Not at all* to *Very much*). Personal and government efficacy were  
6  
7 3 captured by items asking participants the extent to which they felt that, respectively, their  
8  
9 4 own actions, and the actions of their country ‘to limit the spread of coronavirus can make a  
10  
11 5 difference’ (*Not at all* to *Very much*). Perceived likelihood of infection was measured as an  
12  
13 6 index of three related items (example: *I will probably get sick with the coronavirus/COVID-*  
14  
15 7 *19*;  $\alpha$  .71-.89). Participants also reported their level of worry about the virus (from *Not at all*  
16  
17 8 *worried* to *Very worried*). In a subset of UK samples, we also asked participants about their  
18  
19 9 general attitude towards vaccination, using two items from Lewandowsky et al.’s [42] scale  
20  
21 10 (example: *I believe that vaccines are a safe and reliable way to help avert the spread of*  
22  
23 11 *preventable diseases* [ $r$ s .83-.87]).

24  
25  
26  
27  
28  
29 12 Participants’ vaccine acceptance was measured with the question: ‘*If a vaccine were*  
30  
31 13 *to be available for the coronavirus/COVID-19 now, would you get vaccinated yourself?*’  
32  
33 14 (*Yes/No*). Participants were also asked ‘*If a vaccine were to be available for the*  
34  
35 15 *coronavirus/COVID-19 now: Would you recommend vulnerable friends/family to get*  
36  
37 16 *vaccinated?*’ (*Yes/No*). Full item wording for all measures can be found in Table S1.

38  
39  
40  
41 17 Surveys were translated from English to other languages by native speakers fluent in  
42  
43 18 English.

## 44 45 46 47 19 **Analysis**

48  
49 20 To examine the correlates of vaccine acceptance we fitted a multivariate logistic  
50  
51 21 regression model to the data from each survey. To allow for descriptive comparisons between  
52  
53 22 countries and across time, we report model results separately for each country, time point,  
54  
55 23 and (in the UK) panel provider. We also report results from the model fitted to the pooled  
56  
57 24 data from all surveys, and a supplementary multi-level model adjusting for survey-level  
58  
59  
60

1 variables (total number of cases and days since first case in country at time of survey). All  
2 analyses were conducted in R (v4.0.5).

### 3 RESULTS

4 Figure 1 shows the percentage of participants in each survey who responded that they  
5 would be willing to be vaccinated if a COVID-19 vaccine was available, or would  
6 recommend a vaccine to vulnerable others, given the options of 'Yes' or 'No' <sup>1</sup>. Across all  
7 samples, the percentage of respondents who stated they were willing to receive a vaccine  
8 ranged from 62.6% (Sweden, April) to 88.1% (Mexico, March), while the percentage of those  
9 who said they would recommend a vaccine to vulnerable others ranged from 67.5% (US,  
10 September) to 91.7% (UK, March). Descriptively, in every single sample the proportion of  
11 respondents stating a willingness to receive a vaccine was lower than the proportion who  
12 would recommend it to vulnerable others ( $M_{diff} = -5.79\%$ ,  $SD = 3.00$ ). We also note a trend of  
13 decreasing stated acceptance over time: in nearly all countries with multiple samples, vaccine  
14 acceptance in any given survey was lower than previous surveys of the same population. For  
15 example between March and May, 2020, stated vaccine acceptance among respondents in  
16 Mexico dropped from 88.1% to 73.9% (a Chi-Square test of independence indicated that this  
17 difference was statistically significant,  $\chi^2 = 42.44$ ,  $p < .001$ ) In the US, stated vaccine  
18 acceptance (among participants recruited through online panel provider Respondi) fell more  
19 than 12 percentage points, from 74.7% to 62.6%, between May and September, 2020 ( $\chi^2 =$   
20  $25.89$ ,  $p < .001$ ).

---

<sup>1</sup> Based on respondents who answered the question. In the Italy sample a number of participants were not presented with these items due to a technical error ( $n = 80$ , 11%). In the remaining samples the average proportion of missing responses for vaccine intention and recommendation items was 1% (see supplementary Tables S2 and S3 for description of missing data and the age and gender distribution of those participants who answered the vaccine acceptance item). We acknowledge that in some cases estimates of vaccine acceptance may not be based on samples exactly matched to a country's population age and gender distribution due to this missing data, but note that age and gender are controlled for in the models below.



1  
2  
3  
4  
5  
6  
7  
8  
9  
10  
11  
12  
13  
14  
15  
16  
17  
18  
19  
20  
21  
22  
23  
24  
25  
26  
27  
28  
29  
30  
31  
32  
33  
34  
35  
36  
37  
38  
39  
40  
41  
42  
43  
44  
45  
46  
47  
48  
49  
50  
51  
52  
53  
54  
55  
56  
57  
58  
59  
60

1 [FIGURE 1 HERE]

For peer review only

1 Table 1.

2 Survey demographics, percentage of participants willing to receive a COVID-19 vaccine or to recommend it to vulnerable friends/family, and country-level  
 3 pandemic indicators.

| Country   | Source   | Date   | N    | M <sub>Age</sub> (SD) | Female (%) | Tertiary Educated (%) | Vaccine - acceptance (%) | Vaccine - Recommend (%) | Total deaths | Days since first case | Cases week prior | Stringency Index |
|-----------|----------|--------|------|-----------------------|------------|-----------------------|--------------------------|-------------------------|--------------|-----------------------|------------------|------------------|
| Australia | Dynata   | 20-Mar | 700  | 46.3 (16.4)           | 51.0       | 43.4                  | 82.9                     | 88.7                    | 7            | 55                    | 591              | 47.22            |
| China*    | Respondi | 09-Apr | 700  | 43.2 (14.3)           | 48.9       | 73.1                  | 85.8                     | 87.4                    | 3335         | 144                   | 276              | 56.94            |
| Germany   | Respondi | 23-Mar | 700  | 46.7 (15.9)           | 49.9       | 32.7                  | 80.8                     | 89.2                    | 123          | 56                    | 21784            | 76.85            |
| Spain     | Respondi | 22-Mar | 700  | 46.7 (15.0)           | 51.1       | 58.1                  | 83.6                     | 89.8                    | 1772         | 51                    | 20970            | 71.76            |
| Spain     | Respondi | 06-May | 700  | 46.0 (15.0)           | 50.4       | 57.0                  | 79.8                     | 82.5                    | 25857        | 96                    | 7408             | 81.94            |
| France    | BVA      | 03-Apr | 3002 | 48.8 (16.5)           | 52.5       | 71.1                  | 69.7                     | 80.7                    | 6496         | 98                    | 30979            | 87.96            |
| Italy     | Respondi | 22-Mar | 700  | 45.9 (14.8)           | 50.4       | 41.3                  | 85.3                     | 88.2                    | 5476         | 51                    | 34391            | 91.67            |
| Japan     | Respondi | 10-Apr | 699  | 48.1 (16.4)           | 50.9       | 53.3                  | 74.5                     | 80.1                    | 125          | 85                    | 3096             | 45.37            |
| S. Korea  | Respondi | 09-Apr | 700  | 45.3 (15.5)           | 49.0       | 70.5                  | 85.6                     | 88.4                    | 204          | 80                    | 447              | 82.41            |
| Mexico    | Respondi | 21-Mar | 693  | 38.7 (14.0)           | 50.5       | 66.4                  | 88.1                     | 90.3                    | 2            | 22                    | 210              | 8.33             |
| Mexico    | Respondi | 06-May | 700  | 38.6 (14.2)           | 51.0       | 75.8                  | 73.9                     | 75.6                    | 2704         | 68                    | 9835             | 82.41            |
| Sweden    | Respondi | 28-Mar | 700  | 45.5 (16.0)           | 49.1       | 40.3                  | 66.3                     | 77.2                    | 239          | 57                    | 1795             | 50.93            |
| Sweden    | Respondi | 17-Apr | 700  | 45.5 (16.5)           | 48.9       | 40.2                  | 63.4                     | 73.7                    | 1925         | 77                    | 3690             | 64.81            |
| UK        | Prolific | 19-Mar | 703  | 45.6 (15.7)           | 50.9       | 53.9                  | 80.4                     | 91.7                    | 162          | 48                    | 4719             | 31.48            |
| UK        | Prolific | 07-May | 1157 | 44.7 (15.7)           | 50.7       | 56.5                  | 80.4                     | 86.7                    | 30321        | 97                    | 25582            | 79.63            |
| UK        | Prolific | 06-Jul | 1325 | 44.5 (15.6)           | 52.5       | 58.5                  | 78.9                     | 85.3                    | 40643        | 157                   | 2461             | 64.35            |
| UK        | Prolific | 18-Sep | 1869 | 38.2 (15.0)           | 51.2       | 56.2                  | 73.0                     | 79.5                    | 41732        | 231                   | 24259            | 65.74            |
| UK        | Respondi | 07-May | 1150 | 45.7 (15.9)           | 52.0       | 43.4                  | 78.9                     | 84.2                    | 30321        | 97                    | 25582            | 79.63            |
| UK*       | Respondi | 08-Jun | 500  | 45.9 (15.9)           | 53.2       | 39.7                  | 79.0                     | 83.2                    | 38666        | 129                   | 7742             | 73.15            |
| UK        | Respondi | 06-Jul | 1326 | 45.4 (16.6)           | 51.7       | 44.9                  | 80.1                     | 84.4                    | 40643        | 157                   | 2461             | 64.35            |
| UK        | Respondi | 18-Sep | 1855 | 45.5 (16.1)           | 51.6       | 42.6                  | 75.7                     | 79.9                    | 41732        | 231                   | 24259            | 65.74            |
| UK        | Respondi | 29-Oct | 1744 | 46.7 (16.0)           | 52.2       | 42.0                  | 72.2                     | 76.1                    | 45955        | 272                   | 154873           | 75.00            |
| US        | Prolific | 19-Mar | 702  | 45.1 (15.8)           | 50.6       | 66.8                  | 75.7                     | 85.7                    | 264          | 58                    | 12077            | 67.13            |
| US        | Respondi | 07-May | 700  | 45.0 (16.1)           | 51.0       | 59.3                  | 74.7                     | 80.1                    | 78618        | 107                   | 187115           | 72.69            |
| US*       | Respondi | 28-Sep | 909  | 44.8 (15.6)           | 50.6       | 50.1                  | 62.6                     | 67.5                    | 205612       | 251                   | 288759           | 62.50            |

4 \*Indicates survey that included vaccine acceptance items but not all model predictor variables (excluded from analyses below).

1  
2  
3 1  
4  
5 2 We fitted a multivariate logistic regression model to data from each sample to identify  
6  
7 3 the correlates of COVID-19 vaccine intentions. Independent variables included: demographic  
8  
9 4 variables; an objective measure of numeracy, political ideology; general social trust;  
10  
11 5 prosociality (perceived importance of doing ‘things for the benefit of others and society’ even  
12  
13 6 at personal cost); general trust in medical and scientific experts; general trust in government;  
14  
15 7 specific trust in politicians to manage the pandemic; specific trust in (separately) national  
16  
17 8 science advisors, independent scientists and the WHO to ‘know the best measures to take in  
18  
19 9 the face of the pandemic’; the perceived efficacy of their own and their country’s actions to  
20  
21 10 limit the spread of the virus; perceived likelihood of infection; and, worry about COVID-19  
22  
23 11 (for details on measures see Methods section and Table S1; descriptive statistics are reported  
24  
25 12 in Table S4, and bivariate correlations in Figure S1). Continuous measures (i.e. all except  
26  
27 13 gender) were scaled and mean centered prior to analysis. Only complete observations were  
28  
29 14 included. Multicollinearity analyses indicated no issues arising from correlated predictors (all  
30  
31 15 variance inflation factor values < 4). To facilitate the interpretation of results we present odds  
32  
33 16 ratios in a heat map format in Figure 2. Full model results including confidence intervals can  
34  
35 17 be found in Table S5. Results of models investigating correlates of willingness to recommend  
36  
37 18 a vaccine to vulnerable others are also presented in supplementary materials (Figure S2,  
38  
39 19 Table S6). We fitted an additional multi-level model to the pooled data, adjusting for country,  
40  
41 20 month, days since first case, level of government intervention, total reported deaths, and  
42  
43 21 number of cases reported in each country at each time point (Table S7). Fixed effects were  
44  
45 22 essentially unchanged from those reported in the simpler pooled model. Due to the low  
46  
47 23 number of groups, estimates of random effects were unreliable [56].  
48  
49  
50  
51  
52  
53  
54  
55

56 24 [FIGURE 2 HERE]  
57  
58  
59  
60

1  
2  
3 1 Considering the most consistent correlates of stated vaccine acceptance across  
4  
5 2 samples, we find that in most samples individuals who report a higher level of general trust in  
6  
7 3 experts ( $OR_{pooled} = 1.28$ , 95%CI [1.22, 1.34]), or who are more worried about the virus  
8  
9 4 ( $OR_{pooled} = 1.47$  [1.41 – 1.53]), are more likely to say that they would accept a vaccine. In  
10  
11 5 Germany, Spain, Mexico, Sweden (March only), and nearly all UK samples, females are  
12  
13 6 generally less likely to say that they would accept a COVID-19 vaccine if available ( $OR_{pooled}$   
14  
15 7 = 0.59, [0.55, 0.64])<sup>2</sup>. We also note that measures of efficacy, both at the personal ( $OR_{pooled} =$   
16  
17 8 1.00, [0.96 – 1.05]) and country level ( $OR_{pooled} = 1.01$ , [0.96, 1.08]), were not significantly  
18  
19 9 associated with reported vaccine acceptance in most samples.  
20  
21  
22  
23  
24

25 10 Our results reveal a great deal of heterogeneity in the relevance of correlates across  
26  
27 11 countries, but also across time in countries where we conducted multiple surveys. For  
28  
29 12 example, in the United States only a few consistent associations emerged. Most notably,  
30  
31 13 political conservatism was associated with a lower likelihood to accept a COVID-19 vaccine  
32  
33 14 in March ( $OR_{USA-Mar} = 0.73$  [0.57, 0.93];  $OR_{USA-May} = 0.77$  [0.58 – 1.01]) whereas trust in  
34  
35 15 experts ( $OR_{USA-Mar} = 1.53$  [1.16, 2.03];  $OR_{USA-May} = 1.36$  [1.02 – 1.82]) and personal worry  
36  
37 16 about the virus ( $OR_{USA-Mar} = 1.47$  [1.17, 1.87];  $OR_{USA-May} = 1.27$ , [0.99 – 1.64]) were  
38  
39 17 associated with increased vaccination intentions. In contrast, in the United Kingdom,  
40  
41 18 additional factors such as the role of age, gender, and prosociality played a significant role.  
42  
43 19 There was also variation over time. For example, although political ideology was not a  
44  
45 20 significant correlate in the UK in May or July 2020, conservatism was associated with lower  
46  
47 21 vaccination intentions from September 2020 onwards (ORs 0.85-.88), which may be related  
48  
49 22 to increased polarization. To illustrate the increasing strength of the association between  
50  
51 23 political ideology and vaccine acceptance over time in the UK, in Figure 3 we plot the  
52  
53  
54  
55  
56  
57

---

58 <sup>2</sup> UK data was over represented in our pooled sample. As a robustness check we also fitted the model to the  
59 pooled sample with UK data removed and report that the effects of gender, trust in experts and worry remain  
60 significant ( $ps < .001$ ; see Table S5).

1 predicted likelihood of reported vaccine acceptance across the political spectrum (holding all  
2 other variables constant).

3 [FIGURE 3 HERE]

4  
5 In the UK, we also report a different pattern of effects when comparing between  
6 samples collected via different providers, even where these were collected on the same day  
7 (in May, July, and September), were matched on age and gender, and controlling for a range  
8 of other demographic variables. This underscores the caution that must be applied when  
9 studies generalize results from a single survey sample (particularly an online survey).

10 In terms of variance explained, the variables in our model explained approximately  
11 10-30% of the variance in the likelihood of vaccine acceptance vs refusal, with the exception  
12 of samples recruited in South Korea (4%) and Japan (8%).

#### 13 14 **Accounting for general vaccine attitudes**

15 To examine the extent to which the effects in our model can be accounted for by a  
16 negative perception of vaccines in general, we conducted an additional set of analyses. In our  
17 three most recent UK surveys we included a two-item measure of general vaccine attitudes  
18 (adapted from Lewandowsky et al.[42]). A comparison of results from models with or  
19 without general vaccine attitudes as an independent variable is shown as a heat map in Figure  
20 4. Although attitudes toward vaccination increase the explained variance of our model ( $\Delta R^2$   
21 4%-9%) and reveal strong significant effects such that more positive attitudes are associated  
22 with increased vaccination intentions (ORs 1.69-2.32; full results in Table S8), the  
23 relationships in the original model appear robust and are only minimally attenuated when  
24 accounting for generalized attitudes.

1 [FIGURE 4 HERE]

## 3 DISCUSSION

4 Understanding the psychological determinants of vaccine acceptance and hesitancy is  
5 crucial during a global pandemic. Across all countries surveyed, between March and  
6 September 2020, a substantial proportion of participants (up to 37% in some countries) said  
7 that they would *not* accept a hypothetical COVID-19 vaccine. People were slightly more  
8 likely to say that they would recommend it to vulnerable friends and family members.  
9 Considering who is more or less likely to report willingness to be vaccinated against COVID-  
10 19, being male, expressing general trust in those with scientific or medical expertise, and  
11 worrying about the virus are the most consistent correlates of vaccine acceptance across our  
12 samples. It is important to note that hesitancy about a COVID-19 vaccine is not purely  
13 attributable to people's attitudes to vaccines in general. Although (in the UK, where we  
14 studied it) negative attitudes towards vaccines in general are a significant and important  
15 correlate of COVID-19 vaccine refusal, there are clearly additional factors at play in  
16 determining public reactions to a COVID-19 vaccine. This broadly aligns with other research  
17 indicating that, for many people, there are concerns specifically around the rapid and novel  
18 development processes of COVID-19 vaccines and possible safety issues[36,57]. Our  
19 multivariate analyses show that the bulk of the burden of trust rests on science and medicine.  
20 This is in line with other recent studies specifically examining the association between trust  
21 in scientists and doctors, and COVID-19 vaccine hesitancy [26,27]. Accounting for the other  
22 factors in our model, we find that trust in government (both generally and regarding COVID-  
23 19) and general social trust (i.e. trust in people) are *not* significantly associated with vaccine  
24 acceptance in most of our samples. Since the period of data collection, more information  
25 about COVID-19 vaccines, including their safety and efficacy has become available. It

1  
2  
3 1 remains to be seen how this information has shifted vaccine intentions. As the public focus  
4  
5 2 has shifted from vaccine development to the regulatory approval and rollout of vaccines[11] ,  
6  
7 3 it is possible that trust in government and regulators may play a greater role in individuals'  
8  
9 4 vaccine decision making. However, further research is required to confirm this speculation.  
10  
11  
12

13 5 The fact that we saw only a weak link between stated vaccine acceptance and our  
14  
15 6 measure of prosociality—along with the fact that higher numbers of people said that they  
16  
17 7 would recommend the vaccine to a vulnerable friend or relative than say they would accept it  
18  
19 8 themselves—suggests that the prosocial nature of vaccines may not be recognized by many  
20  
21 9 people. Recent experimental research has shown that emphasizing the societal benefits of  
22  
23 10 herd immunity (i.e., the need for those who do not see themselves as personally vulnerable to  
24  
25 11 take the vaccine in order to provide protection for those who are) may assist uptake[58].  
26  
27 12 However, such strategies depend on vaccines preventing *transmission* of the virus, rather than  
28  
29 13 just symptoms. There is now preliminary evidence that this is the case for the Moderna and  
30  
31 14 Pfizer BioNTech vaccines [12], but further studies are required to confirm these findings.  
32  
33  
34  
35

36 15 The greater reluctance from women to say that they would take a vaccine is in line  
37  
38 16 with other work focusing on acceptance of a potential COVID-19 vaccine[18,19], and  
39  
40 17 vaccination generally[29] but has not been adequately explained. Even when general vaccine  
41  
42 18 beliefs are taken into account, however, the gender bias remains. Qualitative work should  
43  
44 19 focus on investigating this further, in order to understand the root of women's concerns about  
45  
46 20 the COVID-19 vaccine. We see very little effect of our measures of personal or governmental  
47  
48 21 efficacy, but this may be related to the fact that a vaccine against COVID-19 was  
49  
50 22 hypothetical at the time of the surveys and our measures did not directly ask about  
51  
52 23 vaccination.  
53  
54  
55  
56  
57  
58  
59  
60



1  
2  
3 1 Another important finding highlighted by our repeated samples is that vaccine  
4  
5 2 acceptance appears to be politicized in the US and is becoming so in the UK. Our US results  
6  
7 3 agree with previous US research focusing on COVID-19 vaccine acceptance[39,59], which  
8  
9 4 noted that political conservatives are less accepting of potential COVID-19 vaccines. Our UK  
10  
11 5 results align with those of Maher et al, who, through network analysis, show a pattern of  
12  
13 6 attitudinal alignment over time in a small UK sample, resulting in the emergence of a  
14  
15 7 politically conservative faction expressing less trust in scientists, doctors, and vaccines[21].  
16  
17 8 Although international research has suggested that political conservatism is correlated with  
18  
19 9 anti-vaccination attitudes globally[40], we did not find that ideology was associated with  
20  
21 10 vaccine acceptance outside of the US and UK. However most other countries were only  
22  
23 11 surveyed in earlier stages of the pandemic (i.e. prior to May, 2020) and we can therefore not  
24  
25 12 say whether they might have followed a similar pattern to the UK as time went on.

26  
27 13 It is possible that misinformation susceptibility[60,61] and conspiracy thinking[62]  
28  
29 14 underlie the association between ideology and vaccine attitudes to some extent. For example,  
30  
31 15 Motta et al[63] find that far right-wing media outlets have disproportionately spread  
32  
33 16 misinformation during the early stages of the pandemic. Susceptibility to misinformation  
34  
35 17 around COVID-19 was also found in prior research to be associated with measures of vaccine  
36  
37 18 hesitancy[61]. There is already a proliferation of conspiracy theories focused on specific  
38  
39 19 COVID-19 vaccines[64,65]. It will be important to tackle these pro-actively through  
40  
41 20 ‘prebunking’ methods to inoculate against misinformation[66,67].

42  
43 21 We must note that our surveys did not examine several sociodemographic factors that  
44  
45 22 could explain additional variance in vaccination intentions; ethnic minority status, socio-  
46  
47 23 economic status and underlying health conditions have all been shown to be associated with  
48  
49 24 COVID-19 vaccine hesitancy in some contexts [68,69]. Future research should examine how  
50  
51 25 these factors relate to vaccine confidence and intentions as vaccine campaigns progress.

1  
2  
3 1 Finally, we acknowledge that the heterogeneity in our results across time and  
4  
5 2 countries highlights the role that (unmeasured) contextual, country-specific factors play in  
6  
7 3 informing individuals' vaccination attitudes. As noted by the WHO SAGE working group on  
8  
9 4 vaccine hesitancy, individual factors such as trust and risk perception intersect with  
10  
11 5 contextual influences such as culture, media environments, and information from local  
12  
13 6 leaders[14]. Our samples were not truly representative of the general population in each  
14  
15 7 country: although they were quota-balanced on gender and age, the population that respond to  
16  
17 8 an online questionnaire will differ from the general population on several significant  
18  
19 9 characteristics. However, the rank ordering of countries on vaccine acceptance in our study is  
20  
21 10 similar to that of Lazarus et al[18], which were based on a random stratified sampling  
22  
23 11 approach using several online panel providers. This gives us some confidence in the  
24  
25 12 generalizability of our results, and the fact that our samples were generally larger and  
26  
27 13 included more trust-focused questions makes them useful for exploring these important  
28  
29 14 correlates of vaccine attitudes.

30  
31  
32  
33  
34  
35  
36 15 In terms of practical considerations, our finding that trust in scientific and medical  
37  
38 16 institutions is one of the strongest correlates of vaccine acceptance highlights the need to  
39  
40 17 work proactively with others from outside of this sphere, such as community and religious  
41  
42 18 leaders[70], to open a two-way conversation with those who distrust the scientific and  
43  
44 19 medical establishment. Due consideration must also be given to the accessibility[71],  
45  
46 20 format[72,73], and transparency[74,75] of information provided to the public. Future research  
47  
48 21 should continue to evaluate how to most effectively communicate evidence about  
49  
50 22 vaccination[76], and should seek to more deeply understand the concerns and needs of those  
51  
52 23 who express hesitancy regarding COVID-19 vaccination. As Bhopal[77], commenting on  
53  
54 24 potential COVID-19 mass vaccination efforts, writes, "Open, honest, factual and sensitively  
55  
56 25 conducted public dialogue is now urgent."

1  
2  
3 1  
4  
5  
6 2  
7  
8  
9 3  
10  
11 4  
12  
13 5  
14  
15 6  
16  
17 7  
18  
19 8  
20  
21 9  
22  
23 10  
24  
25 11  
26  
27 12  
28  
29 13  
30  
31 14  
32  
33 15  
34  
35 16  
36  
37 17  
38  
39  
40  
41  
42  
43  
44  
45  
46  
47  
48  
49  
50  
51  
52  
53  
54  
55  
56  
57  
58  
59  
60

## 2 CONCLUSIONS

3 Countries around the world face a major evidence communication challenge when it  
4 comes to the COVID-19 vaccines that are becoming available. In order to reach a large  
5 enough proportion of the population in each country to achieve herd immunity, it is vital to  
6 increase the number of people who are willing to take a vaccine. To achieve this, non-  
7 pharmaceutical interventions will need to be deployed[78], such as communicating  
8 trustworthy information about the vaccines via credible sources. In the current research, we  
9 have demonstrated across 12 national samples that people's level of worry about COVID-19  
10 and their trust in experts and medical and scientific institutions are key determinants of  
11 potential vaccine acceptance. Future research should confirm these findings in experimental  
12 settings. We recommend that empirical studies should continue to be carried out alongside  
13 qualitative work with different communities to get a rounded understanding of people's  
14 concerns and misunderstandings. Only by knowing these can we adequately address them  
15 and provide people with the information they need to make a decision that will affect not just  
16 their own health, but that of their community as well.

## 1 **FIGURE LEGENDS**

2 **Figure 1. COVID-19 vaccine acceptance across countries and time.** Percentage of  
3 respondents who stated they were willing to receive or recommend a COVID-19 vaccine  
4 across surveys. UK and US samples using different panel providers are reported separately.

5 **Figure 2. Correlates of vaccine acceptance.** Heatmap of odds ratios in multivariate logistic  
6 regression model predicting stated vaccine acceptance. Columns represent individual samples  
7 and rows represent independent variables in model. Grey values are non-significant,  $p > .05$ .  
8 Red shading indicates a lower likelihood of reported vaccine acceptance and blue shading a  
9 higher likelihood. For space, samples are defined by their two character ISO country code  
10 and a letter denoting participant source (B, BVA; D, Dynata; P, Prolific; R, Respondi).  
11 Political orientation data was not collected in the French sample; this sample is excluded  
12 from pooled data.

13 **Figure 3. Political ideology and vaccine acceptance in the UK.** Predicted likelihood that an  
14 individual will accept being vaccinated at varying levels of political ideology (1 = very  
15 liberal/left wing, 7 = very conservative/right wing) in UK samples over time.

16 **Figure 4. Negative general attitudes towards vaccination do not fully account for**  
17 **relationships in the model.** Results of multivariate logistic regression models investigating  
18 reported COVID-19 vaccine acceptance in UK samples, excluding (left panel) or including  
19 (right panel) general vaccine attitudes as an independent variable. Odds ratios shown are  
20 based on scaled variables (other than gender). Grey values are non-significant,  $p > .05$ . For  
21 space, samples are defined by a letter denoting participant source (P, Prolific; R, Respondi).

## 1 **Author contributions**

2 Survey instrument development: JRK, CRS, GR, SD, SvdL, ALJF. Study conceptualisation,  
3 design and theoretical framing: JRK, SvdL, ALJF. Data collection: JRK, CRS, GR, SD, US,  
4 CD, PA, ALJF. Statistical analyses and first draft: JRK, SvdL, ALJF. Manuscript editing,  
5 review and approval: JRK, CRS, GR, SD, US, CD, PA, ALJF, SvdL.

## 6 **Data availability**

7 The data and analysis code for this study are available at:

8 [https://osf.io/vgez2/?view\\_only=8fe81f5fe3f345a99b06edeaba6bd9e1](https://osf.io/vgez2/?view_only=8fe81f5fe3f345a99b06edeaba6bd9e1)

## 9 **Ethics approval**

10 This study was approved by the University of Cambridge Psychology Research Ethics  
11 Committee (PRE.2020.034).

## 12 **Funding**

13 This study was funded by the Winton Centre for Risk and Evidence Communication which is  
14 supported by the David and Claudia Harding Foundation. Award/Grant number is not  
15 applicable.

## 16 **Competing interests**

17 None declared.

## 18 **Acknowledgements**

19 We would like to thank María del Carmen Climent Palmer, Ban Mutsuhisa, Jin Park, and  
20 Giulia Luoni for additional translations, the University of Tokyo for their collaboration, and  
21 all the participants and those who helped to administer the study.

## 22 **Patient and Public Involvement**

23 Patients or the public were not involved in the design, or conduct, or reporting, or  
24 dissemination plans of our research.

1  
2  
3 1 **REFERENCES**  
4  
5 2  
6  
7 3 1 Porterfield C. Global Coronavirus Death Toll Tops 2.5 Million — Though New Fatalities  
8 4 Have Dropped. *Forbes*.  
9 5 2021. [https://www.forbes.com/sites/carlieporterfield/2021/02/25/global-coronavirus-death-toll-](https://www.forbes.com/sites/carlieporterfield/2021/02/25/global-coronavirus-death-toll-tops-25-million---though-new-fatalities-have-dropped/)  
10 6 [tops-25-million---though-new-fatalities-have-dropped/](https://www.forbes.com/sites/carlieporterfield/2021/02/25/global-coronavirus-death-toll-tops-25-million---though-new-fatalities-have-dropped/) (accessed 3 Mar 2021).  
11  
12 7 2 International Monetary Fund. *World Economic Outlook, October 2020: A Long and Difficult*  
13 8 *Ascent*. Washington, DC: 2020.  
14 9 [https://www.imf.org/en/Publications/WEO/Issues/2020/09/30/world-economic-outlook-](https://www.imf.org/en/Publications/WEO/Issues/2020/09/30/world-economic-outlook-october-2020)  
15 10 [october-2020](https://www.imf.org/en/Publications/WEO/Issues/2020/09/30/world-economic-outlook-october-2020) (accessed 29 Nov 2020).  
16  
17 11 3 Lytras T, Tsiodras S. Lockdowns and the COVID-19 pandemic: What is the endgame? *Scand.*  
18 12 *J. Public Health*. 2020. doi:10.1177/1403494820961293  
19  
20 13 4 Schoch-Spana M, Brunson EK, Long R, *et al*. The public's role in COVID-19 vaccination:  
21 14 human-centered recommendations to enhance pandemic vaccine awareness, access, and  
22 15 acceptance in the United States. *Vaccine* Published Online First: 29 October 2020.  
23 16 doi:10.1016/j.vaccine.2020.10.059  
24  
25 17 5 Callaway E. What Pfizer's landmark COVID vaccine results mean for the pandemic. *Nature*  
26 18 Published Online First: 9 November 2020. doi:10.1038/d41586-020-03166-8  
27  
28 19 6 Callaway E. COVID vaccine excitement builds as Moderna reports third positive result.  
29 20 *Nature* 2020;**587**:337–8. doi:10.1038/d41586-020-03248-7  
30  
31 21 7 BBC News. Covid vaccines: How fast is progress around the world? BBC News.  
32 22 <https://www.bbc.co.uk/news/world-56237778> (accessed 13 Apr 2021).  
33  
34 23 8 Gomes MGM, Corder R, King J, *et al*. Individual variation in susceptibility or exposure to  
35 24 SARS-CoV-2 lowers the herd immunity threshold. *medRxiv* Published Online First: 21 May  
36 25 2020. doi:10.1101/2020.04.27.20081893  
37  
38 26 9 Sanche S, Lin YT, Xu C, *et al*. High Contagiousness and Rapid Spread of Severe Acute  
39 27 Respiratory Syndrome Coronavirus 2. *Emerg Infect Dis* 2020;**26**:1470–7.  
40 28 doi:10.3201/eid2607.200282  
41  
42 29 10 Fontanet A, Cauchemez S. COVID-19 herd immunity: where are we? *Nat Rev Immunol*  
43 30 2020;**20**:583–4. doi:10.1038/s41577-020-00451-5  
44  
45 31 11 Kim JH, Marks F, Clemens JD. Looking beyond COVID-19 vaccine phase 3 trials. *Nat. Med.*  
46 32 2021;**27**:205–11. doi:10.1038/s41591-021-01230-y  
47  
48 33 12 Thompson MG, Burgess JL, Naleway AL, *et al*. Interim Estimates of Vaccine Effectiveness of  
49 34 BNT162b2 and mRNA-1273 COVID-19 Vaccines in Preventing SARS-CoV-2 Infection  
50 35 Among Health Care Personnel, First Responders, and Other Essential and Frontline Workers  
51 36 — Eight U.S. Locations, December 2020–March 2021. *CDC Morb Mortal Wkly Rep* 2021;**70**.  
52 37 doi:10.15585/mmwr.mm7013e3  
53  
54 38 13 Aschwanden C. Five reasons why COVID herd immunity is probably impossible. *Nature*  
55 39 2021;**591**:520–2. doi:10.1038/d41586-021-00728-2  
56  
57 40 14 WHO. Report of the Sage Working Group on Vaccine Hesitancy. 2014.  
58 41 [https://www.who.int/immunization/sage/meetings/2014/october/1\\_Report\\_WORKING\\_GRO](https://www.who.int/immunization/sage/meetings/2014/october/1_Report_WORKING_GROUP_vaccine_hesitancy_final.pdf)  
59 42 [UP\\_vaccine\\_hesitancy\\_final.pdf](https://www.who.int/immunization/sage/meetings/2014/october/1_Report_WORKING_GROUP_vaccine_hesitancy_final.pdf) (accessed 23 Nov 2020).  
60  
61 43 15 WHO. Ten threats to global health in 2019. 2019. [https://www.who.int/news-](https://www.who.int/news-room/spotlight/ten-threats-to-global-health-in-2019)  
62 44 [room/spotlight/ten-threats-to-global-health-in-2019](https://www.who.int/news-room/spotlight/ten-threats-to-global-health-in-2019) (accessed 20 Nov 2020).

- 1  
2  
3 1 16 Verger P, Dubé E. Restoring confidence in vaccines in the COVID-19 era. *Expert Rev.*  
4 2 *Vaccines*. 2020. doi:10.1080/14760584.2020.1825945
- 5  
6 3 17 Mesch GS, Schwirian KP. Social and political determinants of vaccine hesitancy: Lessons  
7 4 learned from the H1N1 pandemic of 2009-2010. *Am J Infect Control* 2015;**43**:1161–5.  
8 5 doi:10.1016/j.ajic.2015.06.031
- 9  
10 6 18 Lazarus J V., Ratzan SC, Palayew A, *et al.* A global survey of potential acceptance of a  
11 7 COVID-19 vaccine. *Nat Med* Published Online First: 20 October 2020. doi:10.1038/s41591-  
12 8 020-1124-9
- 13  
14 9 19 Wang J, Jing R, Lai X, *et al.* Acceptance of COVID-19 Vaccination during the COVID-19  
15 10 Pandemic in China. *Vaccines* 2020;**8**:482. doi:10.3390/vaccines8030482
- 16  
17 11 20 Frank K, Arim R. Canadians' willingness to get a COVID-19 vaccine when one becomes  
18 12 available: What role does trust play? *Stat. Canada*.  
19 13 2020. <https://www150.statcan.gc.ca/n1/pub/45-28-0001/2020001/article/00043-eng.htm>  
20 14 (accessed 22 Nov 2020).
- 21  
22 15 21 Maher PJ, MacCarron P, Quayle M. Mapping public health responses with attitude networks:  
23 16 the emergence of opinion-based groups in the UK's early COVID-19 response phase. *Br J Soc*  
24 17 *Psychol* 2020;**59**:641–52. doi:10.1111/bjso.12396
- 25  
26 18 22 Padhi BK, A. Almohaithef M. Determinants of COVID-19 vaccine acceptance in Saudi  
27 19 Arabia: a web-based national survey. *medRxiv* 2020;:2020.05.27.20114413.  
28 20 doi:10.1101/2020.05.27.20114413
- 29  
30 21 23 Soveri A, Karlsson LC, Antfolk J, *et al.* Unwillingness to engage in behaviors that protect  
31 22 against COVID-19: Conspiracy, trust, reactance, and endorsement of complementary and  
32 23 alternative medicine. doi:10.31234/OSF.IO/MHCTF
- 33  
34 24 24 Palamenghi L, Barello S, Boccia S, *et al.* Mistrust in biomedical research and vaccine  
35 25 hesitancy: the forefront challenge in the battle against COVID-19 in Italy. *Eur J Epidemiol*  
36 26 2020;**35**:785–8. doi:10.1007/s10654-020-00675-8
- 37  
38 27 25 Petravić L, Arh R, Gabrovec T, *et al.* Factors Affecting Attitudes towards COVID-19  
39 28 Vaccination: An Online Survey in Slovenia. *Vaccines* 2021;**9**:247.  
40 29 doi:10.3390/vaccines9030247
- 41  
42 30 26 Thaker J. The Persistence of Vaccine Hesitancy: COVID-19 Vaccination Intention in New  
43 31 Zealand. *J Health Commun* 2021;:1–8. doi:10.1080/10810730.2021.1899346
- 44  
45 32 27 Jennings W, Stoker G, Willis H, *et al.* Lack of trust and social media echo chambers predict  
46 33 COVID-19 vaccine hesitancy. *medRxiv* 2021;:2021.01.26.21250246.  
47 34 doi:10.1101/2021.01.26.21250246
- 48  
49 35 28 Larson HJ, Cooper LZ, Eskola J, *et al.* Addressing the vaccine confidence gap. *Lancet*.  
50 36 2011;**378**:526–35. doi:10.1016/S0140-6736(11)60678-8
- 51  
52 37 29 de Figueiredo A, Simas C, Karafillakis E, *et al.* Mapping global trends in vaccine confidence  
53 38 and investigating barriers to vaccine uptake: a large-scale retrospective temporal modelling  
54 39 study. *Lancet* 2020;**396**:898–908. doi:10.1016/S0140-6736(20)31558-0
- 55  
56 40 30 National Academies of Sciences, Medicine, and Engineering. Trust and Confidence at the  
57 41 Interfaces of the Life Sciences and Society. A Workshop Summary. Washington, DC: 2015.  
58 42 <https://www.nap.edu/read/21798>
- 59  
60 43 31 Hartman RO, Dieckmann NF, Sprenger AM, *et al.* Modeling attitudes toward science:  
44 Development and validation of the credibility of science scale. *Basic Appl Soc Psych*  
45 2017;**39**:358–71. doi:10.1080/01973533.2017.1372284



1  
2  
3  
4  
5  
6  
7  
8  
9  
10  
11  
12  
13  
14  
15  
16  
17  
18  
19  
20  
21  
22  
23  
24  
25  
26  
27  
28  
29  
30  
31  
32  
33  
34  
35  
36  
37  
38  
39  
40  
41  
42  
43  
44  
45  
46  
47  
48  
49  
50  
51  
52  
53  
54  
55  
56  
57  
58  
59  
60

- 1 32 Brewer PR, Ley BL. Whose science do you believe? Explaining trust in sources of scientific information about the environment. *Sci Commun* 2013;**35**:115–37. doi:10.1177/1075547012441691
- 2 33 Becker MH. The Health Belief Model and Sick Role Behavior. *Health Educ Monogr* 1974;**2**:409–19. doi:10.1177/109019817400200407
- 3 34 Rogers RW. A Protection Motivation Theory of Fear Appeals and Attitude Change. *J Psychol* 1975;**91**:93–114. doi:10.1080/00223980.1975.9915803
- 4 35 Ling M, Kothe EJ, Mullan BA. Predicting intention to receive a seasonal influenza vaccination using Protection Motivation Theory. *Soc Sci Med* 2019;**233**:87–92. doi:10.1016/j.socscimed.2019.06.002
- 5 36 Dror AA, Eisenbach N, Taiber S, *et al*. Vaccine hesitancy: the next challenge in the fight against COVID-19. *Eur J Epidemiol* 2020;**35**:775–9. doi:10.1007/s10654-020-00671-y
- 6 37 Kelly B, Bann C, Squiers L, *et al*. Predicting willingness to vaccinate for COVID-19 in the US. *JCH Impact*. 2020. <https://jhcimpact.com/posts/f/predicting-willingness-to-vaccinate-for-covid-19-in-the-us> (accessed 22 Nov 2020).
- 7 38 Wong LP, Alias H, Wong P-F, *et al*. The use of the health belief model to assess predictors of intent to receive the COVID-19 vaccine and willingness to pay. *Hum Vaccin Immunother* 2020;**16**:2204–14. doi:10.1080/21645515.2020.1790279
- 8 39 Kreps S, Prasad S, Brownstein JS, *et al*. Factors Associated With US Adults' Likelihood of Accepting COVID-19 Vaccination. *JAMA Netw open* 2020;**3**:e2025594. doi:10.1001/jamanetworkopen.2020.25594
- 9 40 Hornsey MJ, Harris EA, Fielding KS. The Psychological Roots of Anti-Vaccination Attitudes: A 24-Nation Investigation. *Heal Psychol* 2018;**37**:307–15. doi:10.1037/hea0000586.supp
- 10 41 Hornsey MJ, Finlayson M, Chatwood G, *et al*. Donald Trump and vaccination: The effect of political identity, conspiracist ideation and presidential tweets on vaccine hesitancy. *J Exp Soc Psychol* 2020;**88**:103947. doi:10.1016/j.jesp.2019.103947
- 11 42 Lewandowsky S, Gignac GE, Oberauer K. The role of conspiracist ideation and worldviews in predicting rejection of science. *PLoS One* 2013;**8**:e75637. doi:10.1371/journal.pone.0075637
- 12 43 Reyna VF, Nelson WL, Han PK, *et al*. How Numeracy Influences Risk Comprehension and Medical Decision Making. *Psychol Bull* 2009;**135**:943–73. doi:10.1037/a0017327
- 13 44 Betsch C, Schmid P, Heinemeier D, *et al*. Beyond confidence: Development of a measure assessing the 5C psychological antecedents of vaccination. *PLoS One* 2018;**13**:e0208601. doi:10.1371/journal.pone.0208601
- 14 45 Jang WM, Kim UN, Jang DH, *et al*. Influence of trust on two different risk perceptions as an affective and cognitive dimension during Middle East respiratory syndrome coronavirus (MERS-CoV) outbreak in South Korea: Serial cross-sectional surveys. *BMJ Open* 2020;**10**:33026. doi:10.1136/bmjopen-2019-033026
- 15 46 Prolific. Representative Samples on Prolific. <https://researcher-help.prolific.co/hc/en-gb/articles/360019236753-Representative-Samples-on-Prolific> (accessed 19 Oct 2020).
- 16 47 Hale T, Angrist N, Goldszmidt R, *et al*. A global panel database of pandemic policies (Oxford COVID-19 Government Response Tracker). *Nat Hum Behav* 2021;:1–10. doi:10.1038/s41562-021-01079-8
- 17 48 Ali H, Hossain MF, Hasan MM, *et al*. Covid-19 Dataset: Worldwide spread log including countries first case and first death. *Data Br* 2020;**32**:106173. doi:10.1016/j.dib.2020.106173

- 1  
2  
3 1 49 Moderna. Moderna Ships mRNA Vaccine Against Novel Coronavirus (mRNA-1273) for  
4 2 Phase 1 Study. 2020.<https://investors.modernatx.com/news-releases/news-release->  
5 3 [details/moderna-ships-mrna-vaccine-against-novel-coronavirus-mrna-1273](https://investors.modernatx.com/news-releases/news-release-) (accessed 1 Apr  
6 4 2021).
- 8 5 50 University of Oxford. Oxford team to begin novel coronavirus vaccine research.  
9 6 2020.<https://www.ox.ac.uk/news/2020-02-07-oxford-team-begin-novel-coronavirus-vaccine->  
10 7 [research](https://www.ox.ac.uk/news/2020-02-07-oxford-team-begin-novel-coronavirus-vaccine-) (accessed 1 Apr 2021).
- 12 8 51 Adams ben. Pfizer, BioNTech start their COVID-19 vax phase 3, squaring off with Moderna .  
13 9 Fierce Biotech. 2020.<https://www.fiercebiotech.com/biotech/pfizer-biontech-start-their-covid->  
14 10 [vax-phase-3-squaring-off-moderna](https://www.fiercebiotech.com/biotech/pfizer-biontech-start-their-covid-) (accessed 1 Apr 2021).
- 16 11 52 National Institutes of Health. Phase 3 Clinical Testing in the US of AstraZeneca COVID-19  
17 12 Vaccine Candidate Begins. 2020.<https://www.nih.gov/news-events/news-releases/phase-3->  
18 13 [clinical-testing-us-astrazeneca-covid-19-vaccine-candidate-begins](https://www.nih.gov/news-events/news-releases/phase-3-) (accessed 1 Apr 2021).
- 20 14 53 Cokely ET, Galesic M, Schulz E, *et al.* Measuring risk literacy: The Berlin Numeracy Test.  
21 15 *Judgm Decis Mak* 2012;**7**:25–47.
- 22 16 54 Lipkus IM, Samsa G, Rimer BK. General performance on a numeracy scale among highly  
23 17 educated samples. *Med Decis Mak* 2001;**21**:37–44. doi:10.1177/0272989X0102100105
- 25 18 55 Lundmark S, Gilljam M, Dahlberg S. Measuring Generalized Trust. *Public Opin. Q.*  
26 19 2016;**80**:26–43. doi:10.1093/poq/nfv042
- 28 20 56 Bryan ML, Jenkins SP. Multilevel Modelling of Country Effects: A Cautionary Tale. *Eur*  
29 21 *Sociol Rev* 2016;**32**:3–22. doi:10.1093/esr/jcv059
- 31 22 57 Campbell D. Protecting others and record of vaccines main reasons to get Covid jab, poll  
32 23 shows. *Guardian*. 2020.<https://www.theguardian.com/society/2020/nov/30/covid-protecting->  
33 24 [others-and-record-of-vaccines-main-reasons-to-get-jab](https://www.theguardian.com/society/2020/nov/30/covid-protecting-)
- 34 25 58 Betsch C, Böhm R, Korn L, *et al.* On the benefits of explaining herd immunity in vaccine  
35 26 advocacy. *Nat Hum Behav* 2017;**1**:0056. doi:10.1038/s41562-017-0056
- 37 27 59 Carpiano RM. Demographic differences in US adult intentions to receive a potential  
38 28 coronavirus vaccine and implications for ongoing study. doi:10.1101/2020.09.07.20190058
- 40 29 60 Calvillo DP, Ross BJ, Garcia RJB, *et al.* Political Ideology Predicts Perceptions of the Threat  
41 30 of COVID-19 (and Susceptibility to Fake News About It). *Soc Psychol Personal Sci*  
42 31 2020;**11**:1119–28. doi:10.1177/1948550620940539
- 44 32 61 Roozenbeek J, Schneider CR, Dryhurst S, *et al.* Susceptibility to misinformation about  
45 33 COVID-19 around the world. *R Soc Open Sci* 2020;**7**:201199. doi:10.1098/rsos.201199
- 46 34 62 Linden S, Panagopoulos C, Azevedo F, *et al.* The Paranoid Style in American Politics  
47 35 Revisited: An Ideological Asymmetry in Conspiratorial Thinking. *Polit Psychol*  
48 36 2020;**;**pops.12681. doi:10.1111/pops.12681
- 50 37 63 Motta M, Stecula D, Farhart C. How right-leaning media coverage of Covid-19 facilitated the  
51 38 spread of misinformation in the early stages of the pandemic in the U.S. *Can J Polit Sci*  
52 39 2020;**53**:335–42. doi:10.1017/S0008423920000396
- 54 40 64 Reuters. Fact check: Dr. Fauci was not the first CEO and other false claims about biotech  
55 41 company Moderna. Reuters. 2020.<https://uk.reuters.com/article/uk-factcheck-moderna-fauci->  
56 42 [gates/fact-check-dr-fauci-was-not-the-first-ceo-and-other-false-claims-about-biotech-](https://uk.reuters.com/article/uk-factcheck-moderna-fauci-)  
57 43 [company-moderna-idUSKBN25S5GD](https://uk.reuters.com/article/uk-factcheck-moderna-fauci-) (accessed 23 Nov 2020).
- 59 44 65 May L. Antivaxxers share conspiracy theories after Pfizer announcement. *Dly. Mail*.  
60 45 2020.<https://www.dailymail.co.uk/news/article-8934447/Antivaxxers-share-conspiracy->

1  
2  
3  
4  
5  
6  
7  
8  
9  
10  
11  
12  
13  
14  
15  
16  
17  
18  
19  
20  
21  
22  
23  
24  
25  
26  
27  
28  
29  
30  
31  
32  
33  
34  
35  
36  
37  
38  
39  
40  
41  
42  
43  
44  
45  
46  
47  
48  
49  
50  
51  
52  
53  
54  
55  
56  
57  
58  
59  
60

- 1 theories-Pfizer-announcement.html (accessed 23 Nov 2020).
- 2
- 3 1 theories-Pfizer-announcement.html (accessed 23 Nov 2020).
- 4
- 5 2 66 Roozenbeek J, van der Linden S, Nygren T. Prebunking interventions based on ‘inoculation’
- 6 3 theory can reduce susceptibility to misinformation across cultures. *Harvard Kennedy Sch*
- 7 4 *Misinformation Rev* 2020;**1**. doi:10.37016//mr-2020-008
- 8
- 9 5 67 Jolley D, Douglas KM. Prevention is better than cure: Addressing anti-vaccine conspiracy
- 10 6 theories. *J Appl Soc Psychol* 2017;**47**:459–69. doi:10.1111/jasp.12453
- 11
- 12 7 68 Kim D. Associations of Race/Ethnicity and Other Demographic and Socioeconomic Factors
- 13 8 with Vaccination During the COVID-19 Pandemic in the United States. *medRxiv*
- 14 9 2021;:2021.02.16.21251769. doi:10.1101/2021.02.16.21251769
- 15
- 16 10 69 Williams L, Flowers P, McLeod J, *et al*. Social patterning and stability of intention to accept a
- 17 11 COVID-19 vaccine in scotland: Will those most at risk accept a vaccine? *Vaccines* Published
- 18 12 Online First: 2021. doi:10.3390/vaccines9010017
- 19
- 20 13 70 Jarrett C, Wilson R, O’Leary M, *et al*. Strategies for addressing vaccine hesitancy – A
- 21 14 systematic review. *Vaccine* 2015;**33**:4180–90. doi:10.1016/j.vaccine.2015.04.040
- 22
- 23 15 71 O’Neill O. Accountability, trust and informed consent in medical practice and research. *Clin*
- 24 16 *Med J R Coll Physicians London* 2004;**4**:269–76. doi:10.7861/clinmedicine.4-3-269
- 25
- 26 17 72 Schwartz LM, Woloshin S, Welch HG. Using a Drug Facts Box to Communicate Drug
- 27 18 Benefits and Harms. *Ann Intern Med* 2009;**150**:516–27.
- 28
- 29 19 73 Brick C, McDowell M, Freeman ALJ. Risk communication in tables versus text: A registered
- 30 20 report randomized trial on ‘fact boxes’. *R Soc Open Sci* 2020;**7**. doi:10.1098/rsos.190876
- 31
- 32 21 74 Blastland M, Freeman ALJ, van der Linden S, *et al*. Five rules for evidence communication.
- 33 22 *Nature* 2020;**587**:362–4. doi:10.1038/d41586-020-03189-1
- 34
- 35 23 75 van der Bles AM, van der Linden S, Freeman ALJ, *et al*. The effects of communicating
- 36 24 uncertainty on public trust in facts and numbers. 2020.
- 37
- 38 25 76 Kerr JR, Freeman ALJ, Marteau TM, *et al*. Effect of Information about COVID-19 Vaccine
- 39 26 Effectiveness and Side Effects on Behavioural Intentions: Two Online Experiments. *Vaccines*
- 40 27 2021;**9**:379. doi:10.3390/vaccines9040379
- 41
- 42 28 77 Bhopal RS. COVID-19 zugzwang: Potential public health moves towards population (herd
- 43 29 immunity. *Public Heal Pract* 2020;**1**:100031. doi:10.1016/j.puhip.2020.100031
- 44
- 45 30 78 Van Bavel JJ, Baicker K, Boggio PS, *et al*. Using social and behavioural science to support
- 46 31 COVID-19 pandemic response. *Nat Hum Behav* 2020;**4**:460–71. doi:10.1038/s41562-020-
- 47 32 0884-z
- 48
- 49
- 50
- 51
- 52
- 53
- 54
- 55
- 56
- 57
- 58
- 59
- 60



Figure 1. COVID-19 vaccine acceptance across countries and time. Percentage of respondents who stated they were willing to receive or recommend a COVID-19 vaccine across surveys. UK and US samples using different panel providers are reported separately

199x199mm (300 x 300 DPI)



Figure 2. Correlates of vaccine acceptance. Heatmap of odds ratios in multivariate logistic regression model predicting stated vaccine acceptance. Columns represent individual samples and rows represent independent variables in model. Grey values are non-significant,  $p > .05$ . Red shading indicates a lower likelihood of reported vaccine acceptance and blue shading a higher likelihood. For space, samples are defined by their two character ISO country code and a letter denoting participant source (B, BVA; D, Dynata; P, Prolific; R, Respondi). Political orientation data was not collected in the French sample; this sample is excluded from pooled data.

299x159mm (300 x 300 DPI)

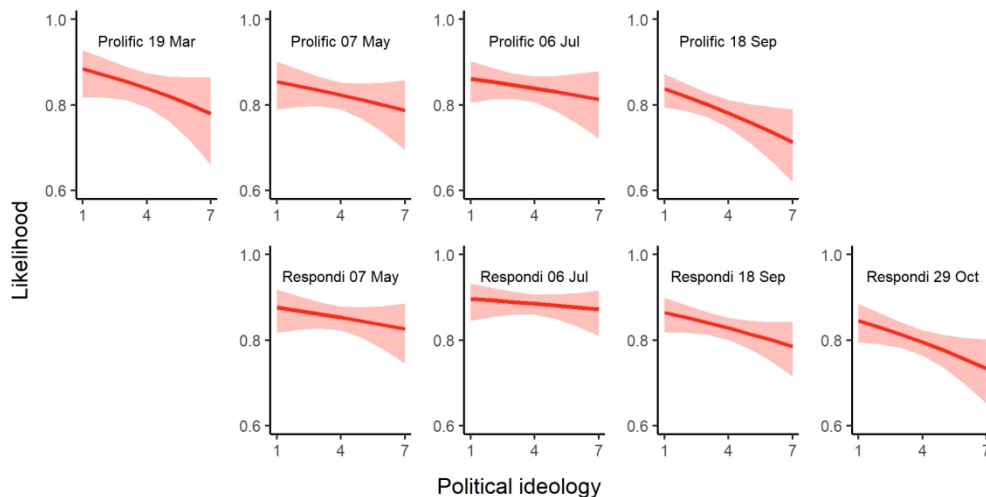

Figure 3. Political ideology and vaccine acceptance in the UK. Predicted likelihood that an individual will accept being vaccinated at varying levels of political ideology (1 = very liberal/left wing, 7 = very conservative/right wing) in UK samples over time.

177x88mm (300 x 300 DPI)



1  
2  
3  
4  
5  
6  
7  
8  
9  
10  
11  
12  
13  
14  
15  
16  
17  
18  
19  
20  
21  
22  
23  
24  
25  
26  
27  
28  
29  
30  
31  
32  
33  
34  
35  
36  
37  
38  
39  
40  
41  
42  
43  
44  
45  
46  
47  
48  
49  
50  
51  
52  
53  
54  
55  
56  
57  
58  
59  
60

|                                        | Base model |            |            | Including general vaccine attitudes |            |            |
|----------------------------------------|------------|------------|------------|-------------------------------------|------------|------------|
|                                        | UK_P (Sep) | UK_R (Sep) | UK_R (Oct) | UK_P (Sep)                          | UK_R (Sep) | UK_R (Oct) |
| Age                                    | 1.12       | 1.39       | 1.37       | 1.15                                | 1.32       | 1.25       |
| Gender (Female)                        | 0.62       | 0.50       | 0.44       | 0.63                                | 0.49       | 0.43       |
| Education                              | 1.02       | 1.11       | 1.18       | 1.00                                | 1.08       | 1.14       |
| Numeracy                               | 1.12       | 1.00       | 1.00       | 1.06                                | 0.93       | 0.87       |
| Politics (Conservative)                | 0.85       | 0.88       | 0.86       | 0.85                                | 0.87       | 0.85       |
| Prosociality                           | 1.11       | 1.09       | 1.07       | 1.10                                | 1.08       | 1.04       |
| General social trust                   | 1.03       | 1.09       | 0.97       | 1.03                                | 1.04       | 0.96       |
| General trust: Experts                 | 1.39       | 1.23       | 1.45       | 1.28                                | 1.11       | 1.29       |
| General trust: Govt                    | 1.27       | 1.14       | 1.03       | 1.24                                | 1.16       | 0.99       |
| COVID trust: Politicians               | 0.93       | 1.11       | 1.26       | 0.95                                | 1.17       | 1.35       |
| COVID Trust: National sci/med advisors | 1.14       | 1.25       | 1.29       | 1.12                                | 1.14       | 1.20       |
| COVID Trust: Independent scientists    | 0.93       | 0.88       | 1.00       | 0.95                                | 0.90       | 0.95       |
| COVID Trust: WHO                       | 1.45       | 1.32       | 1.04       | 1.41                                | 1.33       | 1.03       |
| Personal efficacy                      | 1.10       | 1.03       | 1.03       | 1.06                                | 1.00       | 0.98       |
| Govt efficacy                          | 1.00       | 0.95       | 1.04       | 1.01                                | 0.95       | 1.08       |
| Perceived infection risk               | 1.04       | 1.09       | 0.99       | 1.02                                | 1.12       | 0.97       |
| Worry about COVID                      | 1.37       | 1.56       | 1.43       | 1.36                                | 1.47       | 1.39       |
| General vaccine attitudes              |            |            |            | 1.69                                | 2.08       | 2.32       |
| Tjur $R^2$                             | 0.19       | 0.17       | 0.19       | 0.24                                | 0.25       | 0.28       |

Figure 3. Political ideology and vaccine acceptance in the UK. Predicted likelihood that an individual will accept being vaccinated at varying levels of political ideology (1 = very liberal/left wing, 7 = very conservative/right wing) in UK samples over time.

159x149mm (300 x 300 DPI)



## Correlates of intended COVID-19 vaccine acceptance across time and countries: Results from a series of cross-sectional surveys

### Supplementary material

Table S1

Survey items and wording

| Variable                     | Wording                                                                                                                                       | Response                                                                                                                                                                                                                                                                                                                                                                                                                                      |
|------------------------------|-----------------------------------------------------------------------------------------------------------------------------------------------|-----------------------------------------------------------------------------------------------------------------------------------------------------------------------------------------------------------------------------------------------------------------------------------------------------------------------------------------------------------------------------------------------------------------------------------------------|
| Gender                       | What is your gender?                                                                                                                          | 0 =Male, 1= Female, 'Other' and 'Prefer not to say' (included in Prolific samples only) coded as missing.                                                                                                                                                                                                                                                                                                                                     |
| Age                          | What is your age?                                                                                                                             | Age in years                                                                                                                                                                                                                                                                                                                                                                                                                                  |
| Education                    | Please indicate your highest educational qualification                                                                                        | 1 = No formal education above age 16, 2 = Professional or technical qualifications above age 16, 3 = School education up to age 18, 4 = Degree (Bachelors) or equivalent, 5 = Degree (Masters) or other postgraduate qualification, 6 = Doctorate [In France] 1 = No diploma, 2 =Primary school certificate, 3 = BEPC - Brevet des colleges, 4 = CAP / BEP, 5 = BAC / professional certificate / technical certificate, 6 = BAC +2 and above. |
| Numeracy (summed; range 1-5) | Adaptive Berlin Numeracy test (2-3items, see Cokely et al., 2012 for details).<br>Which represents the highest risk of something happening?   | Scores range 1-4<br>1 = '1 in 10' (correct), 2 = '1 in 1000', 3 = '1 in 100'                                                                                                                                                                                                                                                                                                                                                                  |
| Politics                     | Where do you feel your political views lie on a spectrum of left wing (or liberal) to right wing (or conservative)?                           | 1 = Very liberal/left, 7 = Very conservative/right                                                                                                                                                                                                                                                                                                                                                                                            |
| Prosociality                 | To what extent do you think it's important to do things for the benefit of others and society even if they have some costs to you personally? | 1 = Not at all, 7 = Very much so                                                                                                                                                                                                                                                                                                                                                                                                              |

1  
2  
3  
4  
5  
6  
7  
8  
9  
10  
11  
12  
13  
14  
15  
16  
17  
18  
19  
20  
21  
22  
23  
24  
25  
26  
27  
28  
29  
30  
31  
32  
33  
34  
35  
36  
37  
38  
39  
40  
41  
42  
43  
44  
45  
46

|                                        |                                                                                                                                                                                                                                                                                                                                      |                                                                                                                                                                            |
|----------------------------------------|--------------------------------------------------------------------------------------------------------------------------------------------------------------------------------------------------------------------------------------------------------------------------------------------------------------------------------------|----------------------------------------------------------------------------------------------------------------------------------------------------------------------------|
| General social trust                   | Generally speaking, would you say most people can be trusted, or that you can't be too careful in dealing with people?                                                                                                                                                                                                               | 1 = Can't be too careful, 7 = Most people can be trusted                                                                                                                   |
| General trust: Experts (scale)         | How much do you trust each of the following? -<br>Medical doctors and nurses<br>How much do you trust each of the following? -<br>Scientists<br>How much do you trust each of the following? -<br>Scientific knowledge                                                                                                               | 1 = Cannot be trusted at all, 5 = Can be trusted a lot<br>1 = Cannot be trusted at all, 5 = Can be trusted a lot<br>1 = Cannot be trusted at all, 5 = Can be trusted a lot |
| General trust: Govt (scale)            | How much do you trust each of the following? -<br>Civil servants or public officials in the country you are living in<br>How much do you trust each of the following? -<br>The current government of the country you are living in<br>How much do you trust each of the following? -<br>Politicians in the country you are living in | 1 = Cannot be trusted at all, 5 = Can be trusted a lot<br>1 = Cannot be trusted at all, 5 = Can be trusted a lot<br>1 = Cannot be trusted at all, 5 = Can be trusted a lot |
| COVID trust: Politicians               | How much do you trust the country's politicians to deal effectively with the pandemic?                                                                                                                                                                                                                                               | 1 = Not at all, 7 = Very much                                                                                                                                              |
| COVID Trust: National sci/med advisors | How much do you trust the country's national scientific and medical advisors to know the best measures to take in the face of the pandemic?                                                                                                                                                                                          | 1 = Not at all, 7 = Very much                                                                                                                                              |
| COVID Trust: Independent scientists    | How much do you trust experts who are not connected with the government who are commenting on measures planned for the pandemic?                                                                                                                                                                                                     | 1 = Not at all, 7 = Very much                                                                                                                                              |
| COVID Trust: WHO                       | How much do you trust the World Health Organisation to know the best measures to take in the face of the pandemic?                                                                                                                                                                                                                   | 1 = Not at all, 7 = Very much                                                                                                                                              |
| Personal efficacy                      | To what extent do you feel that the personal actions you are taking to try to limit the spread of coronavirus make a difference?                                                                                                                                                                                                     | 1 = Not at all, 7 = Very much                                                                                                                                              |
| Govt efficacy                          | To what extent do you feel the actions that your country is taking to limit the spread of coronavirus make a difference?                                                                                                                                                                                                             | 1 = Not at all, 7 = Very much                                                                                                                                              |

|    |                                  |                                                                                                                                                                                                                   |                                                      |
|----|----------------------------------|-------------------------------------------------------------------------------------------------------------------------------------------------------------------------------------------------------------------|------------------------------------------------------|
| 1  |                                  |                                                                                                                                                                                                                   |                                                      |
| 2  |                                  |                                                                                                                                                                                                                   |                                                      |
| 3  | Perceived infection risk (scale) | How likely do you think it is that you will be directly and personally affected by the following in the next 6 months? - Catching the coronavirus/COVID-19                                                        | 1= Not at all likely, 7 = Very likely                |
| 4  |                                  |                                                                                                                                                                                                                   |                                                      |
| 5  |                                  | How likely do you think it is that your friends and family in the country you are currently living in will be directly affected by the following in the next 6 months? - Catching the coronavirus/COVID-19        | 1= Not at all likely, 7 = Very likely                |
| 6  |                                  |                                                                                                                                                                                                                   |                                                      |
| 7  |                                  |                                                                                                                                                                                                                   |                                                      |
| 8  |                                  |                                                                                                                                                                                                                   |                                                      |
| 9  |                                  |                                                                                                                                                                                                                   |                                                      |
| 10 |                                  |                                                                                                                                                                                                                   |                                                      |
| 11 |                                  |                                                                                                                                                                                                                   |                                                      |
| 12 |                                  |                                                                                                                                                                                                                   |                                                      |
| 13 |                                  | How much do you agree or disagree with the following statements? - I will probably get sick with the coronavirus/COVID-19.                                                                                        | 1 = Strongly disagree, 5 = Strongly agree (rescaled) |
| 14 |                                  |                                                                                                                                                                                                                   |                                                      |
| 15 |                                  |                                                                                                                                                                                                                   |                                                      |
| 16 | Worry about COVID                | How worried are you personally about the following issues at present? - Coronavirus/COVID-19                                                                                                                      | 1 = Not at all worried, 7 = Very worried             |
| 17 |                                  |                                                                                                                                                                                                                   |                                                      |
| 18 |                                  |                                                                                                                                                                                                                   |                                                      |
| 19 | Vaccine - acceptance             | If a vaccine were to be available for the coronavirus/COVID-19 now: - Would you get vaccinated yourself?                                                                                                          | 0 = No, 1 = Yes                                      |
| 20 |                                  |                                                                                                                                                                                                                   |                                                      |
| 21 |                                  |                                                                                                                                                                                                                   |                                                      |
| 22 | Vaccine – recommend to others    | If a vaccine were to be available for the coronavirus/COVID-19 now: - Would you recommend vulnerable friends/family to get vaccinated?                                                                            | 0 = No, 1 = Yes                                      |
| 23 |                                  |                                                                                                                                                                                                                   |                                                      |
| 24 |                                  |                                                                                                                                                                                                                   |                                                      |
| 25 |                                  |                                                                                                                                                                                                                   |                                                      |
| 26 | General vaccine attitudes        | Please let us know how much you agree or disagree with the following statements about vaccines in general: - I believe that vaccines are a safe and reliable way to help avert the spread of preventable diseases | 1 = Strongly disagree, 5 = Strongly agree            |
| 27 |                                  |                                                                                                                                                                                                                   |                                                      |
| 28 |                                  | Please let us know how much you agree or disagree with the following statements about vaccines in general: - Vaccinations are one of the most significant contributions to public health                          | 1 = Strongly disagree, 5 = Strongly agree            |
| 29 |                                  |                                                                                                                                                                                                                   |                                                      |
| 30 |                                  |                                                                                                                                                                                                                   |                                                      |
| 31 |                                  |                                                                                                                                                                                                                   |                                                      |
| 32 |                                  |                                                                                                                                                                                                                   |                                                      |
| 33 |                                  |                                                                                                                                                                                                                   |                                                      |
| 34 |                                  |                                                                                                                                                                                                                   |                                                      |
| 35 |                                  |                                                                                                                                                                                                                   |                                                      |
| 36 |                                  |                                                                                                                                                                                                                   |                                                      |
| 37 |                                  |                                                                                                                                                                                                                   |                                                      |
| 38 |                                  |                                                                                                                                                                                                                   |                                                      |
| 39 |                                  |                                                                                                                                                                                                                   |                                                      |
| 40 |                                  |                                                                                                                                                                                                                   |                                                      |
| 41 |                                  |                                                                                                                                                                                                                   |                                                      |
| 42 |                                  |                                                                                                                                                                                                                   |                                                      |
| 43 |                                  |                                                                                                                                                                                                                   |                                                      |
| 44 |                                  |                                                                                                                                                                                                                   |                                                      |
| 45 |                                  |                                                                                                                                                                                                                   |                                                      |
| 46 |                                  |                                                                                                                                                                                                                   |                                                      |

Table S2

Percentage of missing values for predictor and outcome variables across all samples.

| Variable                                     | AU_D<br>(Mar) | CN_R<br>(Apr) | DE_R<br>(Mar) | ES_R<br>(Mar) | ES_R<br>(May) | FR_B<br>(Apr) | IT_R<br>(Mar) | JP_R<br>(Apr) | KR_R<br>(Apr) | MX_R<br>(Mar) | MX_R<br>(May) | SE_R<br>(Apr) | SE_R<br>(Mar) | UK_P<br>(Jul) | UK_P<br>(Mar) | UK_P<br>(May) | UK_P<br>(Sep) | UK_R<br>(Jul) | UK_R<br>(Jun) | UK_R<br>(May) | UK_R<br>(Oct) | UK_R<br>(Sep) | US_P<br>(Mar) | US_R<br>(May) | US_R<br>(Sep) |
|----------------------------------------------|---------------|---------------|---------------|---------------|---------------|---------------|---------------|---------------|---------------|---------------|---------------|---------------|---------------|---------------|---------------|---------------|---------------|---------------|---------------|---------------|---------------|---------------|---------------|---------------|---------------|
| Age                                          | 5.4           | 0.6           | 3.9           | 2.1           | 1.6           | 0.0           | 20.9          | 2.3           | 0.4           | 8.8           | 1.1           | 1.7           | 4.6           | 0.1           | 0.0           | 0.3           | 0.1           | 1.8           | 1.2           | 1.5           | 1.0           | 1.7           | 0.1           | 1.3           | 0.0           |
| Gender [Female]                              | 0.0           | 0.0           | 0.0           | 0.0           | 0.0           | 0.0           | 0.0           | 0.0           | 0.0           | 0.0           | 0.0           | 0.0           | 0.0           | 0.5           | 0.4           | 0.3           | 0.6           | 0.0           | 0.0           | 0.0           | 0.0           | 0.0           | 0.4           | 0.0           | 0.1           |
| Education                                    | 5.6           | 0.3           | 3.9           | 1.7           | 0.6           | 0.0           | 20.1          | 1.0           | 0.3           | 7.8           | 0.3           | 0.4           | 3.9           | 0.0           | 0.0           | 0.0           | 0.0           | 0.5           | -             | 0.1           | 0.1           | 0.5           | 0.0           | 0.3           | -             |
| Numeracy                                     | 6.7           | 1.9           | 6.6           | 3.1           | 2.7           | 1.1           | 21.1          | 6.2           | 2.0           | 8.1           | 0.3           | 3.1           | 5.6           | 0.1           | 0.1           | 0.3           | 0.2           | 3.5           | 2.2           | 1.8           | 0.9           | 2.3           | 0.1           | 1.4           | 0.2           |
| Politics<br>[Conservative]                   | 5.6           | -             | 4.1           | 2.1           | 0.6           | -             | 20.3          | 9.2           | 0.1           | 7.9           | 0.9           | 0.9           | 4.1           | 0.1           | 0.0           | 0.1           | 0.1           | 0.6           | 1.2           | 0.3           | 0.3           | 0.8           | 0.0           | 0.4           | 0.2           |
| Prosociality                                 | 1.0           | 0.1           | 0.3           | 0.7           | 0.1           | 0.0           | 1.7           | 0.0           | 0.1           | 0.7           | 0.0           | 0.0           | 0.7           | 0.0           | 0.0           | 0.0           | 0.0           | 0.5           | 0.0           | 0.6           | 0.1           | 0.2           | 0.0           | 0.1           | 0.0           |
| General social trust                         | 0.0           | 0.0           | 0.1           | 0.3           | 0.3           | 0.0           | 0.4           | 0.0           | 0.1           | 0.0           | 0.3           | 0.4           | 0.0           | 0.0           | 0.0           | 0.0           | 0.1           | 0.0           | 0.0           | 0.1           | 0.1           | 0.2           | 0.0           | 0.1           | 0.0           |
| General trust: Experts                       | 0.0           | 0.0           | 0.3           | 0.0           | 0.3           | 0.0           | 0.3           | 0.0           | 0.1           | 0.4           | 0.1           | 0.1           | 0.0           | 0.0           | 0.0           | 0.1           | 0.0           | 0.1           | 0.4           | 0.3           | 0.1           | 0.4           | 0.0           | 0.0           | 0.0           |
| General trust: Govt                          | 0.1           | -             | 0.3           | 0.0           | 0.1           | 0.0           | 0.9           | 0.1           | 0.1           | 0.3           | 0.3           | 0.1           | 0.0           | 0.0           | 0.0           | 0.1           | 0.0           | 0.0           | 0.0           | 0.2           | 0.0           | 0.2           | 0.0           | 0.0           | 0.1           |
| COVID trust:<br>Politicians                  | 3.4           | -             | 1.7           | 1.3           | 0.0           | 0.0           | 10.0          | 0.4           | 0.1           | 4.8           | 0.3           | 0.1           | 2.3           | 0.1           | 0.0           | 0.0           | 0.0           | 0.1           | 0.2           | 0.1           | 0.0           | 0.2           | 0.0           | 0.1           | 0.0           |
| COVID Trust:<br>National sci/med<br>advisors | 3.4           | -             | 1.7           | 1.3           | 0.1           | 0.0           | 10.0          | 0.3           | 0.0           | 4.8           | 0.3           | 0.1           | 2.3           | 0.0           | 0.0           | 0.0           | 0.0           | 0.1           | 0.2           | 0.1           | 0.0           | 0.1           | 0.0           | 0.3           | -             |
| COVID Trust:<br>Independent scientists       | 3.4           | -             | 1.7           | 1.6           | 0.1           | 0.0           | 10.1          | 0.3           | 0.0           | 4.8           | 0.3           | 0.0           | 2.3           | 0.0           | 0.0           | 0.0           | 0.0           | 0.1           | -             | 0.2           | 0.0           | 0.1           | 0.1           | 0.3           | -             |
| COVID Trust: WHO                             | 3.4           | -             | 2.0           | 1.4           | 0.0           | 0.0           | 10.0          | 0.6           | 0.1           | 4.9           | 0.3           | 0.0           | 2.3           | 0.0           | 0.0           | 0.1           | 0.0           | 0.2           | 0.2           | 0.2           | 0.0           | 0.1           | 0.1           | 0.3           | -             |
| Personal efficacy                            | 3.7           | -             | 2.0           | 1.3           | 0.0           | 0.0           | 10.3          | 0.6           | 0.1           | 4.8           | 0.3           | 0.0           | 2.4           | 0.0           | 0.1           | 0.0           | 0.2           | 0.2           | 0.4           | 0.3           | 0.1           | 0.2           | 0.0           | 0.3           | 0.0           |
| Govt efficacy                                | 3.6           | -             | 2.0           | 1.4           | 0.3           | 0.0           | 10.4          | 0.4           | 0.1           | 4.8           | 0.6           | 0.0           | 2.4           | 0.0           | 0.0           | 0.0           | 0.1           | 0.2           | 0.2           | 0.3           | 0.0           | 0.1           | 0.0           | 0.3           | 0.1           |
| Perceived infection<br>risk                  | 1.4           | 0.3           | 1.0           | 0.9           | 0.0           | 0.0           | 3.0           | 0.0           | 0.0           | 1.7           | 0.1           | 0.0           | 1.1           | 0.0           | 0.0           | 0.0           | 0.0           | 0.1           | 0.4           | 0.2           | 0.2           | 0.0           | 0.1           | 0.4           | 0.0           |
| Worry about COVID                            | 1.0           | 0.0           | 0.6           | 0.6           | 0.0           | 0.0           | 2.4           | 0.1           | 0.3           | 1.4           | 0.0           | 0.0           | 0.7           | 0.0           | 0.0           | 0.0           | 0.0           | 0.1           | 0.2           | 0.3           | 0.0           | 0.1           | 0.1           | 0.1           | 0.0           |
| Vaccine acceptance                           | 4.0           | 0.1           | 1.9           | 1.4           | 0.1           | 0.0           | 11.4          | 0.1           | 0.1           | 5.8           | 0.3           | 0.4           | 2.4           | 0.1           | 0.0           | 0.0           | 0.0           | 0.2           | 0.2           | 0.3           | 0.1           | 0.1           | 0.1           | 0.1           | 0.0           |
| Vaccine recommend                            | 4.1           | 0.1           | 1.9           | 1.6           | 0.1           | 0.0           | 11.4          | 0.1           | 0.1           | 6.3           | 0.6           | 0.4           | 2.4           | 0.1           | 0.0           | 0.1           | 0.1           | 0.2           | 0.2           | 0.4           | 0.1           | 0.1           | 0.1           | 0.1           | 0.0           |
| Vaccine attitudes                            | -             | -             | -             | -             | -             | -             | -             | -             | -             | -             | -             | -             | -             | -             | -             | -             | 0.3           | -             | -             | -             | 0.2           | 0.3           | -             | -             | -             |

‘-’ indicates variable not included in survey. For space, samples are defined by their two character ISO country code and a letter denoting participant source (B, BVA; D, Dynata; P, Prolific; R, Respondi). Missing gender includes ‘Other’ and ‘prefer’ not to say’ responses (total  $n = 35$ ) and missing age includes values outside the range of 18-100 (total  $n = 46$ )

Table S3

Gender and age distribution of those participants who answered the vaccine acceptance item (% of each sample; continued on following page)

| Gender  | Age bracket | AU_D1 | CN_R1 | DE_R1 | ES_R1 | ES_R2 | FR_B1 | IT_R1 | JP_R1 | KR_R1 | MX_R1 | MX_R2 | SE_R1 | SE_R2 |
|---------|-------------|-------|-------|-------|-------|-------|-------|-------|-------|-------|-------|-------|-------|-------|
| Male    | 18-24       | 6.0   | 5.7   | 5.2   | 4.5   | 4.7   | 1.2   | 4.8   | 4.9   | 5.6   | 9.8   | 9.9   | 5.3   | 5.7   |
|         | 24-34       | 8.3   | 10.9  | 8.7   | 7.4   | 7.6   | 6.2   | 8.4   | 7.3   | 8.6   | 12.4  | 11.8  | 10.5  | 10.5  |
|         | 35-44       | 8.6   | 9.3   | 8.6   | 10.4  | 10.6  | 7.6   | 9.4   | 8.7   | 9.6   | 10.0  | 10.7  | 9.2   | 9.0   |
|         | 45-54       | 8.2   | 11.3  | 10.0  | 10.9  | 10.7  | 10.2  | 10.7  | 10.2  | 11.2  | 8.9   | 8.3   | 9.8   | 9.5   |
|         | 55-64       | 7.6   | 8.2   | 10.5  | 9.0   | 8.9   | 8.6   | 8.6   | 8.2   | 10.2  | 5.8   | 5.4   | 8.6   | 8.8   |
|         | 65+         | 9.2   | 5.7   | 7.7   | 7.0   | 7.2   | 13.8  | 6.8   | 9.7   | 6.0   | 3.2   | 3.0   | 8.1   | 7.8   |
|         | Missing     | 0.0   | 0.0   | 0.0   | 0.0   | 0.0   | 0.0   | 0.0   | 0.0   | 0.0   | 0.0   | 0.0   | 0.0   | 0.0   |
| Female  | 18-24       | 5.7   | 5.4   | 5.2   | 4.5   | 4.7   | 8.5   | 4.8   | 5.0   | 5.3   | 8.9   | 10.0  | 5.0   | 5.5   |
|         | 24-34       | 9.5   | 10.4  | 8.4   | 7.8   | 7.7   | 8.7   | 8.4   | 7.6   | 8.2   | 12.9  | 12.3  | 10.3  | 10.0  |
|         | 35-44       | 10.1  | 8.9   | 8.4   | 10.9  | 10.7  | 8.4   | 10.5  | 9.2   | 9.2   | 12.1  | 11.3  | 8.9   | 8.5   |
|         | 45-54       | 9.4   | 10.9  | 9.5   | 10.9  | 11.0  | 9.5   | 12.4  | 10.5  | 10.7  | 8.7   | 8.6   | 9.4   | 9.3   |
|         | 55-64       | 7.9   | 7.9   | 9.9   | 9.3   | 8.9   | 6.7   | 7.6   | 8.6   | 9.7   | 5.4   | 5.7   | 8.4   | 8.3   |
|         | 65+         | 9.5   | 5.4   | 7.7   | 7.5   | 7.3   | 10.7  | 7.7   | 10.2  | 5.9   | 2.0   | 2.9   | 6.6   | 7.2   |
| Missing | 18-24       | 0.0   | 0.0   | 0.0   | 0.0   | 0.0   | 0.0   | 0.0   | 0.0   | 0.0   | 0.0   | 0.0   | 0.0   | 0.0   |
|         | 24-34       | 0.0   | 0.0   | 0.0   | 0.0   | 0.0   | 0.0   | 0.0   | 0.0   | 0.0   | 0.0   | 0.0   | 0.0   | 0.0   |
|         | 35-44       | 0.0   | 0.0   | 0.0   | 0.0   | 0.0   | 0.0   | 0.0   | 0.0   | 0.0   | 0.0   | 0.0   | 0.0   | 0.0   |
|         | 45-54       | 0.0   | 0.0   | 0.0   | 0.0   | 0.0   | 0.0   | 0.0   | 0.0   | 0.0   | 0.0   | 0.0   | 0.0   | 0.0   |
|         | 55-64       | 0.0   | 0.0   | 0.0   | 0.0   | 0.0   | 0.0   | 0.0   | 0.0   | 0.0   | 0.0   | 0.0   | 0.0   | 0.0   |
|         | 65+         | 0.0   | 0.0   | 0.0   | 0.0   | 0.0   | 0.0   | 0.0   | 0.0   | 0.0   | 0.0   | 0.0   | 0.0   | 0.0   |

For space, samples are defined by their two character ISO country code and a letter denoting participant source (B, BVA; D, Dynata; P, Prolific; R, Respondi). 'Missing' gender includes responses 'Other' and 'Prefer not to say' - only included in Prolific samples.

Table S3 (continued)

Gender and age distribution of those participants who answered the vaccine acceptance item (% of each sample)

| Gender  | Age bracket | UK_P1 | UK_P3 | UK_P4 | UK_P5 | UK_R2 | UK_R3 | UK_R4 | UK_R5 | UK_R6 | US_P1 | US_R2 | US_R3 |
|---------|-------------|-------|-------|-------|-------|-------|-------|-------|-------|-------|-------|-------|-------|
| Male    | 18-24       | 5.6   | 7.2   | 7.1   | 11.7  | 5.8   | 4.2   | 5.8   | 5.9   | 5.5   | 5.9   | 6.3   | 3.4   |
|         | 24-34       | 10.0  | 8.8   | 9.4   | 15.1  | 8.7   | 8.0   | 8.8   | 8.9   | 7.8   | 10.1  | 9.6   | 12.5  |
|         | 35-44       | 8.3   | 9.3   | 9.4   | 7.7   | 9.2   | 9.4   | 9.3   | 9.3   | 8.7   | 9.0   | 8.7   | 12.0  |
|         | 45-54       | 8.5   | 8.6   | 8.5   | 6.4   | 9.2   | 9.6   | 9.2   | 9.2   | 10.2  | 9.0   | 8.7   | 5.7   |
|         | 55-64       | 11.7  | 9.3   | 8.2   | 5.7   | 8.3   | 8.4   | 8.2   | 8.2   | 8.4   | 8.6   | 8.9   | 9.2   |
|         | 65+         | 4.7   | 5.5   | 4.6   | 1.7   | 6.7   | 7.0   | 7.0   | 7.0   | 7.3   | 6.4   | 6.7   | 6.4   |
|         | Missing     | 0.0   | 0.2   | 0.0   | 0.0   | 0.0   | 0.0   | 0.0   | 0.0   | 0.0   | 0.0   | 0.0   | 0.0   |
| Female  | 18-24       | 5.6   | 5.1   | 6.1   | 10.9  | 6.3   | 7.0   | 6.3   | 6.2   | 5.7   | 4.9   | 6.6   | 5.3   |
|         | 24-34       | 8.8   | 9.8   | 9.1   | 11.5  | 9.5   | 10.0  | 9.6   | 9.5   | 8.4   | 11.3  | 10.0  | 11.3  |
|         | 35-44       | 9.3   | 9.9   | 8.9   | 8.8   | 10.0  | 10.2  | 10.0  | 9.9   | 9.5   | 7.6   | 9.2   | 9.2   |
|         | 45-54       | 8.3   | 7.7   | 10.2  | 8.6   | 10.0  | 10.2  | 9.8   | 9.8   | 10.6  | 8.7   | 9.0   | 8.1   |
|         | 55-64       | 12.9  | 13.1  | 11.8  | 8.8   | 8.9   | 8.8   | 8.6   | 8.7   | 9.5   | 11.7  | 9.3   | 10.3  |
|         | 65+         | 6.1   | 5.1   | 6.3   | 2.7   | 7.2   | 7.0   | 7.5   | 7.5   | 8.4   | 6.6   | 7.0   | 6.3   |
| Missing | 18-24       | 0.0   | 0.1   | 0.2   | 0.4   | 0.0   | 0.0   | 0.0   | 0.0   | 0.0   | 0.3   | 0.0   | 0.0   |
|         | 24-34       | 0.3   | 0.1   | 0.2   | 0.1   | 0.0   | 0.0   | 0.0   | 0.0   | 0.0   | 0.0   | 0.0   | 0.1   |
|         | 35-44       | 0.0   | 0.0   | 0.0   | 0.1   | 0.0   | 0.0   | 0.0   | 0.0   | 0.0   | 0.1   | 0.0   | 0.0   |
|         | 45-54       | 0.0   | 0.1   | 0.0   | 0.1   | 0.0   | 0.0   | 0.0   | 0.0   | 0.0   | 0.0   | 0.0   | 0.0   |
|         | 55-64       | 0.1   | 0.0   | 0.1   | 0.0   | 0.0   | 0.0   | 0.0   | 0.0   | 0.0   | 0.0   | 0.0   | 0.0   |
|         | 65+         | 0.0   | 0.1   | 0.0   | 0.0   | 0.0   | 0.0   | 0.0   | 0.0   | 0.0   | 0.0   | 0.0   | 0.0   |

For space, samples are defined by their two character ISO country code and a letter denoting participant source (B, BVA; D, Dynata; P, Prolific; R, Respondi). 'Missing' gender includes responses 'Other' and 'Prefer not to say' - only included in Prolific samples.

Table S4

Descriptive statistics for all samples (Mean (SD)) (continued on following page)

|                                          | ALL              | AU_D<br>(Mar)    | CN_R<br>(Apr)    | DE_R<br>(Mar)    | ES_R<br>(Mar)    | ES_R<br>(May)    | FR_B<br>(Apr)               | IT_R<br>(Mar)    | JP_R<br>(Apr)    | KR_R<br>(Apr)    | MX_R<br>(Mar)    | MX_R<br>(May)    | SE_R<br>(Mar)    | SE_R<br>(Apr)    |
|------------------------------------------|------------------|------------------|------------------|------------------|------------------|------------------|-----------------------------|------------------|------------------|------------------|------------------|------------------|------------------|------------------|
| Age                                      | 45.06<br>(16.02) | 46.30<br>(16.44) | 43.21<br>(14.26) | 46.71<br>(15.93) | 46.68<br>(14.99) | 46.00<br>(15.03) | 48.79<br>(16.53)            | 45.91<br>(14.81) | 48.08<br>(16.35) | 45.34<br>(15.51) | 38.69<br>(13.96) | 38.61<br>(14.21) | 45.49<br>(16.02) | 45.49<br>(16.54) |
| Gender (Female)                          | 0.51<br>(0.50)   | 0.51<br>(0.50)   | 0.49<br>(0.50)   | 0.50<br>(0.50)   | 0.51<br>(0.50)   | 0.50<br>(0.50)   | 0.48<br>(0.50)              | 0.50<br>(0.50)   | 0.51<br>(0.50)   | 0.49<br>(0.50)   | 0.50<br>(0.50)   | 0.51<br>(0.50)   | 0.49<br>(0.50)   | 0.49<br>(0.50)   |
| Education                                | 3.42<br>(1.13)   | 3.17<br>(1.12)   | 3.64<br>(0.88)   | 3.07<br>(1.19)   | 3.59<br>(1.08)   | 3.60<br>(1.07)   | 5.00 <sup>a</sup><br>(1.12) | 3.51<br>(1.23)   | 3.56<br>(0.81)   | 3.76<br>(0.79)   | 3.55<br>(0.94)   | 3.74<br>(0.88)   | 3.30<br>(1.06)   | 3.34<br>(1.01)   |
| Numeracy                                 | 2.66<br>(1.11)   | 2.41<br>(1.06)   | 2.83<br>(1.25)   | 2.53<br>(1.12)   | 2.39<br>(1.03)   | 2.42<br>(0.97)   | 2.18<br>(0.70)              | 2.13<br>(0.71)   | 2.77<br>(1.25)   | 2.60<br>(1.06)   | 2.16<br>(0.90)   | 2.31<br>(0.95)   | 2.52<br>(1.23)   | 2.57<br>(1.21)   |
| Politics (Conservative)                  | 3.74<br>(1.41)   | 3.83<br>(1.30)   | -                | 3.79<br>(1.19)   | 3.50<br>(1.43)   | 3.44<br>(1.50)   | -                           | 3.87<br>(1.45)   | 4.09<br>(1.09)   | 3.88<br>(1.20)   | 3.65<br>(1.31)   | 3.57<br>(1.33)   | 3.92<br>(1.59)   | 3.88<br>(1.61)   |
| Prosociality                             | 5.21<br>(1.36)   | 5.23<br>(1.36)   | 5.54<br>(1.19)   | 4.97<br>(1.42)   | 5.74<br>(1.21)   | 5.35<br>(1.34)   | 5.23<br>(1.41)              | 5.76<br>(1.38)   | 4.74<br>(1.42)   | 4.40<br>(1.31)   | 5.34<br>(1.61)   | 5.26<br>(1.53)   | 4.87<br>(1.43)   | 4.63<br>(1.48)   |
| General social trust                     | 3.66<br>(1.71)   | 3.95<br>(1.67)   | 4.96<br>(1.67)   | 3.61<br>(1.65)   | 3.47<br>(1.87)   | 3.29<br>(1.77)   | 2.98<br>(1.62)              | 3.70<br>(1.61)   | 3.85<br>(1.48)   | 3.97<br>(1.50)   | 2.81<br>(1.84)   | 2.94<br>(1.84)   | 3.73<br>(1.73)   | 3.85<br>(1.73)   |
| General trust: Experts                   | 3.97<br>(0.77)   | 3.97<br>(0.79)   | 4.26<br>(0.61)   | 3.90<br>(0.74)   | 4.19<br>(0.72)   | 4.09<br>(0.76)   | 3.76<br>(0.81)              | 4.02<br>(0.74)   | 3.51<br>(0.72)   | 3.74<br>(0.68)   | 4.05<br>(0.85)   | 4.10<br>(0.83)   | 3.90<br>(0.75)   | 3.85<br>(0.75)   |
| General trust: Govt                      | 2.64<br>(0.91)   | 2.96<br>(0.93)   | -                | 3.14<br>(0.92)   | 2.75<br>(0.94)   | 2.54<br>(0.89)   | 2.48<br>(0.90)              | 2.89<br>(0.91)   | 2.46<br>(0.84)   | 2.65<br>(0.81)   | 2.28<br>(1.01)   | 2.35<br>(1.02)   | 3.04<br>(1.00)   | 3.00<br>(1.01)   |
| COVID trust: Politicians                 | 3.48<br>(1.87)   | 4.44<br>(1.75)   | -                | 4.80<br>(1.65)   | 4.01<br>(1.88)   | 3.45<br>(1.91)   | 3.33<br>(1.78)              | 4.35<br>(1.74)   | 3.03<br>(1.60)   | 4.24<br>(1.63)   | 3.22<br>(1.99)   | 3.51<br>(1.96)   | 4.13<br>(1.78)   | 4.24<br>(1.83)   |
| COVID Trust: National sci/med advisors   | 4.91<br>(1.60)   | 5.34<br>(1.41)   | -                | 5.40<br>(1.43)   | 5.45<br>(1.39)   | 4.92<br>(1.65)   | 4.46<br>(1.73)              | 5.42<br>(1.40)   | 3.90<br>(1.51)   | 5.15<br>(1.37)   | 5.18<br>(1.69)   | 5.28<br>(1.60)   | 4.78<br>(1.67)   | 4.93<br>(1.66)   |
| COVID Trust: Independent scientists      | 4.66<br>(1.55)   | 4.77<br>(1.49)   | -                | 5.11<br>(1.38)   | 5.15<br>(1.39)   | 4.83<br>(1.55)   | 4.62<br>(1.52)              | 4.80<br>(1.45)   | 3.73<br>(1.51)   | 5.03<br>(1.26)   | 5.02<br>(1.68)   | 4.91<br>(1.65)   | 4.66<br>(1.52)   | 4.55<br>(1.48)   |
| COVID Trust: WHO                         | 4.84<br>(1.68)   | 5.19<br>(1.55)   | -                | 5.16<br>(1.52)   | 5.46<br>(1.42)   | 4.88<br>(1.62)   | 4.80<br>(1.61)              | 5.25<br>(1.48)   | 3.12<br>(1.55)   | 3.96<br>(1.51)   | 5.80<br>(1.45)   | 5.58<br>(1.62)   | 5.05<br>(1.45)   | 4.81<br>(1.55)   |
| Personal efficacy                        | 5.22<br>(1.48)   | 5.14<br>(1.45)   | -                | 5.24<br>(1.41)   | 5.31<br>(1.47)   | 5.14<br>(1.47)   | 5.20<br>(1.47)              | 5.31<br>(1.46)   | 4.26<br>(1.42)   | 5.42<br>(1.24)   | 5.36<br>(1.66)   | 5.56<br>(1.53)   | 5.20<br>(1.50)   | 5.26<br>(1.45)   |
| Govt efficacy                            | 3.86<br>(1.78)   | 4.48<br>(1.63)   | -                | 4.68<br>(1.47)   | 4.21<br>(1.77)   | 4.11<br>(1.83)   | 4.22<br>(1.68)              | 4.60<br>(1.60)   | 3.21<br>(1.52)   | 5.08<br>(1.52)   | 3.82<br>(2.06)   | 4.39<br>(1.86)   | 4.30<br>(1.73)   | 4.41<br>(1.67)   |
| Perceived infection risk                 | 4.17<br>(1.32)   | 4.16<br>(1.40)   | 3.26<br>(1.37)   | 4.13<br>(1.34)   | 4.46<br>(1.23)   | 4.38<br>(1.26)   | 4.19<br>(1.24)              | 3.93<br>(1.30)   | 4.48<br>(1.20)   | 4.37<br>(1.22)   | 4.16<br>(1.47)   | 4.29<br>(1.43)   | 4.30<br>(1.37)   | 4.37<br>(1.29)   |
| Worry about COVID                        | 5.56<br>(1.52)   | 5.56<br>(1.51)   | 5.37<br>(1.57)   | 5.66<br>(1.49)   | 6.25<br>(1.17)   | 6.11<br>(1.26)   | 5.63<br>(1.43)              | 6.08<br>(1.27)   | 5.83<br>(1.28)   | 5.59<br>(1.29)   | 5.92<br>(1.46)   | 6.06<br>(1.35)   | 5.27<br>(1.55)   | 4.98<br>(1.66)   |
| Vaccine – acceptance                     | 0.76<br>(0.43)   | 0.83<br>(0.38)   | 0.86<br>(0.35)   | 0.81<br>(0.39)   | 0.84<br>(0.37)   | 0.80<br>(0.40)   | 0.70<br>(0.46)              | 0.85<br>(0.35)   | 0.74<br>(0.44)   | 0.86<br>(0.35)   | 0.88<br>(0.32)   | 0.74<br>(0.44)   | 0.66<br>(0.47)   | 0.63<br>(0.48)   |
| Vaccine – recommend to vulnerable others | 0.82<br>(0.38)   | 0.89<br>(0.32)   | 0.87<br>(0.33)   | 0.89<br>(0.31)   | 0.90<br>(0.30)   | 0.82<br>(0.38)   | 0.81<br>(0.40)              | 0.88<br>(0.32)   | 0.80<br>(0.40)   | 0.88<br>(0.32)   | 0.90<br>(0.30)   | 0.76<br>(0.43)   | 0.77<br>(0.42)   | 0.74<br>(0.44)   |
| General vaccine attitudes                | 4.05<br>(1.11)   | -                | -                | -                | -                | -                | -                           | -                | -                | -                | -                | -                | -                | -                |

<sup>a</sup> Education item in France differed from other surveys – see Table S1.



Table S4 (continued)

Descriptive statistics for all samples (Mean (SD))

|                                          | UK_P<br>(Mar)    | UK_P<br>(May)    | UK_P<br>(Jul)    | UK_P<br>(Sep)    | UK_R<br>(May)    | UK_R<br>(Jun)    | UK_R<br>(Jul)    | UK_R<br>(Sep)    | UK_R<br>(Oct)    | US_P<br>(Mar)    | US_R<br>(May)    | US_R<br>(Sep)    |
|------------------------------------------|------------------|------------------|------------------|------------------|------------------|------------------|------------------|------------------|------------------|------------------|------------------|------------------|
| Age                                      | 45.63<br>(15.69) | 44.72<br>(15.66) | 44.54<br>(15.65) | 38.18<br>(14.98) | 45.72<br>(15.94) | 45.90<br>(15.87) | 45.42<br>(16.60) | 45.47<br>(16.09) | 46.74<br>(16.04) | 45.14<br>(15.84) | 45.03<br>(16.09) | 44.76<br>(15.60) |
| Gender (Female)                          | 0.51<br>(0.50)   | 0.51<br>(0.50)   | 0.53<br>(0.50)   | 0.52<br>(0.50)   | 0.52<br>(0.50)   | 0.53<br>(0.50)   | 0.52<br>(0.50)   | 0.52<br>(0.50)   | 0.52<br>(0.50)   | 0.51<br>(0.50)   | 0.51<br>(0.50)   | 0.51<br>(0.50)   |
| Education                                | 3.45<br>(1.17)   | 3.50<br>(1.14)   | 3.58<br>(1.14)   | 3.54<br>(1.10)   | 3.17<br>(1.27)   | -                | 3.20<br>(1.23)   | 3.15<br>(1.28)   | 3.10<br>(1.23)   | 3.87<br>(0.88)   | 3.70<br>(0.90)   | -                |
| Numeracy                                 | 3.22<br>(1.17)   | 3.23<br>(1.14)   | 3.04<br>(1.06)   | 3.24<br>(1.15)   | 2.64<br>(1.14)   | 2.74<br>(1.10)   | 2.61<br>(1.07)   | 2.60<br>(1.07)   | 2.78<br>(1.11)   | 3.14<br>(1.13)   | 2.76<br>(1.14)   | 2.58<br>(1.12)   |
| Politics (Conservative)                  | 3.69<br>(1.43)   | 3.67<br>(1.39)   | 3.58<br>(1.36)   | 3.37<br>(1.36)   | 3.90<br>(1.35)   | 3.89<br>(1.19)   | 3.90<br>(1.33)   | 3.84<br>(1.36)   | 3.83<br>(1.32)   | 3.22<br>(1.65)   | 3.92<br>(1.69)   | 4.07<br>(1.65)   |
| Prosociality                             | 5.50<br>(1.07)   | 5.36<br>(1.19)   | 5.32<br>(1.16)   | 5.42<br>(1.17)   | 5.12<br>(1.33)   | 5.25<br>(1.29)   | 5.03<br>(1.29)   | 5.08<br>(1.39)   | 5.38<br>(1.36)   | 5.43<br>(1.28)   | 5.05<br>(1.36)   | 5.02<br>(1.44)   |
| General social trust                     | 4.04<br>(1.59)   | 4.12<br>(1.55)   | 4.11<br>(1.55)   | 3.69<br>(1.56)   | 3.74<br>(1.71)   | 3.58<br>(1.70)   | 3.86<br>(1.59)   | 3.68<br>(1.68)   | 3.66<br>(1.64)   | 4.01<br>(1.68)   | 3.79<br>(1.73)   | 3.47<br>(1.84)   |
| General trust: Experts                   | 4.24<br>(0.66)   | 4.11<br>(0.63)   | 4.14<br>(0.66)   | 4.17<br>(0.68)   | 3.89<br>(0.79)   | 3.88<br>(0.81)   | 3.92<br>(0.76)   | 3.90<br>(0.78)   | 3.92<br>(0.77)   | 4.22<br>(0.73)   | 3.96<br>(0.77)   | 3.89<br>(0.83)   |
| General trust: Govt                      | 2.82<br>(0.85)   | 2.80<br>(0.82)   | 2.60<br>(0.82)   | 2.44<br>(0.81)   | 2.82<br>(0.87)   | 2.64<br>(0.87)   | 2.70<br>(0.88)   | 2.60<br>(0.90)   | 2.55<br>(0.86)   | 2.55<br>(0.79)   | 2.68<br>(0.83)   | 2.52<br>(0.88)   |
| COVID trust: Politicians                 | 3.81<br>(1.78)   | 3.80<br>(1.81)   | 3.16<br>(1.80)   | 2.57<br>(1.65)   | 4.00<br>(1.86)   | 3.38<br>(1.70)   | 3.60<br>(1.83)   | 3.23<br>(1.86)   | 3.04<br>(1.79)   | 3.06<br>(1.74)   | 3.11<br>(1.77)   | 2.93<br>(1.81)   |
| COVID Trust: National sci/med advisors   | 5.27<br>(1.47)   | 5.13<br>(1.41)   | 5.12<br>(1.47)   | 4.88<br>(1.58)   | 4.94<br>(1.57)   | 4.58<br>(1.51)   | 4.88<br>(1.53)   | 4.66<br>(1.61)   | 4.60<br>(1.66)   | 5.46<br>(1.41)   | 5.15<br>(1.55)   | -                |
| COVID Trust: Independent scientists      | 4.88<br>(1.48)   | 4.59<br>(1.44)   | 4.74<br>(1.48)   | 4.77<br>(1.60)   | 4.46<br>(1.52)   | -                | 4.54<br>(1.52)   | 4.40<br>(1.61)   | 4.28<br>(1.63)   | 5.16<br>(1.48)   | 4.72<br>(1.60)   | -                |
| COVID Trust: WHO                         | 5.59<br>(1.40)   | 4.97<br>(1.55)   | 5.02<br>(1.62)   | 4.77<br>(1.70)   | 4.76<br>(1.69)   | 4.46<br>(1.69)   | 4.72<br>(1.66)   | 4.50<br>(1.69)   | 4.44<br>(1.71)   | 5.62<br>(1.55)   | 4.57<br>(1.90)   | -                |
| Personal efficacy                        | 5.04<br>(1.39)   | 5.59<br>(1.26)   | 5.47<br>(1.35)   | 5.12<br>(1.48)   | 5.36<br>(1.48)   | 5.13<br>(1.45)   | 5.30<br>(1.45)   | 5.09<br>(1.52)   | 5.03<br>(1.52)   | 5.25<br>(1.45)   | 5.32<br>(1.47)   | 5.14<br>(1.57)   |
| Govt efficacy                            | 3.86<br>(1.75)   | 3.85<br>(1.70)   | 3.48<br>(1.72)   | 3.03<br>(1.62)   | 4.13<br>(1.74)   | 3.66<br>(1.61)   | 3.88<br>(1.75)   | 3.58<br>(1.73)   | 3.36<br>(1.70)   | 3.28<br>(1.80)   | 3.76<br>(1.76)   | 3.25<br>(1.86)   |
| Perceived infection risk                 | 4.89<br>(1.32)   | 4.26<br>(1.24)   | 3.96<br>(1.24)   | 4.26<br>(1.30)   | 4.14<br>(1.22)   | 3.94<br>(1.25)   | 3.86<br>(1.25)   | 4.13<br>(1.28)   | 4.27<br>(1.24)   | 3.98<br>(1.52)   | 3.91<br>(1.38)   | 4.11<br>(1.38)   |
| Worry about COVID                        | 5.80<br>(1.36)   | 5.72<br>(1.40)   | 5.28<br>(1.52)   | 5.36<br>(1.58)   | 5.60<br>(1.51)   | 5.34<br>(1.57)   | 5.30<br>(1.60)   | 5.39<br>(1.61)   | 5.39<br>(1.63)   | 5.49<br>(1.58)   | 5.58<br>(1.60)   | 5.43<br>(1.72)   |
| Vaccine – acceptance                     | 0.80<br>(0.40)   | 0.80<br>(0.40)   | 0.79<br>(0.41)   | 0.73<br>(0.44)   | 0.79<br>(0.41)   | 0.79<br>(0.41)   | 0.80<br>(0.40)   | 0.76<br>(0.43)   | 0.72<br>(0.45)   | 0.76<br>(0.43)   | 0.75<br>(0.44)   | 0.63<br>(0.48)   |
| Vaccine – recommend to vulnerable others | 0.92<br>(0.28)   | 0.87<br>(0.34)   | 0.85<br>(0.36)   | 0.80<br>(0.40)   | 0.84<br>(0.36)   | 0.83<br>(0.38)   | 0.84<br>(0.36)   | 0.80<br>(0.40)   | 0.76<br>(0.43)   | 0.86<br>(0.35)   | 0.80<br>(0.40)   | 0.68<br>(0.47)   |
| General vaccine attitudes                | -                | -                | -                | 4.21<br>(1.10)   | -                | -                | -                | 3.90<br>(1.14)   | 4.05<br>(1.06)   | -                | -                | -                |

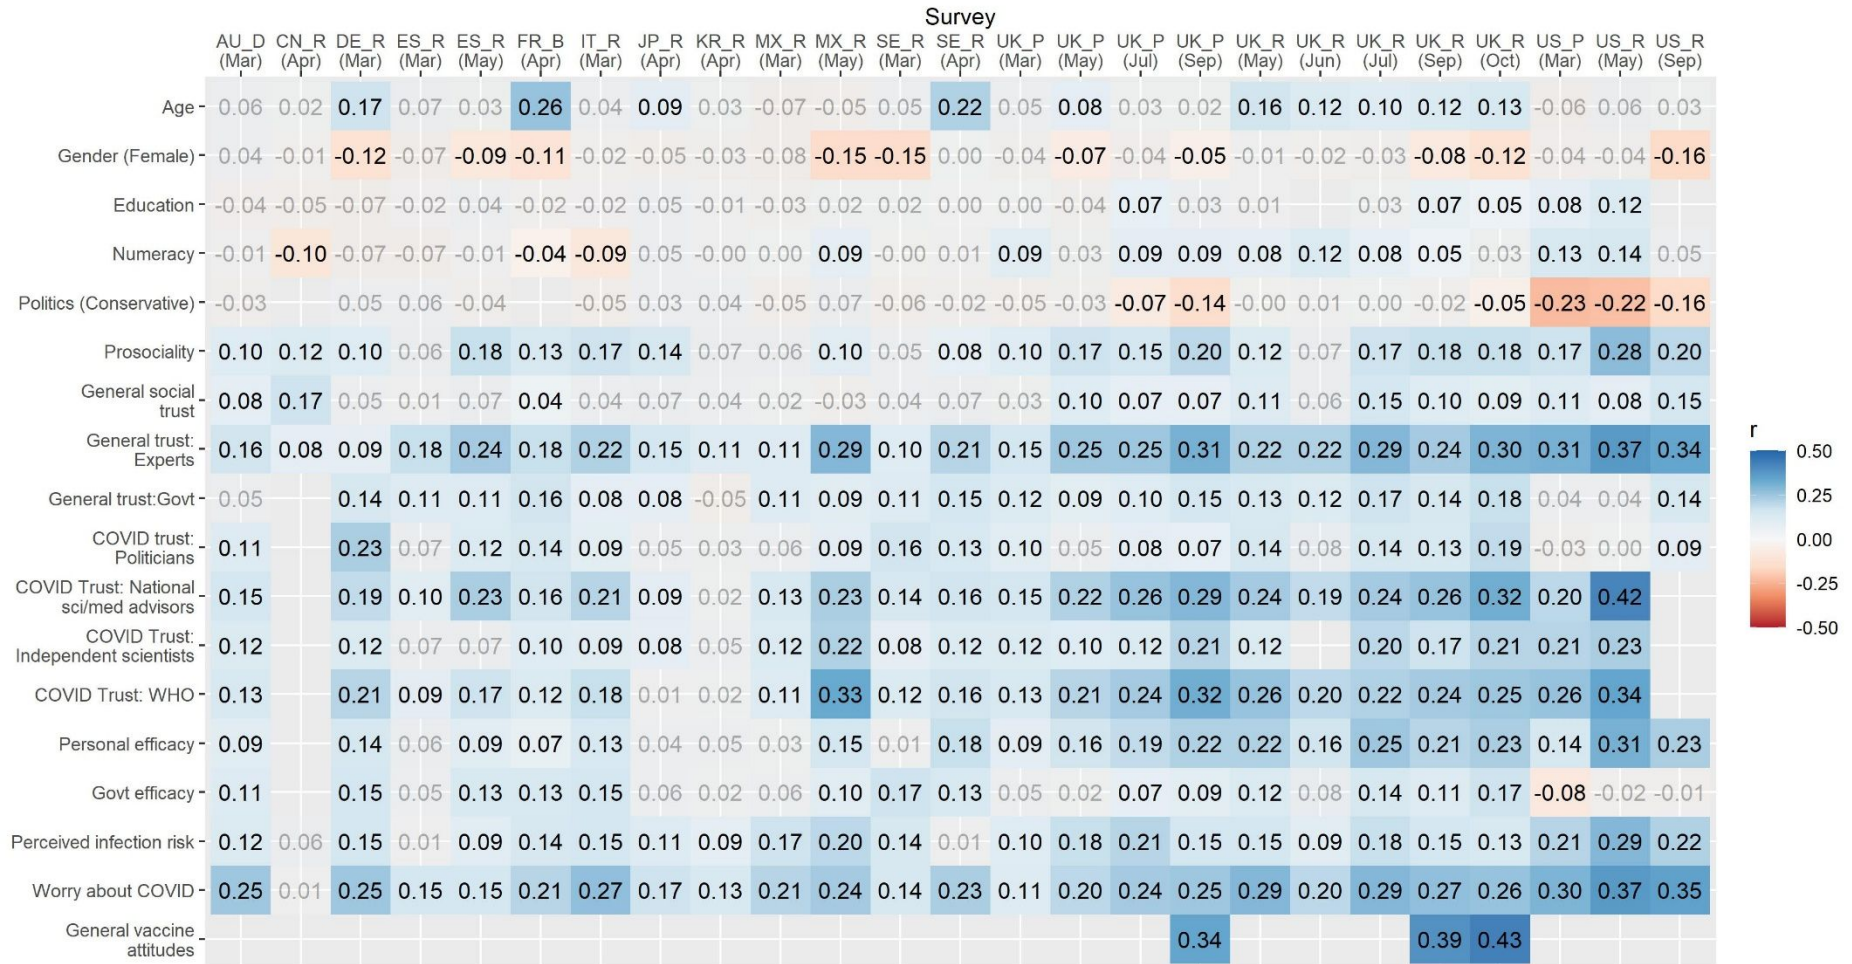

Figure S1. Point biserial correlations between predictors and vaccine acceptance across all samples. Greyed values are non-significant ( $p > .05$ ). Blank spaces indicate predictors which were not included in a given survey

Table S5

Full logistic regression results from model predicting vaccine acceptance (continued on following page)

|                                        | ALL           | ALL (-UK)     | AU_D (Mar)    | DE_R (Mar)     | ES_R (Mar)     | ES_R (May)     | FR_B (Apr)    | IT_R (Mar)     | JP_R (Apr)    | KR_R (Apr)     | MX_R (Mar)     | MX_R (May)    | SE_R (Mar)    | SE_R (Apr)    |
|----------------------------------------|---------------|---------------|---------------|----------------|----------------|----------------|---------------|----------------|---------------|----------------|----------------|---------------|---------------|---------------|
|                                        | OR            | OR            | OR            | OR             | OR             | OR             | OR            | OR             | OR            | OR             | OR             | OR            | OR            | OR            |
| (Intercept)                            | 5.22 ***      | 5.05 ***      | 5.59 ***      | 9.30 ***       | 8.06 ***       | 7.35 ***       | 3.35 ***      | 11.64 ***      | 3.70 ***      | 7.89 ***       | 14.91 ***      | 5.36 ***      | 3.17 ***      | 2.22 ***      |
|                                        | [4.92 – 5.53] | [4.63 – 5.53] | [4.08 – 7.83] | [6.46 – 13.85] | [5.71 – 11.73] | [5.28 – 10.50] | [2.93 – 3.84] | [7.49 – 19.01] | [2.78 – 4.99] | [5.66 – 11.31] | [9.54 – 24.65] | [3.94 – 7.44] | [2.45 – 4.15] | [1.72 – 2.88] |
| Age                                    | 1.19 ***      | 1.08 **       | 1.12          | 1.63 ***       | 1.11           | 1              | 1.68 ***      | 1.08           | 1.23          | 0.97           | 0.75 *         | 0.87          | 1.12          | 1.44 ***      |
|                                        | [1.14 – 1.23] | [1.02 – 1.15] | [0.88 – 1.42] | [1.29 – 2.09]  | [0.88 – 1.40]  | [0.80 – 1.25]  | [1.53 – 1.84] | [0.80 – 1.44]  | [1.00 – 1.52] | [0.77 – 1.23]  | [0.57 – 0.98]  | [0.71 – 1.06] | [0.93 – 1.34] | [1.19 – 1.76] |
| Gender (Female) <sup>a</sup>           | 0.59 ***      | 0.61 ***      | 1.2           | 0.38 ***       | 0.53 **        | 0.47 ***       | 0.65 ***      | 0.59           | 0.76          | 0.75           | 0.50 *         | 0.43 ***      | 0.43 ***      | 0.71          |
|                                        | [0.55 – 0.64] | [0.55 – 0.69] | [0.76 – 1.88] | [0.23 – 0.60]  | [0.33 – 0.84]  | [0.30 – 0.72]  | [0.54 – 0.77] | [0.34 – 1.03]  | [0.50 – 1.13] | [0.48 – 1.19]  | [0.28 – 0.88]  | [0.28 – 0.64] | [0.30 – 0.63] | [0.49 – 1.03] |
| Education                              | 1.03          | 1             | 0.85          | 0.86           | 0.96           | 1.11           | 0.99          | 0.98           | 1.13          | 0.98           | 0.95           | 0.98          | 1.05          | 0.97          |
|                                        | [0.99 – 1.08] | [0.94 – 1.07] | [0.67 – 1.07] | [0.68 – 1.08]  | [0.77 – 1.19]  | [0.90 – 1.36]  | [0.91 – 1.09] | [0.74 – 1.31]  | [0.93 – 1.39] | [0.78 – 1.23]  | [0.71 – 1.26]  | [0.81 – 1.19] | [0.88 – 1.25] | [0.81 – 1.16] |
| Numeracy                               | 1.01          | 0.94 *        | 0.91          | 0.84           | 0.80 *         | 0.88           | 0.90 *        | 0.64 **        | 0.99          | 0.92           | 0.95           | 1             | 0.91          | 1.01          |
|                                        | [0.97 – 1.05] | [0.89 – 0.99] | [0.73 – 1.15] | [0.67 – 1.05]  | [0.65 – 0.98]  | [0.72 – 1.09]  | [0.82 – 0.99] | [0.48 – 0.84]  | [0.81 – 1.23] | [0.73 – 1.16]  | [0.73 – 1.26]  | [0.82 – 1.22] | [0.76 – 1.10] | [0.84 – 1.21] |
| Politics (Conservative)                | 0.93 ***      | 0.94 *        | 0.87          | 1.2            | 1.23           | 1.06           |               | 0.88           | 1.02          | 1.02           | 0.85           | 1.18          | 0.9           | 0.91          |
|                                        | [0.89 – 0.97] | [0.89 – 0.99] | [0.68 – 1.11] | [0.96 – 1.52]  | [0.98 – 1.55]  | [0.84 – 1.33]  |               | [0.66 – 1.18]  | [0.84 – 1.25] | [0.80 – 1.30]  | [0.64 – 1.13]  | [0.96 – 1.44] | [0.74 – 1.08] | [0.75 – 1.10] |
| Prosociality                           | 1.06 **       | 1.05          | 0.98          | 1.06           | 0.98           | 1.2            | 1.07          | 1.05           | 1.16          | 1.26           | 1              | 0.98          | 0.96          | 0.96          |
|                                        | [1.02 – 1.10] | [0.99 – 1.12] | [0.75 – 1.26] | [0.82 – 1.36]  | [0.78 – 1.23]  | [0.96 – 1.50]  | [0.98 – 1.17] | [0.78 – 1.40]  | [0.93 – 1.45] | [0.98 – 1.62]  | [0.76 – 1.31]  | [0.80 – 1.20] | [0.79 – 1.15] | [0.79 – 1.16] |
| General social trust                   | 1.05 *        | 1.05          | 1.18          | 0.96           | 0.92           | 1.15           | 1             | 0.99           | 0.97          | 1.14           | 1.26           | 0.93          | 0.97          | 1.01          |
|                                        | [1.01 – 1.10] | [0.99 – 1.11] | [0.91 – 1.52] | [0.75 – 1.24]  | [0.73 – 1.16]  | [0.92 – 1.44]  | [0.91 – 1.10] | [0.74 – 1.34]  | [0.77 – 1.22] | [0.87 – 1.48]  | [0.95 – 1.70]  | [0.76 – 1.14] | [0.80 – 1.19] | [0.83 – 1.24] |
| General trust: Experts                 | 1.28 ***      | 1.26 ***      | 1.38 *        | 0.89           | 1.33 *         | 1.55 ***       | 1.18 **       | 1.45 *         | 1.25          | 1.3            | 1.05           | 1.49 ***      | 1.14          | 1.18          |
|                                        | [1.22 – 1.34] | [1.18 – 1.36] | [1.06 – 1.80] | [0.66 – 1.20]  | [1.03 – 1.74]  | [1.23 – 1.97]  | [1.06 – 1.31] | [1.04 – 2.01]  | [0.97 – 1.60] | [1.00 – 1.71]  | [0.78 – 1.41]  | [1.18 – 1.88] | [0.91 – 1.44] | [0.95 – 1.48] |
| General trust: Govt                    | 1.02          | 0.94          | 0.74          | 1.07           | 1.24           | 1.01           | 1.08          | 0.97           | 1.07          | 0.70 *         | 1.28           | 1.02          | 0.98          | 1.06          |
|                                        | [0.97 – 1.08] | [0.87 – 1.01] | [0.54 – 1.00] | [0.77 – 1.48]  | [0.91 – 1.69]  | [0.76 – 1.34]  | [0.94 – 1.23] | [0.68 – 1.39]  | [0.81 – 1.40] | [0.52 – 0.93]  | [0.88 – 1.87]  | [0.78 – 1.32] | [0.75 – 1.27] | [0.79 – 1.42] |
| COVID trust: Politicians               | 1.06          | 1.03          | 1.14          | 1.50 *         | 1.16           | 1.13           | 1.11          | 0.72           | 0.98          | 1.17           | 0.92           | 1.1           | 1.16          | 0.89          |
|                                        | [0.99 – 1.13] | [0.94 – 1.13] | [0.78 – 1.66] | [1.02 – 2.21]  | [0.83 – 1.63]  | [0.81 – 1.57]  | [0.97 – 1.27] | [0.45 – 1.12]  | [0.67 – 1.41] | [0.86 – 1.58]  | [0.61 – 1.37]  | [0.81 – 1.48] | [0.85 – 1.58] | [0.64 – 1.23] |
| COVID Trust: National sci/med advisors | 1.22 ***      | 1.22 ***      | 1.08          | 0.94           | 0.95           | 1.66 ***       | 1.22 **       | 1.12           | 1.08          | 0.88           | 1.23           | 1.1           | 1.04          | 1.04          |
|                                        | [1.15 – 1.29] | [1.12 – 1.33] | [0.76 – 1.52] | [0.63 – 1.41]  | [0.69 – 1.31]  | [1.24 – 2.24]  | [1.08 – 1.39] | [0.72 – 1.77]  | [0.79 – 1.48] | [0.63 – 1.24]  | [0.89 – 1.70]  | [0.83 – 1.44] | [0.77 – 1.39] | [0.77 – 1.41] |
| COVID Trust: Independent scientists    | 0.95 *        | 1             | 1.02          | 0.89           | 1              | 0.73 *         | 0.98          | 0.99           | 1.05          | 1.01           | 1.05           | 1.13          | 0.98          | 1.03          |
|                                        | [0.91 – 1.00] | [0.93 – 1.07] | [0.76 – 1.34] | [0.65 – 1.22]  | [0.76 – 1.32]  | [0.56 – 0.95]  | [0.89 – 1.09] | [0.70 – 1.37]  | [0.78 – 1.41] | [0.74 – 1.37]  | [0.77 – 1.41]  | [0.89 – 1.42] | [0.78 – 1.23] | [0.83 – 1.27] |
| COVID Trust: WHO                       | 1.19 ***      | 1.11 **       | 0.96          | 1.58 **        | 1              | 1.03           | 1.05          | 1.11           | 0.9           | 1.07           | 1.13           | 1.57 ***      | 1.17          | 1.27 *        |
|                                        | [1.14 – 1.25] | [1.04 – 1.19] | [0.71 – 1.28] | [1.16 – 2.15]  | [0.74 – 1.33]  | [0.78 – 1.35]  | [0.94 – 1.18] | [0.74 – 1.63]  | [0.69 – 1.18] | [0.83 – 1.38]  | [0.83 – 1.54]  | [1.22 – 2.01] | [0.92 – 1.48] | [1.01 – 1.60] |
| Personal efficacy                      | 1             | 0.92 *        | 0.85          | 1.04           | 0.93           | 0.91           | 0.87 **       | 1.02           | 0.92          | 1.01           | 0.85           | 0.82          | 0.73 **       | 1.09          |
|                                        | [0.96 – 1.05] | [0.86 – 0.98] | [0.64 – 1.12] | [0.80 – 1.34]  | [0.71 – 1.21]  | [0.71 – 1.16]  | [0.79 – 0.96] | [0.73 – 1.44]  | [0.72 – 1.18] | [0.75 – 1.36]  | [0.61 – 1.16]  | [0.64 – 1.05] | [0.59 – 0.90] | [0.90 – 1.32] |
| Govt efficacy                          | 1.01          | 1.07          | 1.25          | 0.93           | 0.97           | 1.08           | 1.05          | 1.35           | 1.15          | 1.05           | 1.01           | 0.87          | 1.2           | 1.13          |
|                                        | [0.96 – 1.08] | [0.99 – 1.16] | [0.88 – 1.79] | [0.69 – 1.25]  | [0.70 – 1.33]  | [0.79 – 1.47]  | [0.93 – 1.19] | [0.92 – 1.98]  | [0.81 – 1.64] | [0.75 – 1.46]  | [0.68 – 1.51]  | [0.65 – 1.17] | [0.90 – 1.61] | [0.85 – 1.50] |
| Perceived infection risk               | 1.13 ***      | 1.14 ***      | 1.06          | 1.49 **        | 1              | 1.11           | 1.29 ***      | 1.47 **        | 1.2           | 1.07           | 1.44 *         | 1.28 *        | 1.33 **       | 0.79 *        |
|                                        | [1.08 – 1.17] | [1.08 – 1.21] | [0.82 – 1.37] | [1.16 – 1.92]  | [0.80 – 1.25]  | [0.89 – 1.38]  | [1.18 – 1.42] | [1.11 – 1.95]  | [0.97 – 1.48] | [0.83 – 1.38]  | [1.07 – 1.94]  | [1.03 – 1.59] | [1.09 – 1.62] | [0.65 – 0.97] |
| Worry about COVID                      | 1.47 ***      | 1.51 ***      | 1.69 ***      | 1.33 *         | 1.36 *         | 1.19           | 1.36 ***      | 1.54 **        | 1.33 **       | 1.24           | 1.66 ***       | 1.31 *        | 1.34 **       | 1.77 ***      |
|                                        | [1.41 – 1.53] | [1.42 – 1.60] | [1.34 – 2.16] | [1.05 – 1.69]  | [1.07 – 1.73]  | [0.95 – 1.48]  | [1.24 – 1.50] | [1.18 – 2.03]  | [1.07 – 1.65] | [0.96 – 1.59]  | [1.26 – 2.21]  | [1.05 – 1.62] | [1.10 – 1.63] | [1.44 – 2.19] |
| Observations                           | 19216         | 8398          | 644           | 639            | 668            | 666            | 2969          | 530            | 590           | 677            | 624            | 682           | 652           | 653           |
| R <sup>2</sup> Tjur                    | 0.128         | 0.101         | 0.096         | 0.184          | 0.061          | 0.137          | 0.151         | 0.141          | 0.077         | 0.04           | 0.115          | 0.197         | 0.102         | 0.132         |

Odds ratios [95CI] shown, all continuous measures were standardized (scaled and mean-centered) prior to analysis. For space, samples are defined by their two character ISO country code and a letter denoting participant source (B, BVA; D, Dynata; P Prolific; R, Respondi). <sup>a</sup>Gender is unstandardized. Political orientation data was not collected in France; this sample is excluded from pooled data.

\*p < .05, \*\*p < .01, \*\*\* p < .001

Table S5 (continued)

Full logistic regression results from model predicting vaccine acceptance

|                                        | UK_P (Mar)    | UK_P (May)     | UK_P (Jul)    | UK_P (Sep)    | UK_R (May)    | UK_R (Jul)    | UK_R (Sep)    | UK_R (Oct)    | US_P (Mar)    | US_R (May)    |
|----------------------------------------|---------------|----------------|---------------|---------------|---------------|---------------|---------------|---------------|---------------|---------------|
|                                        | OR            | OR             | OR            | OR            | OR            | OR            | OR            | OR            | OR            | OR            |
| (Intercept)                            | 5.20 ***      | 7.58 ***       | 6.42 ***      | 4.14 ***      | 5.62 ***      | 6.68 ***      | 5.56 ***      | 4.91 ***      | 4.66 ***      | 5.12 ***      |
|                                        | [3.87 – 7.11] | [5.81 – 10.07] | [5.06 – 8.23] | [3.47 – 4.98] | [4.37 – 7.33] | [5.22 – 8.68] | [4.57 – 6.81] | [4.05 – 6.00] | [3.46 – 6.38] | [3.71 – 7.21] |
| Age                                    | 1.18          | 1.38 ***       | 1.20 *        | 1.12          | 1.48 ***      | 1.38 ***      | 1.39 ***      | 1.37 ***      | 0.91          | 1.2           |
|                                        | [0.96 – 1.46] | [1.15 – 1.65]  | [1.02 – 1.42] | [0.99 – 1.27] | [1.23 – 1.80] | [1.16 – 1.65] | [1.21 – 1.59] | [1.20 – 1.58] | [0.74 – 1.13] | [0.95 – 1.52] |
| Gender (Female)                        | 0.79          | 0.53 ***       | 0.56 ***      | 0.62 ***      | 0.78          | 0.68 *        | 0.50 ***      | 0.44 ***      | 0.72          | 0.74          |
|                                        | [0.52 – 1.20] | [0.37 – 0.75]  | [0.41 – 0.76] | [0.49 – 0.79] | [0.55 – 1.08] | [0.49 – 0.94] | [0.38 – 0.64] | [0.34 – 0.57] | [0.48 – 1.09] | [0.48 – 1.13] |
| Education                              | 0.98          | 0.85           | 1.13          | 1.02          | 1.05          | 1.07          | 1.11          | 1.18 *        | 1.08          | 1.05          |
|                                        | [0.80 – 1.21] | [0.71 – 1.00]  | [0.97 – 1.32] | [0.91 – 1.15] | [0.88 – 1.24] | [0.91 – 1.26] | [0.98 – 1.27] | [1.04 – 1.34] | [0.88 – 1.32] | [0.85 – 1.30] |
| Numeracy                               | 1.30 *        | 0.99           | 1.20 *        | 1.12          | 1.24 *        | 1.11          | 1             | 1             | 1.21          | 1.41 **       |
|                                        | [1.05 – 1.62] | [0.84 – 1.17]  | [1.02 – 1.41] | [0.99 – 1.26] | [1.05 – 1.48] | [0.95 – 1.32] | [0.88 – 1.14] | [0.88 – 1.13] | [0.98 – 1.50] | [1.13 – 1.78] |
| Politics (Conservative)                | 0.83          | 0.9            | 0.92          | 0.85 *        | 0.91          | 0.95          | 0.88          | 0.86 *        | 0.73 *        | 0.77          |
|                                        | [0.66 – 1.05] | [0.74 – 1.09]  | [0.77 – 1.11] | [0.74 – 0.97] | [0.76 – 1.10] | [0.79 – 1.13] | [0.77 – 1.01] | [0.75 – 0.99] | [0.57 – 0.93] | [0.58 – 1.01] |
| Prosociality                           | 1.09          | 1.19 *         | 1.15          | 1.11          | 0.89          | 1.04          | 1.09          | 1.07          | 1             | 1.2           |
|                                        | [0.89 – 1.34] | [1.01 – 1.41]  | [0.99 – 1.34] | [0.98 – 1.26] | [0.74 – 1.06] | [0.88 – 1.23] | [0.96 – 1.25] | [0.94 – 1.23] | [0.81 – 1.23] | [0.96 – 1.51] |
| General social trust                   | 0.85          | 1.04           | 0.94          | 1.03          | 1.06          | 1.19          | 1.09          | 0.97          | 1.14          | 0.97          |
|                                        | [0.68 – 1.06] | [0.86 – 1.25]  | [0.79 – 1.12] | [0.91 – 1.17] | [0.88 – 1.27] | [1.00 – 1.43] | [0.96 – 1.25] | [0.85 – 1.11] | [0.90 – 1.44] | [0.77 – 1.23] |
| General trust: Experts                 | 1.06          | 1.39 **        | 1.38 ***      | 1.39 ***      | 1.12          | 1.42 ***      | 1.23 **       | 1.45 ***      | 1.53 **       | 1.36 *        |
|                                        | [0.83 – 1.34] | [1.13 – 1.70]  | [1.16 – 1.65] | [1.20 – 1.60] | [0.91 – 1.38] | [1.17 – 1.71] | [1.06 – 1.44] | [1.24 – 1.70] | [1.16 – 2.03] | [1.02 – 1.82] |
| General trust:Govt                     | 1.27          | 1              | 1.06          | 1.27 **       | 1.13          | 1.11          | 1.14          | 1.03          | 0.87          | 0.96          |
|                                        | [0.96 – 1.68] | [0.79 – 1.27]  | [0.86 – 1.31] | [1.08 – 1.51] | [0.90 – 1.43] | [0.88 – 1.38] | [0.95 – 1.37] | [0.86 – 1.22] | [0.67 – 1.13] | [0.72 – 1.28] |
| COVID trust: Politicians               | 1.17          | 0.98           | 1.1           | 0.93          | 1.01          | 1.2           | 1.11          | 1.26 *        | 1.21          | 1.01          |
|                                        | [0.82 – 1.67] | [0.73 – 1.31]  | [0.85 – 1.44] | [0.76 – 1.14] | [0.76 – 1.33] | [0.89 – 1.62] | [0.88 – 1.39] | [1.01 – 1.56] | [0.86 – 1.69] | [0.73 – 1.40] |
| COVID Trust: National sci/med advisors | 1.18          | 1.50 ***       | 1.22          | 1.14          | 1.17          | 0.95          | 1.25 *        | 1.29 **       | 0.78          | 1.95 ***      |
|                                        | [0.88 – 1.59] | [1.18 – 1.89]  | [0.99 – 1.50] | [0.97 – 1.34] | [0.92 – 1.50] | [0.74 – 1.22] | [1.04 – 1.50] | [1.07 – 1.56] | [0.57 – 1.04] | [1.41 – 2.73] |
| COVID Trust: Independent scientists    | 1.08          | 0.89           | 0.83 *        | 0.93          | 0.84          | 1.02          | 0.88          | 1             | 1.12          | 0.81          |
|                                        | [0.84 – 1.37] | [0.73 – 1.08]  | [0.69 – 0.99] | [0.80 – 1.07] | [0.68 – 1.04] | [0.83 – 1.25] | [0.74 – 1.04] | [0.85 – 1.17] | [0.89 – 1.41] | [0.62 – 1.06] |
| COVID Trust: WHO                       | 1.05          | 1.26 *         | 1.24 *        | 1.45 ***      | 1.52 ***      | 1.06          | 1.32 **       | 1.04          | 1.17          | 1.02          |
|                                        | [0.80 – 1.35] | [1.04 – 1.53]  | [1.03 – 1.50] | [1.25 – 1.68] | [1.22 – 1.88] | [0.85 – 1.32] | [1.11 – 1.57] | [0.87 – 1.24] | [0.90 – 1.51] | [0.76 – 1.37] |
| Personal efficacy                      | 1.06          | 1.1            | 1.05          | 1.1           | 1.06          | 1.16          | 1.03          | 1.03          | 1.23          | 1.08          |
|                                        | [0.86 – 1.31] | [0.92 – 1.30]  | [0.89 – 1.23] | [0.96 – 1.25] | [0.87 – 1.29] | [0.96 – 1.39] | [0.89 – 1.18] | [0.89 – 1.18] | [0.99 – 1.52] | [0.84 – 1.38] |
| Govt efficacy                          | 0.84          | 0.82           | 1.06          | 1             | 1.02          | 0.96          | 0.95          | 1.04          | 1.05          | 0.98          |
|                                        | [0.62 – 1.13] | [0.63 – 1.05]  | [0.83 – 1.34] | [0.84 – 1.20] | [0.79 – 1.30] | [0.73 – 1.27] | [0.77 – 1.17] | [0.86 – 1.27] | [0.77 – 1.43] | [0.72 – 1.34] |
| Perceived infection risk               | 1.18          | 1.39 ***       | 1.30 **       | 1.04          | 1.19          | 1.18          | 1.09          | 0.99          | 1.26          | 1.46 **       |
|                                        | [0.96 – 1.46] | [1.16 – 1.66]  | [1.09 – 1.54] | [0.90 – 1.18] | [1.00 – 1.42] | [0.98 – 1.41] | [0.94 – 1.26] | [0.86 – 1.13] | [1.00 – 1.59] | [1.14 – 1.86] |
| Worry about COVID-19                   | 1.1           | 1.25 *         | 1.41 ***      | 1.37 ***      | 1.58 ***      | 1.63 ***      | 1.56 ***      | 1.43 ***      | 1.47 **       | 1.27          |
|                                        | [0.88 – 1.36] | [1.04 – 1.48]  | [1.19 – 1.66] | [1.19 – 1.57] | [1.33 – 1.88] | [1.36 – 1.96] | [1.36 – 1.80] | [1.23 – 1.65] | [1.17 – 1.87] | [0.99 – 1.64] |
| Observations                           | 698           | 1143           | 1314          | 1845          | 1095          | 1249          | 1772          | 1702          | 693           | 680           |
| R <sup>2</sup> Tjur                    | 0.068         | 0.172          | 0.165         | 0.192         | 0.168         | 0.169         | 0.174         | 0.192         | 0.184         | 0.283         |

Odds ratios [95CI] shown, all continuous measures were standardized (scaled and mean-centered) prior to analysis. For space, samples are defined by their two character ISO country code and a letter denoting participant source (R, Respondi; P, Prolific). <sup>a</sup>Gender is unstandardized

\*p < .05, \*\*p < .01, \*\*\* p < .001



1  
2  
3  
4  
5  
6  
7  
8  
9  
10  
11  
12  
13  
14  
15  
16  
17  
18  
19  
20  
21  
22  
23  
24  
25  
26  
27  
28  
29  
30  
31  
32  
33  
34  
35  
36  
37  
38  
39  
40  
41  
42  
43  
44  
45  
46

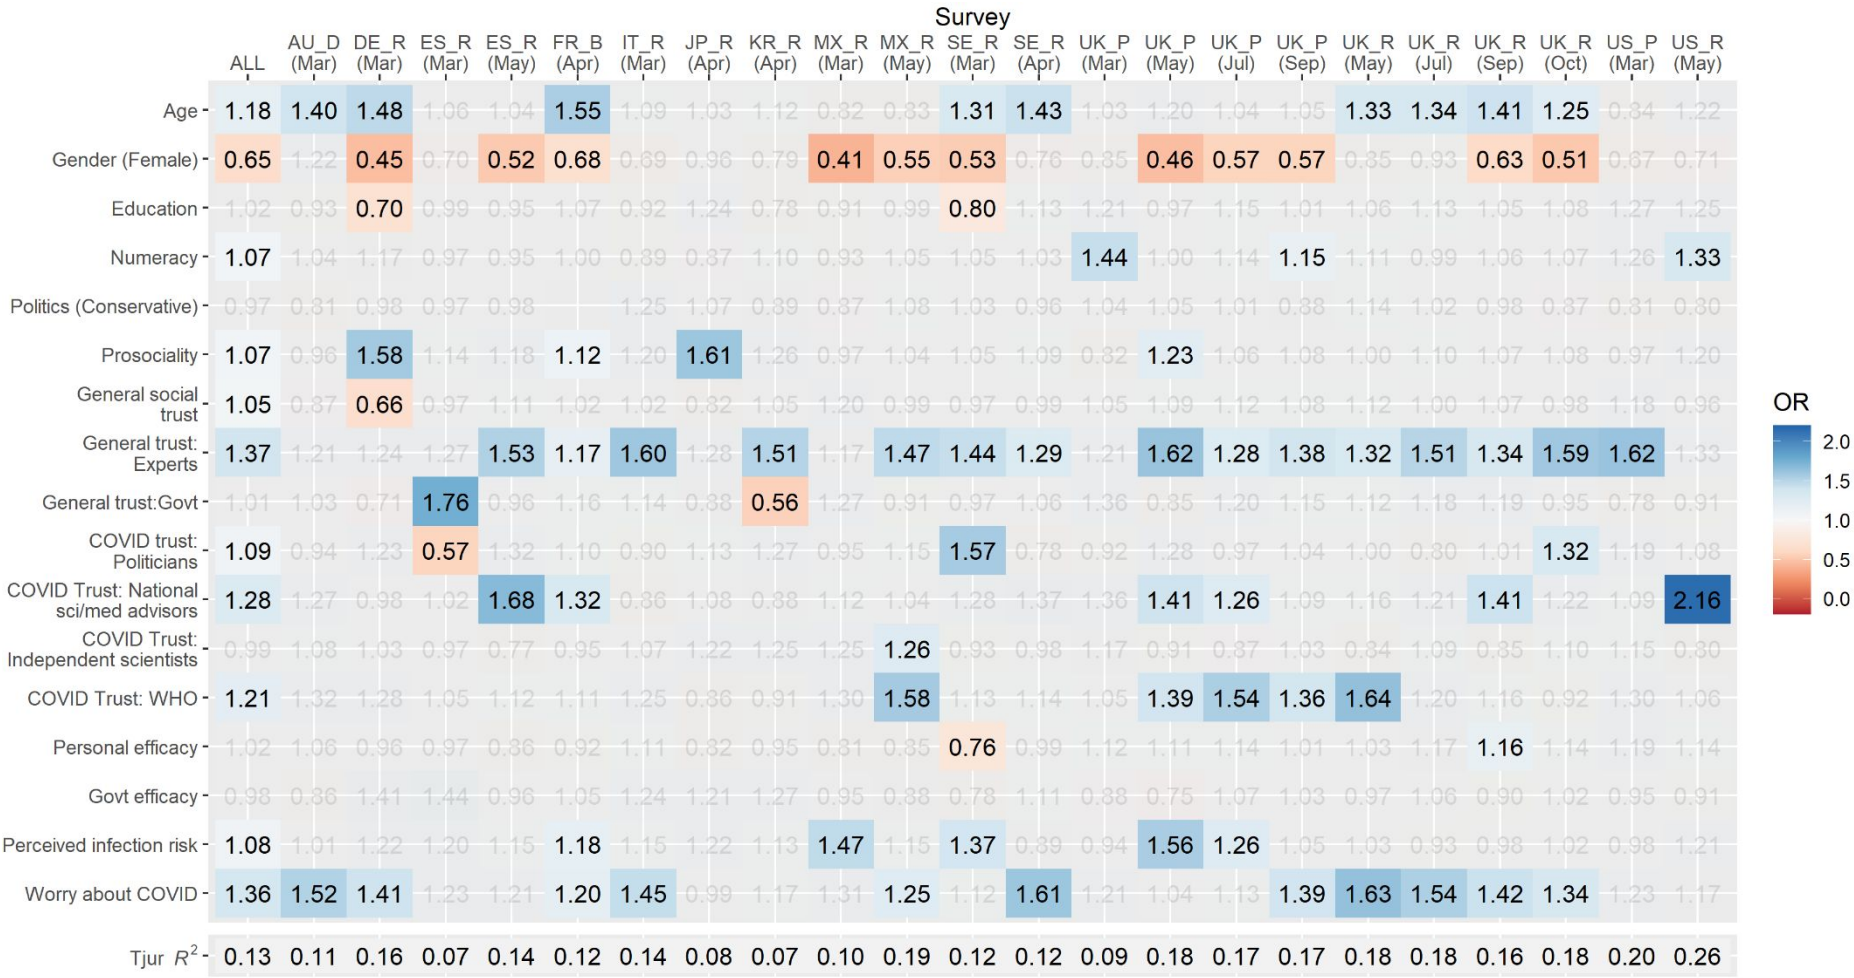

Figure S2. Heatmap of odds ratios in model predicting recommending vaccine to vulnerable friends/family. Columns represent individual samples and rows represent predictors in model. Grey values are non-significant, p > .05. Red shading indicates a lower likelihood of vaccine acceptance and blue shading a higher likelihood. For space, samples are defined by their two character ISO country code and a letter denoting participant source (B, BVA; D, Dynata; R, Respondi). Political orientation data was not collected in France, this sample is excluded from pooled data.

Table S6

Full logistic regression results from model predicting vaccine recommendation to vulnerable friends or family (continued on following page)

|                                        | ALL           | AU_D<br>(Mar)  | DE_R<br>(Mar)   | ES_R<br>(Mar)  | ES_R<br>(May)  | FR_B<br>(Apr) | IT_R<br>(Mar)  | JP_R<br>(Apr) | KR_R<br>(Apr)  | MX_R<br>(Mar)   | MX_R<br>(May) | SE_R<br>(Mar) | SE_R<br>(Apr) |
|----------------------------------------|---------------|----------------|-----------------|----------------|----------------|---------------|----------------|---------------|----------------|-----------------|---------------|---------------|---------------|
|                                        | OR            | OR             | OR              | OR             | OR             | OR            | OR             | OR            | OR             | OR              | OR            | OR            | OR            |
| (Intercept)                            | 7.64 ***      | 10.40 ***      | 21.06 ***       | 13.37 ***      | 8.84 ***       | 6.45 ***      | 14.40 ***      | 4.88 ***      | 11.66 ***      | 22.54 ***       | 5.04 ***      | 5.49 ***      | 3.72 ***      |
|                                        | [7.15 – 8.17] | [7.01 – 16.08] | [13.01 – 36.22] | [8.82 – 21.29] | [6.21 – 12.98] | [5.50 – 7.61] | [8.98 – 24.48] | [3.58 – 6.79] | [7.94 – 17.84] | [13.36 – 41.23] | [3.72 – 6.96] | [4.05 – 7.60] | [2.80 – 5.01] |
| Age                                    | 1.18 ***      | 1.40 *         | 1.48 *          | 1.06           | 1.04           | 1.55 ***      | 1.09           | 1.03          | 1.12           | 0.82            | 0.83          | 1.31 *        | 1.43 **       |
|                                        | [1.13 – 1.24] | [1.05 – 1.88]  | [1.09 – 2.02]   | [0.80 – 1.41]  | [0.83 – 1.32]  | [1.39 – 1.73] | [0.79 – 1.51]  | [0.81 – 1.29] | [0.86 – 1.48]  | [0.60 – 1.11]   | [0.68 – 1.02] | [1.06 – 1.63] | [1.15 – 1.78] |
| Gender (Female) <sup>a</sup>           | 0.65 ***      | 1.22           | 0.45 **         | 0.7            | 0.52 **        | 0.68 ***      | 0.69           | 0.96          | 0.79           | 0.41 **         | 0.55 **       | 0.53 **       | 0.76          |
|                                        | [0.59 – 0.70] | [0.71 – 2.10]  | [0.25 – 0.81]   | [0.40 – 1.21]  | [0.32 – 0.81]  | [0.56 – 0.84] | [0.37 – 1.26]  | [0.62 – 1.50] | [0.47 – 1.32]  | [0.20 – 0.77]   | [0.36 – 0.82] | [0.35 – 0.81] | [0.50 – 1.13] |
| Education                              | 1.02          | 0.93           | 0.70 *          | 0.99           | 0.95           | 1.07          | 0.92           | 1.24          | 0.78           | 0.91            | 0.99          | 0.80 *        | 1.13          |
|                                        | [0.98 – 1.07] | [0.70 – 1.23]  | [0.52 – 0.93]   | [0.76 – 1.29]  | [0.76 – 1.18]  | [0.97 – 1.18] | [0.67 – 1.26]  | [0.99 – 1.55] | [0.59 – 1.02]  | [0.65 – 1.25]   | [0.81 – 1.21] | [0.65 – 0.98] | [0.93 – 1.37] |
| Numeracy                               | 1.07 ***      | 1.04           | 1.17            | 0.97           | 0.95           | 1             | 0.89           | 0.87          | 1.1            | 0.93            | 1.05          | 1.05          | 1.03          |
|                                        | [1.03 – 1.12] | [0.79 – 1.40]  | [0.88 – 1.58]   | [0.75 – 1.27]  | [0.76 – 1.19]  | [0.91 – 1.11] | [0.65 – 1.23]  | [0.70 – 1.10] | [0.84 – 1.45]  | [0.69 – 1.27]   | [0.86 – 1.29] | [0.85 – 1.30] | [0.85 – 1.27] |
| Politics (Conservative)                | 0.97          | 0.81           | 0.98            | 0.97           | 0.98           |               | 1.25           | 1.07          | 0.89           | 0.87            | 1.08          | 1.03          | 0.96          |
|                                        | [0.93 – 1.01] | [0.60 – 1.08]  | [0.73 – 1.31]   | [0.74 – 1.29]  | [0.77 – 1.24]  |               | [0.91 – 1.72]  | [0.86 – 1.33] | [0.67 – 1.17]  | [0.64 – 1.20]   | [0.89 – 1.32] | [0.84 – 1.27] | [0.78 – 1.19] |
| Prosociality                           | 1.07 **       | 0.96           | 1.58 **         | 1.14           | 1.18           | 1.12 *        | 1.2            | 1.61 ***      | 1.26           | 0.97            | 1.04          | 1.05          | 1.09          |
|                                        | [1.03 – 1.12] | [0.70 – 1.31]  | [1.14 – 2.19]   | [0.87 – 1.49]  | [0.94 – 1.49]  | [1.01 – 1.23] | [0.88 – 1.62]  | [1.26 – 2.07] | [0.95 – 1.66]  | [0.72 – 1.31]   | [0.84 – 1.27] | [0.85 – 1.30] | [0.89 – 1.34] |
| General social trust                   | 1.05 *        | 0.87           | 0.66 *          | 0.97           | 1.11           | 1.02          | 1.02           | 0.82          | 1.05           | 1.2             | 0.99          | 0.97          | 0.99          |
|                                        | [1.00 – 1.10] | [0.62 – 1.19]  | [0.47 – 0.92]   | [0.71 – 1.31]  | [0.87 – 1.41]  | [0.92 – 1.14] | [0.74 – 1.41]  | [0.63 – 1.07] | [0.78 – 1.42]  | [0.88 – 1.68]   | [0.81 – 1.22] | [0.77 – 1.22] | [0.80 – 1.23] |
| General trust: Experts                 | 1.37 ***      | 1.21           | 1.24            | 1.27           | 1.53 ***       | 1.17 **       | 1.60 **        | 1.28          | 1.51 **        | 1.17            | 1.47 **       | 1.44 **       | 1.29 *        |
|                                        | [1.31 – 1.44] | [0.89 – 1.63]  | [0.85 – 1.83]   | [0.93 – 1.74]  | [1.20 – 1.96]  | [1.04 – 1.31] | [1.14 – 2.25]  | [0.97 – 1.69] | [1.12 – 2.05]  | [0.85 – 1.60]   | [1.17 – 1.86] | [1.12 – 1.85] | [1.02 – 1.63] |
| General trust: Govt                    | 1.01          | 1.03           | 0.71            | 1.76 **        | 0.96           | 1.16          | 1.14           | 0.88          | 0.56 ***       | 1.27            | 0.91          | 0.97          | 1.06          |
|                                        | [0.96 – 1.08] | [0.72 – 1.47]  | [0.46 – 1.10]   | [1.20 – 2.62]  | [0.71 – 1.30]  | [0.99 – 1.35] | [0.77 – 1.70]  | [0.66 – 1.18] | [0.40 – 0.77]  | [0.84 – 1.95]   | [0.70 – 1.19] | [0.73 – 1.30] | [0.78 – 1.46] |
| COVID trust: Politicians               | 1.09 *        | 0.94           | 1.23            | 0.57 *         | 1.32           | 1.1           | 0.9            | 1.13          | 1.27           | 0.95            | 1.15          | 1.57 *        | 0.78          |
|                                        | [1.01 – 1.17] | [0.59 – 1.49]  | [0.75 – 2.02]   | [0.36 – 0.89]  | [0.93 – 1.90]  | [0.94 – 1.29] | [0.55 – 1.45]  | [0.75 – 1.72] | [0.89 – 1.82]  | [0.61 – 1.49]   | [0.84 – 1.56] | [1.11 – 2.23] | [0.54 – 1.10] |
| COVID Trust: National sci/med advisors | 1.28 ***      | 1.27           | 0.98            | 1.02           | 1.68 ***       | 1.32 ***      | 0.86           | 1.08          | 0.88           | 1.12            | 1.04          | 1.28          | 1.37          |
|                                        | [1.21 – 1.36] | [0.85 – 1.92]  | [0.59 – 1.60]   | [0.69 – 1.51]  | [1.24 – 2.30]  | [1.14 – 1.52] | [0.54 – 1.37]  | [0.77 – 1.53] | [0.61 – 1.28]  | [0.78 – 1.61]   | [0.78 – 1.37] | [0.93 – 1.75] | [0.99 – 1.91] |
| COVID Trust: Independent scientists    | 0.99          | 1.08           | 1.03            | 0.97           | 0.77           | 0.95          | 1.07           | 1.22          | 1.25           | 1.25            | 1.26 *        | 0.93          | 0.98          |
|                                        | [0.94 – 1.04] | [0.76 – 1.53]  | [0.70 – 1.52]   | [0.68 – 1.36]  | [0.58 – 1.02]  | [0.85 – 1.07] | [0.75 – 1.50]  | [0.88 – 1.70] | [0.89 – 1.74]  | [0.89 – 1.74]   | [1.00 – 1.59] | [0.72 – 1.21] | [0.77 – 1.24] |
| COVID Trust: WHO                       | 1.21 ***      | 1.32           | 1.28            | 1.05           | 1.12           | 1.11          | 1.25           | 0.86          | 0.91           | 1.3             | 1.58 ***      | 1.13          | 1.14          |
|                                        | [1.15 – 1.28] | [0.93 – 1.85]  | [0.86 – 1.90]   | [0.74 – 1.47]  | [0.84 – 1.49]  | [0.98 – 1.26] | [0.83 – 1.86]  | [0.63 – 1.15] | [0.66 – 1.23]  | [0.93 – 1.81]   | [1.23 – 2.02] | [0.87 – 1.47] | [0.89 – 1.46] |
| Personal efficacy                      | 1.02          | 1.06           | 0.96            | 0.97           | 0.86           | 0.92          | 1.11           | 0.82          | 0.95           | 0.81            | 0.85          | 0.76 *        | 0.99          |
|                                        | [0.97 – 1.06] | [0.76 – 1.47]  | [0.70 – 1.30]   | [0.71 – 1.32]  | [0.66 – 1.11]  | [0.82 – 1.02] | [0.77 – 1.59]  | [0.62 – 1.07] | [0.69 – 1.31]  | [0.56 – 1.15]   | [0.66 – 1.10] | [0.60 – 0.96] | [0.80 – 1.22] |
| Govt efficacy                          | 0.98          | 0.86           | 1.41            | 1.44           | 0.96           | 1.05          | 1.24           | 1.21          | 1.27           | 0.95            | 0.88          | 0.78          | 1.11          |
|                                        | [0.92 – 1.05] | [0.55 – 1.33]  | [0.97 – 2.05]   | [0.96 – 2.20]  | [0.69 – 1.33]  | [0.91 – 1.21] | [0.81 – 1.89]  | [0.81 – 1.81] | [0.87 – 1.85]  | [0.61 – 1.48]   | [0.65 – 1.19] | [0.56 – 1.07] | [0.82 – 1.52] |
| Perceived infection risk               | 1.08 ***      | 1.01           | 1.22            | 1.2            | 1.15           | 1.18 **       | 1.15           | 1.22          | 1.13           | 1.47 *          | 1.15          | 1.37 **       | 0.89          |
|                                        | [1.03 – 1.13] | [0.74 – 1.37]  | [0.89 – 1.68]   | [0.91 – 1.58]  | [0.91 – 1.45]  | [1.06 – 1.31] | [0.83 – 1.58]  | [0.96 – 1.55] | [0.84 – 1.50]  | [1.06 – 2.04]   | [0.92 – 1.43] | [1.10 – 1.71] | [0.72 – 1.10] |
| Worry about COVID-19                   | 1.36 ***      | 1.52 **        | 1.41 *          | 1.23           | 1.21           | 1.20 ***      | 1.45 **        | 0.99          | 1.17           | 1.31            | 1.25 *        | 1.12          | 1.61 ***      |
|                                        | [1.30 – 1.42] | [1.15 – 2.03]  | [1.05 – 1.90]   | [0.92 – 1.64]  | [0.96 – 1.52]  | [1.08 – 1.34] | [1.09 – 1.92]  | [0.78 – 1.25] | [0.88 – 1.53]  | [0.96 – 1.79]   | [1.01 – 1.56] | [0.90 – 1.38] | [1.29 – 2.00] |
| Observations                           | 19208         | 643            | 639             | 668            | 667            | 2969          | 530            | 590           | 677            | 620             | 681           | 652           | 653           |
| R <sup>2</sup> Tjur                    | 0.131         | 0.109          | 0.162           | 0.069          | 0.136          | 0.118         | 0.137          | 0.076         | 0.073          | 0.105           | 0.186         | 0.121         | 0.124         |

Odds ratios [95CI] shown, all continuous measures were standardized (scaled and mean-centered) prior to analysis. For space, samples are defined by their two character ISO country code and a letter denoting participant source (D, Dynata; P, Prolific; R, Respondi). <sup>a</sup>Gender is unstandardized. Political orientation data was not collected in France; this sample is excluded from pooled data. \*p < .05, \*\*p < .01, \*\*\* p < .001

Table S6 (continued)

Full logistic regression results from model predicting vaccine recommendation to vulnerable others

|                                        | UK_P (Mar)      | UK_P (May)      | UK_P (Jul)     | UK_P (Sep)    | UK_R (May)     | UK_R (Jul)     | UK_R (Sep)    | UK_R (Oct)    | US_P (Mar)     | US_R (May)     |
|----------------------------------------|-----------------|-----------------|----------------|---------------|----------------|----------------|---------------|---------------|----------------|----------------|
|                                        | OR              | OR              | OR             | OR            | OR             | OR             | OR            | OR            | OR             | OR             |
| (Intercept)                            | 16.28 ***       | 15.53 ***       | 10.84 ***      | 6.56 ***      | 8.65 ***       | 8.29 ***       | 6.65 ***      | 5.75 ***      | 11.91 ***      | 8.09 ***       |
|                                        | [10.45 – 26.82] | [11.04 – 22.50] | [8.18 – 14.64] | [5.37 – 8.08] | [6.48 – 11.80] | [6.34 – 11.02] | [5.41 – 8.25] | [4.70 – 7.10] | [8.02 – 18.38] | [5.64 – 11.97] |
| Age                                    | 1.03            | 1.20            | 1.04           | 1.05          | 1.33 **        | 1.34 **        | 1.41 ***      | 1.25 **       | 0.84           | 1.22           |
|                                        | [0.76 – 1.39]   | [0.97 – 1.49]   | [0.86 – 1.26]  | [0.92 – 1.21] | [1.08 – 1.65]  | [1.10 – 1.64]  | [1.22 – 1.63] | [1.08 – 1.44] | [0.64 – 1.10]  | [0.94 – 1.58]  |
| Gender (Female)                        | 0.85            | 0.46 ***        | 0.57 **        | 0.57 ***      | 0.85           | 0.93           | 0.63 ***      | 0.51 ***      | 0.67           | 0.71           |
|                                        | [0.46 – 1.55]   | [0.30 – 0.69]   | [0.40 – 0.82]  | [0.44 – 0.74] | [0.58 – 1.24]  | [0.65 – 1.33]  | [0.48 – 0.82] | [0.39 – 0.66] | [0.40 – 1.11]  | [0.45 – 1.12]  |
| Education                              | 1.21            | 0.97            | 1.15           | 1.01          | 1.06           | 1.13           | 1.05          | 1.08          | 1.27           | 1.25           |
|                                        | [0.89 – 1.62]   | [0.79 – 1.18]   | [0.96 – 1.37]  | [0.89 – 1.15] | [0.88 – 1.29]  | [0.94 – 1.35]  | [0.91 – 1.20] | [0.94 – 1.23] | [0.98 – 1.64]  | [0.99 – 1.58]  |
| Numeracy                               | 1.44 *          | 1.00            | 1.14           | 1.15 *        | 1.11           | 0.99           | 1.06          | 1.07          | 1.26           | 1.33 *         |
|                                        | [1.05 – 2.02]   | [0.82 – 1.22]   | [0.95 – 1.37]  | [1.00 – 1.32] | [0.92 – 1.35]  | [0.83 – 1.19]  | [0.93 – 1.22] | [0.94 – 1.22] | [0.96 – 1.66]  | [1.04 – 1.72]  |
| Politics (Conservative)                | 1.04            | 1.05            | 1.01           | 0.88          | 1.14           | 1.02           | 0.98          | 0.87          | 0.81           | 0.80           |
|                                        | [0.74 – 1.46]   | [0.84 – 1.32]   | [0.82 – 1.25]  | [0.76 – 1.03] | [0.92 – 1.41]  | [0.83 – 1.24]  | [0.85 – 1.14] | [0.75 – 1.00] | [0.60 – 1.09]  | [0.60 – 1.08]  |
| Prosociality                           | 0.82            | 1.23 *          | 1.06           | 1.08          | 1.00           | 1.1            | 1.07          | 1.08          | 0.97           | 1.20           |
|                                        | [0.60 – 1.09]   | [1.01 – 1.50]   | [0.89 – 1.25]  | [0.94 – 1.23] | [0.82 – 1.22]  | [0.91 – 1.33]  | [0.93 – 1.23] | [0.94 – 1.24] | [0.75 – 1.25]  | [0.94 – 1.53]  |
| General social trust                   | 1.05            | 1.09            | 1.12           | 1.08          | 1.12           | 1.00           | 1.07          | 0.98          | 1.18           | 0.96           |
|                                        | [0.77 – 1.43]   | [0.87 – 1.36]   | [0.92 – 1.37]  | [0.95 – 1.24] | [0.91 – 1.39]  | [0.81 – 1.21]  | [0.93 – 1.24] | [0.85 – 1.13] | [0.89 – 1.57]  | [0.75 – 1.24]  |
| General trust: Experts                 | 1.21            | 1.62 ***        | 1.28 *         | 1.38 ***      | 1.32 *         | 1.51 ***       | 1.34 ***      | 1.59 ***      | 1.62 **        | 1.33           |
|                                        | [0.87 – 1.69]   | [1.28 – 2.05]   | [1.05 – 1.55]  | [1.19 – 1.61] | [1.05 – 1.66]  | [1.23 – 1.84]  | [1.14 – 1.57] | [1.35 – 1.87] | [1.17 – 2.27]  | [0.98 – 1.81]  |
| General trust:Govt                     | 1.36            | 0.85            | 1.2            | 1.15          | 1.12           | 1.18           | 1.19          | 0.95          | 0.78           | 0.91           |
|                                        | [0.90 – 2.06]   | [0.64 – 1.13]   | [0.93 – 1.53]  | [0.96 – 1.38] | [0.86 – 1.44]  | [0.92 – 1.51]  | [0.98 – 1.44] | [0.80 – 1.14] | [0.55 – 1.08]  | [0.67 – 1.24]  |
| COVID trust: Politicians               | 0.92            | 1.28            | 0.97           | 1.04          | 1.00           | 0.80           | 1.01          | 1.32 *        | 1.19           | 1.08           |
|                                        | [0.55 – 1.53]   | [0.91 – 1.83]   | [0.71 – 1.32]  | [0.83 – 1.30] | [0.73 – 1.37]  | [0.57 – 1.13]  | [0.79 – 1.28] | [1.05 – 1.66] | [0.77 – 1.81]  | [0.75 – 1.54]  |
| COVID Trust: National sci/med advisors | 1.36            | 1.41 *          | 1.26 *         | 1.09          | 1.16           | 1.21           | 1.41 ***      | 1.22          | 1.09           | 2.16 ***       |
|                                        | [0.90 – 2.07]   | [1.07 – 1.85]   | [1.00 – 1.58]  | [0.91 – 1.30] | [0.88 – 1.52]  | [0.91 – 1.59]  | [1.16 – 1.72] | [1.00 – 1.48] | [0.76 – 1.55]  | [1.53 – 3.08]  |
| COVID Trust: Independent scientists    | 1.17            | 0.91            | 0.87           | 1.03          | 0.84           | 1.09           | 0.85          | 1.10          | 1.15           | 0.80           |
|                                        | [0.83 – 1.64]   | [0.72 – 1.15]   | [0.70 – 1.06]  | [0.88 – 1.20] | [0.65 – 1.07]  | [0.86 – 1.37]  | [0.71 – 1.01] | [0.93 – 1.30] | [0.86 – 1.53]  | [0.59 – 1.06]  |
| COVID Trust: WHO                       | 1.05            | 1.39 **         | 1.54 ***       | 1.36 ***      | 1.64 ***       | 1.2            | 1.16          | 0.92          | 1.30           | 1.06           |
|                                        | [0.73 – 1.51]   | [1.11 – 1.75]   | [1.25 – 1.90]  | [1.16 – 1.60] | [1.29 – 2.09]  | [0.94 – 1.53]  | [0.96 – 1.39] | [0.76 – 1.11] | [0.96 – 1.75]  | [0.76 – 1.47]  |
| Personal efficacy                      | 1.12            | 1.11            | 1.14           | 1.01          | 1.03           | 1.17           | 1.16 *        | 1.14          | 1.19           | 1.14           |
|                                        | [0.84 – 1.50]   | [0.91 – 1.36]   | [0.95 – 1.35]  | [0.87 – 1.16] | [0.83 – 1.27]  | [0.96 – 1.43]  | [1.00 – 1.35] | [0.99 – 1.32] | [0.92 – 1.53]  | [0.87 – 1.48]  |
| Govt efficacy                          | 0.88            | 0.75            | 1.07           | 1.03          | 0.97           | 1.06           | 0.9           | 1.02          | 0.95           | 0.91           |
|                                        | [0.57 – 1.36]   | [0.56 – 1.01]   | [0.81 – 1.42]  | [0.85 – 1.25] | [0.74 – 1.28]  | [0.78 – 1.46]  | [0.72 – 1.12] | [0.83 – 1.25] | [0.66 – 1.39]  | [0.65 – 1.29]  |
| Perceived infection risk               | 0.94            | 1.56 ***        | 1.26 *         | 1.05          | 1.03           | 0.93           | 0.98          | 1.02          | 0.98           | 1.21           |
|                                        | [0.69 – 1.28]   | [1.25 – 1.94]   | [1.03 – 1.53]  | [0.91 – 1.21] | [0.84 – 1.27]  | [0.75 – 1.14]  | [0.84 – 1.14] | [0.88 – 1.17] | [0.73 – 1.31]  | [0.92 – 1.58]  |
| Worry about COVID                      | 1.21            | 1.04            | 1.13           | 1.39 ***      | 1.63 ***       | 1.54 ***       | 1.42 ***      | 1.34 ***      | 1.23           | 1.17           |
|                                        | [0.89 – 1.62]   | [0.84 – 1.28]   | [0.93 – 1.37]  | [1.20 – 1.62] | [1.35 – 1.98]  | [1.26 – 1.89]  | [1.23 – 1.65] | [1.15 – 1.55] | [0.92 – 1.64]  | [0.89 – 1.53]  |
| Observations                           | 698             | 1142            | 1314           | 1844          | 1094           | 1249           | 1772          | 1702          | 693            | 680            |
| R <sup>2</sup> Tjur                    | 0.086           | 0.181           | 0.169          | 0.167         | 0.183          | 0.185          | 0.160         | 0.182         | 0.200          | 0.261          |

Odds ratios [95CI] shown, all continuous measures were standardized (scaled and mean-centered) prior to analysis. For space, samples are defined by their two character ISO country code and a letter denoting participant source (D, Dynata; P, Prolific; R, Respondi). <sup>a</sup>Gender is unstandardized. \*p < .05, \*\*p < .01, \*\*\* p < .001



Table S7

Results of multi-level model (samples nested by country and month) adjusting for survey-level variables.

|                                                         | <i>OR</i>     | <i>CI</i>    |
|---------------------------------------------------------|---------------|--------------|
| (Intercept)                                             | 6.59 ***      | 4.00 – 10.84 |
| Age                                                     | 1.20 ***      | 1.15 – 1.25  |
| Gender (Female)                                         | 0.58 ***      | 0.54 – 0.63  |
| Education                                               | 1.02          | 0.98 – 1.07  |
| Numeracy                                                | 1.02          | 0.98 – 1.05  |
| Politics (Conservative)                                 | 0.93 ***      | 0.89 – 0.97  |
| Prosociality                                            | 1.06 **       | 1.02 – 1.10  |
| General social trust                                    | 1.04          | 1.00 – 1.08  |
| General trust: Experts                                  | 1.30 ***      | 1.24 – 1.36  |
| General trust: Govt                                     | 1.05          | 1.00 – 1.11  |
| COVID trust: Politicians                                | 1.06          | 0.99 – 1.13  |
| COVID Trust: National sci/med advisors                  | 1.19 ***      | 1.13 – 1.26  |
| COVID Trust: Independent scientists                     | 0.94 *        | 0.90 – 0.99  |
| COVID Trust: WHO                                        | 1.23 ***      | 1.17 – 1.29  |
| Personal efficacy                                       | 1.01          | 0.96 – 1.05  |
| Govt efficacy                                           | 1.00          | 0.94 – 1.06  |
| Perceived infection risk                                | 1.15 ***      | 1.11 – 1.20  |
| Worry about COVID                                       | 1.44 ***      | 1.38 – 1.50  |
| Days since first case <sup>a</sup>                      | 0.91          | 0.62 – 1.35  |
| Total confirmed cases <sup>a</sup>                      | 0.46 ***      | 0.30 – 0.70  |
| Total confirmed deaths <sup>a</sup>                     | 3.07 ***      | 1.78 – 5.29  |
| Government intervention (Stringency Index) <sup>a</sup> | 0.93          | 0.83 – 1.05  |
| <b>Random effects</b>                                   |               |              |
| $\sigma^2$                                              | 3.29          |              |
| $\tau_{00}$ Country                                     | 0.18          |              |
| $\tau_{00}$ Month                                       | 0.24          |              |
| Intraclass Correlation Coefficient                      | 0.11          |              |
| $N_{\text{Country}}$                                    | 10            |              |
| $N_{\text{Month}}$                                      | 6             |              |
| Observations                                            | 19216         |              |
| Marginal $R^2$ / Conditional $R^2$                      | 0.218 / 0.306 |              |

Odds ratios [95CI] based on standardized (scaled and mean centered) continuous variables, except for gender which is unstandardized. <sup>a</sup> Denotes variables measured at the level of country and month of survey; due to the small number of countries and timepoints included in the model these estimates are biased and should be treated with caution (see Bryan & Jenkins, 2016; <https://doi.org/10.1093/esr/jcv059>). \* $p < .05$ , \*\* $p < .01$ , \*\*\* $p < .001$ .

Table S8

Result of logistic regression models predicting vaccine acceptance, including or excluding general vaccine attitudes.

|                                        | Base model                     |                                |                                | Including general vaccine attitudes |                                |                                |
|----------------------------------------|--------------------------------|--------------------------------|--------------------------------|-------------------------------------|--------------------------------|--------------------------------|
|                                        | UK Prolific (Sep)<br><i>OR</i> | UK Respondi (Sep)<br><i>OR</i> | UK Respondi (Oct)<br><i>OR</i> | UK Prolific (Sep)<br><i>OR</i>      | UK Respondi (Sep)<br><i>OR</i> | UK Respondi (Oct)<br><i>OR</i> |
| (Intercept)                            | 4.14 ***<br>[3.47 – 4.98]      | 5.56 ***<br>[4.57 – 6.81]      | 4.91 ***<br>[4.05 – 6.00]      | 4.28 ***<br>[3.57 – 5.17]           | 6.17 ***<br>[5.02 – 7.67]      | 5.40 ***<br>[4.39 – 6.69]      |
| Age                                    | 1.12<br>[0.99 – 1.27]          | 1.39 ***<br>[1.21 – 1.59]      | 1.37 ***<br>[1.20 – 1.58]      | 1.15 *<br>[1.01 – 1.31]             | 1.32 ***<br>[1.15 – 1.52]      | 1.25 **<br>[1.08 – 1.45]       |
| Gender (Female)                        | 0.62 ***<br>[0.49 – 0.79]      | 0.50 ***<br>[0.38 – 0.64]      | 0.44 ***<br>[0.34 – 0.57]      | 0.63 ***<br>[0.49 – 0.80]           | 0.49 ***<br>[0.37 – 0.64]      | 0.43 ***<br>[0.33 – 0.57]      |
| Education                              | 1.02<br>[0.91 – 1.15]          | 1.11<br>[0.98 – 1.27]          | 1.18 *<br>[1.04 – 1.34]        | 1.00<br>[0.88 – 1.13]               | 1.08<br>[0.94 – 1.23]          | 1.14<br>[1.00 – 1.31]          |
| Numeracy                               | 1.12<br>[0.99 – 1.26]          | 1.00<br>[0.88 – 1.14]          | 1.00<br>[0.88 – 1.13]          | 1.06<br>[0.93 – 1.20]               | 0.93<br>[0.82 – 1.07]          | 0.87 *<br>[0.76 – 0.99]        |
| Politics (Conservative)                | 0.85 *<br>[0.74 – 0.97]        | 0.88<br>[0.77 – 1.01]          | 0.86 *<br>[0.75 – 0.99]        | 0.85 *<br>[0.74 – 0.98]             | 0.87<br>[0.75 – 1.01]          | 0.85 *<br>[0.73 – 0.98]        |
| Prosociality                           | 1.11<br>[0.98 – 1.26]          | 1.09<br>[0.96 – 1.25]          | 1.07<br>[0.94 – 1.23]          | 1.10<br>[0.96 – 1.25]               | 1.08<br>[0.94 – 1.24]          | 1.04<br>[0.90 – 1.20]          |
| General social trust                   | 1.03<br>[0.91 – 1.17]          | 1.09<br>[0.96 – 1.25]          | 0.97<br>[0.85 – 1.11]          | 1.03<br>[0.91 – 1.17]               | 1.04<br>[0.90 – 1.20]          | 0.96<br>[0.83 – 1.11]          |
| General trust: Experts                 | 1.39 ***<br>[1.20 – 1.60]      | 1.23 **<br>[1.06 – 1.44]       | 1.45 ***<br>[1.24 – 1.70]      | 1.28 **<br>[1.11 – 1.49]            | 1.11<br>[0.95 – 1.31]          | 1.29 **<br>[1.09 – 1.53]       |
| General trust: Govt                    | 1.27 **<br>[1.08 – 1.51]       | 1.14<br>[0.95 – 1.37]          | 1.03<br>[0.86 – 1.22]          | 1.24 *<br>[1.05 – 1.48]             | 1.16<br>[0.96 – 1.40]          | 0.99<br>[0.82 – 1.19]          |
| COVID trust: Politicians               | 0.93<br>[0.76 – 1.14]          | 1.11<br>[0.88 – 1.39]          | 1.26 *<br>[1.01 – 1.56]        | 0.95<br>[0.77 – 1.17]               | 1.17<br>[0.92 – 1.48]          | 1.35 *<br>[1.07 – 1.70]        |
| COVID Trust: National sci/med advisors | 1.14<br>[0.97 – 1.34]          | 1.25 *<br>[1.04 – 1.50]        | 1.29 **<br>[1.07 – 1.56]       | 1.12<br>[0.94 – 1.32]               | 1.14<br>[0.94 – 1.38]          | 1.20<br>[0.98 – 1.47]          |
| COVID Trust: Independent scientists    | 0.93<br>[0.80 – 1.07]          | 0.88<br>[0.74 – 1.04]          | 1.00<br>[0.85 – 1.17]          | 0.95<br>[0.82 – 1.11]               | 0.90<br>[0.75 – 1.07]          | 0.95<br>[0.80 – 1.13]          |
| COVID Trust: WHO                       | 1.45 ***<br>[1.25 – 1.68]      | 1.32 **<br>[1.11 – 1.57]       | 1.04<br>[0.87 – 1.24]          | 1.41 ***<br>[1.21 – 1.64]           | 1.33 **<br>[1.11 – 1.59]       | 1.03<br>[0.85 – 1.25]          |
| Personal efficacy                      | 1.10<br>[0.96 – 1.25]          | 1.03<br>[0.89 – 1.18]          | 1.03<br>[0.89 – 1.18]          | 1.06<br>[0.93 – 1.22]               | 1.00<br>[0.86 – 1.16]          | 0.98<br>[0.84 – 1.14]          |
| Govt efficacy                          | 1.00<br>[0.84 – 1.20]          | 0.95<br>[0.77 – 1.17]          | 1.04<br>[0.86 – 1.27]          | 1.01<br>[0.84 – 1.22]               | 0.95<br>[0.77 – 1.18]          | 1.08<br>[0.88 – 1.33]          |
| Perceived infection risk               | 1.04<br>[0.90 – 1.18]          | 1.09<br>[0.94 – 1.26]          | 0.99<br>[0.86 – 1.13]          | 1.02<br>[0.88 – 1.17]               | 1.12<br>[0.96 – 1.31]          | 0.97<br>[0.83 – 1.12]          |
| Worry about COVID                      | 1.37 ***<br>[1.19 – 1.57]      | 1.56 ***<br>[1.36 – 1.80]      | 1.43 ***<br>[1.23 – 1.65]      | 1.36 ***<br>[1.18 – 1.57]           | 1.47 ***<br>[1.26 – 1.70]      | 1.39 ***<br>[1.19 – 1.63]      |
| General vaccine attitudes              |                                |                                |                                | 1.69 ***<br>[1.51 – 1.89]           | 2.08 ***<br>[1.84 – 2.37]      | 2.32 ***<br>[2.02 – 2.66]      |
| Observations                           | 1845                           | 1772                           | 1702                           | 1839                                | 1767                           | 1698                           |
| R <sup>2</sup> Tjur                    | 0.192                          | 0.174                          | 0.192                          | 0.235                               | 0.247                          | 0.281                          |

Odds ratios [95CI] based on standardized (scaled and mean centered) continuous variables except for gender which is unstandardized.

\*p &lt; .05, \*\*p &lt; .01, \*\*\* p &lt; .001

**STROBE 2007 (v4) checklist of items to be included in reports of observational studies in epidemiology\***  
**Checklist for cohort, case-control, and cross-sectional studies (combined)**

| Section/Topic             | Item # | Recommendation                                                                                                                                                                                                                                                                                                                                                                                                                                                         | Reported on page #      |
|---------------------------|--------|------------------------------------------------------------------------------------------------------------------------------------------------------------------------------------------------------------------------------------------------------------------------------------------------------------------------------------------------------------------------------------------------------------------------------------------------------------------------|-------------------------|
| Title and abstract        | 1      | (a) Indicate the study's design with a commonly used term in the title or the abstract                                                                                                                                                                                                                                                                                                                                                                                 | 1                       |
|                           |        | (b) Provide in the abstract an informative and balanced summary of what was done and what was found                                                                                                                                                                                                                                                                                                                                                                    | 2                       |
| <b>Introduction</b>       |        |                                                                                                                                                                                                                                                                                                                                                                                                                                                                        |                         |
| Background/rationale      | 2      | Explain the scientific background and rationale for the investigation being reported                                                                                                                                                                                                                                                                                                                                                                                   | 4                       |
| Objectives                | 3      | State specific objectives, including any pre-specified hypotheses                                                                                                                                                                                                                                                                                                                                                                                                      | 6                       |
| <b>Methods</b>            |        |                                                                                                                                                                                                                                                                                                                                                                                                                                                                        |                         |
| Study design              | 4      | Present key elements of study design early in the paper                                                                                                                                                                                                                                                                                                                                                                                                                | 7                       |
| Setting                   | 5      | Describe the setting, locations, and relevant dates, including periods of recruitment, exposure, follow-up, and data collection                                                                                                                                                                                                                                                                                                                                        | 11                      |
| Participants              | 6      | (a) <i>Cohort study</i> —Give the eligibility criteria, and the sources and methods of selection of participants. Describe methods of follow-up<br><i>Case-control study</i> —Give the eligibility criteria, and the sources and methods of case ascertainment and control selection. Give the rationale for the choice of cases and controls<br><i>Cross-sectional study</i> —Give the eligibility criteria, and the sources and methods of selection of participants | 7                       |
|                           |        | (b) <i>Cohort study</i> —For matched studies, give matching criteria and number of exposed and unexposed<br><i>Case-control study</i> —For matched studies, give matching criteria and the number of controls per case                                                                                                                                                                                                                                                 | -                       |
| Variables                 | 7      | Clearly define all outcomes, exposures, predictors, potential confounders, and effect modifiers. Give diagnostic criteria, if applicable                                                                                                                                                                                                                                                                                                                               | 8, Table S1             |
| Data sources/ measurement | 8*     | For each variable of interest, give sources of data and details of methods of assessment (measurement). Describe comparability of assessment methods if there is more than one group                                                                                                                                                                                                                                                                                   | 7                       |
| Bias                      | 9      | Describe any efforts to address potential sources of bias                                                                                                                                                                                                                                                                                                                                                                                                              | 11                      |
| Study size                | 10     | Explain how the study size was arrived at                                                                                                                                                                                                                                                                                                                                                                                                                              | 7                       |
| Quantitative variables    | 11     | Explain how quantitative variables were handled in the analyses. If applicable, describe which groupings were chosen and why                                                                                                                                                                                                                                                                                                                                           | 8                       |
| Statistical methods       | 12     | (a) Describe all statistical methods, including those used to control for confounding                                                                                                                                                                                                                                                                                                                                                                                  | 11                      |
|                           |        | (b) Describe any methods used to examine subgroups and interactions                                                                                                                                                                                                                                                                                                                                                                                                    | 11                      |
|                           |        | (c) Explain how missing data were addressed                                                                                                                                                                                                                                                                                                                                                                                                                            | 10 (footnote), Table S3 |
|                           |        | (d) <i>Cohort study</i> —If applicable, explain how loss to follow-up was addressed                                                                                                                                                                                                                                                                                                                                                                                    | -                       |

|                          |     |                                                                                                                                                                                                                                                                                                                                                                                                               |                                                             |
|--------------------------|-----|---------------------------------------------------------------------------------------------------------------------------------------------------------------------------------------------------------------------------------------------------------------------------------------------------------------------------------------------------------------------------------------------------------------|-------------------------------------------------------------|
|                          |     | <i>Case-control study</i> —If applicable, explain how matching of cases and controls was addressed<br><i>Cross-sectional study</i> —If applicable, describe analytical methods taking account of sampling strategy<br>(e) Describe any sensitivity analyses                                                                                                                                                   | 12(footnote), Table S6                                      |
| <b>Results</b>           |     |                                                                                                                                                                                                                                                                                                                                                                                                               |                                                             |
| Participants             | 13* | (a) Report numbers of individuals at each stage of study—eg numbers potentially eligible, examined for eligibility, confirmed eligible, included in the study, completing follow-up, and analysed<br>(b) Give reasons for non-participation at each stage<br>(c) Consider use of a flow diagram                                                                                                               | 11 (Table 1), Tables S6,S7<br>7<br>-                        |
| Descriptive data         | 14* | (a) Give characteristics of study participants (eg demographic, clinical, social) and information on exposures and potential confounders<br>(b) Indicate number of participants with missing data for each variable of interest<br>(c) <i>Cohort study</i> —Summarise follow-up time (eg, average and total amount)                                                                                           | 11 (Table 1), Tables S4, S5<br>10 (footnote), Table S3<br>- |
| Outcome data             | 15* | <i>Cohort study</i> —Report numbers of outcome events or summary measures over time<br><i>Case-control study</i> —Report numbers in each exposure category, or summary measures of exposure<br><i>Cross-sectional study</i> —Report numbers of outcome events or summary measures                                                                                                                             | -<br>-<br>11                                                |
| Main results             | 16  | (a) Give unadjusted estimates and, if applicable, confounder-adjusted estimates and their precision (eg, 95% confidence interval). Make clear which confounders were adjusted for and why they were included<br>(b) Report category boundaries when continuous variables were categorized<br>(c) If relevant, consider translating estimates of relative risk into absolute risk for a meaningful time period | 12, Figure S1,<br>-<br>-                                    |
| Other analyses           | 17  | Report other analyses done—eg analyses of subgroups and interactions, and sensitivity analyses                                                                                                                                                                                                                                                                                                                |                                                             |
| <b>Discussion</b>        |     |                                                                                                                                                                                                                                                                                                                                                                                                               |                                                             |
| Key results              | 18  | Summarise key results with reference to study objectives                                                                                                                                                                                                                                                                                                                                                      | 14                                                          |
| Limitations              | 19  | Discuss limitations of the study, taking into account sources of potential bias or imprecision. Discuss both direction and magnitude of any potential bias                                                                                                                                                                                                                                                    | 16                                                          |
| Interpretation           | 20  | Give a cautious overall interpretation of results considering objectives, limitations, multiplicity of analyses, results from similar studies, and other relevant evidence                                                                                                                                                                                                                                    | 15                                                          |
| Generalisability         | 21  | Discuss the generalisability (external validity) of the study results                                                                                                                                                                                                                                                                                                                                         | 16                                                          |
| <b>Other information</b> |     |                                                                                                                                                                                                                                                                                                                                                                                                               |                                                             |
| Funding                  | 22  | Give the source of funding and the role of the funders for the present study and, if applicable, for the original study on which the present article is based                                                                                                                                                                                                                                                 | 20                                                          |

1  
2 \*Give information separately for cases and controls in case-control studies and, if applicable, for exposed and unexposed groups in cohort and cross-sectional studies.

3 **Note:** An Explanation and Elaboration article discusses each checklist item and gives methodological background and published examples of transparent reporting. The STROBE  
4 checklist is best used in conjunction with this article (freely available on the Web sites of PLoS Medicine at <http://www.plosmedicine.org/>, Annals of Internal Medicine at  
5 <http://www.annals.org/>, and Epidemiology at <http://www.epidem.com/>). Information on the STROBE Initiative is available at [www.strobe-statement.org](http://www.strobe-statement.org).  
6  
7  
8  
9  
10  
11  
12  
13  
14  
15  
16  
17  
18  
19  
20  
21  
22  
23  
24  
25  
26  
27  
28  
29  
30  
31  
32  
33  
34  
35  
36  
37  
38  
39  
40  
41  
42  
43  
44  
45  
46

For peer review only
