# Supplementary material for: Correlates of intended COVID-19 vaccine acceptance across time and countries: results from a series of cross-sectional surveys
Source: PubMed Central journal article supplement — BMJ Open. 2021 Aug 2;11(8):e048025. doi: 10.1136/bmjopen-2020-048025 (PMC8331327; doi:10.1136/bmjopen-2020-048025), 2021-08-02
Supplement: bmjopen-2020-048025supp001.pdf [file bmjopen-2020-048025supp001.pdf]

## Correlates of intended COVID-19 vaccine acceptance across time and countries: Results from a series of cross-sectional surveys

### Supplementary material

Table S1

Survey items and wording

| Variable                     | Wording                                                                                                                                       | Response                                                                                                                                                                                                                                                                                                                                                                                                                                      |
|------------------------------|-----------------------------------------------------------------------------------------------------------------------------------------------|-----------------------------------------------------------------------------------------------------------------------------------------------------------------------------------------------------------------------------------------------------------------------------------------------------------------------------------------------------------------------------------------------------------------------------------------------|
| Gender                       | What is your gender?                                                                                                                          | 0 =Male, 1= Female, 'Other' and 'Prefer not to say' (included in Prolific samples only) coded as missing.                                                                                                                                                                                                                                                                                                                                     |
| Age                          | What is your age?                                                                                                                             | Age in years                                                                                                                                                                                                                                                                                                                                                                                                                                  |
| Education                    | Please indicate your highest educational qualification                                                                                        | 1 = No formal education above age 16, 2 = Professional or technical qualifications above age 16, 3 = School education up to age 18, 4 = Degree (Bachelors) or equivalent, 5 = Degree (Masters) or other postgraduate qualification, 6 = Doctorate [In France] 1 = No diploma, 2 =Primary school certificate, 3 = BEPC - Brevet des colleges, 4 = CAP / BEP, 5 = BAC / professional certificate / technical certificate, 6 = BAC +2 and above. |
| Numeracy (summed; range 1-5) | Adaptive Berlin Numeracy test (2-3items, see Cokely et al., 2012 for details).<br>Which represents the highest risk of something happening?   | Scores range 1-4<br>1 = '1 in 10' (correct), 2 = '1 in 1000', 3 = '1 in 100'                                                                                                                                                                                                                                                                                                                                                                  |
| Politics                     | Where do you feel your political views lie on a spectrum of left wing (or liberal) to right wing (or conservative)?                           | 1 = Very liberal/left, 7 = Very conservative/right                                                                                                                                                                                                                                                                                                                                                                                            |
| Prosociality                 | To what extent do you think it's important to do things for the benefit of others and society even if they have some costs to you personally? | 1 = Not at all, 7 = Very much so                                                                                                                                                                                                                                                                                                                                                                                                              |

|                                        |                                                                                                                                             |                                                          |
|----------------------------------------|---------------------------------------------------------------------------------------------------------------------------------------------|----------------------------------------------------------|
| General social trust                   | Generally speaking, would you say most people can be trusted, or that you can't be too careful in dealing with people?                      | 1 = Can't be too careful, 7 = Most people can be trusted |
| General trust: Experts (scale)         | How much do you trust each of the following? -<br>Medical doctors and nurses                                                                | 1 = Cannot be trusted at all, 5 = Can be trusted a lot   |
|                                        | How much do you trust each of the following? -<br>Scientists                                                                                | 1 = Cannot be trusted at all, 5 = Can be trusted a lot   |
|                                        | How much do you trust each of the following? -<br>Scientific knowledge                                                                      | 1 = Cannot be trusted at all, 5 = Can be trusted a lot   |
| General trust: Govt (scale)            | How much do you trust each of the following? -<br>Civil servants or public officials in the country you are living in                       | 1 = Cannot be trusted at all, 5 = Can be trusted a lot   |
|                                        | How much do you trust each of the following? -<br>The current government of the country you are living in                                   | 1 = Cannot be trusted at all, 5 = Can be trusted a lot   |
|                                        | How much do you trust each of the following? -<br>Politicians in the country you are living in                                              | 1 = Cannot be trusted at all, 5 = Can be trusted a lot   |
| COVID trust: Politicians               | How much do you trust the country's politicians to deal effectively with the pandemic?                                                      | 1 = Not at all, 7 = Very much                            |
| COVID Trust: National sci/med advisors | How much do you trust the country's national scientific and medical advisors to know the best measures to take in the face of the pandemic? | 1 = Not at all, 7 = Very much                            |
| COVID Trust: Independent scientists    | How much do you trust experts who are not connected with the government who are commenting on measures planned for the pandemic?            | 1 = Not at all, 7 = Very much                            |
| COVID Trust: WHO                       | How much do you trust the World Health Organisation to know the best measures to take in the face of the pandemic?                          | 1 = Not at all, 7 = Very much                            |
| Personal efficacy                      | To what extent do you feel that the personal actions you are taking to try to limit the spread of coronavirus make a difference?            | 1 = Not at all, 7 = Very much                            |
| Govt efficacy                          | To what extent do you feel the actions that your country is taking to limit the spread of coronavirus make a difference?                    | 1 = Not at all, 7 = Very much                            |

|                                  |                                                                                                                                                                                                                   |                                                      |
|----------------------------------|-------------------------------------------------------------------------------------------------------------------------------------------------------------------------------------------------------------------|------------------------------------------------------|
| Perceived infection risk (scale) | How likely do you think it is that you will be directly and personally affected by the following in the next 6 months? - Catching the coronavirus/COVID-19                                                        | 1= Not at all likely, 7 = Very likely                |
|                                  | How likely do you think it is that your friends and family in the country you are currently living in will be directly affected by the following in the next 6 months? - Catching the coronavirus/COVID-19        | 1= Not at all likely, 7 = Very likely                |
|                                  | How much do you agree or disagree with the following statements? - I will probably get sick with the coronavirus/COVID-19.                                                                                        | 1 = Strongly disagree, 5 = Strongly agree (rescaled) |
| Worry about COVID                | How worried are you personally about the following issues at present? - Coronavirus/COVID-19                                                                                                                      | 1 = Not at all worried, 7 = Very worried             |
| Vaccine - acceptance             | If a vaccine were to be available for the coronavirus/COVID-19 now: - Would you get vaccinated yourself?                                                                                                          | 0 = No, 1 = Yes                                      |
| Vaccine – recommend to others    | If a vaccine were to be available for the coronavirus/COVID-19 now: - Would you recommend vulnerable friends/family to get vaccinated?                                                                            | 0 = No, 1 = Yes                                      |
| General vaccine attitudes        | Please let us know how much you agree or disagree with the following statements about vaccines in general: - I believe that vaccines are a safe and reliable way to help avert the spread of preventable diseases | 1 = Strongly disagree, 5 = Strongly agree            |
|                                  | Please let us know how much you agree or disagree with the following statements about vaccines in general: - Vaccinations are one of the most significant contributions to public health                          | 1 = Strongly disagree, 5 = Strongly agree            |

Table S2

Percentage of missing values for predictor and outcome variables across all samples.

| Variable                                     | AU_D<br>(Mar) | CN_R<br>(Apr) | DE_R<br>(Mar) | ES_R<br>(Mar) | ES_R<br>(May) | FR_B<br>(Apr) | IT_R<br>(Mar) | JP_R<br>(Apr) | KR_R<br>(Apr) | MX_R<br>(Mar) | MX_R<br>(May) | SE_R<br>(Apr) | SE_R<br>(Mar) | UK_<br>P<br>(Jul) | UK_P<br>(Mar) | UK_P<br>(May) | UK_P<br>(Sep) | UK_<br>R<br>(Jul) | UK_R<br>(Jun) | UK_R<br>(May) | UK_R<br>(Oct) | UK_R<br>(Sep) | US_P<br>(Mar) | US_R<br>(May) | US_R<br>(Sep) |
|----------------------------------------------|---------------|---------------|---------------|---------------|---------------|---------------|---------------|---------------|---------------|---------------|---------------|---------------|---------------|-------------------|---------------|---------------|---------------|-------------------|---------------|---------------|---------------|---------------|---------------|---------------|---------------|
| Age                                          | 5.4           | 0.6           | 3.9           | 2.1           | 1.6           | 0.0           | 20.9          | 2.3           | 0.4           | 8.8           | 1.1           | 1.7           | 4.6           | 0.1               | 0.0           | 0.3           | 0.1           | 1.8               | 1.2           | 1.5           | 1.0           | 1.7           | 0.1           | 1.3           | 0.0           |
| Gender [Female]                              | 0.0           | 0.0           | 0.0           | 0.0           | 0.0           | 0.0           | 0.0           | 0.0           | 0.0           | 0.0           | 0.0           | 0.0           | 0.0           | 0.5               | 0.4           | 0.3           | 0.6           | 0.0               | 0.0           | 0.0           | 0.0           | 0.0           | 0.4           | 0.0           | 0.1           |
| Education                                    | 5.6           | 0.3           | 3.9           | 1.7           | 0.6           | 0.0           | 20.1          | 1.0           | 0.3           | 7.8           | 0.3           | 0.4           | 3.9           | 0.0               | 0.0           | 0.0           | 0.0           | 0.5               | -             | 0.1           | 0.1           | 0.5           | 0.0           | 0.3           | -             |
| Numeracy                                     | 6.7           | 1.9           | 6.6           | 3.1           | 2.7           | 1.1           | 21.1          | 6.2           | 2.0           | 8.1           | 0.3           | 3.1           | 5.6           | 0.1               | 0.1           | 0.3           | 0.2           | 3.5               | 2.2           | 1.8           | 0.9           | 2.3           | 0.1           | 1.4           | 0.2           |
| Politics<br>[Conservative]                   | 5.6           | -             | 4.1           | 2.1           | 0.6           | -             | 20.3          | 9.2           | 0.1           | 7.9           | 0.9           | 0.9           | 4.1           | 0.1               | 0.0           | 0.1           | 0.1           | 0.6               | 1.2           | 0.3           | 0.3           | 0.8           | 0.0           | 0.4           | 0.2           |
| Prosociality                                 | 1.0           | 0.1           | 0.3           | 0.7           | 0.1           | 0.0           | 1.7           | 0.0           | 0.1           | 0.7           | 0.0           | 0.0           | 0.7           | 0.0               | 0.0           | 0.0           | 0.0           | 0.5               | 0.0           | 0.6           | 0.1           | 0.2           | 0.0           | 0.1           | 0.0           |
| General social trust                         | 0.0           | 0.0           | 0.1           | 0.3           | 0.3           | 0.0           | 0.4           | 0.0           | 0.1           | 0.0           | 0.3           | 0.4           | 0.0           | 0.0               | 0.0           | 0.0           | 0.1           | 0.0               | 0.0           | 0.1           | 0.1           | 0.2           | 0.0           | 0.1           | 0.0           |
| General trust: Experts                       | 0.0           | 0.0           | 0.3           | 0.0           | 0.3           | 0.0           | 0.3           | 0.0           | 0.1           | 0.4           | 0.1           | 0.1           | 0.0           | 0.0               | 0.0           | 0.1           | 0.0           | 0.1               | 0.4           | 0.3           | 0.1           | 0.4           | 0.0           | 0.0           | 0.0           |
| General trust: Govt                          | 0.1           | -             | 0.3           | 0.0           | 0.1           | 0.0           | 0.9           | 0.1           | 0.1           | 0.3           | 0.3           | 0.1           | 0.0           | 0.0               | 0.0           | 0.1           | 0.0           | 0.0               | 0.0           | 0.2           | 0.0           | 0.2           | 0.0           | 0.0           | 0.1           |
| COVID trust:<br>Politicians                  | 3.4           | -             | 1.7           | 1.3           | 0.0           | 0.0           | 10.0          | 0.4           | 0.1           | 4.8           | 0.3           | 0.1           | 2.3           | 0.1               | 0.0           | 0.0           | 0.0           | 0.1               | 0.2           | 0.1           | 0.0           | 0.2           | 0.0           | 0.1           | 0.0           |
| COVID Trust:<br>National sci/med<br>advisors | 3.4           | -             | 1.7           | 1.3           | 0.1           | 0.0           | 10.0          | 0.3           | 0.0           | 4.8           | 0.3           | 0.1           | 2.3           | 0.0               | 0.0           | 0.0           | 0.0           | 0.1               | 0.2           | 0.1           | 0.0           | 0.1           | 0.0           | 0.3           | -             |
| COVID Trust:<br>Independent scientists       | 3.4           | -             | 1.7           | 1.6           | 0.1           | 0.0           | 10.1          | 0.3           | 0.0           | 4.8           | 0.3           | 0.0           | 2.3           | 0.0               | 0.0           | 0.0           | 0.0           | 0.1               | -             | 0.2           | 0.0           | 0.1           | 0.1           | 0.3           | -             |
| COVID Trust: WHO                             | 3.4           | -             | 2.0           | 1.4           | 0.0           | 0.0           | 10.0          | 0.6           | 0.1           | 4.9           | 0.3           | 0.0           | 2.3           | 0.0               | 0.0           | 0.1           | 0.0           | 0.2               | 0.2           | 0.2           | 0.0           | 0.1           | 0.1           | 0.3           | -             |
| Personal efficacy                            | 3.7           | -             | 2.0           | 1.3           | 0.0           | 0.0           | 10.3          | 0.6           | 0.1           | 4.8           | 0.3           | 0.0           | 2.4           | 0.0               | 0.1           | 0.0           | 0.2           | 0.2               | 0.4           | 0.3           | 0.1           | 0.2           | 0.0           | 0.3           | 0.0           |
| Govt efficacy                                | 3.6           | -             | 2.0           | 1.4           | 0.3           | 0.0           | 10.4          | 0.4           | 0.1           | 4.8           | 0.6           | 0.0           | 2.4           | 0.0               | 0.0           | 0.0           | 0.1           | 0.2               | 0.2           | 0.3           | 0.0           | 0.1           | 0.0           | 0.3           | 0.1           |
| Perceived infection<br>risk                  | 1.4           | 0.3           | 1.0           | 0.9           | 0.0           | 0.0           | 3.0           | 0.0           | 0.0           | 1.7           | 0.1           | 0.0           | 1.1           | 0.0               | 0.0           | 0.0           | 0.0           | 0.1               | 0.4           | 0.2           | 0.2           | 0.0           | 0.1           | 0.4           | 0.0           |
| Worry about COVID                            | 1.0           | 0.0           | 0.6           | 0.6           | 0.0           | 0.0           | 2.4           | 0.1           | 0.3           | 1.4           | 0.0           | 0.0           | 0.7           | 0.0               | 0.0           | 0.0           | 0.0           | 0.1               | 0.2           | 0.3           | 0.0           | 0.1           | 0.1           | 0.1           | 0.0           |
| Vaccine acceptance                           | 4.0           | 0.1           | 1.9           | 1.4           | 0.1           | 0.0           | 11.4          | 0.1           | 0.1           | 5.8           | 0.3           | 0.4           | 2.4           | 0.1               | 0.0           | 0.0           | 0.0           | 0.2               | 0.2           | 0.3           | 0.1           | 0.1           | 0.1           | 0.1           | 0.0           |
| Vaccine recommend                            | 4.1           | 0.1           | 1.9           | 1.6           | 0.1           | 0.0           | 11.4          | 0.1           | 0.1           | 6.3           | 0.6           | 0.4           | 2.4           | 0.1               | 0.0           | 0.1           | 0.1           | 0.2               | 0.2           | 0.4           | 0.1           | 0.1           | 0.1           | 0.1           | 0.0           |
| Vaccine attitudes                            | -             | -             | -             | -             | -             | -             | -             | -             | -             | -             | -             | -             | -             | -                 | -             | -             | 0.3           | -                 | -             | -             | 0.2           | 0.3           | -             | -             | -             |

“-” indicates variable not included in survey. For space, samples are defined by their two character ISO country code and a letter denoting participant source (B, BVA; D, Dynata; P, Prolific; R, Respondi). Missing gender includes ‘Other’ and ‘prefer’ not to say’ responses (total  $n=35$ ) and missing age includes values outside the range of 18-100 (total  $n=46$ )

Table S3

Gender and age distribution of those participants who answered the vaccine acceptance item (% of each sample; continued on following page)

| Gender  | Age bracket | AU_D1 | CN_R1 | DE_R1 | ES_R1 | ES_R2 | FR_B1 | IT_R1 | JP_R1 | KR_R1 | MX_R1 | MX_R2 | SE_R1 | SE_R2 |
|---------|-------------|-------|-------|-------|-------|-------|-------|-------|-------|-------|-------|-------|-------|-------|
| Male    | 18-24       | 6.0   | 5.7   | 5.2   | 4.5   | 4.7   | 1.2   | 4.8   | 4.9   | 5.6   | 9.8   | 9.9   | 5.3   | 5.7   |
|         | 24-34       | 8.3   | 10.9  | 8.7   | 7.4   | 7.6   | 6.2   | 8.4   | 7.3   | 8.6   | 12.4  | 11.8  | 10.5  | 10.5  |
|         | 35-44       | 8.6   | 9.3   | 8.6   | 10.4  | 10.6  | 7.6   | 9.4   | 8.7   | 9.6   | 10.0  | 10.7  | 9.2   | 9.0   |
|         | 45-54       | 8.2   | 11.3  | 10.0  | 10.9  | 10.7  | 10.2  | 10.7  | 10.2  | 11.2  | 8.9   | 8.3   | 9.8   | 9.5   |
|         | 55-64       | 7.6   | 8.2   | 10.5  | 9.0   | 8.9   | 8.6   | 8.6   | 8.2   | 10.2  | 5.8   | 5.4   | 8.6   | 8.8   |
|         | 65+         | 9.2   | 5.7   | 7.7   | 7.0   | 7.2   | 13.8  | 6.8   | 9.7   | 6.0   | 3.2   | 3.0   | 8.1   | 7.8   |
|         | Missing     | 0.0   | 0.0   | 0.0   | 0.0   | 0.0   | 0.0   | 0.0   | 0.0   | 0.0   | 0.0   | 0.0   | 0.0   | 0.0   |
| Female  | 18-24       | 5.7   | 5.4   | 5.2   | 4.5   | 4.7   | 8.5   | 4.8   | 5.0   | 5.3   | 8.9   | 10.0  | 5.0   | 5.5   |
|         | 24-34       | 9.5   | 10.4  | 8.4   | 7.8   | 7.7   | 8.7   | 8.4   | 7.6   | 8.2   | 12.9  | 12.3  | 10.3  | 10.0  |
|         | 35-44       | 10.1  | 8.9   | 8.4   | 10.9  | 10.7  | 8.4   | 10.5  | 9.2   | 9.2   | 12.1  | 11.3  | 8.9   | 8.5   |
|         | 45-54       | 9.4   | 10.9  | 9.5   | 10.9  | 11.0  | 9.5   | 12.4  | 10.5  | 10.7  | 8.7   | 8.6   | 9.4   | 9.3   |
|         | 55-64       | 7.9   | 7.9   | 9.9   | 9.3   | 8.9   | 6.7   | 7.6   | 8.6   | 9.7   | 5.4   | 5.7   | 8.4   | 8.3   |
|         | 65+         | 9.5   | 5.4   | 7.7   | 7.5   | 7.3   | 10.7  | 7.7   | 10.2  | 5.9   | 2.0   | 2.9   | 6.6   | 7.2   |
|         | Missing     | 0.0   | 0.0   | 0.0   | 0.0   | 0.0   | 0.0   | 0.0   | 0.0   | 0.0   | 0.0   | 0.0   | 0.0   | 0.0   |
| Missing | 18-24       | 0.0   | 0.0   | 0.0   | 0.0   | 0.0   | 0.0   | 0.0   | 0.0   | 0.0   | 0.0   | 0.0   | 0.0   | 0.0   |
|         | 24-34       | 0.0   | 0.0   | 0.0   | 0.0   | 0.0   | 0.0   | 0.0   | 0.0   | 0.0   | 0.0   | 0.0   | 0.0   | 0.0   |
|         | 35-44       | 0.0   | 0.0   | 0.0   | 0.0   | 0.0   | 0.0   | 0.0   | 0.0   | 0.0   | 0.0   | 0.0   | 0.0   | 0.0   |
|         | 45-54       | 0.0   | 0.0   | 0.0   | 0.0   | 0.0   | 0.0   | 0.0   | 0.0   | 0.0   | 0.0   | 0.0   | 0.0   | 0.0   |
|         | 55-64       | 0.0   | 0.0   | 0.0   | 0.0   | 0.0   | 0.0   | 0.0   | 0.0   | 0.0   | 0.0   | 0.0   | 0.0   | 0.0   |
|         | 65+         | 0.0   | 0.0   | 0.0   | 0.0   | 0.0   | 0.0   | 0.0   | 0.0   | 0.0   | 0.0   | 0.0   | 0.0   | 0.0   |
|         | Missing     | 0.0   | 0.0   | 0.0   | 0.0   | 0.0   | 0.0   | 0.0   | 0.0   | 0.0   | 0.0   | 0.0   | 0.0   | 0.0   |

For space, samples are defined by their two character ISO country code and a letter denoting participant source (B, BVA; D, Dynata; P, Prolific; R, Respondi). 'Missing' gender includes responses 'Other' and 'Prefer not to say' - only included in Prolific samples.

Table S3 (continued)

Gender and age distribution of those participants who answered the vaccine acceptance item (% of each sample)

| Gender  | Age bracket | UK_P1 | UK_P3 | UK_P4 | UK_P5 | UK_R2 | UK_R3 | UK_R4 | UK_R5 | UK_R6 | US_P1 | US_R2 | US_R3 |     |
|---------|-------------|-------|-------|-------|-------|-------|-------|-------|-------|-------|-------|-------|-------|-----|
| Male    | 18-24       | 5.6   | 7.2   | 7.1   | 11.7  | 5.8   | 4.2   | 5.8   | 5.9   | 5.5   | 5.9   | 6.3   | 3.4   |     |
|         | 24-34       | 10.0  | 8.8   | 9.4   | 15.1  | 8.7   | 8.0   | 8.8   | 8.9   | 7.8   | 10.1  | 9.6   | 12.5  |     |
|         | 35-44       | 8.3   | 9.3   | 9.4   | 7.7   | 9.2   | 9.4   | 9.3   | 9.3   | 8.7   | 9.0   | 8.7   | 12.0  |     |
|         | 45-54       | 8.5   | 8.6   | 8.5   | 6.4   | 9.2   | 9.6   | 9.2   | 9.2   | 10.2  | 9.0   | 8.7   | 5.7   |     |
|         | 55-64       | 11.7  | 9.3   | 8.2   | 5.7   | 8.3   | 8.4   | 8.2   | 8.2   | 8.4   | 8.6   | 8.9   | 9.2   |     |
|         | 65+         | 4.7   | 5.5   | 4.6   | 1.7   | 6.7   | 7.0   | 7.0   | 7.0   | 7.0   | 7.3   | 6.4   | 6.7   | 6.4 |
|         | Missing     | 0.0   | 0.2   | 0.0   | 0.0   | 0.0   | 0.0   | 0.0   | 0.0   | 0.0   | 0.0   | 0.0   | 0.0   | 0.0 |
| Female  | 18-24       | 5.6   | 5.1   | 6.1   | 10.9  | 6.3   | 7.0   | 6.3   | 6.2   | 5.7   | 4.9   | 6.6   | 5.3   |     |
|         | 24-34       | 8.8   | 9.8   | 9.1   | 11.5  | 9.5   | 10.0  | 9.6   | 9.5   | 8.4   | 11.3  | 10.0  | 11.3  |     |
|         | 35-44       | 9.3   | 9.9   | 8.9   | 8.8   | 10.0  | 10.2  | 10.0  | 9.9   | 9.5   | 7.6   | 9.2   | 9.2   |     |
|         | 45-54       | 8.3   | 7.7   | 10.2  | 8.6   | 10.0  | 10.2  | 9.8   | 9.8   | 10.6  | 8.7   | 9.0   | 8.1   |     |
|         | 55-64       | 12.9  | 13.1  | 11.8  | 8.8   | 8.9   | 8.8   | 8.6   | 8.7   | 9.5   | 11.7  | 9.3   | 10.3  |     |
|         | 65+         | 6.1   | 5.1   | 6.3   | 2.7   | 7.2   | 7.0   | 7.5   | 7.5   | 8.4   | 6.6   | 7.0   | 6.3   |     |
|         | Missing     | 0.0   | 0.1   | 0.2   | 0.4   | 0.0   | 0.0   | 0.0   | 0.0   | 0.0   | 0.0   | 0.3   | 0.0   | 0.0 |
| Missing | 18-24       | 0.0   | 0.1   | 0.2   | 0.4   | 0.0   | 0.0   | 0.0   | 0.0   | 0.0   | 0.3   | 0.0   | 0.0   |     |
|         | 24-34       | 0.3   | 0.1   | 0.2   | 0.1   | 0.0   | 0.0   | 0.0   | 0.0   | 0.0   | 0.0   | 0.0   | 0.1   |     |
|         | 35-44       | 0.0   | 0.0   | 0.0   | 0.1   | 0.0   | 0.0   | 0.0   | 0.0   | 0.0   | 0.1   | 0.0   | 0.0   |     |
|         | 45-54       | 0.0   | 0.1   | 0.0   | 0.1   | 0.0   | 0.0   | 0.0   | 0.0   | 0.0   | 0.0   | 0.0   | 0.0   |     |
|         | 55-64       | 0.1   | 0.0   | 0.1   | 0.0   | 0.0   | 0.0   | 0.0   | 0.0   | 0.0   | 0.0   | 0.0   | 0.0   |     |
|         | 65+         | 0.0   | 0.1   | 0.0   | 0.0   | 0.0   | 0.0   | 0.0   | 0.0   | 0.0   | 0.0   | 0.0   | 0.0   |     |

For space, samples are defined by their two character ISO country code and a letter denoting participant source (B, BVA; D, Dynata; P, Prolific; R, Respondi). 'Missing' gender includes responses 'Other' and 'Prefer not to say' - only included in Prolific samples.

Table S4

Descriptive statistics for all samples (Mean (SD)) (continued on following page)

|                                        | ALL              | AUD<br>(Mar)     | CNR<br>(Apr)     | DE R<br>(Mar)    | ES R<br>(Mar)    | ES R<br>(May)    | FR B<br>(Apr)               | IT R<br>(Mar)    | JP R<br>(Apr)    | KR R<br>(Apr)    | MX R<br>(Mar)    | MX R<br>(May)    | SE R<br>(Mar)    | SE R<br>(Apr)    |
|----------------------------------------|------------------|------------------|------------------|------------------|------------------|------------------|-----------------------------|------------------|------------------|------------------|------------------|------------------|------------------|------------------|
| Age                                    | 45.06<br>(16.02) | 46.30<br>(16.44) | 43.21<br>(14.26) | 46.71<br>(15.93) | 46.68<br>(14.99) | 46.00<br>(15.03) | 48.79<br>(16.53)            | 45.91<br>(14.81) | 48.08<br>(16.35) | 45.34<br>(15.51) | 38.69<br>(13.96) | 38.61<br>(14.21) | 45.49<br>(16.02) | 45.49<br>(16.54) |
| Gender (Female)                        | 0.51<br>(0.50)   | 0.51<br>(0.50)   | 0.49<br>(0.50)   | 0.50<br>(0.50)   | 0.51<br>(0.50)   | 0.50<br>(0.50)   | 0.48<br>(0.50)              | 0.50<br>(0.50)   | 0.51<br>(0.50)   | 0.49<br>(0.50)   | 0.50<br>(0.50)   | 0.51<br>(0.50)   | 0.49<br>(0.50)   | 0.49<br>(0.50)   |
| Education                              | 3.42<br>(1.13)   | 3.17<br>(1.12)   | 3.64<br>(0.88)   | 3.07<br>(1.19)   | 3.59<br>(1.08)   | 3.60<br>(1.07)   | 5.00 <sup>a</sup><br>(1.12) | 3.51<br>(1.23)   | 3.56<br>(0.81)   | 3.76<br>(0.79)   | 3.55<br>(0.94)   | 3.74<br>(0.88)   | 3.30<br>(1.06)   | 3.34<br>(1.01)   |
| Numeracy                               | 2.66<br>(1.11)   | 2.41<br>(1.06)   | 2.83<br>(1.25)   | 2.53<br>(1.12)   | 2.39<br>(1.03)   | 2.42<br>(0.97)   | 2.18<br>(0.70)              | 2.13<br>(0.71)   | 2.77<br>(1.25)   | 2.60<br>(1.06)   | 2.16<br>(0.90)   | 2.31<br>(0.95)   | 2.52<br>(1.23)   | 2.57<br>(1.21)   |
| Politics (Conservative)                | 3.74<br>(1.41)   | 3.83<br>(1.30)   | -                | 3.79<br>(1.19)   | 3.50<br>(1.43)   | 3.44<br>(1.50)   | -                           | 3.87<br>(1.45)   | 4.09<br>(1.09)   | 3.88<br>(1.20)   | 3.65<br>(1.31)   | 3.57<br>(1.33)   | 3.92<br>(1.59)   | 3.88<br>(1.61)   |
| Prosociality                           | 5.21<br>(1.36)   | 5.23<br>(1.36)   | 5.54<br>(1.19)   | 4.97<br>(1.42)   | 5.74<br>(1.21)   | 5.35<br>(1.34)   | 5.23<br>(1.41)              | 5.76<br>(1.38)   | 4.74<br>(1.42)   | 4.40<br>(1.31)   | 5.34<br>(1.61)   | 5.26<br>(1.53)   | 4.87<br>(1.43)   | 4.63<br>(1.48)   |
| General social trust                   | 3.66<br>(1.71)   | 3.95<br>(1.67)   | 4.96<br>(1.67)   | 3.61<br>(1.65)   | 3.47<br>(1.87)   | 3.29<br>(1.77)   | 2.98<br>(1.62)              | 3.70<br>(1.61)   | 3.85<br>(1.48)   | 3.97<br>(1.50)   | 2.81<br>(1.84)   | 2.94<br>(1.84)   | 3.73<br>(1.73)   | 3.85<br>(1.73)   |
| General trust: Experts                 | 3.97<br>(0.77)   | 3.97<br>(0.79)   | 4.26<br>(0.61)   | 3.90<br>(0.74)   | 4.19<br>(0.72)   | 4.09<br>(0.76)   | 3.76<br>(0.81)              | 4.02<br>(0.74)   | 3.51<br>(0.72)   | 3.74<br>(0.68)   | 4.05<br>(0.85)   | 4.10<br>(0.83)   | 3.90<br>(0.75)   | 3.85<br>(0.75)   |
| General trust: Govt                    | 2.64<br>(0.91)   | 2.96<br>(0.93)   | -                | 3.14<br>(0.92)   | 2.75<br>(0.94)   | 2.54<br>(0.89)   | 2.48<br>(0.90)              | 2.89<br>(0.91)   | 2.46<br>(0.84)   | 2.65<br>(0.81)   | 2.28<br>(1.01)   | 2.35<br>(1.02)   | 3.04<br>(1.00)   | 3.00<br>(1.01)   |
| COVID trust: Politicians               | 3.48<br>(1.87)   | 4.44<br>(1.75)   | -                | 4.80<br>(1.65)   | 4.01<br>(1.88)   | 3.45<br>(1.91)   | 3.33<br>(1.78)              | 4.35<br>(1.74)   | 3.03<br>(1.60)   | 4.24<br>(1.63)   | 3.22<br>(1.99)   | 3.51<br>(1.96)   | 4.13<br>(1.78)   | 4.24<br>(1.83)   |
| COVID Trust: National sci/med advisors | 4.91<br>(1.60)   | 5.34<br>(1.41)   | -                | 5.40<br>(1.43)   | 5.45<br>(1.39)   | 4.92<br>(1.65)   | 4.46<br>(1.73)              | 5.42<br>(1.40)   | 3.90<br>(1.51)   | 5.15<br>(1.37)   | 5.18<br>(1.69)   | 5.28<br>(1.60)   | 4.78<br>(1.67)   | 4.93<br>(1.66)   |
| COVID Trust: Independent scientists    | 4.66<br>(1.55)   | 4.77<br>(1.49)   | -                | 5.11<br>(1.38)   | 5.15<br>(1.39)   | 4.83<br>(1.55)   | 4.62<br>(1.52)              | 4.80<br>(1.45)   | 3.73<br>(1.51)   | 5.03<br>(1.26)   | 5.02<br>(1.68)   | 4.91<br>(1.65)   | 4.66<br>(1.52)   | 4.55<br>(1.48)   |
| COVID Trust: WHO                       | 4.84<br>(1.68)   | 5.19<br>(1.55)   | -                | 5.16<br>(1.52)   | 5.46<br>(1.42)   | 4.88<br>(1.62)   | 4.80<br>(1.61)              | 5.25<br>(1.48)   | 3.12<br>(1.55)   | 3.96<br>(1.51)   | 5.80<br>(1.45)   | 5.58<br>(1.62)   | 5.05<br>(1.45)   | 4.81<br>(1.55)   |
| Personal efficacy                      | 5.22<br>(1.48)   | 5.14<br>(1.45)   | -                | 5.24<br>(1.41)   | 5.31<br>(1.47)   | 5.14<br>(1.47)   | 5.20<br>(1.47)              | 5.31<br>(1.46)   | 4.26<br>(1.42)   | 5.42<br>(1.24)   | 5.36<br>(1.66)   | 5.56<br>(1.53)   | 5.20<br>(1.50)   | 5.26<br>(1.45)   |
| Govt efficacy                          | 3.86<br>(1.78)   | 4.48<br>(1.63)   | -                | 4.68<br>(1.47)   | 4.21<br>(1.77)   | 4.11<br>(1.83)   | 4.22<br>(1.68)              | 4.60<br>(1.60)   | 3.21<br>(1.52)   | 5.08<br>(1.52)   | 3.82<br>(2.06)   | 4.39<br>(1.86)   | 4.30<br>(1.73)   | 4.41<br>(1.67)   |
| Perceived infection risk               | 4.17<br>(1.32)   | 4.16<br>(1.40)   | 3.26<br>(1.37)   | 4.13<br>(1.34)   | 4.46<br>(1.23)   | 4.38<br>(1.26)   | 4.19<br>(1.24)              | 3.93<br>(1.30)   | 4.48<br>(1.20)   | 4.37<br>(1.22)   | 4.16<br>(1.47)   | 4.29<br>(1.43)   | 4.30<br>(1.37)   | 4.37<br>(1.29)   |
| Worry about COVID                      | 5.56<br>(1.52)   | 5.56<br>(1.51)   | 5.37<br>(1.57)   | 5.66<br>(1.49)   | 6.25<br>(1.17)   | 6.11<br>(1.26)   | 5.63<br>(1.43)              | 6.08<br>(1.27)   | 5.83<br>(1.28)   | 5.59<br>(1.29)   | 5.92<br>(1.46)   | 6.06<br>(1.35)   | 5.27<br>(1.55)   | 4.98<br>(1.66)   |
| Vaccine—acceptance                     | 0.76<br>(0.43)   | 0.83<br>(0.38)   | 0.86<br>(0.35)   | 0.81<br>(0.39)   | 0.84<br>(0.37)   | 0.80<br>(0.40)   | 0.70<br>(0.46)              | 0.85<br>(0.35)   | 0.74<br>(0.44)   | 0.86<br>(0.35)   | 0.88<br>(0.32)   | 0.74<br>(0.44)   | 0.66<br>(0.47)   | 0.63<br>(0.48)   |
| Vaccine—recommend to vulnerable others | 0.82<br>(0.38)   | 0.89<br>(0.32)   | 0.87<br>(0.33)   | 0.89<br>(0.31)   | 0.90<br>(0.30)   | 0.82<br>(0.38)   | 0.81<br>(0.40)              | 0.88<br>(0.32)   | 0.80<br>(0.40)   | 0.88<br>(0.32)   | 0.90<br>(0.30)   | 0.76<br>(0.43)   | 0.77<br>(0.42)   | 0.74<br>(0.44)   |
| General vaccine attitudes              | 4.05<br>(1.11)   | -                | -                | -                | -                | -                | -                           | -                | -                | -                | -                | -                | -                | -                |

<sup>a</sup> Education item in France differed from other surveys—see Table S1.

Table S4 (continued)

Descriptive statistics for all samples (Mean (SD))

|                                        | UK P<br>(Mar)    | UK P<br>(May)    | UK P<br>(Jul)    | UK P<br>(Sep)    | UK R<br>(May)    | UK R<br>(Jun)    | UK R<br>(Jul)    | UK R<br>(Sep)    | UK R<br>(Oct)    | US P<br>(Mar)    | US R<br>(May)    | US R<br>(Sep)    |
|----------------------------------------|------------------|------------------|------------------|------------------|------------------|------------------|------------------|------------------|------------------|------------------|------------------|------------------|
| Age                                    | 45.63<br>(15.69) | 44.72<br>(15.66) | 44.54<br>(15.65) | 38.18<br>(14.98) | 45.72<br>(15.94) | 45.90<br>(15.87) | 45.42<br>(16.60) | 45.47<br>(16.09) | 46.74<br>(16.04) | 45.14<br>(15.84) | 45.03<br>(16.09) | 44.76<br>(15.60) |
| Gender (Female)                        | 0.51<br>(0.50)   | 0.51<br>(0.50)   | 0.53<br>(0.50)   | 0.52<br>(0.50)   | 0.52<br>(0.50)   | 0.53<br>(0.50)   | 0.52<br>(0.50)   | 0.52<br>(0.50)   | 0.52<br>(0.50)   | 0.51<br>(0.50)   | 0.51<br>(0.50)   | 0.51<br>(0.50)   |
| Education                              | 3.45<br>(1.17)   | 3.50<br>(1.14)   | 3.58<br>(1.14)   | 3.54<br>(1.10)   | 3.17<br>(1.27)   | -                | 3.20<br>(1.23)   | 3.15<br>(1.28)   | 3.10<br>(1.23)   | 3.87<br>(0.88)   | 3.70<br>(0.90)   | -                |
| Numeracy                               | 3.22<br>(1.17)   | 3.23<br>(1.14)   | 3.04<br>(1.06)   | 3.24<br>(1.15)   | 2.64<br>(1.14)   | 2.74<br>(1.10)   | 2.61<br>(1.07)   | 2.60<br>(1.07)   | 2.78<br>(1.11)   | 3.14<br>(1.13)   | 2.76<br>(1.14)   | 2.58<br>(1.12)   |
| Politics (Conservative)                | 3.69<br>(1.43)   | 3.67<br>(1.39)   | 3.58<br>(1.36)   | 3.37<br>(1.36)   | 3.90<br>(1.35)   | 3.89<br>(1.19)   | 3.90<br>(1.33)   | 3.84<br>(1.36)   | 3.83<br>(1.32)   | 3.22<br>(1.65)   | 3.92<br>(1.69)   | 4.07<br>(1.65)   |
| Prosociality                           | 5.50<br>(1.07)   | 5.36<br>(1.19)   | 5.32<br>(1.16)   | 5.42<br>(1.17)   | 5.12<br>(1.33)   | 5.25<br>(1.29)   | 5.03<br>(1.29)   | 5.08<br>(1.39)   | 5.38<br>(1.36)   | 5.43<br>(1.28)   | 5.05<br>(1.36)   | 5.02<br>(1.44)   |
| General social trust                   | 4.04<br>(1.59)   | 4.12<br>(1.55)   | 4.11<br>(1.55)   | 3.69<br>(1.56)   | 3.74<br>(1.71)   | 3.58<br>(1.70)   | 3.86<br>(1.59)   | 3.68<br>(1.68)   | 3.66<br>(1.64)   | 4.01<br>(1.68)   | 3.79<br>(1.73)   | 3.47<br>(1.84)   |
| General trust: Experts                 | 4.24<br>(0.66)   | 4.11<br>(0.63)   | 4.14<br>(0.66)   | 4.17<br>(0.68)   | 3.89<br>(0.79)   | 3.88<br>(0.81)   | 3.92<br>(0.76)   | 3.90<br>(0.78)   | 3.92<br>(0.77)   | 4.22<br>(0.73)   | 3.96<br>(0.77)   | 3.89<br>(0.83)   |
| General trust: Govt                    | 2.82<br>(0.85)   | 2.80<br>(0.82)   | 2.60<br>(0.82)   | 2.44<br>(0.81)   | 2.82<br>(0.87)   | 2.64<br>(0.87)   | 2.70<br>(0.88)   | 2.60<br>(0.90)   | 2.55<br>(0.86)   | 2.55<br>(0.79)   | 2.68<br>(0.83)   | 2.52<br>(0.88)   |
| COVID trust: Politicians               | 3.81<br>(1.78)   | 3.80<br>(1.81)   | 3.16<br>(1.80)   | 2.57<br>(1.65)   | 4.00<br>(1.86)   | 3.38<br>(1.70)   | 3.60<br>(1.83)   | 3.23<br>(1.86)   | 3.04<br>(1.79)   | 3.06<br>(1.74)   | 3.11<br>(1.77)   | 2.93<br>(1.81)   |
| COVID Trust: National sci/med advisors | 5.27<br>(1.47)   | 5.13<br>(1.41)   | 5.12<br>(1.47)   | 4.88<br>(1.58)   | 4.94<br>(1.57)   | 4.58<br>(1.51)   | 4.88<br>(1.53)   | 4.66<br>(1.61)   | 4.60<br>(1.66)   | 5.46<br>(1.41)   | 5.15<br>(1.55)   | -                |
| COVID Trust: Independent scientists    | 4.88<br>(1.48)   | 4.59<br>(1.44)   | 4.74<br>(1.48)   | 4.77<br>(1.60)   | 4.46<br>(1.52)   | -                | 4.54<br>(1.52)   | 4.40<br>(1.61)   | 4.28<br>(1.63)   | 5.16<br>(1.48)   | 4.72<br>(1.60)   | -                |
| COVID Trust: WHO                       | 5.59<br>(1.40)   | 4.97<br>(1.55)   | 5.02<br>(1.62)   | 4.77<br>(1.70)   | 4.76<br>(1.69)   | 4.46<br>(1.69)   | 4.72<br>(1.66)   | 4.50<br>(1.69)   | 4.44<br>(1.71)   | 5.62<br>(1.55)   | 4.57<br>(1.90)   | -                |
| Personal efficacy                      | 5.04<br>(1.39)   | 5.59<br>(1.26)   | 5.47<br>(1.35)   | 5.12<br>(1.48)   | 5.36<br>(1.48)   | 5.13<br>(1.45)   | 5.30<br>(1.45)   | 5.09<br>(1.52)   | 5.03<br>(1.52)   | 5.25<br>(1.45)   | 5.32<br>(1.47)   | 5.14<br>(1.57)   |
| Govt efficacy                          | 3.86<br>(1.75)   | 3.85<br>(1.70)   | 3.48<br>(1.72)   | 3.03<br>(1.62)   | 4.13<br>(1.74)   | 3.66<br>(1.61)   | 3.88<br>(1.75)   | 3.58<br>(1.73)   | 3.36<br>(1.70)   | 3.28<br>(1.80)   | 3.76<br>(1.76)   | 3.25<br>(1.86)   |
| Perceived infection risk               | 4.89<br>(1.32)   | 4.26<br>(1.24)   | 3.96<br>(1.24)   | 4.26<br>(1.30)   | 4.14<br>(1.22)   | 3.94<br>(1.25)   | 3.86<br>(1.25)   | 4.13<br>(1.28)   | 4.27<br>(1.24)   | 3.98<br>(1.52)   | 3.91<br>(1.38)   | 4.11<br>(1.38)   |
| Worry about COVID                      | 5.80<br>(1.36)   | 5.72<br>(1.40)   | 5.28<br>(1.52)   | 5.36<br>(1.58)   | 5.60<br>(1.51)   | 5.34<br>(1.57)   | 5.30<br>(1.60)   | 5.39<br>(1.61)   | 5.39<br>(1.63)   | 5.49<br>(1.58)   | 5.58<br>(1.60)   | 5.43<br>(1.72)   |
| Vaccine—acceptance                     | 0.80<br>(0.40)   | 0.80<br>(0.40)   | 0.79<br>(0.41)   | 0.73<br>(0.44)   | 0.79<br>(0.41)   | 0.79<br>(0.41)   | 0.80<br>(0.40)   | 0.76<br>(0.43)   | 0.72<br>(0.45)   | 0.76<br>(0.43)   | 0.75<br>(0.44)   | 0.63<br>(0.48)   |
| Vaccine—recommend to vulnerable others | 0.92<br>(0.28)   | 0.87<br>(0.34)   | 0.85<br>(0.36)   | 0.80<br>(0.40)   | 0.84<br>(0.36)   | 0.83<br>(0.38)   | 0.84<br>(0.36)   | 0.80<br>(0.40)   | 0.76<br>(0.43)   | 0.86<br>(0.35)   | 0.80<br>(0.40)   | 0.68<br>(0.47)   |
| General vaccine attitudes              | -                | -                | -                | 4.21<br>(1.10)   | -                | -                | -                | 3.90<br>(1.14)   | 4.05<br>(1.06)   | -                | -                | -                |



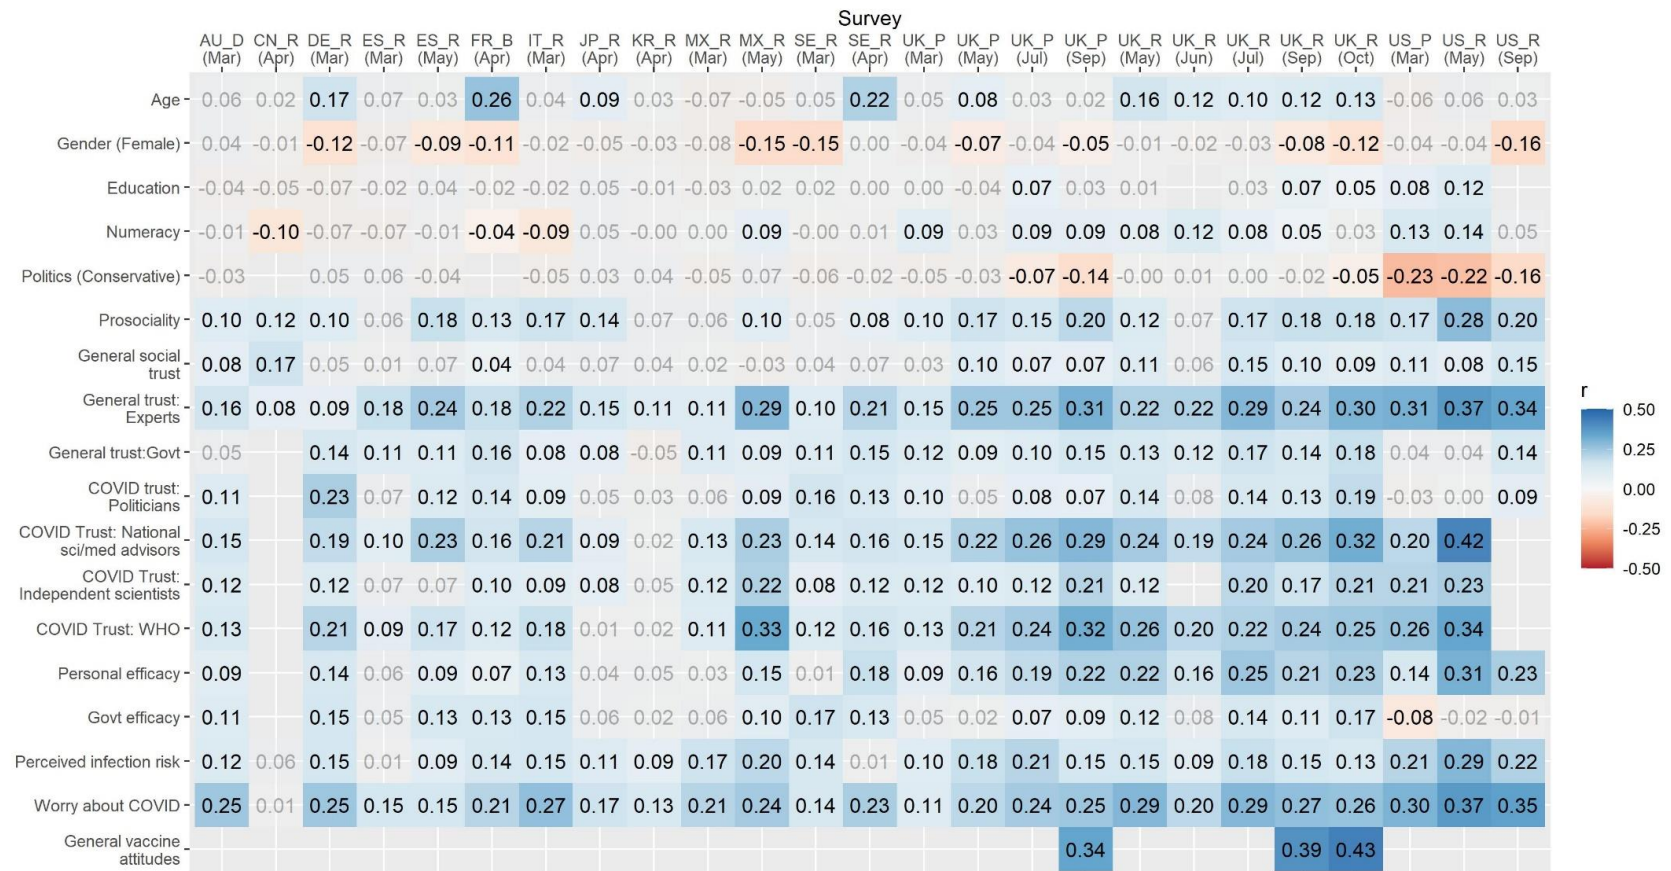

Figure S1. Point biserial correlations between predictors and vaccine acceptance across all samples. Greyed values are non-significant ( $p > .05$ ). Blank spaces indicate predictors which were not included in a given survey

Table S5

Full logistic regression results from model predicting vaccine acceptance (continued on following page)

|                                           | ALL                       | ALL<br>(UK)               | AU_D<br>(Mar)             | DE_R (Mar)                 | ES_R (Mar)                 | ES_R (May)                 | FR_B (Apr)                | IT_R (Mar)                  | JP_R (Apr)                | KR_R (Apr)                 | MX_R (Mar)                  | MX_R (May)                | SE_R (Mar)                | SE_R (Apr)                |
|-------------------------------------------|---------------------------|---------------------------|---------------------------|----------------------------|----------------------------|----------------------------|---------------------------|-----------------------------|---------------------------|----------------------------|-----------------------------|---------------------------|---------------------------|---------------------------|
|                                           | OR                        | OR                        | OR                        | OR                         | OR                         | OR                         | OR                        | OR                          | OR                        | OR                         | OR                          | OR                        | OR                        | OR                        |
| (Intercept)                               | 5.22 ***<br>[4.92 – 5.53] | 5.05 ***<br>[4.63 – 5.53] | 5.59 ***<br>[4.08 – 7.83] | 9.30 ***<br>[6.46 – 13.85] | 8.06 ***<br>[5.71 – 11.73] | 7.35 ***<br>[5.28 – 10.50] | 3.35 ***<br>[2.93 – 3.84] | 11.64 ***<br>[7.49 – 19.01] | 3.70 ***<br>[2.78 – 4.99] | 7.89 ***<br>[5.66 – 11.31] | 14.91 ***<br>[9.54 – 24.65] | 5.36 ***<br>[3.94 – 7.44] | 3.17 ***<br>[2.45 – 4.15] | 2.22 ***<br>[1.72 – 2.88] |
| Age                                       | 1.19 ***<br>[1.14 – 1.23] | 1.08 **<br>[1.02 – 1.15]  | 1.12<br>[0.88 – 1.42]     | 1.63 ***<br>[1.29 – 2.09]  | 1.11<br>[0.88 – 1.40]      | 1<br>[0.80 – 1.25]         | 1.68 ***<br>[1.53 – 1.84] | 1.08<br>[0.80 – 1.44]       | 1.23<br>[1.00 – 1.52]     | 0.97<br>[0.77 – 1.23]      | 0.75 *<br>[0.57 – 0.98]     | 0.87<br>[0.71 – 1.06]     | 1.12<br>[0.93 – 1.34]     | 1.44 ***<br>[1.19 – 1.76] |
| Gender (Female) <sup>a</sup>              | 0.59 ***<br>[0.55 – 0.64] | 0.61 ***<br>[0.55 – 0.69] | 1.2<br>[0.76 – 1.88]      | 0.38 ***<br>[0.23 – 0.60]  | 0.53 **<br>[0.33 – 0.84]   | 0.47 ***<br>[0.30 – 0.72]  | 0.65 ***<br>[0.54 – 0.77] | 0.59<br>[0.34 – 1.03]       | 0.76<br>[0.50 – 1.13]     | 0.75<br>[0.48 – 1.19]      | 0.50 *<br>[0.28 – 0.88]     | 0.43 ***<br>[0.28 – 0.64] | 0.43 ***<br>[0.30 – 0.63] | 0.71<br>[0.49 – 1.03]     |
| Education                                 | 1.03<br>[0.99 – 1.08]     | 1<br>[0.94 – 1.07]        | 0.85<br>[0.67 – 1.07]     | 0.86<br>[0.68 – 1.08]      | 0.96<br>[0.77 – 1.19]      | 1.11<br>[0.90 – 1.36]      | 0.99<br>[0.91 – 1.09]     | 0.98<br>[0.74 – 1.31]       | 1.13<br>[0.93 – 1.39]     | 0.98<br>[0.78 – 1.23]      | 0.95<br>[0.71 – 1.26]       | 0.98<br>[0.81 – 1.19]     | 1.05<br>[0.88 – 1.25]     | 0.97<br>[0.81 – 1.16]     |
| Numeracy                                  | 1.01<br>[0.97 – 1.05]     | 0.94 *<br>[0.89 – 0.99]   | 0.91<br>[0.73 – 1.15]     | 0.84<br>[0.67 – 1.05]      | 0.80 *<br>[0.65 – 0.98]    | 0.88<br>[0.72 – 1.09]      | 0.90 *<br>[0.82 – 0.99]   | 0.64 **<br>[0.48 – 0.84]    | 0.99<br>[0.81 – 1.23]     | 0.92<br>[0.73 – 1.16]      | 0.95<br>[0.73 – 1.26]       | 1<br>[0.82 – 1.22]        | 0.91<br>[0.76 – 1.10]     | 1.01<br>[0.84 – 1.21]     |
| Politics (Conservative)                   | 0.93 ***<br>[0.89 – 0.97] | 0.94 *<br>[0.89 – 0.99]   | 0.87<br>[0.68 – 1.11]     | 1.2<br>[0.96 – 1.52]       | 1.23<br>[0.98 – 1.55]      | 1.06<br>[0.84 – 1.33]      |                           | 0.88<br>[0.66 – 1.18]       | 1.02<br>[0.84 – 1.25]     | 1.02<br>[0.80 – 1.30]      | 0.85<br>[0.64 – 1.13]       | 1.18<br>[0.96 – 1.44]     | 0.9<br>[0.74 – 1.08]      | 0.91<br>[0.75 – 1.10]     |
| Prosociality                              | 1.06 **<br>[1.02 – 1.10]  | 1.05<br>[0.99 – 1.12]     | 0.98<br>[0.75 – 1.26]     | 1.06<br>[0.82 – 1.36]      | 0.98<br>[0.78 – 1.23]      | 1.2<br>[0.96 – 1.50]       | 1.07<br>[0.98 – 1.17]     | 1.05<br>[0.78 – 1.40]       | 1.16<br>[0.93 – 1.45]     | 1.26<br>[0.98 – 1.62]      | 1<br>[0.76 – 1.31]          | 0.98<br>[0.80 – 1.20]     | 0.96<br>[0.79 – 1.15]     | 0.96<br>[0.79 – 1.16]     |
| General social trust                      | 1.05 *<br>[1.01 – 1.10]   | 1.05<br>[0.99 – 1.11]     | 1.18<br>[0.91 – 1.52]     | 0.96<br>[0.75 – 1.24]      | 0.92<br>[0.73 – 1.16]      | 1.15<br>[0.92 – 1.44]      | 1<br>[0.91 – 1.10]        | 0.99<br>[0.74 – 1.34]       | 0.97<br>[0.77 – 1.22]     | 1.14<br>[0.87 – 1.48]      | 1.26<br>[0.95 – 1.70]       | 0.93<br>[0.76 – 1.14]     | 0.97<br>[0.80 – 1.19]     | 1.01<br>[0.83 – 1.24]     |
| General trust: Experts                    | 1.28 ***<br>[1.22 – 1.34] | 1.26 ***<br>[1.18 – 1.36] | 1.38 *<br>[1.06 – 1.80]   | 0.89<br>[0.66 – 1.20]      | 1.33 *<br>[1.03 – 1.74]    | 1.55 ***<br>[1.23 – 1.97]  | 1.18 **<br>[1.06 – 1.31]  | 1.45 *<br>[1.04 – 2.01]     | 1.25<br>[0.97 – 1.60]     | 1.3<br>[1.00 – 1.71]       | 1.05<br>[0.78 – 1.41]       | 1.49 ***<br>[1.18 – 1.88] | 1.14<br>[0.91 – 1.44]     | 1.18<br>[0.95 – 1.48]     |
| General trust: Govt                       | 1.02<br>[0.97 – 1.08]     | 0.94<br>[0.87 – 1.01]     | 0.74<br>[0.54 – 1.00]     | 1.07<br>[0.77 – 1.48]      | 1.24<br>[0.91 – 1.69]      | 1.01<br>[0.76 – 1.34]      | 1.08<br>[0.94 – 1.23]     | 0.97<br>[0.68 – 1.39]       | 1.07<br>[0.81 – 1.40]     | 0.70 *<br>[0.52 – 0.93]    | 1.28<br>[0.88 – 1.87]       | 1.02<br>[0.78 – 1.32]     | 0.98<br>[0.75 – 1.27]     | 1.06<br>[0.79 – 1.42]     |
| COVID trust:<br>Politicians               | 1.06<br>[0.99 – 1.13]     | 1.03<br>[0.94 – 1.13]     | 1.14<br>[0.78 – 1.66]     | 1.50 *<br>[1.02 – 2.21]    | 1.16<br>[0.83 – 1.63]      | 1.13<br>[0.81 – 1.57]      | 1.11<br>[0.97 – 1.27]     | 0.72<br>[0.45 – 1.12]       | 0.98<br>[0.67 – 1.41]     | 1.17<br>[0.86 – 1.58]      | 0.92<br>[0.61 – 1.37]       | 1.1<br>[0.81 – 1.48]      | 1.16<br>[0.85 – 1.58]     | 0.89<br>[0.64 – 1.23]     |
| COVID Trust: National<br>sci/med advisors | 1.22 ***<br>[1.15 – 1.29] | 1.22 ***<br>[1.12 – 1.33] | 1.08<br>[0.76 – 1.52]     | 0.94<br>[0.63 – 1.41]      | 0.95<br>[0.69 – 1.31]      | 1.66 ***<br>[1.24 – 2.24]  | 1.22 **<br>[1.08 – 1.39]  | 1.12<br>[0.72 – 1.77]       | 1.08<br>[0.79 – 1.48]     | 0.88<br>[0.63 – 1.24]      | 1.23<br>[0.89 – 1.70]       | 1.1<br>[0.83 – 1.44]      | 1.04<br>[0.77 – 1.39]     | 1.04<br>[0.77 – 1.41]     |
| COVID Trust:<br>Independent scientists    | 0.95 *<br>[0.91 – 1.00]   | 1<br>[0.93 – 1.07]        | 1.02<br>[0.76 – 1.34]     | 0.89<br>[0.65 – 1.22]      | 1<br>[0.76 – 1.32]         | 0.73 *<br>[0.56 – 0.95]    | 0.98<br>[0.89 – 1.09]     | 0.99<br>[0.70 – 1.37]       | 1.05<br>[0.78 – 1.41]     | 1.01<br>[0.74 – 1.37]      | 1.05<br>[0.77 – 1.41]       | 1.13<br>[0.89 – 1.42]     | 0.98<br>[0.78 – 1.23]     | 1.03<br>[0.83 – 1.27]     |
| COVID Trust: WHO                          | 1.19 ***<br>[1.14 – 1.25] | 1.11 **<br>[1.04 – 1.19]  | 0.96<br>[0.71 – 1.28]     | 1.58 **<br>[1.16 – 2.15]   | 1<br>[0.74 – 1.33]         | 1.03<br>[0.78 – 1.35]      | 1.05<br>[0.94 – 1.18]     | 1.11<br>[0.74 – 1.63]       | 0.9<br>[0.69 – 1.18]      | 1.07<br>[0.83 – 1.38]      | 1.13<br>[0.83 – 1.54]       | 1.57 ***<br>[1.22 – 2.01] | 1.17<br>[0.92 – 1.48]     | 1.27 *<br>[1.01 – 1.60]   |
| Personal efficacy                         | 1<br>[0.96 – 1.05]        | 0.92 *<br>[0.86 – 0.98]   | 0.85<br>[0.64 – 1.12]     | 1.04<br>[0.80 – 1.34]      | 0.93<br>[0.71 – 1.21]      | 0.91<br>[0.71 – 1.16]      | 0.87 **<br>[0.79 – 0.96]  | 1.02<br>[0.73 – 1.44]       | 0.92<br>[0.72 – 1.18]     | 1.01<br>[0.75 – 1.36]      | 0.85<br>[0.61 – 1.16]       | 0.82<br>[0.64 – 1.05]     | 0.73 **<br>[0.59 – 0.90]  | 1.09<br>[0.90 – 1.32]     |
| Govt efficacy                             | 1.01<br>[0.96 – 1.08]     | 1.07<br>[0.99 – 1.16]     | 1.25<br>[0.88 – 1.79]     | 0.93<br>[0.69 – 1.25]      | 0.97<br>[0.70 – 1.33]      | 1.08<br>[0.79 – 1.47]      | 1.05<br>[0.93 – 1.19]     | 1.35<br>[0.92 – 1.98]       | 1.15<br>[0.81 – 1.64]     | 1.05<br>[0.75 – 1.46]      | 1.01<br>[0.68 – 1.51]       | 0.87<br>[0.65 – 1.17]     | 1.2<br>[0.90 – 1.61]      | 1.13<br>[0.85 – 1.50]     |
| Perceived infection risk                  | 1.13 ***<br>[1.08 – 1.17] | 1.14 ***<br>[1.08 – 1.21] | 1.06<br>[0.82 – 1.37]     | 1.49 **<br>[1.16 – 1.92]   | 1<br>[0.80 – 1.25]         | 1.11<br>[0.89 – 1.38]      | 1.29 ***<br>[1.18 – 1.42] | 1.47 **<br>[1.11 – 1.95]    | 1.2<br>[0.97 – 1.48]      | 1.07<br>[0.83 – 1.38]      | 1.44 *<br>[1.07 – 1.94]     | 1.28 *<br>[1.03 – 1.59]   | 1.33 **<br>[1.09 – 1.62]  | 0.79 *<br>[0.65 – 0.97]   |
| Worry about COVID                         | 1.47 ***<br>[1.41 – 1.53] | 1.51 ***<br>[1.42 – 1.60] | 1.69 ***<br>[1.34 – 2.16] | 1.33 *<br>[1.05 – 1.69]    | 1.36 *<br>[1.07 – 1.73]    | 1.19<br>[0.95 – 1.48]      | 1.36 ***<br>[1.24 – 1.50] | 1.54 **<br>[1.18 – 2.03]    | 1.33 **<br>[1.07 – 1.65]  | 1.24<br>[0.96 – 1.59]      | 1.66 ***<br>[1.26 – 2.21]   | 1.31 *<br>[1.05 – 1.62]   | 1.34 **<br>[1.10 – 1.63]  | 1.77 ***<br>[1.44 – 2.19] |
| Observations                              | 19216                     | 8398                      | 644                       | 639                        | 668                        | 666                        | 2969                      | 530                         | 590                       | 677                        | 624                         | 682                       | 652                       | 653                       |
| R <sup>2</sup> Tjur                       | 0.128                     | 0.101                     | 0.096                     | 0.184                      | 0.061                      | 0.137                      | 0.151                     | 0.141                       | 0.077                     | 0.04                       | 0.115                       | 0.197                     | 0.102                     | 0.132                     |

Odds ratios [95% CI] shown, all continuous measures were standardized (scaled and mean-centered) prior to analysis. For space, samples are defined by their two character ISO country code and a letter denoting participant source (B, BVA; D, Dynata; P, Prolific; R, Respondi). <sup>a</sup>Gender is unstandardized. Political orientation data was not collected in France; this sample is excluded from pooled data.

\*p < .05, \*\*p < .01, \*\*\*p < .001

Table S5 (continued)

## Full logistic regression results from model predicting vaccine acceptance

|                                        | UK_P (Mar)<br>OR          | UK_P (May)<br>OR           | UK_P (Jul)<br>OR          | UK_P (Sep)<br>OR          | UK_R (May)<br>OR          | UK_R (Jul)<br>OR          | UK_R (Sep)<br>OR          | UK_R (Oct)<br>OR          | US_P (Mar)<br>OR          | US_R (May)<br>OR          |
|----------------------------------------|---------------------------|----------------------------|---------------------------|---------------------------|---------------------------|---------------------------|---------------------------|---------------------------|---------------------------|---------------------------|
| (Intercept)                            | 5.20 ***<br>[3.87 – 7.11] | 7.58 ***<br>[5.81 – 10.07] | 6.42 ***<br>[5.06 – 8.23] | 4.14 ***<br>[3.47 – 4.98] | 5.62 ***<br>[4.37 – 7.33] | 6.68 ***<br>[5.22 – 8.68] | 5.56 ***<br>[4.57 – 6.81] | 4.91 ***<br>[4.05 – 6.00] | 4.66 ***<br>[3.46 – 6.38] | 5.12 ***<br>[3.71 – 7.21] |
| Age                                    | 1.18<br>[0.96 – 1.46]     | 1.38 ***<br>[1.15 – 1.65]  | 1.20 *<br>[1.02 – 1.42]   | 1.12<br>[0.99 – 1.27]     | 1.48 ***<br>[1.23 – 1.80] | 1.38 ***<br>[1.16 – 1.65] | 1.39 ***<br>[1.21 – 1.59] | 1.37 ***<br>[1.20 – 1.58] | 0.91<br>[0.74 – 1.13]     | 1.2<br>[0.95 – 1.52]      |
| Gender (Female)                        | 0.79<br>[0.52 – 1.20]     | 0.53 ***<br>[0.37 – 0.75]  | 0.56 ***<br>[0.41 – 0.76] | 0.62 ***<br>[0.49 – 0.79] | 0.78<br>[0.55 – 1.08]     | 0.68 *<br>[0.49 – 0.94]   | 0.50 ***<br>[0.38 – 0.64] | 0.44 ***<br>[0.34 – 0.57] | 0.72<br>[0.48 – 1.09]     | 0.74<br>[0.48 – 1.13]     |
| Education                              | 0.98<br>[0.80 – 1.21]     | 0.85<br>[0.71 – 1.00]      | 1.13<br>[0.97 – 1.32]     | 1.02<br>[0.91 – 1.15]     | 1.05<br>[0.88 – 1.24]     | 1.07<br>[0.91 – 1.26]     | 1.11<br>[0.98 – 1.27]     | 1.18 *<br>[1.04 – 1.34]   | 1.08<br>[0.88 – 1.32]     | 1.05<br>[0.85 – 1.30]     |
| Numeracy                               | 1.30 *<br>[1.05 – 1.62]   | 0.99<br>[0.84 – 1.17]      | 1.20 *<br>[1.02 – 1.41]   | 1.12<br>[0.99 – 1.26]     | 1.24 *<br>[1.05 – 1.48]   | 1.11<br>[0.95 – 1.32]     | 1<br>[0.88 – 1.14]        | 1<br>[0.88 – 1.13]        | 1.21<br>[0.98 – 1.50]     | 1.41 **<br>[1.13 – 1.78]  |
| Politics (Conservative)                | 0.83<br>[0.66 – 1.05]     | 0.9<br>[0.74 – 1.09]       | 0.92<br>[0.77 – 1.11]     | 0.85 *<br>[0.74 – 0.97]   | 0.91<br>[0.76 – 1.10]     | 0.95<br>[0.79 – 1.13]     | 0.88<br>[0.77 – 1.01]     | 0.86 *<br>[0.75 – 0.99]   | 0.73 *<br>[0.57 – 0.93]   | 0.77<br>[0.58 – 1.01]     |
| Prosociality                           | 1.09<br>[0.89 – 1.34]     | 1.19 *<br>[1.01 – 1.41]    | 1.15<br>[0.99 – 1.34]     | 1.11<br>[0.98 – 1.26]     | 0.89<br>[0.74 – 1.06]     | 1.04<br>[0.88 – 1.23]     | 1.09<br>[0.96 – 1.25]     | 1.07<br>[0.94 – 1.23]     | 1<br>[0.81 – 1.23]        | 1.2<br>[0.96 – 1.51]      |
| General social trust                   | 0.85<br>[0.68 – 1.06]     | 1.04<br>[0.86 – 1.25]      | 0.94<br>[0.79 – 1.12]     | 1.03<br>[0.91 – 1.17]     | 1.06<br>[0.88 – 1.27]     | 1.19<br>[1.00 – 1.43]     | 1.09<br>[0.96 – 1.25]     | 0.97<br>[0.85 – 1.11]     | 1.14<br>[0.90 – 1.44]     | 0.97<br>[0.77 – 1.23]     |
| General trust: Experts                 | 1.06<br>[0.83 – 1.34]     | 1.39 **<br>[1.13 – 1.70]   | 1.38 ***<br>[1.16 – 1.65] | 1.39 ***<br>[1.20 – 1.60] | 1.12<br>[0.91 – 1.38]     | 1.42 ***<br>[1.17 – 1.71] | 1.23 **<br>[1.06 – 1.44]  | 1.45 ***<br>[1.24 – 1.70] | 1.53 **<br>[1.16 – 2.03]  | 1.36 *<br>[1.02 – 1.82]   |
| General trust:Govt                     | 1.27<br>[0.96 – 1.68]     | 1<br>[0.79 – 1.27]         | 1.06<br>[0.86 – 1.31]     | 1.27 **<br>[1.08 – 1.51]  | 1.13<br>[0.90 – 1.43]     | 1.11<br>[0.88 – 1.38]     | 1.14<br>[0.95 – 1.37]     | 1.03<br>[0.86 – 1.22]     | 0.87<br>[0.67 – 1.13]     | 0.96<br>[0.72 – 1.28]     |
| COVID trust: Politicians               | 1.17<br>[0.82 – 1.67]     | 0.98<br>[0.73 – 1.31]      | 1.1<br>[0.85 – 1.44]      | 0.93<br>[0.76 – 1.14]     | 1.01<br>[0.76 – 1.33]     | 1.2<br>[0.89 – 1.62]      | 1.11<br>[0.88 – 1.39]     | 1.26 *<br>[1.01 – 1.56]   | 1.21<br>[0.86 – 1.69]     | 1.01<br>[0.73 – 1.40]     |
| COVID Trust: National sci/med advisors | 1.18<br>[0.88 – 1.59]     | 1.50 ***<br>[1.18 – 1.89]  | 1.22<br>[0.99 – 1.50]     | 1.14<br>[0.97 – 1.34]     | 1.17<br>[0.92 – 1.50]     | 0.95<br>[0.74 – 1.22]     | 1.25 *<br>[1.04 – 1.50]   | 1.29 **<br>[1.07 – 1.56]  | 0.78<br>[0.57 – 1.04]     | 1.95 ***<br>[1.41 – 2.73] |
| COVID Trust: Independent scientists    | 1.08<br>[0.84 – 1.37]     | 0.89<br>[0.73 – 1.08]      | 0.83 *<br>[0.69 – 0.99]   | 0.93<br>[0.80 – 1.07]     | 0.84<br>[0.68 – 1.04]     | 1.02<br>[0.83 – 1.25]     | 0.88<br>[0.74 – 1.04]     | 1<br>[0.85 – 1.17]        | 1.12<br>[0.89 – 1.41]     | 0.81<br>[0.62 – 1.06]     |
| COVID Trust: WHO                       | 1.05<br>[0.80 – 1.35]     | 1.26 *<br>[1.04 – 1.53]    | 1.24 *<br>[1.03 – 1.50]   | 1.45 ***<br>[1.25 – 1.68] | 1.52 ***<br>[1.22 – 1.88] | 1.06<br>[0.85 – 1.32]     | 1.32 **<br>[1.11 – 1.57]  | 1.04<br>[0.87 – 1.24]     | 1.17<br>[0.90 – 1.51]     | 1.02<br>[0.76 – 1.37]     |
| Personal efficacy                      | 1.06<br>[0.86 – 1.31]     | 1.1<br>[0.92 – 1.30]       | 1.05<br>[0.89 – 1.23]     | 1.1<br>[0.96 – 1.25]      | 1.06<br>[0.87 – 1.29]     | 1.16<br>[0.96 – 1.39]     | 1.03<br>[0.89 – 1.18]     | 1.03<br>[0.89 – 1.18]     | 1.23<br>[0.99 – 1.52]     | 1.08<br>[0.84 – 1.38]     |
| Govt efficacy                          | 0.84<br>[0.62 – 1.13]     | 0.82<br>[0.63 – 1.05]      | 1.06<br>[0.83 – 1.34]     | 1<br>[0.84 – 1.20]        | 1.02<br>[0.79 – 1.30]     | 0.96<br>[0.73 – 1.27]     | 0.95<br>[0.77 – 1.17]     | 1.04<br>[0.86 – 1.27]     | 1.05<br>[0.77 – 1.43]     | 0.98<br>[0.72 – 1.34]     |
| Perceived infection risk               | 1.18<br>[0.96 – 1.46]     | 1.39 ***<br>[1.16 – 1.66]  | 1.30 **<br>[1.09 – 1.54]  | 1.04<br>[0.90 – 1.18]     | 1.19<br>[1.00 – 1.42]     | 1.18<br>[0.98 – 1.41]     | 1.09<br>[0.94 – 1.26]     | 0.99<br>[0.86 – 1.13]     | 1.26<br>[1.00 – 1.59]     | 1.46 **<br>[1.14 – 1.86]  |
| Worry about COVID-19                   | 1.1<br>[0.88 – 1.36]      | 1.25 *<br>[1.04 – 1.48]    | 1.41 ***<br>[1.19 – 1.66] | 1.37 ***<br>[1.19 – 1.57] | 1.58 ***<br>[1.33 – 1.88] | 1.63 ***<br>[1.36 – 1.96] | 1.56 ***<br>[1.36 – 1.80] | 1.43 ***<br>[1.23 – 1.65] | 1.47 **<br>[1.17 – 1.87]  | 1.27<br>[0.99 – 1.64]     |
| Observations                           | 698                       | 1143                       | 1314                      | 1845                      | 1095                      | 1249                      | 1772                      | 1702                      | 693                       | 680                       |
| R <sup>2</sup> Tjur                    | 0.068                     | 0.172                      | 0.165                     | 0.192                     | 0.168                     | 0.169                     | 0.174                     | 0.192                     | 0.184                     | 0.283                     |

Odds ratios [95CI] shown, all continuous measures were standardized (scaled and mean-centered) prior to analysis. For space, samples are defined by their two character ISO country code and a letter denoting participant source (R, Respondi; P, Prolific). Gender is unstandardized

\*p<.05, \*\*p<.01, \*\*\*p<.001

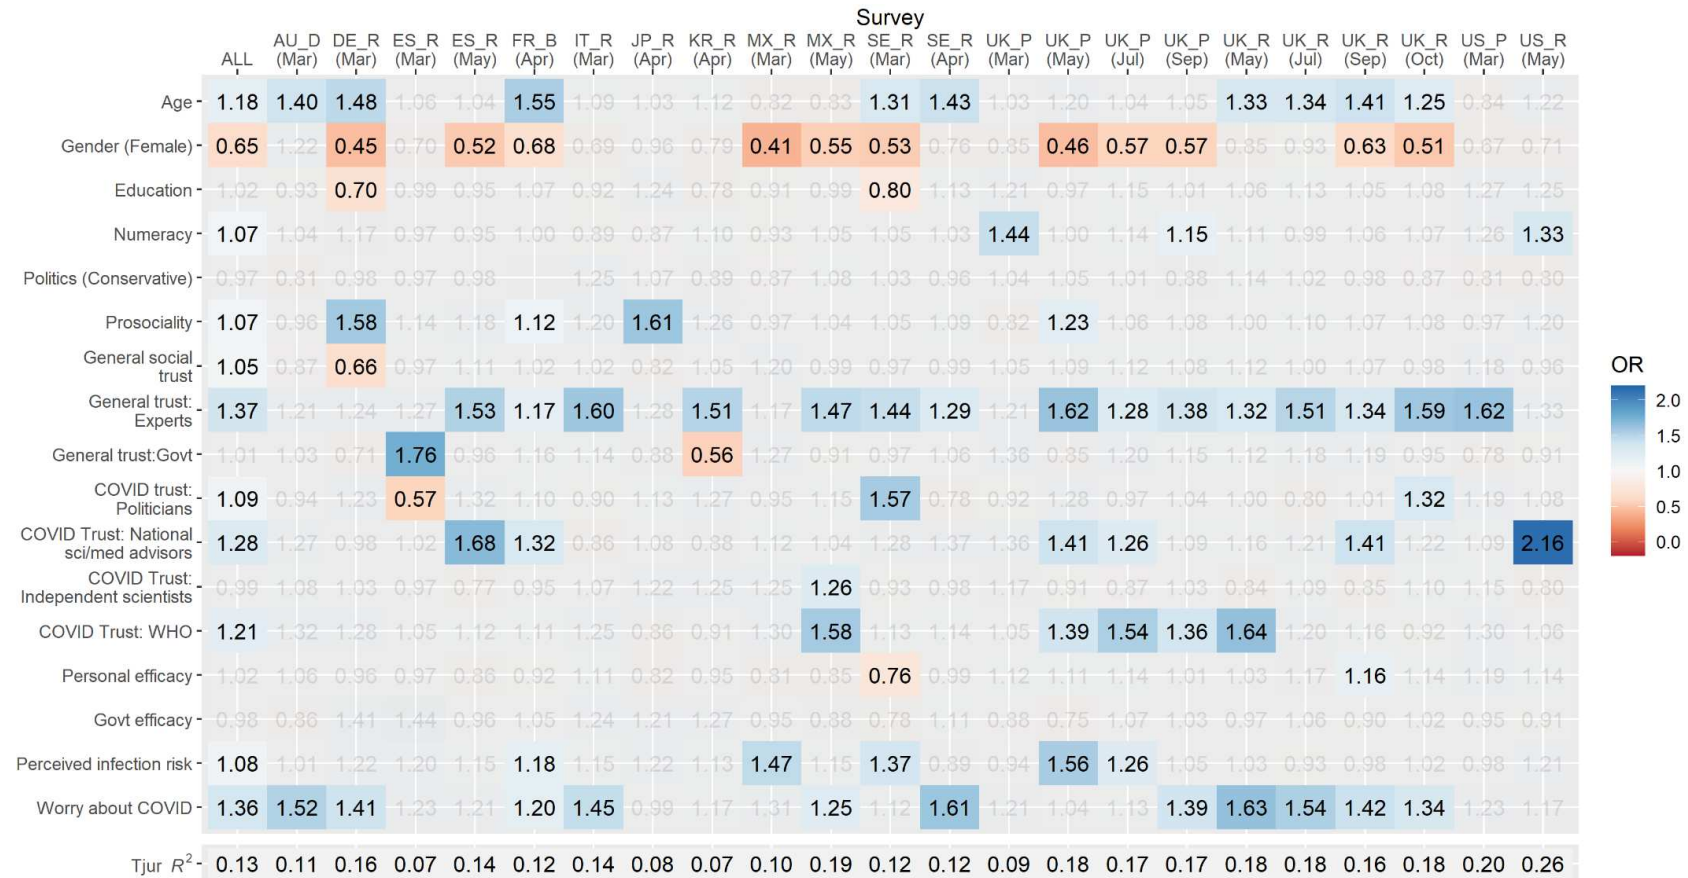

Figure S2. Heatmap of odds ratios in model predicting recommending vaccine to vulnerable friends/family. Columns represent individual samples and rows represent predictors in model. Grey values are non-significant,  $p > .05$ . Red shading indicates a lower likelihood of vaccine acceptance and blue shading a higher likelihood. For space, samples are defined by their two character ISO country code and a letter denoting participant source (B, BVA; D, Dynata; R, Respondi). Political orientation data was not collected in France, this sample is excluded from pooled data.



Table S6

Full logistic regression results from model predicting vaccine recommendation to vulnerable friends or family (continued on following page)

|                                        | <b>ALL</b><br>OR          | <b>AUD</b><br>(Mar)<br>OR   | <b>DER</b><br>(Mar)<br>OR    | <b>ESR</b><br>(Mar)<br>OR   | <b>ESR</b><br>(May)<br>OR  | <b>FRB</b><br>(Apr)<br>OR | <b>ITR</b><br>(Mar)<br>OR   | <b>JPR</b><br>(Apr)<br>OR | <b>KRR</b><br>(Apr)<br>OR   | <b>MXR</b><br>(Mar)<br>OR    | <b>MXR</b><br>(May)<br>OR | <b>SE R</b><br>(Mar)<br>OR | <b>SE R</b><br>(Apr)<br>OR |
|----------------------------------------|---------------------------|-----------------------------|------------------------------|-----------------------------|----------------------------|---------------------------|-----------------------------|---------------------------|-----------------------------|------------------------------|---------------------------|----------------------------|----------------------------|
| (Intercept)                            | 7.64 ***<br>[7.15 – 8.17] | 10.40 ***<br>[7.01 – 16.08] | 21.06 ***<br>[13.01 – 36.22] | 13.37 ***<br>[8.82 – 21.29] | 8.84 ***<br>[6.21 – 12.98] | 6.45 ***<br>[5.50 – 7.61] | 14.40 ***<br>[8.98 – 24.48] | 4.88 ***<br>[3.58 – 6.79] | 11.66 ***<br>[7.94 – 17.84] | 22.54 ***<br>[13.36 – 41.23] | 5.04 ***<br>[3.72 – 6.96] | 5.49 ***<br>[4.05 – 7.60]  | 3.72 ***<br>[2.80 – 5.01]  |
| Age                                    | 1.18 ***<br>[1.13 – 1.24] | 1.40 *<br>[1.05 – 1.88]     | 1.48 *<br>[1.09 – 2.02]      | 1.06<br>[0.80 – 1.41]       | 1.04<br>[0.83 – 1.32]      | 1.55 ***<br>[1.39 – 1.73] | 1.09<br>[0.79 – 1.51]       | 1.03<br>[0.81 – 1.29]     | 1.12<br>[0.86 – 1.48]       | 0.82<br>[0.60 – 1.11]        | 0.83<br>[0.68 – 1.02]     | 1.31 *<br>[1.06 – 1.63]    | 1.43 **<br>[1.15 – 1.78]   |
| Gender (Female) <sup>a</sup>           | 0.65 ***<br>[0.59 – 0.70] | 1.22<br>[0.71 – 2.10]       | 0.45 **<br>[0.25 – 0.81]     | 0.7<br>[0.40 – 1.21]        | 0.52 **<br>[0.32 – 0.81]   | 0.68 ***<br>[0.56 – 0.84] | 0.69<br>[0.37 – 1.26]       | 0.96<br>[0.62 – 1.50]     | 0.79<br>[0.47 – 1.32]       | 0.41 **<br>[0.20 – 0.77]     | 0.55 **<br>[0.36 – 0.82]  | 0.53 **<br>[0.35 – 0.81]   | 0.76<br>[0.50 – 1.13]      |
| Education                              | 1.02<br>[0.98 – 1.07]     | 0.93<br>[0.70 – 1.23]       | 0.70 *<br>[0.52 – 0.93]      | 0.99<br>[0.76 – 1.29]       | 0.95<br>[0.76 – 1.18]      | 1.07<br>[0.97 – 1.18]     | 0.92<br>[0.67 – 1.26]       | 1.24<br>[0.99 – 1.55]     | 0.78<br>[0.59 – 1.02]       | 0.91<br>[0.65 – 1.25]        | 0.99<br>[0.81 – 1.21]     | 0.80 *<br>[0.65 – 0.98]    | 1.13<br>[0.93 – 1.37]      |
| Numeracy                               | 1.07 ***<br>[1.03 – 1.12] | 1.04<br>[0.79 – 1.40]       | 1.17<br>[0.88 – 1.58]        | 0.97<br>[0.75 – 1.27]       | 0.95<br>[0.76 – 1.19]      | 1<br>[0.91 – 1.11]        | 0.89<br>[0.65 – 1.23]       | 0.87<br>[0.70 – 1.10]     | 1.1<br>[0.84 – 1.45]        | 0.93<br>[0.69 – 1.27]        | 1.05<br>[0.86 – 1.29]     | 1.05<br>[0.85 – 1.30]      | 1.03<br>[0.85 – 1.27]      |
| Politics (Conservative)                | 0.97<br>[0.93 – 1.01]     | 0.81<br>[0.60 – 1.08]       | 0.98<br>[0.73 – 1.31]        | 0.97<br>[0.74 – 1.29]       | 0.98<br>[0.77 – 1.24]      |                           | 1.25<br>[0.91 – 1.72]       | 1.07<br>[0.86 – 1.33]     | 0.89<br>[0.67 – 1.17]       | 0.87<br>[0.64 – 1.20]        | 1.08<br>[0.89 – 1.32]     | 1.03<br>[0.84 – 1.27]      | 0.96<br>[0.78 – 1.19]      |
| Prosociality                           | 1.07 **<br>[1.03 – 1.12]  | 0.96<br>[0.70 – 1.31]       | 1.58 **<br>[1.14 – 2.19]     | 1.14<br>[0.87 – 1.49]       | 1.18<br>[0.94 – 1.49]      | 1.12 *<br>[1.01 – 1.23]   | 1.2<br>[0.88 – 1.62]        | 1.61 ***<br>[1.26 – 2.07] | 1.26<br>[0.95 – 1.66]       | 0.97<br>[0.72 – 1.31]        | 1.04<br>[0.84 – 1.27]     | 1.05<br>[0.85 – 1.30]      | 1.09<br>[0.89 – 1.34]      |
| General social trust                   | 1.05 *<br>[1.00 – 1.10]   | 0.87<br>[0.62 – 1.19]       | 0.66 *<br>[0.47 – 0.92]      | 0.97<br>[0.71 – 1.31]       | 1.11<br>[0.87 – 1.41]      | 1.02<br>[0.92 – 1.14]     | 1.02<br>[0.74 – 1.41]       | 0.82<br>[0.63 – 1.07]     | 1.05<br>[0.78 – 1.42]       | 1.2<br>[0.88 – 1.68]         | 0.99<br>[0.81 – 1.22]     | 0.97<br>[0.77 – 1.22]      | 0.99<br>[0.80 – 1.23]      |
| General trust: Experts                 | 1.37 ***<br>[1.31 – 1.44] | 1.21<br>[0.89 – 1.63]       | 1.24<br>[0.85 – 1.83]        | 1.27<br>[0.93 – 1.74]       | 1.53 ***<br>[1.20 – 1.96]  | 1.17 **<br>[1.04 – 1.31]  | 1.60 **<br>[1.14 – 2.25]    | 1.28<br>[0.97 – 1.69]     | 1.51 **<br>[1.12 – 2.05]    | 1.17<br>[0.85 – 1.60]        | 1.47 **<br>[1.17 – 1.86]  | 1.44 **<br>[1.12 – 1.85]   | 1.29 *<br>[1.02 – 1.63]    |
| General trust: Govt                    | 1.01<br>[0.96 – 1.08]     | 1.03<br>[0.72 – 1.47]       | 0.71<br>[0.46 – 1.10]        | 1.76 **<br>[1.20 – 2.62]    | 0.96<br>[0.71 – 1.30]      | 1.16<br>[0.99 – 1.35]     | 1.14<br>[0.77 – 1.70]       | 0.88<br>[0.66 – 1.18]     | 0.56 ***<br>[0.40 – 0.77]   | 1.27<br>[0.84 – 1.95]        | 0.91<br>[0.70 – 1.19]     | 0.97<br>[0.73 – 1.30]      | 1.06<br>[0.78 – 1.46]      |
| COVID trust: Politicians               | 1.09 *<br>[1.01 – 1.17]   | 0.94<br>[0.59 – 1.49]       | 1.23<br>[0.75 – 2.02]        | 0.57 *<br>[0.36 – 0.89]     | 1.32<br>[0.93 – 1.90]      | 1.1<br>[0.94 – 1.29]      | 0.9<br>[0.55 – 1.45]        | 1.13<br>[0.75 – 1.72]     | 1.27<br>[0.89 – 1.82]       | 0.95<br>[0.61 – 1.49]        | 1.15<br>[0.84 – 1.56]     | 1.57 *<br>[1.11 – 2.23]    | 0.78<br>[0.54 – 1.10]      |
| COVID Trust: National sci/med advisors | 1.28 ***<br>[1.21 – 1.36] | 1.27<br>[0.85 – 1.92]       | 0.98<br>[0.59 – 1.60]        | 1.02<br>[0.69 – 1.51]       | 1.68 ***<br>[1.24 – 2.30]  | 1.32 ***<br>[1.14 – 1.52] | 0.86<br>[0.54 – 1.37]       | 1.08<br>[0.77 – 1.53]     | 0.88<br>[0.61 – 1.28]       | 1.12<br>[0.78 – 1.61]        | 1.04<br>[0.78 – 1.37]     | 1.28<br>[0.93 – 1.75]      | 1.37<br>[0.99 – 1.91]      |
| COVID Trust: Independent scientists    | 0.99<br>[0.94 – 1.04]     | 1.08<br>[0.76 – 1.53]       | 1.03<br>[0.70 – 1.52]        | 0.97<br>[0.68 – 1.36]       | 0.77<br>[0.58 – 1.02]      | 0.95<br>[0.85 – 1.07]     | 1.07<br>[0.75 – 1.50]       | 1.22<br>[0.88 – 1.70]     | 1.25<br>[0.89 – 1.74]       | 1.25<br>[0.89 – 1.74]        | 1.26 *<br>[1.00 – 1.59]   | 0.93<br>[0.72 – 1.21]      | 0.98<br>[0.77 – 1.24]      |
| COVID Trust: WHO                       | 1.21 ***<br>[1.15 – 1.28] | 1.32<br>[0.93 – 1.85]       | 1.28<br>[0.86 – 1.90]        | 1.05<br>[0.74 – 1.47]       | 1.12<br>[0.84 – 1.49]      | 1.11<br>[0.98 – 1.26]     | 1.25<br>[0.83 – 1.86]       | 0.86<br>[0.63 – 1.15]     | 0.91<br>[0.66 – 1.23]       | 1.3<br>[0.93 – 1.81]         | 1.58 ***<br>[1.23 – 2.02] | 1.13<br>[0.87 – 1.47]      | 1.14<br>[0.89 – 1.46]      |
| Personal efficacy                      | 1.02<br>[0.97 – 1.06]     | 1.06<br>[0.76 – 1.47]       | 0.96<br>[0.70 – 1.30]        | 0.97<br>[0.71 – 1.32]       | 0.86<br>[0.66 – 1.11]      | 0.92<br>[0.82 – 1.02]     | 1.11<br>[0.77 – 1.59]       | 0.82<br>[0.62 – 1.07]     | 0.95<br>[0.69 – 1.31]       | 0.81<br>[0.56 – 1.15]        | 0.85<br>[0.66 – 1.10]     | 0.76 *<br>[0.60 – 0.96]    | 0.99<br>[0.80 – 1.22]      |
| Govt efficacy                          | 0.98<br>[0.92 – 1.05]     | 0.86<br>[0.55 – 1.33]       | 1.41<br>[0.97 – 2.05]        | 1.44<br>[0.96 – 2.20]       | 0.96<br>[0.69 – 1.33]      | 1.05<br>[0.91 – 1.21]     | 1.24<br>[0.81 – 1.89]       | 1.21<br>[0.81 – 1.81]     | 1.27<br>[0.87 – 1.85]       | 0.95<br>[0.61 – 1.48]        | 0.88<br>[0.65 – 1.19]     | 0.78<br>[0.56 – 1.07]      | 1.11<br>[0.82 – 1.52]      |
| Perceived infection risk               | 1.08 ***<br>[1.03 – 1.13] | 1.01<br>[0.74 – 1.37]       | 1.22<br>[0.89 – 1.68]        | 1.2<br>[0.91 – 1.58]        | 1.15<br>[0.91 – 1.45]      | 1.18 **<br>[1.06 – 1.31]  | 1.15<br>[0.83 – 1.58]       | 1.22<br>[0.96 – 1.55]     | 1.13<br>[0.84 – 1.50]       | 1.47 *<br>[1.06 – 2.04]      | 1.15<br>[0.92 – 1.43]     | 1.37 **<br>[1.10 – 1.71]   | 0.89<br>[0.72 – 1.10]      |
| Worry about COVID-19                   | 1.36 ***<br>[1.30 – 1.42] | 1.52 **<br>[1.15 – 2.03]    | 1.41 *<br>[1.05 – 1.90]      | 1.23<br>[0.92 – 1.64]       | 1.21<br>[0.96 – 1.52]      | 1.20 ***<br>[1.08 – 1.34] | 1.45 **<br>[1.09 – 1.92]    | 0.99<br>[0.78 – 1.25]     | 1.17<br>[0.88 – 1.53]       | 1.31<br>[0.96 – 1.79]        | 1.25 *<br>[1.01 – 1.56]   | 1.12<br>[0.90 – 1.38]      | 1.61 ***<br>[1.29 – 2.00]  |
| Observations                           | 19208                     | 643                         | 639                          | 668                         | 667                        | 2969                      | 530                         | 590                       | 677                         | 620                          | 681                       | 652                        | 653                        |
| R <sup>2</sup> Tjur                    | 0.131                     | 0.109                       | 0.162                        | 0.069                       | 0.136                      | 0.118                     | 0.137                       | 0.076                     | 0.073                       | 0.105                        | 0.186                     | 0.121                      | 0.124                      |

Odds ratios [95CI] shown, all continuous measures were standardized (scaled and mean-centered) prior to analysis. For space, samples are defined by their two character ISO country code and a letter denoting participant source (D, Dynata; P, Prolific; R, Respondi). Gender is unstandardized. Political orientation data was not collected in France; this sample is excluded from pooled data. \*p < .05, \*\*p < .01, \*\*\*p < .001

Table S6 (continued)

Full logistic regression results from model predicting vaccine recommendation to vulnerable others

|                                        | UK_P(Mar)                    | UK_P(May)                    | UK_P(Jul)                   | UK_P(Sep)                 | UK_R(May)                  | UK_R(Jul)                  | UK_R(Sep)                 | UK_R(Oct)                 | US_P(Mar)                   | US_R(May)                  |
|----------------------------------------|------------------------------|------------------------------|-----------------------------|---------------------------|----------------------------|----------------------------|---------------------------|---------------------------|-----------------------------|----------------------------|
|                                        | OR                           | OR                           | OR                          | OR                        | OR                         | OR                         | OR                        | OR                        | OR                          | OR                         |
| (Intercept)                            | 16.28 ***<br>[10.45 – 26.82] | 15.53 ***<br>[11.04 – 22.50] | 10.84 ***<br>[8.18 – 14.64] | 6.56 ***<br>[5.37 – 8.08] | 8.65 ***<br>[6.48 – 11.80] | 8.29 ***<br>[6.34 – 11.02] | 6.65 ***<br>[5.41 – 8.25] | 5.75 ***<br>[4.70 – 7.10] | 11.91 ***<br>[8.02 – 18.38] | 8.09 ***<br>[5.64 – 11.97] |
| Age                                    | 1.03<br>[0.76 – 1.39]        | 1.20<br>[0.97 – 1.49]        | 1.04<br>[0.86 – 1.26]       | 1.05<br>[0.92 – 1.21]     | 1.33 **<br>[1.08 – 1.65]   | 1.34 **<br>[1.10 – 1.64]   | 1.41 ***<br>[1.22 – 1.63] | 1.25 **<br>[1.08 – 1.44]  | 0.84<br>[0.64 – 1.10]       | 1.22<br>[0.94 – 1.58]      |
| Gender (Female)                        | 0.85<br>[0.46 – 1.55]        | 0.46 ***<br>[0.30 – 0.69]    | 0.57 **<br>[0.40 – 0.82]    | 0.57 ***<br>[0.44 – 0.74] | 0.85<br>[0.58 – 1.24]      | 0.93<br>[0.65 – 1.33]      | 0.63 ***<br>[0.48 – 0.82] | 0.51 ***<br>[0.39 – 0.66] | 0.67<br>[0.40 – 1.11]       | 0.71<br>[0.45 – 1.12]      |
| Education                              | 1.21<br>[0.89 – 1.62]        | 0.97<br>[0.79 – 1.18]        | 1.15<br>[0.96 – 1.37]       | 1.01<br>[0.89 – 1.15]     | 1.06<br>[0.88 – 1.29]      | 1.13<br>[0.94 – 1.35]      | 1.05<br>[0.91 – 1.20]     | 1.08<br>[0.94 – 1.23]     | 1.27<br>[0.98 – 1.64]       | 1.25<br>[0.99 – 1.58]      |
| Numeracy                               | 1.44 *<br>[1.05 – 2.02]      | 1.00<br>[0.82 – 1.22]        | 1.14<br>[0.95 – 1.37]       | 1.15 *<br>[1.00 – 1.32]   | 1.11<br>[0.92 – 1.35]      | 0.99<br>[0.83 – 1.19]      | 1.06<br>[0.93 – 1.22]     | 1.07<br>[0.94 – 1.22]     | 1.26<br>[0.96 – 1.66]       | 1.33 *<br>[1.04 – 1.72]    |
| Politics (Conservative)                | 1.04<br>[0.74 – 1.46]        | 1.05<br>[0.84 – 1.32]        | 1.01<br>[0.82 – 1.25]       | 0.88<br>[0.76 – 1.03]     | 1.14<br>[0.92 – 1.41]      | 1.02<br>[0.83 – 1.24]      | 0.98<br>[0.85 – 1.14]     | 0.87<br>[0.75 – 1.00]     | 0.81<br>[0.60 – 1.09]       | 0.80<br>[0.60 – 1.08]      |
| Prosociality                           | 0.82<br>[0.60 – 1.09]        | 1.23 *<br>[1.01 – 1.50]      | 1.06<br>[0.89 – 1.25]       | 1.08<br>[0.94 – 1.23]     | 1.00<br>[0.82 – 1.22]      | 1.1<br>[0.91 – 1.33]       | 1.07<br>[0.93 – 1.23]     | 1.08<br>[0.94 – 1.24]     | 0.97<br>[0.75 – 1.25]       | 1.20<br>[0.94 – 1.53]      |
| General social trust                   | 1.05<br>[0.77 – 1.43]        | 1.09<br>[0.87 – 1.36]        | 1.12<br>[0.92 – 1.37]       | 1.08<br>[0.95 – 1.24]     | 1.12<br>[0.91 – 1.39]      | 1.00<br>[0.81 – 1.21]      | 1.07<br>[0.93 – 1.24]     | 0.98<br>[0.85 – 1.13]     | 1.18<br>[0.89 – 1.57]       | 0.96<br>[0.75 – 1.24]      |
| General trust: Experts                 | 1.21<br>[0.87 – 1.69]        | 1.62 ***<br>[1.28 – 2.05]    | 1.28 *<br>[1.05 – 1.55]     | 1.38 ***<br>[1.19 – 1.61] | 1.32 *<br>[1.05 – 1.66]    | 1.51 ***<br>[1.23 – 1.84]  | 1.34 ***<br>[1.14 – 1.57] | 1.59 ***<br>[1.35 – 1.87] | 1.62 **<br>[1.17 – 2.27]    | 1.33<br>[0.98 – 1.81]      |
| General trust:Govt                     | 1.36<br>[0.90 – 2.06]        | 0.85<br>[0.64 – 1.13]        | 1.2<br>[0.93 – 1.53]        | 1.15<br>[0.96 – 1.38]     | 1.12<br>[0.86 – 1.44]      | 1.18<br>[0.92 – 1.51]      | 1.19<br>[0.98 – 1.44]     | 0.95<br>[0.80 – 1.14]     | 0.78<br>[0.55 – 1.08]       | 0.91<br>[0.67 – 1.24]      |
| COVID trust: Politicians               | 0.92<br>[0.55 – 1.53]        | 1.28<br>[0.91 – 1.83]        | 0.97<br>[0.71 – 1.32]       | 1.04<br>[0.83 – 1.30]     | 1.00<br>[0.73 – 1.37]      | 0.80<br>[0.57 – 1.13]      | 1.01<br>[0.79 – 1.28]     | 1.32 *<br>[1.05 – 1.66]   | 1.19<br>[0.77 – 1.81]       | 1.08<br>[0.75 – 1.54]      |
| COVID Trust: National sci/med advisors | 1.36<br>[0.90 – 2.07]        | 1.41 *<br>[1.07 – 1.85]      | 1.26 *<br>[1.00 – 1.58]     | 1.09<br>[0.91 – 1.30]     | 1.16<br>[0.88 – 1.52]      | 1.21<br>[0.91 – 1.59]      | 1.41 ***<br>[1.16 – 1.72] | 1.22<br>[1.00 – 1.48]     | 1.09<br>[0.76 – 1.55]       | 2.16 ***<br>[1.53 – 3.08]  |
| COVID Trust: Independent scientists    | 1.17<br>[0.83 – 1.64]        | 0.91<br>[0.72 – 1.15]        | 0.87<br>[0.70 – 1.06]       | 1.03<br>[0.88 – 1.20]     | 0.84<br>[0.65 – 1.07]      | 1.09<br>[0.86 – 1.37]      | 0.85<br>[0.71 – 1.01]     | 1.10<br>[0.93 – 1.30]     | 1.15<br>[0.86 – 1.53]       | 0.80<br>[0.59 – 1.06]      |
| COVID Trust: WHO                       | 1.05<br>[0.73 – 1.51]        | 1.39 **<br>[1.11 – 1.75]     | 1.54 ***<br>[1.25 – 1.90]   | 1.36 ***<br>[1.16 – 1.60] | 1.64 ***<br>[1.29 – 2.09]  | 1.2<br>[0.94 – 1.53]       | 1.16<br>[0.96 – 1.39]     | 0.92<br>[0.76 – 1.11]     | 1.30<br>[0.96 – 1.75]       | 1.06<br>[0.76 – 1.47]      |
| Personal efficacy                      | 1.12<br>[0.84 – 1.50]        | 1.11<br>[0.91 – 1.36]        | 1.14<br>[0.95 – 1.35]       | 1.01<br>[0.87 – 1.16]     | 1.03<br>[0.83 – 1.27]      | 1.17<br>[0.96 – 1.43]      | 1.16 *<br>[1.00 – 1.35]   | 1.14<br>[0.99 – 1.32]     | 1.19<br>[0.92 – 1.53]       | 1.14<br>[0.87 – 1.48]      |
| Govt efficacy                          | 0.88<br>[0.57 – 1.36]        | 0.75<br>[0.56 – 1.01]        | 1.07<br>[0.81 – 1.42]       | 1.03<br>[0.85 – 1.25]     | 0.97<br>[0.74 – 1.28]      | 1.06<br>[0.78 – 1.46]      | 0.9<br>[0.72 – 1.12]      | 1.02<br>[0.83 – 1.25]     | 0.95<br>[0.66 – 1.39]       | 0.91<br>[0.65 – 1.29]      |
| Perceived infection risk               | 0.94<br>[0.69 – 1.28]        | 1.56 ***<br>[1.25 – 1.94]    | 1.26 *<br>[1.03 – 1.53]     | 1.05<br>[0.91 – 1.21]     | 1.03<br>[0.84 – 1.27]      | 0.93<br>[0.75 – 1.14]      | 0.98<br>[0.84 – 1.14]     | 1.02<br>[0.88 – 1.17]     | 0.98<br>[0.73 – 1.31]       | 1.21<br>[0.92 – 1.58]      |
| Worry about COVID                      | 1.21<br>[0.89 – 1.62]        | 1.04<br>[0.84 – 1.28]        | 1.13<br>[0.93 – 1.37]       | 1.39 ***<br>[1.20 – 1.62] | 1.63 ***<br>[1.35 – 1.98]  | 1.54 ***<br>[1.26 – 1.89]  | 1.42 ***<br>[1.23 – 1.65] | 1.34 ***<br>[1.15 – 1.55] | 1.23<br>[0.92 – 1.64]       | 1.17<br>[0.89 – 1.53]      |
| Observations                           | 698                          | 1142                         | 1314                        | 1844                      | 1094                       | 1249                       | 1772                      | 1702                      | 693                         | 680                        |
| R <sup>2</sup> Tjur                    | 0.086                        | 0.181                        | 0.169                       | 0.167                     | 0.183                      | 0.185                      | 0.160                     | 0.182                     | 0.200                       | 0.261                      |

Odds ratios [95%CI] shown, all continuous measures were standardized (scaled and mean-centered) prior to analysis. For space, samples are defined by their two character ISO country code and a letter denoting participant source (D, Dynata; P, Prolific; R, Respondi). Gender is unstandardized. \*p < .05, \*\*p < .01, \*\*\*p < .001

Table S7

Results of multi-level model (samples nested by country and month) adjusting for survey-level variables.

|                                                         | <i>OR</i>     | <i>CI</i>    |
|---------------------------------------------------------|---------------|--------------|
| (Intercept)                                             | 6.59 ***      | 4.00 – 10.84 |
| Age                                                     | 1.20 ***      | 1.15 – 1.25  |
| Gender (Female)                                         | 0.58 ***      | 0.54 – 0.63  |
| Education                                               | 1.02          | 0.98 – 1.07  |
| Numeracy                                                | 1.02          | 0.98 – 1.05  |
| Politics (Conservative)                                 | 0.93 ***      | 0.89 – 0.97  |
| Prosociality                                            | 1.06 **       | 1.02 – 1.10  |
| General social trust                                    | 1.04          | 1.00 – 1.08  |
| General trust: Experts                                  | 1.30 ***      | 1.24 – 1.36  |
| General trust: Govt                                     | 1.05          | 1.00 – 1.11  |
| COVID trust: Politicians                                | 1.06          | 0.99 – 1.13  |
| COVID Trust: National sci/med advisors                  | 1.19 ***      | 1.13 – 1.26  |
| COVID Trust: Independent scientists                     | 0.94 *        | 0.90 – 0.99  |
| COVID Trust: WHO                                        | 1.23 ***      | 1.17 – 1.29  |
| Personal efficacy                                       | 1.01          | 0.96 – 1.05  |
| Govt efficacy                                           | 1.00          | 0.94 – 1.06  |
| Perceived infection risk                                | 1.15 ***      | 1.11 – 1.20  |
| Worry about COVID                                       | 1.44 ***      | 1.38 – 1.50  |
| Days since first case <sup>a</sup>                      | 0.91          | 0.62 – 1.35  |
| Total confirmed cases <sup>a</sup>                      | 0.46 ***      | 0.30 – 0.70  |
| Total confirmed deaths <sup>a</sup>                     | 3.07 ***      | 1.78 – 5.29  |
| Government intervention (Stringency Index) <sup>a</sup> | 0.93          | 0.83 – 1.05  |
| <b>Random effects</b>                                   |               |              |
| $\sigma^2$                                              | 3.29          |              |
| $\tau_{00}$ Country                                     | 0.18          |              |
| $\tau_{00}$ Month                                       | 0.24          |              |
| Intraclass Correlation Coefficient                      | 0.11          |              |
| $N_{\text{Country}}$                                    | 10            |              |
| $N_{\text{Month}}$                                      | 6             |              |
| Observations                                            | 19216         |              |
| Marginal $R^2$ / Conditional $R^2$                      | 0.218 / 0.306 |              |

Odds ratios [95CI] based on standardized (scaled and mean centered) continuous variables, except for gender which is unstandardized. <sup>a</sup> Denotes variables measured at the level of country and month of survey; due to the small number of countries and timepoints included in the model these estimates are biased and should be treated with caution (see Bryan & Jenkins, 2016; <https://doi.org/10.1093/esr/jcv059>). \* $p < .05$ , \*\* $p < .01$ , \*\*\* $p < .001$ .

Table S8

Result of logistic regression models predicting vaccine acceptance, including or excluding general vaccine attitudes.

|                                        | Basemodel                 |                           |                           | Including general vaccine attitudes |                           |                           |
|----------------------------------------|---------------------------|---------------------------|---------------------------|-------------------------------------|---------------------------|---------------------------|
|                                        | UKProlific (Sep)          | UKRespondi (Sep)          | UKRespondi (Oct)          | UKProlific (Sep)                    | UKRespondi (Sep)          | UKRespondi (Oct)          |
|                                        | OR                        | OR                        | OR                        | OR                                  | OR                        | OR                        |
| (Intercept)                            | 4.14 ***<br>[3.47 – 4.98] | 5.56 ***<br>[4.57 – 6.81] | 4.91 ***<br>[4.05 – 6.00] | 4.28 ***<br>[3.57 – 5.17]           | 6.17 ***<br>[5.02 – 7.67] | 5.40 ***<br>[4.39 – 6.69] |
| Age                                    | 1.12<br>[0.99 – 1.27]     | 1.39 ***<br>[1.21 – 1.59] | 1.37 ***<br>[1.20 – 1.58] | 1.15 *<br>[1.01 – 1.31]             | 1.32 ***<br>[1.15 – 1.52] | 1.25 **<br>[1.08 – 1.45]  |
| Gender (Female)                        | 0.62 ***<br>[0.49 – 0.79] | 0.50 ***<br>[0.38 – 0.64] | 0.44 ***<br>[0.34 – 0.57] | 0.63 ***<br>[0.49 – 0.80]           | 0.49 ***<br>[0.37 – 0.64] | 0.43 ***<br>[0.33 – 0.57] |
| Education                              | 1.02<br>[0.91 – 1.15]     | 1.11<br>[0.98 – 1.27]     | 1.18 *<br>[1.04 – 1.34]   | 1.00<br>[0.88 – 1.13]               | 1.08<br>[0.94 – 1.23]     | 1.14<br>[1.00 – 1.31]     |
| Numeracy                               | 1.12<br>[0.99 – 1.26]     | 1.00<br>[0.88 – 1.14]     | 1.00<br>[0.88 – 1.13]     | 1.06<br>[0.93 – 1.20]               | 0.93<br>[0.82 – 1.07]     | 0.87 *<br>[0.76 – 0.99]   |
| Politics (Conservative)                | 0.85 *<br>[0.74 – 0.97]   | 0.88<br>[0.77 – 1.01]     | 0.86 *<br>[0.75 – 0.99]   | 0.85 *<br>[0.74 – 0.98]             | 0.87<br>[0.75 – 1.01]     | 0.85 *<br>[0.73 – 0.98]   |
| Prosociality                           | 1.11<br>[0.98 – 1.26]     | 1.09<br>[0.96 – 1.25]     | 1.07<br>[0.94 – 1.23]     | 1.10<br>[0.96 – 1.25]               | 1.08<br>[0.94 – 1.24]     | 1.04<br>[0.90 – 1.20]     |
| General social trust                   | 1.03<br>[0.91 – 1.17]     | 1.09<br>[0.96 – 1.25]     | 0.97<br>[0.85 – 1.11]     | 1.03<br>[0.91 – 1.17]               | 1.04<br>[0.90 – 1.20]     | 0.96<br>[0.83 – 1.11]     |
| General trust: Experts                 | 1.39 ***<br>[1.20 – 1.60] | 1.23 **<br>[1.06 – 1.44]  | 1.45 ***<br>[1.24 – 1.70] | 1.28 **<br>[1.11 – 1.49]            | 1.11<br>[0.95 – 1.31]     | 1.29 **<br>[1.09 – 1.53]  |
| General trust: Govt                    | 1.27 **<br>[1.08 – 1.51]  | 1.14<br>[0.95 – 1.37]     | 1.03<br>[0.86 – 1.22]     | 1.24 *<br>[1.05 – 1.48]             | 1.16<br>[0.96 – 1.40]     | 0.99<br>[0.82 – 1.19]     |
| COVID trust: Politicians               | 0.93<br>[0.76 – 1.14]     | 1.11<br>[0.88 – 1.39]     | 1.26 *<br>[1.01 – 1.56]   | 0.95<br>[0.77 – 1.17]               | 1.17<br>[0.92 – 1.48]     | 1.35 *<br>[1.07 – 1.70]   |
| COVID Trust: National sci/med advisors | 1.14<br>[0.97 – 1.34]     | 1.25 *<br>[1.04 – 1.50]   | 1.29 **<br>[1.07 – 1.56]  | 1.12<br>[0.94 – 1.32]               | 1.14<br>[0.94 – 1.38]     | 1.20<br>[0.98 – 1.47]     |
| COVID Trust: Independent scientists    | 0.93<br>[0.80 – 1.07]     | 0.88<br>[0.74 – 1.04]     | 1.00<br>[0.85 – 1.17]     | 0.95<br>[0.82 – 1.11]               | 0.90<br>[0.75 – 1.07]     | 0.95<br>[0.80 – 1.13]     |
| COVID Trust: WHO                       | 1.45 ***<br>[1.25 – 1.68] | 1.32 **<br>[1.11 – 1.57]  | 1.04<br>[0.87 – 1.24]     | 1.41 ***<br>[1.21 – 1.64]           | 1.33 **<br>[1.11 – 1.59]  | 1.03<br>[0.85 – 1.25]     |
| Personal efficacy                      | 1.10<br>[0.96 – 1.25]     | 1.03<br>[0.89 – 1.18]     | 1.03<br>[0.89 – 1.18]     | 1.06<br>[0.93 – 1.22]               | 1.00<br>[0.86 – 1.16]     | 0.98<br>[0.84 – 1.14]     |
| Govt efficacy                          | 1.00<br>[0.84 – 1.20]     | 0.95<br>[0.77 – 1.17]     | 1.04<br>[0.86 – 1.27]     | 1.01<br>[0.84 – 1.22]               | 0.95<br>[0.77 – 1.18]     | 1.08<br>[0.88 – 1.33]     |
| Perceived infection risk               | 1.04<br>[0.90 – 1.18]     | 1.09<br>[0.94 – 1.26]     | 0.99<br>[0.86 – 1.13]     | 1.02<br>[0.88 – 1.17]               | 1.12<br>[0.96 – 1.31]     | 0.97<br>[0.83 – 1.12]     |
| Worry about COVID                      | 1.37 ***<br>[1.19 – 1.57] | 1.56 ***<br>[1.36 – 1.80] | 1.43 ***<br>[1.23 – 1.65] | 1.36 ***<br>[1.18 – 1.57]           | 1.47 ***<br>[1.26 – 1.70] | 1.39 ***<br>[1.19 – 1.63] |
| General vaccine attitudes              |                           |                           |                           | 1.69 ***<br>[1.51 – 1.89]           | 2.08 ***<br>[1.84 – 2.37] | 2.32 ***<br>[2.02 – 2.66] |
| Observations                           | 1845                      | 1772                      | 1702                      | 1839                                | 1767                      | 1698                      |
| R <sup>2</sup> Tjur                    | 0.192                     | 0.174                     | 0.192                     | 0.235                               | 0.247                     | 0.281                     |

Odds ratios [95CI] based on standardized (scaled and mean centered) continuous variables except for gender which is unstandardized.

\*p&lt;.05, \*\*p&lt;.01, \*\*\*p&lt;.001
